# Supplementary material
Source: publisher site journal article supplement (https://www.dovepress.com/get_supplementary_file.php?f=303589.docx)
Supplement: Supplementary file 1 [file get_supplementary_file.php]

**SUPLEMENTAL DATA**

**A combination of RNA-Seq analysis and use of TCGA database for determining the molecular mechanism and identifying potential drugs for GJB1 in ovarian cancer**

Jie Yang1, Yaqin Fan1, Beibei Xie2, Dan Yang1, 2 *

*1 Obstetrics and Gynecology, Yuncheng County People's Hospital*

*2 Faculty of Health, Yantai Nanshan University, Yantai, China*

Postal address: No. 184 Tangta Road, Yuncheng County, Heze City, Shandong 274700, China

**E-mail address:**

[yangjie20200101@qq.com](mailto:yangjie20200101@qq.com) (Jie Yang)

[fanyaqin2014@163.com](mailto:fanyaqin2014@163.com) (Yaqin Fan)

[xiebeibei1992@gmail.com](mailto:xiebeibei1992@gmail.com) (Beibei Xie)

[861483190@qq.com](mailto:861483190@qq.com) (Dan Yang)

* Corresponding author

**Supplementary Figures:**

**
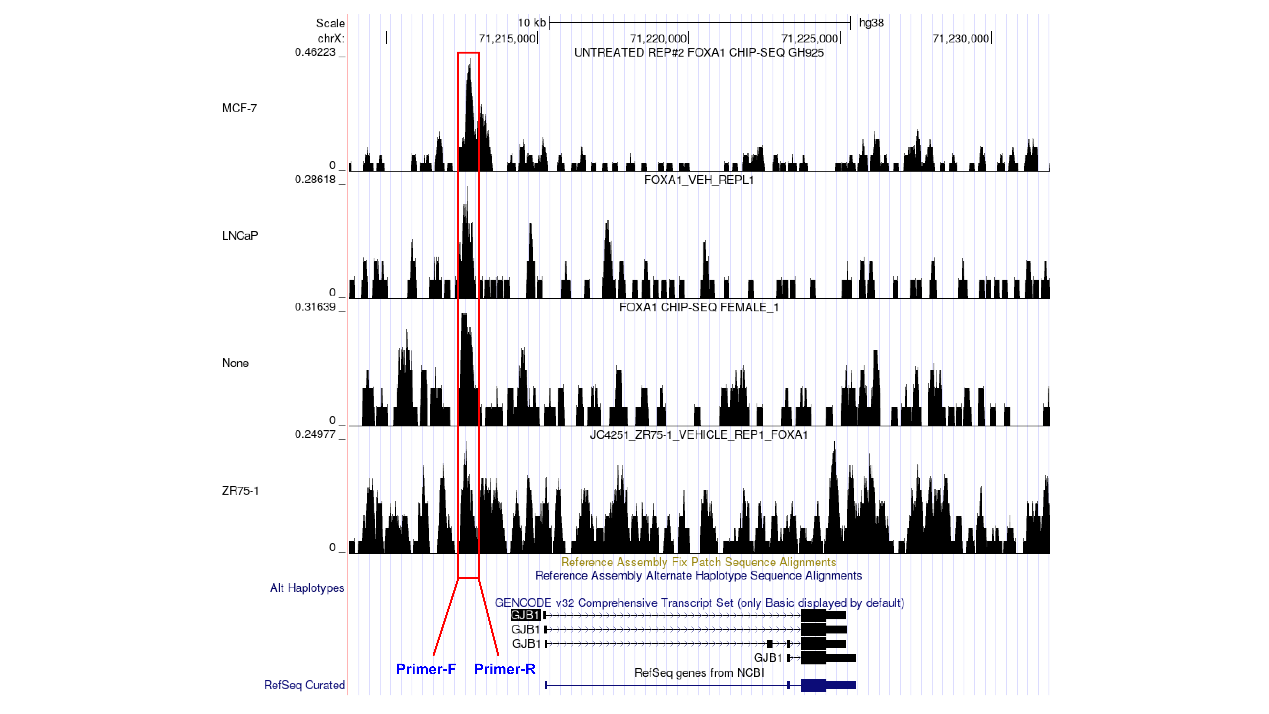
**

**Figure S1.** Identify the relationship between FOXA1 and promoter of GJB1 based on the CHIP-seq data from Cistrome Database and the location of primers.


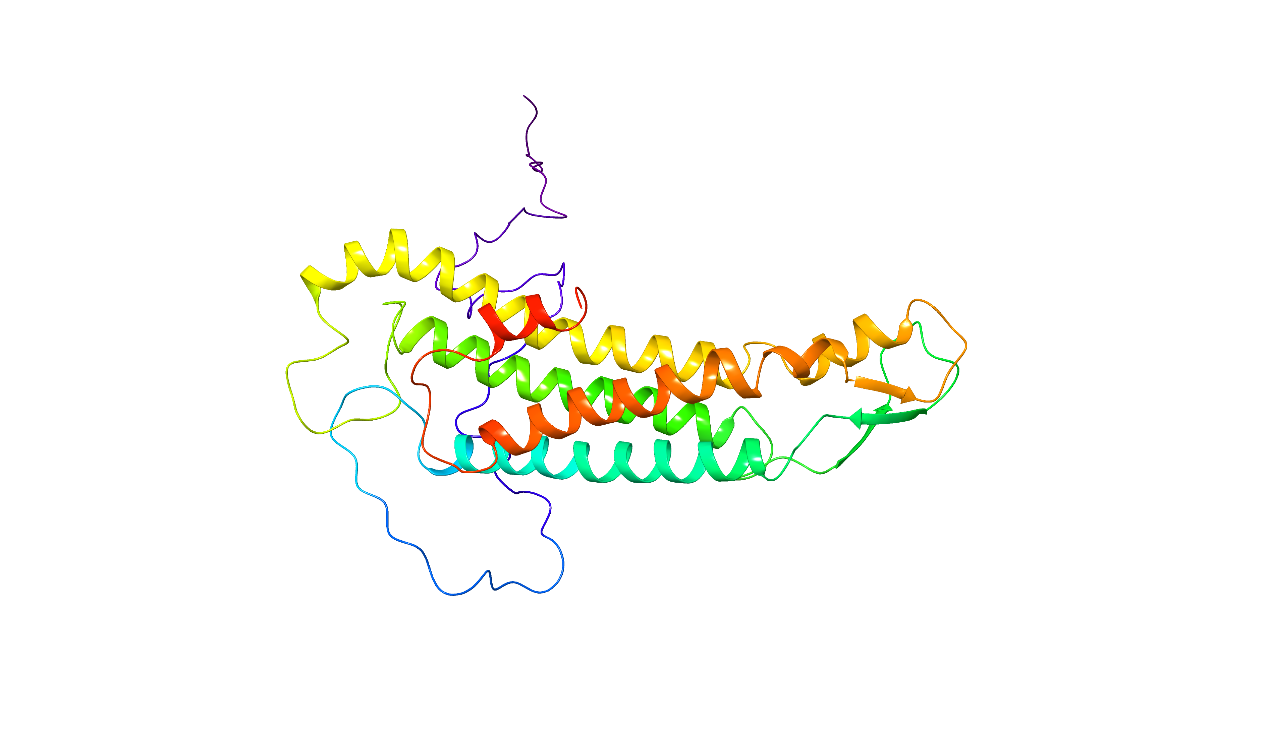


**Figure S2**. The structure of GJB1 from SWISS-MODEL.

**Supplementary tables:**

**Table S1**. The Differently expressed genes between Hela-GJB1 and Control.

| Symbol | logFC | logCPM | PValue | FDR |
| --- | --- | --- | --- | --- |
| PCDH17 | -14.3583 | 5.332101 | 0 | 0 |
| HENMT1 | -13.363 | 4.327273 | 0 | 0 |
| LYPD6B | -13.124 | 4.085975 | 0 | 0 |
| COL8A1 | -13.0047 | 3.963261 | 0 | 0 |
| ITK | -12.9238 | 3.883179 | 0 | 0 |
| HPDL | -12.8695 | 3.829423 | 0 | 0 |
| SDR16C5 | -12.8535 | 3.812057 | 0 | 0 |
| T | -12.6804 | 3.636781 | 0 | 0 |
| SMIM10 | -12.6603 | 3.61316 | 0 | 0 |
| GPR183 | -12.6035 | 3.559514 | 0 | 0 |
| WFDC1 | -12.3089 | 6.7467 | 0 | 0 |
| MAGEA3 | -12.1823 | 4.956239 | 0 | 0 |
| CTB-102L5.4 | -12.0815 | 6.517353 | 0 | 0 |
| IGFBP7 | -12.0745 | 6.807427 | 0 | 0 |
| GRAMD1B | -11.9755 | 6.954474 | 0 | 0 |
| KRT81 | -11.8536 | 10.13113 | 0 | 0 |
| MAGEA6 | -11.8514 | 5.407151 | 0 | 0 |
| FZD10 | -11.7163 | 5.270094 | 0 | 0 |
| NNMT | -11.7 | 7.636433 | 0 | 0 |
| SPINK4 | -11.5978 | 4.364878 | 0 | 0 |
| PDE7B | -11.5761 | 4.344252 | 0 | 0 |
| RNF212 | -11.5518 | 4.31845 | 0 | 0 |
| MCTP2 | -11.4928 | 5.045045 | 0 | 0 |
| PTPRM | -11.4925 | 5.046468 | 0 | 0 |
| ARMCX2 | -11.4421 | 4.99364 | 0 | 0 |
| SORBS2 | -11.3762 | 4.927539 | 0 | 0 |
| FSTL4 | -11.3749 | 7.801534 | 0 | 0 |
| SCARA5 | -11.3439 | 7.157002 | 0 | 0 |
| GDA | -11.33 | 5.387687 | 0 | 0 |
| CD44 | -11.3091 | 7.121217 | 0 | 0 |
| KRT7 | -11.3015 | 8.156473 | 0 | 0 |
| KRT17 | -11.2744 | 9.764709 | 0 | 0 |
| CGA | -11.2585 | 9.921271 | 0 | 0 |
| LY6K | -11.2524 | 7.298952 | 0 | 0 |
| COL4A1 | -11.2316 | 7.278618 | 0 | 0 |
| BASP1 | -11.1911 | 8.474139 | 0 | 0 |
| KRT86 | -11.1868 | 5.242164 | 0 | 0 |
| GAL | -11.1575 | 6.973017 | 0 | 0 |
| HTATIP2 | -11.1413 | 6.116352 | 0 | 0 |
| COL4A2 | -11.136 | 8.049482 | 0 | 0 |
| FOXF1 | -11.12 | 5.175391 | 0 | 0 |
| LGALS3 | -11.0586 | 6.245616 | 0 | 0 |
| P4HTM | -11.0554 | 4.604372 | 0 | 0 |
| KRT80 | -11.054 | 6.58632 | 0 | 0 |
| GAGE2A | -11.0434 | 6.229002 | 0 | 0 |
| ALPP | -11.0028 | 7.048344 | 0 | 0 |
| C8orf4 | -10.9853 | 5.038809 | 0 | 0 |
| EFEMP1 | -10.9826 | 7.408102 | 0 | 0 |
| NOV | -10.9282 | 3.687809 | 0 | 0 |
| PXDN | -10.911 | 7.158524 | 0 | 0 |
| CT83 | -10.8965 | 4.442781 | 0 | 0 |
| PRSS21 | -10.859 | 6.39215 | 0 | 0 |
| IL6 | -10.8586 | 5.58538 | 0 | 0 |
| HTRA1 | -10.8567 | 6.901699 | 0 | 0 |
| ASS1 | -10.8245 | 9.502449 | 0 | 0 |
| FOLR1 | -10.7974 | 9.544658 | 0 | 0 |
| PDE2A | -10.7659 | 7.998162 | 0 | 0 |
| PRKCDBP | -10.7529 | 4.808725 | 0 | 0 |
| GNG11 | -10.735 | 7.242731 | 0 | 0 |
| SULF2 | -10.6888 | 6.500922 | 0 | 0 |
| BTBD6 | -10.6521 | 4.201206 | 0 | 0 |
| FAM127C | -10.6446 | 4.189595 | 0 | 0 |
| MFAP2 | -10.6436 | 6.013253 | 0 | 0 |
| SLPI | -10.6358 | 7.662462 | 0 | 0 |
| CPS1 | -10.5717 | 9.300152 | 0 | 0 |
| CHRNA9 | -10.5459 | 4.086405 | 0 | 0 |
| CBR1 | -10.5152 | 5.699812 | 0 | 0 |
| MMP2 | -10.5132 | 5.880838 | 0 | 0 |
| HTRA3 | -10.4612 | 5.434759 | 0 | 0 |
| CDCA7L | -10.4371 | 4.861657 | 0 | 0 |
| ENG | -10.4239 | 5.396469 | 0 | 0 |
| PDE3A | -10.3988 | 5.368906 | 0 | 0 |
| SPOCK1 | -10.3414 | 5.063119 | 0 | 0 |
| COL16A1 | -10.3381 | 5.864805 | 0 | 0 |
| SLC12A3 | -10.2972 | 4.343725 | 0 | 0 |
| DIO2 | -10.2339 | 3.770879 | 0 | 0 |
| SNCA | -10.2291 | 3.766684 | 0 | 0 |
| IGFBP4 | -10.2114 | 6.715769 | 0 | 0 |
| CSAG1 | -10.2096 | 4.932629 | 0 | 0 |
| RHOD | -10.1812 | 4.227605 | 0 | 0 |
| OCIAD2 | -10.1444 | 4.866584 | 0 | 0 |
| FABP5 | -10.1155 | 6.618204 | 0 | 0 |
| LPL | -10.1111 | 4.533963 | 0 | 0 |
| MAGEA1 | -10.033 | 4.455133 | 0 | 0 |
| MEST | -10.0235 | 5.387943 | 0 | 0 |
| MCAM | -10.0105 | 6.732201 | 0 | 0 |
| KYNU | -9.99396 | 6.573051 | 0 | 0 |
| WLS | -9.96915 | 5.14738 | 0 | 0 |
| ZNF512 | -9.95626 | 4.000669 | 0 | 0 |
| GPRC5A | -9.94741 | 6.734538 | 0 | 0 |
| STRA6 | -9.91393 | 4.333342 | 0 | 0 |
| DAB2 | -9.91021 | 4.627543 | 0 | 0 |
| THEM4 | -9.90944 | 3.950871 | 0 | 0 |
| PCSK9 | -9.90815 | 5.272974 | 0 | 0 |
| PBX1 | -9.87481 | 4.590968 | 0 | 0 |
| CD248 | -9.86835 | 5.794703 | 0 | 0 |
| CD36 | -9.85943 | 3.900915 | 0 | 0 |
| FBN1 | -9.81504 | 5.175619 | 0 | 0 |
| P3H2 | -9.80311 | 4.979511 | 0 | 0 |
| CXCR4 | -9.79677 | 5.72496 | 0 | 0 |
| MGST1 | -9.79512 | 5.158428 | 0 | 0 |
| NR3C1 | -9.75594 | 4.721822 | 0 | 0 |
| CDK6 | -9.73118 | 5.258841 | 0 | 0 |
| AR | -9.72532 | 3.762757 | 0 | 0 |
| BDNF | -9.67302 | 3.714801 | 0 | 0 |
| CYBA | -9.67124 | 7.803726 | 0 | 0 |
| MYO10 | -9.6592 | 5.901795 | 0 | 0 |
| LRRC61 | -9.65766 | 5.021645 | 0 | 0 |
| IGFBP5 | -9.64691 | 5.003818 | 0 | 0 |
| TCEAL8 | -9.59135 | 4.556553 | 0 | 0 |
| MAGEA12 | -9.5839 | 4.001868 | 0 | 0 |
| L1CAM | -9.56356 | 6.411662 | 0 | 0 |
| ADARB2 | -9.54322 | 4.257435 | 0 | 0 |
| ALDH3B1 | -9.4655 | 5.708298 | 0 | 0 |
| ABLIM3 | -9.46193 | 5.701842 | 0 | 0 |
| PRSS23 | -9.45704 | 7.858216 | 0 | 0 |
| TGM2 | -9.41335 | 8.847667 | 0 | 0 |
| MLH1 | -9.37696 | 4.338754 | 0 | 0 |
| ANPEP | -9.36251 | 4.325635 | 0 | 0 |
| LAMB3 | -9.32876 | 4.502063 | 0 | 0 |
| WISP2 | -9.28269 | 4.950123 | 0 | 0 |
| RARRES2 | -9.25553 | 5.40069 | 0 | 0 |
| IRX3 | -9.22994 | 5.152707 | 0 | 0 |
| OLFM1 | -9.16318 | 8.576337 | 0 | 0 |
| MALL | -9.15493 | 3.563436 | 0 | 0 |
| GSTM3 | -9.1321 | 6.361006 | 0 | 0 |
| CAV2 | -9.07431 | 4.42786 | 0 | 0 |
| CD24 | -9.07203 | 6.436115 | 0 | 0 |
| GLMP | -9.04857 | 4.977315 | 0 | 0 |
| CLMP | -8.88723 | 3.841619 | 0 | 0 |
| ZNF544 | -8.84839 | 4.018874 | 0 | 0 |
| CADM1 | -8.77206 | 4.127544 | 0 | 0 |
| HSPB1 | -8.77017 | 8.093781 | 0 | 0 |
| CD55 | -8.73493 | 7.929308 | 0 | 0 |
| PMEPA1 | -8.73059 | 6.535745 | 0 | 0 |
| TNS4 | -8.62112 | 6.717513 | 0 | 0 |
| TNS3 | -8.57573 | 4.241443 | 0 | 0 |
| C6orf223 | -8.56511 | 4.231386 | 0 | 0 |
| DPYSL3 | -8.53786 | 4.053872 | 0 | 0 |
| S100A16 | -8.52475 | 7.037005 | 0 | 0 |
| C8orf22 | -8.40998 | 4.819794 | 0 | 0 |
| TFPI2 | -8.33541 | 4.976244 | 0 | 0 |
| CDC42EP1 | -8.31443 | 5.858311 | 0 | 0 |
| CDA | -8.30393 | 5.321182 | 0 | 0 |
| NEURL1 | -8.27734 | 3.931723 | 0 | 0 |
| GLUL | -8.27407 | 6.183292 | 0 | 0 |
| ANTXR1 | -8.27073 | 6.51372 | 0 | 0 |
| WIPF1 | -8.25667 | 4.899458 | 0 | 0 |
| EVA1C | -8.21256 | 3.720529 | 0 | 0 |
| CH507-42P11.8 | -8.18718 | 5.026755 | 0 | 0 |
| PTGS2 | -8.10322 | 5.73416 | 0 | 0 |
| RUNX3 | -8.07568 | 5.672813 | 0 | 0 |
| DUSP23 | -8.03387 | 4.810225 | 0 | 0 |
| MSLN | -8.03359 | 3.952381 | 0 | 0 |
| STC1 | -8.03269 | 3.938262 | 0 | 0 |
| COL4A6 | -8.02 | 4.427712 | 0 | 0 |
| EHD2 | -8.00049 | 6.123917 | 0 | 0 |
| OPN3 | -7.95953 | 3.613866 | 0 | 0 |
| OSBPL10 | -7.90755 | 5.222527 | 0 | 0 |
| ZNF503 | -7.9003 | 5.12157 | 0 | 0 |
| ABCC3 | -7.87021 | 4.281808 | 0 | 0 |
| MISP | -7.86277 | 5.958925 | 0 | 0 |
| PYCR1 | -7.84053 | 6.065147 | 0 | 0 |
| LTBR | -7.83503 | 5.736239 | 0 | 0 |
| S100A4 | -7.74806 | 9.215195 | 0 | 0 |
| CYB5A | -7.73054 | 4.305043 | 0 | 0 |
| RBPMS | -7.63922 | 4.132237 | 0 | 0 |
| UNC13D | -7.63443 | 5.526953 | 0 | 0 |
| MGLL | -7.59544 | 3.72225 | 0 | 0 |
| TIMP3 | -7.55851 | 3.884148 | 0 | 0 |
| C9orf64 | -7.54362 | 3.671377 | 0 | 0 |
| CRIP1 | -7.50501 | 7.39877 | 0 | 0 |
| ACTL8 | -7.47045 | 4.178146 | 0 | 0 |
| WNT5A | -7.46752 | 4.780828 | 0 | 0 |
| HR | -7.4459 | 4.664498 | 0 | 0 |
| SNCG | -7.34372 | 6.90608 | 0 | 0 |
| EPAS1 | -7.34234 | 7.025054 | 0 | 0 |
| FOXP1 | -7.2535 | 3.81812 | 0 | 0 |
| SPINK6 | -7.22011 | 5.55105 | 0 | 0 |
| SELENBP1 | -7.2174 | 4.234363 | 0 | 0 |
| PDE4B | -7.20437 | 3.83758 | 0 | 0 |
| SMOC1 | -7.18347 | 7.661713 | 0 | 0 |
| LMO7 | -7.182 | 5.67988 | 0 | 0 |
| SLC1A3 | -7.18043 | 5.852526 | 0 | 0 |
| COL7A1 | -7.17914 | 7.373122 | 0 | 0 |
| DSEL | -7.16988 | 4.385342 | 0 | 0 |
| SLC38A5 | -7.1393 | 5.544953 | 0 | 0 |
| IGFBP2 | -7.08992 | 5.862513 | 0 | 0 |
| HSPA1A | -7.06312 | 4.54399 | 0 | 0 |
| TGFA | -7.01952 | 4.03134 | 0 | 0 |
| RASIP1 | -6.90386 | 6.693362 | 0 | 0 |
| KCNN4 | -6.88553 | 4.722152 | 0 | 0 |
| IGFBP3 | -6.81567 | 5.010297 | 0 | 0 |
| CAPG | -6.77573 | 6.458996 | 0 | 0 |
| ANXA3 | -6.72676 | 4.202672 | 0 | 0 |
| SRGN | -6.71996 | 5.073151 | 0 | 0 |
| IAH1 | -6.70383 | 3.71522 | 0 | 0 |
| MCF2L | -6.68958 | 5.605737 | 0 | 0 |
| FOXF2 | -6.57626 | 4.130889 | 0 | 0 |
| ARHGAP23 | -6.56307 | 5.60509 | 0 | 0 |
| INPP1 | -6.55149 | 4.591234 | 0 | 0 |
| TMTC1 | -6.47312 | 4.615301 | 0 | 0 |
| S100A2 | -6.45591 | 7.026515 | 0 | 0 |
| SGK1 | -6.43346 | 6.72913 | 0 | 0 |
| GPC5 | -6.15971 | 4.497076 | 0 | 0 |
| IFITM1 | -6.02563 | 7.035648 | 0 | 0 |
| STX16-NPEPL1 | -6.01346 | 4.184054 | 0 | 0 |
| IL20RB | -6.00942 | 4.893875 | 0 | 0 |
| COL5A1 | -5.99858 | 6.979881 | 0 | 0 |
| ALPL | -5.96073 | 7.10594 | 0 | 0 |
| NDRG1 | -5.85174 | 6.142358 | 0 | 0 |
| IGF1R | -5.73354 | 5.418756 | 0 | 0 |
| CYP2S1 | -5.72701 | 6.029158 | 0 | 0 |
| AQP3 | -5.63115 | 6.553999 | 0 | 0 |
| IFITM2 | -5.52468 | 7.709945 | 0 | 0 |
| SGCE | -5.47822 | 4.005225 | 0 | 0 |
| ALDH2 | -5.46281 | 4.275335 | 0 | 0 |
| DUSP1 | -5.27275 | 7.792267 | 0 | 0 |
| TOR4A | -5.13989 | 4.804724 | 0 | 0 |
| SERPINE2 | -5.06951 | 5.601519 | 0 | 0 |
| PPL | -5.06256 | 4.287522 | 0 | 0 |
| VWA5A | -5.05529 | 5.803458 | 0 | 0 |
| SFN | -5.01861 | 5.314183 | 0 | 0 |
| AXL | -4.98403 | 6.342354 | 0 | 0 |
| LAMC3 | -4.983 | 4.837963 | 0 | 0 |
| CSRP1 | -4.97788 | 7.396649 | 0 | 0 |
| BCAR3 | -4.94813 | 5.960207 | 0 | 0 |
| NR2F2 | -4.94795 | 4.268111 | 0 | 0 |
| FAM107B | -4.94323 | 6.047525 | 0 | 0 |
| ST3GAL1 | -4.88857 | 4.341466 | 0 | 0 |
| MYC | -4.79574 | 7.741572 | 0 | 0 |
| PLA2G4A | -4.73276 | 5.564758 | 0 | 0 |
| DUSP4 | -4.70028 | 5.1743 | 0 | 0 |
| CDKN2A | -4.69386 | 8.605768 | 0 | 0 |
| PODXL2 | -4.68847 | 6.613649 | 0 | 0 |
| MICAL2 | -4.66835 | 4.820549 | 0 | 0 |
| MOCOS | -4.66511 | 6.552197 | 0 | 0 |
| PERP | -4.59319 | 8.235564 | 0 | 0 |
| VASN | -4.5719 | 4.458584 | 0 | 0 |
| HLA-A | -4.55219 | 7.310635 | 0 | 0 |
| PPP1R14B | -4.52038 | 7.920334 | 0 | 0 |
| SLC39A6 | -4.49137 | 7.062524 | 0 | 0 |
| PTGES | -4.48067 | 7.163621 | 0 | 0 |
| PCOLCE | -4.46094 | 7.793908 | 0 | 0 |
| PC | -4.46026 | 5.490789 | 0 | 0 |
| NUAK1 | -4.39395 | 4.621366 | 0 | 0 |
| TRABD2A | -4.35117 | 5.052252 | 0 | 0 |
| PEG10 | -4.29994 | 5.872792 | 0 | 0 |
| SLC7A5 | -4.20009 | 9.572872 | 0 | 0 |
| ARHGEF16 | -4.15442 | 6.613527 | 0 | 0 |
| MET | -4.12582 | 4.973492 | 0 | 0 |
| TSC22D1 | -4.09203 | 7.214926 | 0 | 0 |
| RAB31 | -4.07742 | 7.842618 | 0 | 0 |
| TBC1D2 | -4.06972 | 5.13936 | 0 | 0 |
| CKB | -4.03426 | 8.67102 | 0 | 0 |
| PHLDA1 | -4.03422 | 7.116567 | 0 | 0 |
| METRNL | -4.02282 | 7.557839 | 0 | 0 |
| KIF26A | -3.96982 | 5.831936 | 0 | 0 |
| RASA3 | -3.92067 | 5.001688 | 0 | 0 |
| PROCR | -3.89925 | 5.024123 | 0 | 0 |
| ITGA3 | -3.88379 | 6.743168 | 0 | 0 |
| TNFAIP2 | -3.85809 | 5.482041 | 0 | 0 |
| KIFC3 | -3.82823 | 6.153851 | 0 | 0 |
| KSR1 | -3.7357 | 5.515591 | 0 | 0 |
| PLCD3 | -3.66907 | 7.38153 | 0 | 0 |
| TUBA4A | -3.65889 | 6.863728 | 0 | 0 |
| FTH1 | -3.62655 | 12.8562 | 0 | 0 |
| S100A10 | -3.56145 | 7.370545 | 0 | 0 |
| BAG1 | -3.49203 | 7.327129 | 0 | 0 |
| ETS2 | -3.47316 | 5.703035 | 0 | 0 |
| PLAU | -3.46798 | 5.498186 | 0 | 0 |
| FAM129B | -3.45085 | 8.052139 | 0 | 0 |
| PCID2 | -3.36229 | 6.629743 | 0 | 0 |
| ANKH | -3.35668 | 7.021602 | 0 | 0 |
| SLC7A2 | -3.34942 | 5.178361 | 0 | 0 |
| ELP2 | -3.2382 | 6.748723 | 0 | 0 |
| FOS | -3.1975 | 6.688337 | 0 | 0 |
| DDIT4 | -3.18488 | 9.080079 | 0 | 0 |
| OSMR | -3.15176 | 5.762154 | 0 | 0 |
| FSCN1 | -3.10277 | 7.643853 | 0 | 0 |
| TRIP13 | -3.07471 | 6.977561 | 0 | 0 |
| TFRC | -3.02174 | 6.977489 | 0 | 0 |
| COL12A1 | -3.01673 | 5.666938 | 0 | 0 |
| TXNIP | -3.01547 | 6.740616 | 0 | 0 |
| AVPI1 | -2.98707 | 7.322906 | 0 | 0 |
| IL11 | -2.95031 | 5.55634 | 0 | 0 |
| EGFR | -2.93134 | 5.574729 | 0 | 0 |
| ERGIC1 | -2.79382 | 7.865056 | 0 | 0 |
| SFXN3 | -2.75876 | 6.530685 | 0 | 0 |
| IER2 | -2.71663 | 8.263231 | 0 | 0 |
| IER3 | -2.68661 | 7.702299 | 0 | 0 |
| FHL2 | -2.63834 | 7.225899 | 0 | 0 |
| CLU | -2.6226 | 9.283 | 0 | 0 |
| SLC3A2 | -2.5062 | 8.950737 | 0 | 0 |
| CTSC | -2.47836 | 7.616828 | 2.96439387504748e-323 | 1.01283457397456e-321 |
| DRAM1 | -2.5332 | 6.00898 | 1.13635098543487e-321 | 3.8665577443536e-320 |
| NT5E | -10.606 | 3.362534 | 5.90062600828201e-320 | 1.98975057549645e-318 |
| P2RX5-TAX1BP3 | -5.80017 | 3.915776 | 1.02716247770395e-319 | 3.4559793113466e-318 |
| PHLDA2 | -3.17704 | 6.08314 | 3.83332688901431e-318 | 1.28689041620759e-316 |
| PDLIM1 | -6.61614 | 4.373598 | 9.23909872268431e-317 | 3.09479078303016e-315 |
| NAPRT | -5.79805 | 4.856807 | 1.91385426629541e-315 | 6.38247161180858e-314 |
| AHRR | -3.8679 | 4.571463 | 8.82356534484043e-315 | 2.93607052124916e-313 |
| TMX4 | -8.38553 | 3.332616 | 1.38175579689754e-311 | 4.5182218233184e-310 |
| FYN | -2.61563 | 6.297249 | 4.90026011195566e-310 | 0 |
| LCMT2 | -7.33831 | 3.359359 | 5.84763727610339e-310 | 0 |
| SLCO4A1 | -3.39386 | 6.581698 | 0 | 5.4E-308 |
| TRIM47 | -6.97556 | 3.996854 | 0 | 5.5E-308 |
| 43891 | -8.1766 | 3.337018 | 0 | 3.5E-307 |
| MAT2A | -2.47672 | 8.017967 | 0 | 4.4E-307 |
| PLEKHG4 | -9.39073 | 3.431109 | 2.3E-308 | 7.4E-307 |
| C8orf33 | -2.35091 | 6.772537 | 2E-307 | 6.3E-306 |
| RHOBTB1 | -8.59888 | 3.304456 | 3.4E-305 | 1.1E-303 |
| PLAUR | -2.78429 | 6.113553 | 5E-305 | 1.6E-303 |
| GAGE1 | -7.61529 | 3.640902 | 8.4E-305 | 2.6E-303 |
| TFAP2A | -5.97149 | 4.18843 | 1.1E-304 | 3.3E-303 |
| RAB20 | -3.71899 | 4.833125 | 2.9E-304 | 9E-303 |
| LINC00116 | -7.94234 | 3.736882 | 3.3E-302 | 1E-300 |
| SNX7 | -5.45252 | 3.652471 | 4.8E-302 | 1.5E-300 |
| MYO1E | -2.4745 | 6.538639 | 8.5E-302 | 2.6E-300 |
| KLF5 | -9.74533 | 5.893473 | 2.3E-301 | 7.1E-300 |
| NEGR1 | -9.32237 | 4.279401 | 4.9E-300 | 1.5E-298 |
| COBL | -2.76551 | 5.252763 | 5.3E-300 | 1.6E-298 |
| HOXC11 | -10.4726 | 3.22638 | 2.2E-299 | 6.7E-298 |
| DMBT1 | -8.06449 | 3.85648 | 2.6E-299 | 7.9E-298 |
| SNX19 | -10.021 | 3.550954 | 4.9E-299 | 1.5E-297 |
| ADARB1 | -2.74509 | 5.270355 | 8E-299 | 2.4E-297 |
| SSH3 | -6.1639 | 4.023443 | 1.2E-298 | 3.6E-297 |
| BIRC7 | -6.82582 | 3.786226 | 4.2E-298 | 1.3E-296 |
| MAP7 | -5.81316 | 5.018853 | 2.1E-296 | 6.2E-295 |
| NR4A1 | -2.76181 | 6.230512 | 1.6E-294 | 4.6E-293 |
| FOXQ1 | -8.86545 | 3.581757 | 1.4E-293 | 4.1E-292 |
| MAFK | -2.50346 | 5.924785 | 1.6E-293 | 4.7E-292 |
| MPV17L | -6.59488 | 3.807741 | 3.2E-293 | 9.4E-292 |
| B4GALT1 | -2.49997 | 7.94333 | 3.8E-293 | 1.1E-291 |
| FMNL1 | -2.89161 | 6.545119 | 2.5E-292 | 7.4E-291 |
| AMIGO2 | -5.70497 | 3.971713 | 1.5E-290 | 4.3E-289 |
| COL1A1 | -3.83395 | 4.770178 | 2.2E-289 | 6.5E-288 |
| C16orf45 | -4.8366 | 3.843136 | 3.3E-289 | 9.5E-288 |
| JUNB | -2.64099 | 8.491214 | 8.1E-288 | 2.3E-286 |
| TGFB1I1 | -9.157 | 3.567524 | 3.7E-286 | 1.1E-284 |
| AIFM2 | -4.14222 | 4.20269 | 4.3E-286 | 1.2E-284 |
| KCNK1 | -10.5999 | 3.357729 | 2.6E-285 | 7.5E-284 |
| SLC35G2 | -10.4742 | 3.227666 | 1E-284 | 2.9E-283 |
| RPRM | -8.26755 | 3.620174 | 1.8E-284 | 5E-283 |
| NCOR2 | -2.58985 | 6.594253 | 3.6E-284 | 1E-282 |
| STAT5A | -7.56438 | 3.215661 | 4.2E-284 | 1.2E-282 |
| PTGS1 | -9.62389 | 3.152758 | 4.9E-284 | 1.4E-282 |
| SLC6A15 | -12.5457 | 3.500128 | 3E-283 | 8.6E-282 |
| RIMS1 | -9.18658 | 3.2189 | 5.3E-283 | 1.5E-281 |
| SPECC1 | -2.33848 | 6.577151 | 1.4E-280 | 4E-279 |
| RPL37 | -2.59539 | 12.43455 | 2.9E-280 | 8E-279 |
| CARD14 | -8.85476 | 3.564586 | 3.9E-280 | 1.1E-278 |
| KDELC1 | -3.28069 | 4.823337 | 4.1E-280 | 1.1E-278 |
| PARP12 | -9.21953 | 3.253704 | 7.7E-280 | 2.1E-278 |
| FKBP11 | -3.81384 | 4.696799 | 8.3E-280 | 2.3E-278 |
| MARCKS | -8.29229 | 5.421487 | 1.6E-279 | 4.5E-278 |
| F2RL3 | -8.43841 | 3.141994 | 2.2E-279 | 6E-278 |
| ARMCX3 | -10.109 | 3.641254 | 5.9E-277 | 1.6E-275 |
| ARAP3 | -12.2827 | 3.230764 | 7.9E-276 | 2.1E-274 |
| CDKN1A | -3.24374 | 5.626671 | 1.8E-275 | 5E-274 |
| IPO5 | -2.2056 | 7.733327 | 2.2E-274 | 6E-273 |
| PRTFDC1 | -12.6368 | 3.596795 | 8.7E-274 | 2.3E-272 |
| FAM83G | -7.89571 | 3.406648 | 1.2E-273 | 3.1E-272 |
| OSBP2 | -2.79867 | 5.680462 | 1.8E-273 | 4.8E-272 |
| GDF15 | -4.19996 | 5.804662 | 3.6E-273 | 9.7E-272 |
| SLC17A9 | -7.29726 | 3.710843 | 2.3E-272 | 6.1E-271 |
| STAC | -12.4268 | 3.384174 | 1.9E-271 | 5.2E-270 |
| CCT5 | -2.12458 | 9.618859 | 2.4E-271 | 6.4E-270 |
| CPM | -4.0674 | 4.80134 | 4.8E-271 | 1.3E-269 |
| STMN3 | -2.98303 | 5.213082 | 9.9E-271 | 2.6E-269 |
| ADGRE2 | -7.18279 | 3.090274 | 4.3E-269 | 1.1E-267 |
| MT2A | -3.53735 | 8.390913 | 4.9E-269 | 1.3E-267 |
| ST3GAL4 | -2.97251 | 5.650852 | 1.3E-267 | 3.5E-266 |
| IRAK2 | -3.57552 | 4.645547 | 1.8E-267 | 4.8E-266 |
| P2RX5 | -8.21237 | 3.561275 | 2E-266 | 5.2E-265 |
| SLC16A6 | -3.96051 | 5.359337 | 1.7E-265 | 4.3E-264 |
| TSPAN31 | -4.43721 | 3.755256 | 5.3E-265 | 1.4E-263 |
| PLEK2 | -9.49599 | 3.028466 | 1.7E-264 | 4.3E-263 |
| SEMA3A | -12.4026 | 3.352464 | 1.3E-263 | 3.4E-262 |
| SVIP | -7.21521 | 3.530149 | 4.7E-263 | 1.2E-261 |
| LAMP1 | -2.29096 | 7.799218 | 7.1E-263 | 1.8E-261 |
| DES | -7.92689 | 3.269983 | 1E-262 | 2.6E-261 |
| SEMA3B | -2.76371 | 5.732968 | 3.2E-262 | 8.2E-261 |
| MOB3B | -12.0338 | 2.98294 | 6.9E-262 | 1.8E-260 |
| JMJD8 | -4.08239 | 4.87888 | 1.6E-261 | 4.2E-260 |
| BTBD3 | -2.97061 | 6.162941 | 1.9E-261 | 4.9E-260 |
| FHOD3 | -9.42093 | 2.948727 | 2.5E-260 | 6.4E-259 |
| ADAM12 | -12.248 | 3.193809 | 6.7E-259 | 1.7E-257 |
| HSPB8 | -4.97581 | 3.982884 | 2.1E-258 | 5.2E-257 |
| ME3 | -9.69508 | 3.228732 | 2.1E-258 | 5.3E-257 |
| SDHA | -2.18934 | 8.11866 | 3.4E-258 | 8.5E-257 |
| GRAMD3 | -10.9529 | 3.708506 | 1.3E-257 | 3.3E-256 |
| RIMKLB | -3.63025 | 4.833239 | 9.3E-257 | 2.3E-255 |
| UBAC2 | -2.34362 | 6.204067 | 1.1E-256 | 2.7E-255 |
| SERPINB5 | -12.1494 | 3.101975 | 2E-255 | 4.8E-254 |
| EVPL | -7.27716 | 3.061043 | 3.2E-255 | 7.8E-254 |
| TMEM2 | -4.16279 | 3.861533 | 4.5E-255 | 1.1E-253 |
| CD82 | -2.78117 | 5.117734 | 5E-255 | 1.2E-253 |
| TGFB2 | -12.4634 | 3.413686 | 2.9E-254 | 7.1E-253 |
| TREX1 | -4.4443 | 3.988813 | 7.9E-254 | 1.9E-252 |
| NLRP1 | -8.26721 | 3.213961 | 1E-253 | 2.5E-252 |
| CXCL8 | -9.54304 | 3.073328 | 8.3E-252 | 2E-250 |
| CUL4A | -2.45954 | 6.723575 | 9.6E-252 | 2.3E-250 |
| ITPRIP | -2.6349 | 6.304409 | 1.8E-251 | 4.4E-250 |
| GALNT2 | -2.36102 | 7.815746 | 8E-251 | 1.9E-249 |
| LMO2 | -4.3557 | 3.723024 | 2.1E-250 | 5E-249 |
| CYFIP2 | -2.40273 | 6.287024 | 3.6E-250 | 8.7E-249 |
| NABP1 | -4.76556 | 3.60787 | 6.3E-250 | 1.5E-248 |
| AHR | -9.49973 | 3.9099 | 5.7E-249 | 1.4E-247 |
| SOX4 | -3.17504 | 6.115043 | 6.1E-248 | 1.5E-246 |
| TMPRSS3 | -9.41805 | 2.948567 | 1.2E-247 | 2.9E-246 |
| WWC1 | -2.3033 | 5.651675 | 2.9E-247 | 6.9E-246 |
| THRA | -2.34082 | 5.715536 | 3.4E-246 | 8E-245 |
| ADGRG1 | -5.8378 | 3.191002 | 2.1E-245 | 5E-244 |
| ARID5B | -8.63885 | 3.043541 | 1.1E-244 | 2.7E-243 |
| CXXC5 | -2.66199 | 5.121882 | 1.4E-243 | 3.3E-242 |
| MT1E | -7.55276 | 3.971278 | 2.4E-243 | 5.7E-242 |
| TSHZ2 | -8.06846 | 3.408269 | 3E-243 | 7.1E-242 |
| PRRX2 | -9.59951 | 3.132507 | 5.4E-242 | 1.3E-240 |
| IFI16 | -8.34788 | 3.044793 | 1.2E-240 | 2.8E-239 |
| SLC16A3 | -2.71317 | 8.249656 | 9.3E-239 | 2.1E-237 |
| FAT1 | -2.67284 | 5.006901 | 1.1E-238 | 2.6E-237 |
| COL15A1 | -9.29087 | 2.821026 | 1.5E-238 | 3.3E-237 |
| PSMB8 | -6.14706 | 3.107046 | 9.1E-238 | 2.1E-236 |
| PRR5L | -5.47765 | 3.529763 | 3.3E-237 | 7.6E-236 |
| INF2 | -2.57828 | 6.458677 | 4.6E-237 | 1E-235 |
| PSCA | -6.76439 | 4.029441 | 1E-236 | 2.3E-235 |
| IMPA2 | -2.29472 | 7.167141 | 1.1E-236 | 2.5E-235 |
| ADAL | -8.18381 | 2.880161 | 4.9E-236 | 1.1E-234 |
| PCDH7 | -5.09353 | 3.552739 | 8.4E-236 | 1.9E-234 |
| PAQR5 | -3.91351 | 3.873446 | 2.4E-235 | 5.4E-234 |
| ZNF22 | -6.76147 | 2.882987 | 3.3E-235 | 7.5E-234 |
| MFSD12 | -2.61953 | 7.221586 | 4.7E-235 | 1.1E-233 |
| NAA11 | -9.24531 | 2.775854 | 2.8E-233 | 6.2E-232 |
| SH3GL2 | -11.966 | 2.911087 | 6E-233 | 1.3E-231 |
| B3GNT9 | -4.14273 | 3.645714 | 8.7E-233 | 1.9E-231 |
| FBN2 | -7.28935 | 3.077998 | 1.4E-232 | 3.1E-231 |
| MYOCD | -9.00025 | 3.035183 | 1.5E-232 | 3.4E-231 |
| BLMH | -2.11123 | 6.680935 | 2.5E-232 | 5.6E-231 |
| FOXC2 | -12.0999 | 3.044956 | 2.2E-231 | 4.8E-230 |
| CSGALNACT1 | -6.28615 | 3.504403 | 2.4E-230 | 5.3E-229 |
| CHCHD7 | -2.25918 | 5.533769 | 1.7E-229 | 3.8E-228 |
| ANKRD10 | -2.94916 | 4.424273 | 4.9E-227 | 1.1E-225 |
| LYPD6 | -11.8013 | 2.747931 | 5.7E-227 | 1.2E-225 |
| KRT10 | -2.17947 | 7.19152 | 1.3E-226 | 2.9E-225 |
| SYNPO | -3.8184 | 4.212758 | 7.6E-226 | 1.6E-224 |
| LRIG1 | -4.66706 | 3.451524 | 1.1E-224 | 2.4E-223 |
| MEGF6 | -5.2643 | 3.477023 | 2E-224 | 4.3E-223 |
| KRT18 | -2.17129 | 9.234057 | 5.6E-224 | 1.2E-222 |
| ITGB2 | -7.36941 | 2.706323 | 7.3E-224 | 1.6E-222 |
| ZNF469 | -7.83757 | 2.788629 | 1.5E-223 | 3.2E-222 |
| SUV39H1 | -3.74645 | 4.327559 | 1.2E-222 | 2.5E-221 |
| ARHGAP18 | -8.01036 | 3.525737 | 3.5E-222 | 7.3E-221 |
| FAM155A | -9.47518 | 3.506613 | 5E-222 | 1.1E-220 |
| FBXO4 | -2.76172 | 4.740282 | 1.2E-221 | 2.5E-220 |
| COL25A1 | -11.9972 | 2.949249 | 1.5E-221 | 3.1E-220 |
| KLF13 | -2.28189 | 5.79565 | 2.5E-221 | 5.2E-220 |
| UBE2E2 | -5.35967 | 3.168195 | 1.4E-220 | 3E-219 |
| TDRD9 | -11.8276 | 2.77538 | 3.4E-220 | 7.1E-219 |
| SLC12A8 | -9.09256 | 2.617613 | 7.9E-220 | 1.6E-218 |
| DSP | -2.35391 | 5.169537 | 1.6E-219 | 3.4E-218 |
| SLCO3A1 | -6.65027 | 2.770359 | 2.2E-218 | 4.6E-217 |
| ECEL1 | -3.60191 | 4.72674 | 5.3E-218 | 1.1E-216 |
| CPVL | -9.29201 | 2.824863 | 5.9E-218 | 1.2E-216 |
| STAT3 | -2.21487 | 6.93194 | 4.4E-217 | 9.1E-216 |
| STS | -4.47336 | 3.292643 | 1E-216 | 2.1E-215 |
| ALDH3A1 | -8.28522 | 2.68963 | 1.2E-216 | 2.5E-215 |
| DNER | -11.8259 | 2.773553 | 3.2E-216 | 6.6E-215 |
| CCRL2 | -6.98638 | 3.301308 | 3.7E-216 | 7.6E-215 |
| COLGALT1 | -2.1045 | 7.968245 | 9.2E-216 | 1.9E-214 |
| LAMA5 | -2.73573 | 6.506783 | 1.5E-215 | 3E-214 |
| DUSP10 | -5.21425 | 3.788167 | 2.4E-215 | 4.8E-214 |
| CDH2 | -5.29223 | 3.255655 | 2.1E-214 | 4.3E-213 |
| NRP2 | -5.09565 | 3.163537 | 5.1E-214 | 1E-212 |
| PPAP2C | -2.89363 | 5.936407 | 1.5E-213 | 2.9E-212 |
| SH2D2A | -2.31841 | 5.810659 | 1.7E-213 | 3.4E-212 |
| PLOD2 | -7.98091 | 4.111999 | 1.8E-213 | 3.7E-212 |
| ZIC2 | -4.87813 | 3.183237 | 2.6E-213 | 5.2E-212 |
| ASB9 | -9.48354 | 3.016737 | 3E-213 | 6E-212 |
| HORMAD1 | -11.6442 | 2.588401 | 3.3E-213 | 6.6E-212 |
| FJX1 | -3.94012 | 3.845728 | 6.2E-213 | 1.2E-211 |
| EPB41L4A | -5.69388 | 2.907418 | 6.5E-213 | 1.3E-211 |
| GABRA3 | -9.92139 | 2.673335 | 1.3E-212 | 2.5E-211 |
| BDH1 | -6.90505 | 2.816558 | 2.7E-212 | 5.4E-211 |
| AKAP12 | -3.37458 | 5.082276 | 7.8E-212 | 1.5E-210 |
| MLKL | -2.6551 | 4.682614 | 3.4E-211 | 6.6E-210 |
| KRT8 | -5.51194 | 9.25082 | 1.4E-210 | 2.7E-209 |
| CLTCL1 | -2.97697 | 5.09346 | 1.5E-210 | 3E-209 |
| DNAJC12 | -5.77016 | 2.838825 | 5E-210 | 9.6E-209 |
| CXCL1 | -12.1167 | 3.063128 | 6E-210 | 1.2E-208 |
| MB21D1 | -7.61052 | 2.950415 | 4.7E-209 | 9E-208 |
| TRIM16L | -3.01439 | 4.748519 | 5.8E-209 | 1.1E-207 |
| TMEM97 | -2.00194 | 6.435557 | 9.1E-209 | 1.8E-207 |
| KCNK15 | -10.338 | 3.09164 | 2.1E-208 | 4E-207 |
| EPS8L2 | -4.3576 | 3.695743 | 5.7E-208 | 1.1E-206 |
| CDKN1C | -2.31712 | 5.117332 | 9.9E-208 | 1.9E-206 |
| FERMT1 | -5.07949 | 3.075617 | 1.1E-207 | 2.1E-206 |
| DNMBP | -2.82945 | 4.604685 | 2.6E-207 | 4.9E-206 |
| TMEM158 | -2.66138 | 5.703139 | 1.8E-206 | 3.3E-205 |
| MGST2 | -5.0357 | 4.199888 | 2.4E-206 | 4.5E-205 |
| BMP6 | -6.6778 | 2.900889 | 3.8E-206 | 7.3E-205 |
| GLP2R | -11.5692 | 2.515171 | 1.8E-204 | 3.5E-203 |
| C10orf2 | -2.25971 | 5.011272 | 8.4E-204 | 1.6E-202 |
| RIN2 | -11.6783 | 2.623849 | 1.8E-203 | 3.4E-202 |
| MORC4 | -7.83892 | 2.538574 | 1.9E-202 | 3.5E-201 |
| PITPNC1 | -2.19483 | 5.531785 | 4E-202 | 7.5E-201 |
| ADM2 | -6.66582 | 2.685443 | 5.2E-202 | 9.6E-201 |
| PDE1A | -8.08216 | 2.48471 | 1.1E-201 | 2.1E-200 |
| MAPRE2 | -4.9808 | 3.172428 | 3.4E-201 | 6.2E-200 |
| PODNL1 | -5.76082 | 3.24631 | 6.1E-201 | 1.1E-199 |
| MN1 | -8.4908 | 2.90239 | 4.6E-199 | 8.4E-198 |
| RPL27 | -2.08322 | 11.59987 | 4.8E-199 | 8.9E-198 |
| ECE1 | -2.16183 | 6.269629 | 5.3E-199 | 9.7E-198 |
| HNMT | -8.24079 | 2.643391 | 2.4E-198 | 4.4E-197 |
| EXOC3 | -2.17676 | 6.327392 | 2.5E-198 | 4.6E-197 |
| WDTC1 | -3.45491 | 4.133981 | 6.5E-198 | 1.2E-196 |
| DNM1 | -3.20363 | 4.68633 | 1.2E-197 | 2.2E-196 |
| LRFN4 | -2.04226 | 6.220881 | 6.1E-197 | 1.1E-195 |
| SRD5A1 | -2.75284 | 5.318605 | 7.8E-197 | 1.4E-195 |
| MSX1 | -5.51563 | 3.409491 | 8.8E-197 | 1.6E-195 |
| AGMAT | -5.96613 | 2.984373 | 1.2E-196 | 2.1E-195 |
| TMEM173 | -7.45727 | 2.96332 | 5.9E-196 | 1.1E-194 |
| SYBU | -7.51702 | 2.466206 | 1.4E-195 | 2.6E-194 |
| CRTC3 | -2.11752 | 6.083021 | 2.6E-195 | 4.6E-194 |
| NAV2 | -6.38882 | 3.020322 | 4E-195 | 7.1E-194 |
| EXOSC5 | -2.16062 | 5.831703 | 6.7E-195 | 1.2E-193 |
| MGAT5B | -3.92092 | 4.087451 | 2.7E-194 | 4.8E-193 |
| TFAP2C | -7.57448 | 2.722415 | 3.2E-194 | 5.7E-193 |
| LUM | -7.88526 | 3.390531 | 6.6E-194 | 1.2E-192 |
| SORT1 | -2.7833 | 4.67475 | 9.8E-193 | 1.7E-191 |
| LENG9 | -6.2457 | 2.734178 | 7.4E-192 | 1.3E-190 |
| ITGA2 | -3.88596 | 3.409951 | 1.2E-191 | 2.1E-190 |
| PCNXL2 | -7.26961 | 2.429054 | 1.2E-191 | 2.2E-190 |
| SLC36A4 | -8.44069 | 2.471492 | 1.4E-191 | 2.5E-190 |
| FUT4 | -11.475 | 2.415427 | 3.4E-191 | 5.9E-190 |
| LYPLAL1 | -11.7516 | 2.697797 | 1.4E-190 | 2.4E-189 |
| ITGB4 | -3.1173 | 4.380967 | 1.5E-190 | 2.6E-189 |
| SECTM1 | -4.23011 | 3.32872 | 3.2E-190 | 5.5E-189 |
| GRIN2D | -5.16458 | 3.037332 | 1.2E-189 | 2.2E-188 |
| NRP1 | -6.95622 | 2.464076 | 5.8E-188 | 9.9E-187 |
| TSPAN1 | -7.34927 | 2.697195 | 1.9E-187 | 3.1E-186 |
| COX6B2 | -4.35792 | 3.414491 | 4.6E-187 | 7.7E-186 |
| TNFRSF10A | -7.08157 | 2.422034 | 5.5E-186 | 9.2E-185 |
| MTCL1 | -3.18492 | 4.630114 | 1.1E-185 | 1.8E-184 |
| PLAC8 | -3.85404 | 3.303808 | 1.2E-185 | 2E-184 |
| KANK2 | -2.09737 | 5.228188 | 1.3E-185 | 2.2E-184 |
| C12orf54 | -11.361 | 2.305076 | 1.6E-185 | 2.6E-184 |
| VIPR2 | -6.24214 | 2.724404 | 1.8E-185 | 3E-184 |
| COL9A3 | -4.56168 | 3.033233 | 2.3E-185 | 3.9E-184 |
| SIK2 | -2.04069 | 5.532258 | 4E-185 | 6.6E-184 |
| FOXL1 | -8.02635 | 2.424538 | 3.5E-183 | 5.8E-182 |
| EMC10 | -2.19399 | 7.092405 | 9.4E-183 | 1.5E-181 |
| KCNJ18 | -11.3471 | 2.289043 | 1E-182 | 1.7E-181 |
| DNAJA4 | -8.86801 | 2.397954 | 1.2E-181 | 2E-180 |
| CPZ | -6.44934 | 2.571736 | 2.9E-181 | 4.8E-180 |
| TIMP4 | -11.334 | 2.274739 | 3.6E-181 | 5.9E-180 |
| AHNAK2 | -2.1323 | 4.959349 | 5.5E-181 | 9E-180 |
| PODXL | -4.81424 | 3.307022 | 2.7E-180 | 4.3E-179 |
| DMD | -7.86181 | 3.20914 | 6.2E-180 | 1E-178 |
| GABRE | -9.76178 | 2.51331 | 6.7E-180 | 1.1E-178 |
| ITPR1 | -3.47117 | 4.499226 | 1.2E-179 | 2E-178 |
| PTK6 | -5.24205 | 3.084897 | 1.5E-179 | 2.4E-178 |
| SH3TC1 | -6.18416 | 2.89796 | 4.3E-179 | 6.8E-178 |
| OSBPL7 | -6.82328 | 2.738908 | 5.4E-179 | 8.6E-178 |
| RGS16 | -3.43423 | 3.51933 | 5.5E-179 | 8.7E-178 |
| NHS | -10.3653 | 3.115719 | 6.5E-179 | 1E-177 |
| PLAGL1 | -6.4971 | 2.806727 | 7.5E-179 | 1.2E-177 |
| SLC22A4 | -6.92136 | 2.428402 | 1.6E-178 | 2.5E-177 |
| FAM134B | -11.5974 | 2.539843 | 2.3E-177 | 3.7E-176 |
| CCNJL | -4.97826 | 2.656621 | 1.3E-176 | 2.1E-175 |
| MECOM | -11.9518 | 2.89218 | 1.6E-176 | 2.6E-175 |
| CCNA1 | -8.55559 | 2.588681 | 1.7E-176 | 2.6E-175 |
| SIPA1L2 | -7.56966 | 2.265258 | 8E-176 | 1.2E-174 |
| MITF | -5.00948 | 2.944824 | 6.3E-175 | 9.9E-174 |
| MED12 | -3.45234 | 3.913397 | 6.4E-174 | 9.9E-173 |
| CDYL2 | -3.1249 | 3.855466 | 6.5E-173 | 1E-171 |
| RCCD1 | -2.13059 | 5.129256 | 2.8E-172 | 4.3E-171 |
| RND3 | -9.48286 | 2.229288 | 3.3E-172 | 5E-171 |
| ENOX1 | -9.43566 | 2.180462 | 2.8E-171 | 4.3E-170 |
| ZNF300 | -11.7038 | 2.657421 | 1.1E-170 | 1.7E-169 |
| FAM105A | -3.9978 | 3.037778 | 2.1E-170 | 3.2E-169 |
| TCEAL3 | -6.47455 | 2.381245 | 3.4E-170 | 5.1E-169 |
| RUNX2 | -7.10651 | 2.610072 | 4.1E-170 | 6.3E-169 |
| NPEPL1 | -5.75868 | 2.839109 | 6.1E-170 | 9.3E-169 |
| PRKX | -2.07179 | 5.340134 | 1.2E-169 | 1.8E-168 |
| CAV1 | -2.52937 | 5.042225 | 1.3E-169 | 2E-168 |
| SMAD2 | -2.0277 | 5.954323 | 3.5E-169 | 5.3E-168 |
| ZDHHC6 | -2.10917 | 4.793627 | 2.8E-168 | 4.2E-167 |
| GTF2IRD1 | -2.08629 | 5.980682 | 6.6E-168 | 9.9E-167 |
| DUSP5 | -2.1772 | 4.824751 | 1.2E-167 | 1.8E-166 |
| SPINK5 | -8.3515 | 2.375789 | 1.6E-167 | 2.4E-166 |
| PMAIP1 | -6.339 | 2.738691 | 2.1E-167 | 3.2E-166 |
| PRKAA2 | -7.1716 | 3.083082 | 2.7E-167 | 4.1E-166 |
| LDAH | -8.68608 | 2.214846 | 3.1E-167 | 4.5E-166 |
| LIMCH1 | -2.81158 | 5.815912 | 1.4E-166 | 2.1E-165 |
| MDFIC | -9.18274 | 3.213447 | 2.2E-166 | 3.2E-165 |
| NETO2 | -2.75681 | 4.3227 | 2.7E-166 | 4E-165 |
| ENOSF1 | -2.23362 | 5.143249 | 4.7E-166 | 6.8E-165 |
| SOX7 | -5.36461 | 2.771135 | 9.3E-166 | 1.4E-164 |
| SSFA2 | -4.34692 | 4.76369 | 4.4E-165 | 6.5E-164 |
| SLC9A3R2 | -2.09746 | 6.183841 | 4.7E-165 | 6.9E-164 |
| CDKN2B | -2.94176 | 3.917657 | 5.9E-165 | 8.7E-164 |
| ESRP2 | -6.10819 | 2.339454 | 6.1E-165 | 8.9E-164 |
| KLF7 | -8.17489 | 2.200197 | 1.5E-164 | 2.2E-163 |
| ETS1 | -9.08879 | 2.617901 | 2.5E-164 | 3.6E-163 |
| NFRKB | -2.1031 | 4.788424 | 6.9E-164 | 1E-162 |
| RGMB | -4.71725 | 2.716223 | 7.6E-164 | 1.1E-162 |
| HSD17B2 | -8.58162 | 2.104678 | 1.5E-163 | 2.1E-162 |
| EPM2AIP1 | -11.3215 | 2.264392 | 1.5E-163 | 2.2E-162 |
| HOXA10 | -3.70157 | 3.361674 | 7.8E-163 | 1.1E-161 |
| EFNA1 | -2.46601 | 4.655209 | 8.7E-163 | 1.2E-161 |
| HS6ST2 | -9.3366 | 2.86543 | 6.8E-162 | 9.8E-161 |
| ABTB2 | -4.15653 | 3.206576 | 2.7E-161 | 3.8E-160 |
| HDAC4 | -2.71201 | 4.070442 | 5.7E-161 | 8.1E-160 |
| RHOV | -2.5071 | 4.576708 | 1.4E-160 | 2E-159 |
| BACE1 | -2.51376 | 4.919382 | 3.7E-160 | 5.2E-159 |
| ZNF785 | -6.77275 | 2.280042 | 1.7E-159 | 2.4E-158 |
| CXCL2 | -11.5277 | 2.470175 | 5.9E-159 | 8.4E-158 |
| KIAA1644 | -8.11437 | 2.520015 | 8.2E-159 | 1.2E-157 |
| PRKCE | -2.8646 | 3.886585 | 1.1E-158 | 1.5E-157 |
| ROR2 | -3.78583 | 3.123263 | 1.5E-158 | 2.2E-157 |
| DPPA2 | -8.65757 | 2.18889 | 2.2E-158 | 3.1E-157 |
| SLC12A7 | -2.00598 | 5.745557 | 6.4E-158 | 8.9E-157 |
| UQCC1 | -2.14813 | 5.203375 | 7.1E-158 | 9.9E-157 |
| SH2D3A | -4.17743 | 3.337664 | 8.9E-158 | 1.2E-156 |
| TBX3 | -6.73562 | 2.518933 | 4.9E-155 | 6.8E-154 |
| TSPAN18 | -3.98382 | 3.078828 | 1E-154 | 1.4E-153 |
| BICC1 | -6.89608 | 2.053272 | 1.1E-154 | 1.5E-153 |
| SOX17 | -9.27047 | 2.017383 | 1.4E-154 | 2E-153 |
| SLFN5 | -3.22852 | 3.84409 | 9E-154 | 1.2E-152 |
| SGK223 | -3.94361 | 3.21113 | 1.8E-153 | 2.4E-152 |
| SLC43A3 | -7.15913 | 2.10591 | 1.9E-153 | 2.5E-152 |
| CUL9 | -6.80098 | 2.313914 | 3.5E-153 | 4.7E-152 |
| CRIM1 | -4.46701 | 3.916387 | 9.2E-153 | 1.2E-151 |
| ZNF532 | -11.0735 | 2.012572 | 2.5E-152 | 3.3E-151 |
| TRABD2B | -4.31519 | 2.701382 | 1E-151 | 1.4E-150 |
| RAB42 | -5.85047 | 2.173002 | 1.3E-151 | 1.8E-150 |
| MLLT3 | -5.118 | 2.348245 | 4.2E-151 | 5.7E-150 |
| HYAL1 | -4.91382 | 2.804109 | 9.3E-151 | 1.2E-149 |
| MATK | -2.86006 | 4.347313 | 9.6E-151 | 1.3E-149 |
| C15orf52 | -4.92601 | 2.546027 | 9.7E-151 | 1.3E-149 |
| SLC7A11 | -2.37377 | 5.375469 | 3.5E-150 | 4.7E-149 |
| ABCG1 | -4.984 | 2.564966 | 3.9E-150 | 5.2E-149 |
| TRIM29 | -9.54491 | 2.288752 | 1.3E-149 | 1.7E-148 |
| SCARB1 | -2.07233 | 6.968675 | 2.4E-149 | 3.2E-148 |
| HRH1 | -9.22348 | 1.97101 | 5.7E-149 | 7.5E-148 |
| RUNX1 | -6.57571 | 2.086303 | 5.9E-149 | 7.9E-148 |
| HEG1 | -2.24394 | 4.5043 | 1.2E-148 | 1.6E-147 |
| PDCD4 | -2.3358 | 5.625447 | 1.2E-148 | 1.6E-147 |
| PPP2R2B | -7.20706 | 1.904761 | 4.2E-148 | 5.5E-147 |
| IRS1 | -6.06566 | 2.292669 | 1.2E-147 | 1.6E-146 |
| KLHL35 | -9.69559 | 2.454625 | 1.3E-147 | 1.7E-146 |
| TYMP | -4.09723 | 3.250652 | 8.1E-147 | 1E-145 |
| SSTR1 | -9.12228 | 1.871457 | 1.5E-146 | 2E-145 |
| DTNA | -6.19139 | 1.979674 | 6.6E-146 | 8.5E-145 |
| FRAT2 | -2.18234 | 4.956777 | 1.1E-145 | 1.4E-144 |
| BCL6B | -6.21538 | 2.437441 | 2.2E-145 | 2.8E-144 |
| GRB10 | -2.02786 | 4.970405 | 3.6E-145 | 4.6E-144 |
| CALD1 | -2.29001 | 7.272204 | 7.3E-145 | 9.4E-144 |
| TGFBR3 | -4.03388 | 2.996453 | 1.3E-144 | 1.7E-143 |
| ZBED6CL | -7.74217 | 2.156834 | 2E-144 | 2.6E-143 |
| MEF2C | -8.89269 | 2.417957 | 2.4E-144 | 3.1E-143 |
| PKP3 | -2.65585 | 4.227215 | 3.7E-144 | 4.8E-143 |
| SNAP25 | -10.9125 | 1.854351 | 4.8E-144 | 6.1E-143 |
| GLT8D2 | -3.32333 | 3.662468 | 6.4E-144 | 8.2E-143 |
| IL18 | -4.63619 | 2.401412 | 1.2E-143 | 1.5E-142 |
| SIAE | -2.85332 | 4.249645 | 2.6E-142 | 3.3E-141 |
| FABP3 | -8.3293 | 1.856756 | 3.3E-142 | 4.2E-141 |
| MYO1G | -8.36831 | 2.409877 | 8.8E-142 | 1.1E-140 |
| SLC44A1 | -2.04468 | 5.531949 | 1E-141 | 1.3E-140 |
| HMHA1 | -2.82137 | 4.350604 | 1E-141 | 1.3E-140 |
| UGT8 | -5.65473 | 2.136105 | 1.7E-141 | 2.2E-140 |
| AMOTL1 | -2.19344 | 4.558689 | 3.8E-141 | 4.8E-140 |
| RBM20 | -7.85043 | 1.876136 | 7.6E-141 | 9.4E-140 |
| CCND3 | -2.00523 | 7.130738 | 1.7E-140 | 2.1E-139 |
| MIB2 | -2.17743 | 5.219499 | 5.1E-140 | 6.4E-139 |
| TANC2 | -2.37567 | 4.22062 | 3.8E-139 | 4.6E-138 |
| JPH3 | -3.64389 | 2.907933 | 4.3E-139 | 5.2E-138 |
| CD109 | -4.42853 | 3.277252 | 4.8E-139 | 5.9E-138 |
| IQCJ-SCHIP1 | -4.18137 | 2.579534 | 5.6E-139 | 6.9E-138 |
| CA9 | -4.08176 | 3.220296 | 9E-138 | 1.1E-136 |
| PHLDB2 | -9.79951 | 3.839042 | 1.1E-137 | 1.4E-136 |
| TMEM184A | -3.60325 | 3.163996 | 1.6E-137 | 1.9E-136 |
| KIAA1217 | -8.26359 | 1.786904 | 1.9E-137 | 2.4E-136 |
| CLYBL | -3.14347 | 3.230145 | 2.2E-137 | 2.6E-136 |
| FOXC1 | -2.2779 | 4.914561 | 4.1E-137 | 4.9E-136 |
| PXMP4 | -5.52291 | 2.083789 | 2.4E-136 | 2.8E-135 |
| FAM109B | -5.26757 | 2.177533 | 3.5E-136 | 4.3E-135 |
| WNT7B | -5.21959 | 2.495747 | 7.5E-136 | 8.9E-135 |
| NPTXR | -4.32377 | 2.618952 | 7.7E-136 | 9.2E-135 |
| RP11-385D13.1 | -3.23925 | 3.186628 | 1.1E-135 | 1.3E-134 |
| HCN2 | -2.62312 | 4.942591 | 2.6E-135 | 3.1E-134 |
| TESC | -2.84595 | 3.439842 | 2.8E-135 | 3.4E-134 |
| PRDM1 | -5.28501 | 2.51422 | 3.7E-135 | 4.4E-134 |
| METTL7A | -4.22694 | 3.112662 | 6.3E-135 | 7.5E-134 |
| SLFN12 | -7.38084 | 1.787866 | 8.5E-135 | 1E-133 |
| CYSLTR1 | -10.9267 | 1.874348 | 5.4E-134 | 6.3E-133 |
| TPD52L1 | -2.92146 | 3.410095 | 2.1E-133 | 2.5E-132 |
| DPYD | -6.8855 | 2.05176 | 2.5E-133 | 2.9E-132 |
| RP11-162P23.2 | -6.95329 | 2.119482 | 4E-133 | 4.6E-132 |
| MYD88 | -3.85226 | 2.667377 | 4.3E-133 | 5.1E-132 |
| IRS2 | -5.77011 | 2.658028 | 4.4E-133 | 5.2E-132 |
| PPM1H | -4.8584 | 2.500828 | 1.2E-132 | 1.3E-131 |
| KIAA1324L | -6.77166 | 2.28152 | 6.1E-132 | 7E-131 |
| BMP2 | -8.91366 | 1.661379 | 6.6E-132 | 7.6E-131 |
| LOX | -4.02804 | 2.864436 | 1.4E-131 | 1.6E-130 |
| NPAS2 | -2.47738 | 4.513414 | 1.4E-131 | 1.6E-130 |
| TOX | -8.46244 | 1.986568 | 1.5E-131 | 1.7E-130 |
| SMAP1 | -2.65163 | 3.891308 | 3.7E-131 | 4.2E-130 |
| PYROXD2 | -7.57951 | 1.990014 | 1.5E-130 | 1.8E-129 |
| EPDR1 | -7.27329 | 1.676972 | 2.2E-130 | 2.5E-129 |
| DSCR8 | -10.7797 | 1.726451 | 2.4E-130 | 2.8E-129 |
| CEP72 | -2.41115 | 4.284781 | 8.6E-130 | 9.8E-129 |
| MPPED2 | -7.23652 | 2.169102 | 1.2E-129 | 1.3E-128 |
| ADGRD1 | -7.47635 | 1.886402 | 1.3E-129 | 1.5E-128 |
| C8orf88 | -6.05621 | 2.083204 | 3.6E-129 | 4E-128 |
| PADI3 | -8.35423 | 1.886189 | 8.2E-129 | 9.2E-128 |
| TNK1 | -9.00063 | 1.745463 | 1.2E-128 | 1.3E-127 |
| SEMA3F | -2.23235 | 4.873985 | 1.4E-128 | 1.5E-127 |
| LPCAT2 | -4.26575 | 2.695409 | 1.7E-128 | 1.8E-127 |
| FAM83A | -7.82661 | 1.848838 | 1.7E-128 | 1.9E-127 |
| ZSCAN16 | -10.6574 | 1.602129 | 1.9E-127 | 2.1E-126 |
| RNF217 | -8.16254 | 2.179644 | 2E-127 | 2.2E-126 |
| NFIA | -3.13318 | 3.527019 | 2.2E-127 | 2.5E-126 |
| MBNL3 | -7.6491 | 2.824234 | 4.1E-127 | 4.6E-126 |
| PLA2R1 | -7.45074 | 1.854046 | 7.9E-127 | 8.7E-126 |
| ATXN1 | -7.60556 | 1.639737 | 9.1E-127 | 1E-125 |
| TLL1 | -7.69419 | 2.089289 | 1.5E-126 | 1.7E-125 |
| HES1 | -2.36933 | 6.217702 | 1.6E-125 | 1.7E-124 |
| MYPN | -8.27927 | 1.810175 | 3.3E-125 | 3.6E-124 |
| ENC1 | -5.23771 | 1.957276 | 5.7E-125 | 6.2E-124 |
| SH3RF3 | -2.32614 | 4.796405 | 9.2E-125 | 1E-123 |
| CLEC2B | -6.41526 | 1.766778 | 3.1E-124 | 3.3E-123 |
| A4GALT | -2.07615 | 4.608095 | 4.4E-124 | 4.8E-123 |
| MEI1 | -6.9467 | 2.107222 | 1.2E-123 | 1.3E-122 |
| SIM2 | -5.25092 | 1.969715 | 1.3E-123 | 1.4E-122 |
| PDLIM3 | -5.60232 | 2.497734 | 1.7E-123 | 1.8E-122 |
| TRIM16 | -2.64445 | 4.328004 | 2.2E-123 | 2.4E-122 |
| FAAH2 | -6.86899 | 1.812821 | 9.5E-123 | 1E-121 |
| PKP2 | -4.91895 | 2.000679 | 3.3E-122 | 3.5E-121 |
| TSKU | -2.00431 | 5.758039 | 3.4E-122 | 3.6E-121 |
| HOXD9 | -6.40685 | 1.570996 | 3.7E-121 | 3.9E-120 |
| EPPK1 | -4.08406 | 2.247727 | 1.5E-120 | 1.5E-119 |
| ANO4 | -8.02451 | 1.547129 | 2.7E-120 | 2.8E-119 |
| EFNB2 | -9.11508 | 1.864127 | 3.5E-120 | 3.6E-119 |
| CAMK2D | -7.92985 | 1.959978 | 4.6E-120 | 4.8E-119 |
| HBE1 | -8.6693 | 1.41876 | 6.3E-120 | 6.5E-119 |
| ELFN2 | -5.49857 | 1.908577 | 3.1E-119 | 3.2E-118 |
| MTRR | -2.27741 | 5.101313 | 4E-119 | 4.2E-118 |
| NFATC4 | -5.54728 | 1.685971 | 4.3E-119 | 4.5E-118 |
| PVRL3 | -8.92558 | 2.456839 | 5.2E-119 | 5.4E-118 |
| EPGN | -10.7494 | 1.696772 | 6.4E-119 | 6.6E-118 |
| ACKR3 | -10.8527 | 1.801901 | 7.3E-119 | 7.5E-118 |
| ELF3 | -3.32119 | 2.887047 | 1.3E-118 | 1.3E-117 |
| FA2H | -6.3057 | 2.101065 | 2.3E-118 | 2.4E-117 |
| ECHDC3 | -9.23633 | 1.989936 | 3E-118 | 3.1E-117 |
| SRGAP1 | -2.23014 | 4.185648 | 4.5E-118 | 4.6E-117 |
| ZNF783 | -2.79909 | 3.19905 | 1.5E-117 | 1.5E-116 |
| REPS2 | -5.26094 | 1.839791 | 1.5E-117 | 1.5E-116 |
| TENM3 | -6.08657 | 1.598677 | 4.3E-117 | 4.3E-116 |
| C4BPB | -6.83765 | 1.797561 | 4.7E-117 | 4.7E-116 |
| TINAGL1 | -6.22283 | 1.736202 | 6.1E-117 | 6.2E-116 |
| ADCK3 | -2.33386 | 4.129782 | 1.3E-116 | 1.4E-115 |
| BMP5 | -7.34448 | 1.378126 | 1.8E-116 | 1.8E-115 |
| ARNTL | -3.3633 | 2.940931 | 2.7E-116 | 2.7E-115 |
| NTSR1 | -7.14175 | 1.842169 | 5.6E-116 | 5.6E-115 |
| CARD16 | -7.03487 | 2.398904 | 6.5E-116 | 6.4E-115 |
| AFAP1L1 | -2.54055 | 3.594618 | 1.4E-115 | 1.4E-114 |
| TRPM2 | -7.39398 | 1.796615 | 2.7E-115 | 2.7E-114 |
| KLRC2 | -8.77206 | 1.522922 | 4.9E-115 | 4.9E-114 |
| GPR176 | -9.23468 | 1.982901 | 5.8E-115 | 5.7E-114 |
| PPARGC1A | -10.5 | 1.447879 | 1.5E-114 | 1.5E-113 |
| FST | -5.68676 | 2.642274 | 3.6E-114 | 3.6E-113 |
| SLC18A2 | -10.8256 | 1.759089 | 7.1E-114 | 7E-113 |
| LAMA3 | -5.15942 | 2.011972 | 7.2E-114 | 7.1E-113 |
| TFAP4 | -2.22297 | 4.285909 | 1.2E-113 | 1.2E-112 |
| PALMD | -7.93811 | 1.470093 | 1.6E-113 | 1.6E-112 |
| FAM102B | -2.13524 | 4.490555 | 2.3E-113 | 2.3E-112 |
| CRLF1 | -2.62825 | 4.872485 | 3.1E-113 | 3.1E-112 |
| VAV1 | -5.09918 | 2.18469 | 3.6E-113 | 3.5E-112 |
| HSPA2 | -5.31576 | 1.730811 | 4.6E-113 | 4.5E-112 |
| P4HA3 | -4.4057 | 2.027406 | 5.7E-113 | 5.6E-112 |
| KRT16 | -8.6673 | 1.420638 | 5.6E-112 | 5.4E-111 |
| TWIST1 | -5.57433 | 1.907807 | 1.8E-111 | 1.7E-110 |
| ZNF671 | -8.00379 | 1.530322 | 7.5E-111 | 7.2E-110 |
| HSPG2 | -2.12937 | 5.42166 | 3.4E-110 | 3.3E-109 |
| HERC3 | -2.21903 | 4.212368 | 4.5E-110 | 4.3E-109 |
| KCNMB4 | -3.01057 | 2.815243 | 7.6E-110 | 7.3E-109 |
| C10orf11 | -6.22324 | 1.573523 | 1.1E-109 | 1.1E-108 |
| KLF9 | -2.26445 | 4.297356 | 1.8E-109 | 1.8E-108 |
| ZP3 | -2.23873 | 4.467091 | 2.1E-109 | 2E-108 |
| PDE8B | -6.29955 | 2.214283 | 2.9E-109 | 2.8E-108 |
| INHBE | -3.52778 | 2.420734 | 5E-109 | 4.8E-108 |
| RSPO3 | -8.70169 | 1.444129 | 5.1E-109 | 4.9E-108 |
| ACAD8 | -2.42944 | 3.645226 | 9.6E-109 | 9.1E-108 |
| ARSG | -2.97272 | 2.983478 | 1E-108 | 9.9E-108 |
| COL4A5 | -2.05411 | 4.608861 | 1.2E-108 | 1.1E-107 |
| SLC25A24 | -3.77862 | 3.209186 | 1.2E-108 | 1.1E-107 |
| CD9 | -2.36979 | 5.636565 | 2.7E-108 | 2.6E-107 |
| CXCL3 | -10.7228 | 1.662366 | 3.5E-108 | 3.3E-107 |
| DDN | -3.46424 | 2.923949 | 5.4E-108 | 5.1E-107 |
| GPR156 | -10.6362 | 1.589112 | 7.6E-108 | 7.2E-107 |
| F2RL1 | -3.28783 | 2.611563 | 1.5E-107 | 1.4E-106 |
| FASTKD3 | -2.1569 | 3.888134 | 1.8E-107 | 1.7E-106 |
| FAM81A | -3.6245 | 2.631331 | 3E-107 | 2.8E-106 |
| NKD2 | -2.00293 | 4.511748 | 7.9E-107 | 7.4E-106 |
| MYEOV | -5.66589 | 1.589444 | 1.1E-106 | 9.9E-106 |
| SLC1A1 | -3.0032 | 2.902493 | 3.1E-106 | 2.8E-105 |
| DOCK9 | -3.68895 | 2.695963 | 3.8E-106 | 3.5E-105 |
| FAM50B | -10.4195 | 1.365796 | 7.5E-106 | 6.9E-105 |
| EGFLAM | -8.31472 | 1.841281 | 8.9E-106 | 8.1E-105 |
| GJB3 | -10.7907 | 1.724151 | 1E-105 | 9.1E-105 |
| CD302 | -8.92989 | 1.682494 | 1.3E-105 | 1.2E-104 |
| ARSJ | -7.66096 | 1.193668 | 1.4E-105 | 1.3E-104 |
| DKK3 | -7.53694 | 1.577551 | 5.8E-105 | 5.3E-104 |
| KLF12 | -7.33599 | 1.369967 | 6.5E-105 | 5.9E-104 |
| CREG2 | -7.76771 | 1.29937 | 1.7E-104 | 1.6E-103 |
| PDGFRB | -4.79157 | 1.771746 | 2.1E-104 | 1.9E-103 |
| PTP4A1 | -2.31806 | 8.013315 | 1.1E-103 | 9.5E-103 |
| IRX5 | -6.8005 | 1.212744 | 1.6E-103 | 1.4E-102 |
| INSL4 | -8.74288 | 1.494618 | 2.1E-103 | 1.8E-102 |
| MT1F | -8.44852 | 1.199493 | 3.8E-103 | 3.4E-102 |
| SESN3 | -5.18435 | 1.958029 | 8.4E-103 | 7.5E-102 |
| SATB2 | -5.65439 | 1.675352 | 9.5E-103 | 8.5E-102 |
| ITGA1 | -5.42983 | 1.473352 | 2.2E-102 | 1.9E-101 |
| BAMBI | -5.23224 | 1.479492 | 3E-102 | 2.7E-101 |
| FCMR | -6.81025 | 1.224863 | 5.4E-102 | 4.8E-101 |
| TBC1D4 | -2.48994 | 3.895527 | 7E-102 | 6.2E-101 |
| MLK4 | -7.57827 | 1.600192 | 1.1E-101 | 1E-100 |
| C1QTNF1 | -7.16431 | 1.203686 | 1.6E-101 | 1.4E-100 |
| NYNRIN | -7.63897 | 1.177249 | 1.6E-99 | 1.41E-98 |
| EPHA7 | -5.65535 | 1.687125 | 6.2E-99 | 5.34E-98 |
| ULK2 | -7.69143 | 1.217978 | 7E-99 | 5.97E-98 |
| CYP1B1 | -3.58001 | 4.248992 | 9.6E-99 | 8.22E-98 |
| LGALS12 | -10.1863 | 1.136227 | 1.01E-98 | 8.64E-98 |
| MMRN2 | -4.73678 | 1.470953 | 1.81E-98 | 1.55E-97 |
| SLC30A1 | -2.99256 | 4.643104 | 2.13E-98 | 1.81E-97 |
| ARHGEF33 | -10.3934 | 1.328428 | 6.29E-98 | 5.35E-97 |
| PPP3CA | -3.26226 | 4.443557 | 6.94E-98 | 5.9E-97 |
| TSPAN12 | -5.78751 | 2.097481 | 7.21E-98 | 6.12E-97 |
| PID1 | -10.1641 | 1.109313 | 7.43E-98 | 6.31E-97 |
| PAPPA | -8.61154 | 1.354335 | 8.03E-98 | 6.8E-97 |
| HOXA3 | -4.48148 | 1.689781 | 2.67E-97 | 2.25E-96 |
| TRPS1 | -4.76796 | 2.178804 | 5.35E-97 | 4.5E-96 |
| NINJ2 | -7.16615 | 1.211479 | 2.64E-96 | 2.21E-95 |
| VEGFC | -6.11476 | 1.461112 | 3.04E-96 | 2.54E-95 |
| PCED1B | -4.52114 | 1.720395 | 3.04E-96 | 2.54E-95 |
| TUSC1 | -2.09267 | 4.046609 | 3.66E-96 | 3.07E-95 |
| TMEM139 | -5.36125 | 1.690143 | 4.08E-96 | 3.41E-95 |
| NTRK1 | -5.12324 | 1.709801 | 7.65E-96 | 6.37E-95 |
| AP1S2 | -3.19607 | 3.631633 | 1.63E-95 | 1.35E-94 |
| TGFBR3L | -7.11645 | 2.067891 | 2.89E-95 | 2.39E-94 |
| ARTN | -4.50231 | 1.926895 | 3.22E-95 | 2.65E-94 |
| CA2 | -10.1469 | 1.09551 | 7.59E-95 | 6.25E-94 |
| PLCB4 | -10.2243 | 1.172622 | 3.13E-94 | 2.57E-93 |
| TRIM59 | -6.50883 | 1.212268 | 3.34E-94 | 2.73E-93 |
| SKAP2 | -2.83811 | 3.086273 | 3.59E-94 | 2.94E-93 |
| IQCA1 | -8.29691 | 1.053833 | 4.39E-94 | 3.59E-93 |
| ARHGEF4 | -2.91316 | 3.058349 | 5.76E-94 | 4.7E-93 |
| EDIL3 | -9.21864 | 3.249937 | 3.8E-93 | 3.09E-92 |
| PAN2 | -2.34967 | 3.607974 | 3.87E-93 | 3.14E-92 |
| PTGER4 | -8.82849 | 1.568027 | 6.4E-93 | 5.18E-92 |
| EYA1 | -8.47995 | 1.230683 | 9.16E-93 | 7.41E-92 |
| TEAD1 | -2.02452 | 5.511067 | 2.26E-92 | 1.82E-91 |
| ONECUT2 | -4.55691 | 2.163992 | 2.31E-92 | 1.86E-91 |
| PPAP2B | -7.80832 | 1.351517 | 5.36E-92 | 4.3E-91 |
| MPZL2 | -3.35429 | 2.530268 | 1.91E-91 | 1.52E-90 |
| MKX | -8.17466 | 1.707885 | 6.8E-91 | 5.4E-90 |
| CABLES1 | -2.3573 | 3.446458 | 1.49E-90 | 1.18E-89 |
| KHDC1 | -10.3995 | 1.35101 | 3.45E-90 | 2.72E-89 |
| LUZP2 | -7.42311 | 1.458075 | 5.34E-90 | 4.19E-89 |
| ACTC1 | -8.19332 | 0.951915 | 6.78E-90 | 5.32E-89 |
| KLRC3 | -8.21922 | 0.974369 | 1.1E-89 | 8.58E-89 |
| PAPSS2 | -3.42887 | 2.794751 | 2.73E-89 | 2.13E-88 |
| KIAA0040 | -2.75143 | 3.125952 | 5.57E-89 | 4.34E-88 |
| TNFRSF21 | -2.58224 | 3.373283 | 8.25E-89 | 6.41E-88 |
| ONECUT3 | -5.36833 | 1.17752 | 9.72E-89 | 7.55E-88 |
| EDNRA | -10.6413 | 1.576667 | 1.01E-88 | 7.8E-88 |
| MCF2 | -10.0555 | 0.999943 | 5.23E-88 | 4.03E-87 |
| LRRC8E | -7.09684 | 1.141972 | 8.18E-88 | 6.3E-87 |
| LGALS9B | -10.1228 | 1.062076 | 1.96E-87 | 1.5E-86 |
| DIS3 | -2.00263 | 4.47248 | 2.09E-87 | 1.6E-86 |
| ZIC5 | -3.61886 | 1.911251 | 2.35E-87 | 1.8E-86 |
| S100A3 | -4.25199 | 1.818226 | 2.42E-87 | 1.85E-86 |
| GAS6 | -2.15748 | 4.73064 | 4.78E-87 | 3.65E-86 |
| DIAPH3 | -2.06884 | 4.042497 | 9.96E-87 | 7.59E-86 |
| LAMA4 | -5.83672 | 1.201143 | 1.44E-86 | 1.1E-85 |
| THEM6 | -2.10978 | 4.793227 | 2.48E-86 | 1.88E-85 |
| MARK1 | -4.82575 | 1.41888 | 2.97E-86 | 2.25E-85 |
| SRPX | -5.66214 | 1.472437 | 4.45E-86 | 3.37E-85 |
| C3orf18 | -4.02146 | 1.809496 | 5.77E-86 | 4.36E-85 |
| JAG1 | -5.43916 | 1.372406 | 5.93E-86 | 4.48E-85 |
| MFAP5 | -8.39531 | 1.142252 | 1.91E-85 | 1.44E-84 |
| CUZD1 | -10.2385 | 1.187945 | 2.32E-85 | 1.74E-84 |
| SUSD1 | -7.52021 | 1.05467 | 2.57E-85 | 1.93E-84 |
| SYNC | -3.2631 | 2.672343 | 3.72E-85 | 2.79E-84 |
| PIGW | -2.45684 | 3.559403 | 4.2E-85 | 3.15E-84 |
| GNAO1 | -4.3735 | 2.155798 | 8.84E-85 | 6.6E-84 |
| THBS1 | -4.39155 | 1.388091 | 1.26E-84 | 9.39E-84 |
| AC004076.7 | -3.63569 | 1.810785 | 3.4E-84 | 2.52E-83 |
| SLC35F3 | -5.15161 | 1.202821 | 1.35E-83 | 9.97E-83 |
| GSTO2 | -2.83122 | 2.618215 | 2.59E-83 | 1.91E-82 |
| SERPINI1 | -4.43457 | 1.728319 | 3.42E-83 | 2.51E-82 |
| ZNF860 | -9.85503 | 0.808224 | 1.3E-82 | 9.48E-82 |
| OLR1 | -4.40504 | 1.408511 | 2.1E-82 | 1.53E-81 |
| TMEM47 | -8.096 | 2.133755 | 2.11E-82 | 1.54E-81 |
| MAGEA2 | -9.95265 | 0.904804 | 3.27E-82 | 2.37E-81 |
| PIM1 | -2.14055 | 3.636376 | 4.95E-82 | 3.59E-81 |
| NR1D1 | -2.10325 | 3.81688 | 5.16E-82 | 3.75E-81 |
| VGLL3 | -7.54462 | 1.577623 | 5.2E-82 | 3.77E-81 |
| NACAD | -7.64256 | 1.177128 | 7.62E-82 | 5.52E-81 |
| FMN2 | -8.76705 | 1.515866 | 3.71E-81 | 2.68E-80 |
| ACOT4 | -6.07996 | 1.044979 | 4.23E-81 | 3.05E-80 |
| THSD4 | -2.51092 | 3.038688 | 5.64E-81 | 4.05E-80 |
| CCDC152 | -6.93566 | 1.332436 | 8.21E-81 | 5.89E-80 |
| ALPPL2 | -5.76769 | 1.45237 | 8.26E-81 | 5.93E-80 |
| PDE10A | -10.0005 | 0.952683 | 1.24E-80 | 8.89E-80 |
| ALX1 | -7.70155 | 1.235071 | 1.64E-80 | 1.17E-79 |
| RINL | -4.87526 | 1.556861 | 5.21E-80 | 3.71E-79 |
| SPTLC3 | -10.1214 | 1.058132 | 9.26E-80 | 6.58E-79 |
| ANKEF1 | -9.8694 | 0.826576 | 1.41E-79 | 9.97E-79 |
| C11orf86 | -8.04163 | 0.797887 | 4.54E-79 | 3.2E-78 |
| TNFAIP3 | -2.16072 | 3.27336 | 1.32E-78 | 9.26E-78 |
| MEIS3 | -2.73247 | 2.488789 | 1.73E-78 | 1.21E-77 |
| CPED1 | -5.87024 | 1.050238 | 3.75E-78 | 2.62E-77 |
| ATP6V0A4 | -6.51579 | 0.942082 | 8.7E-78 | 6.05E-77 |
| CDH13 | -6.48046 | 0.904636 | 1.44E-77 | 1E-76 |
| HRASLS2 | -5.93078 | 0.893916 | 3.5E-77 | 2.42E-76 |
| FAM111B | -6.30866 | 1.678368 | 4.15E-77 | 2.86E-76 |
| TMBIM4 | -3.18291 | 2.203737 | 9.36E-77 | 6.43E-76 |
| PLEKHA7 | -2.11809 | 3.344408 | 1.51E-76 | 1.04E-75 |
| FUT1 | -3.1907 | 1.843999 | 2.96E-76 | 2.02E-75 |
| DHRS4 | -2.10721 | 3.878331 | 3.69E-76 | 2.51E-75 |
| PCSK1 | -9.92331 | 0.865048 | 3.78E-76 | 2.57E-75 |
| SAMD9 | -3.63293 | 1.541622 | 7.42E-76 | 5.03E-75 |
| ZC3H12A | -2.18454 | 3.664233 | 1.08E-75 | 7.34E-75 |
| SEC14L4 | -6.40461 | 1.104603 | 4.88E-75 | 3.29E-74 |
| GRK5 | -2.21969 | 3.114519 | 1.2E-74 | 8.09E-74 |
| MMP17 | -3.11261 | 2.28444 | 1.22E-74 | 8.19E-74 |
| C5orf63 | -4.05218 | 1.750995 | 3.81E-74 | 2.55E-73 |
| ZNF311 | -9.76849 | 0.717316 | 1.61E-73 | 1.07E-72 |
| TFF1 | -9.75802 | 0.7077 | 2.25E-73 | 1.49E-72 |
| ZNF154 | -4.95789 | 0.900562 | 2.67E-73 | 1.77E-72 |
| IL7R | -9.73617 | 0.687819 | 5.22E-73 | 3.45E-72 |
| NUP62CL | -10.0153 | 0.949131 | 8.82E-73 | 5.81E-72 |
| RAET1E | -7.27416 | 0.81483 | 9E-73 | 5.93E-72 |
| CYSRT1 | -3.65323 | 2.338242 | 1.05E-72 | 6.87E-72 |
| GCNT1 | -6.14542 | 0.865818 | 2.35E-72 | 1.54E-71 |
| SAMD12 | -4.77679 | 1.140203 | 2.94E-72 | 1.93E-71 |
| EDN1 | -9.63889 | 0.600219 | 5.97E-72 | 3.91E-71 |
| C11orf53 | -10.0583 | 1.007063 | 1.56E-71 | 1.02E-70 |
| TMEM190 | -3.96887 | 1.549054 | 2.76E-71 | 1.79E-70 |
| GPX1 | -8.63784 | 7.813553 | 1.2E-70 | 7.73E-70 |
| RP11-1021N1.1 | -5.75151 | 0.942825 | 1.22E-70 | 7.84E-70 |
| HIST2H4B | -2.41601 | 2.8469 | 2.36E-70 | 1.52E-69 |
| NR4A2 | -2.46613 | 3.009038 | 4E-70 | 2.57E-69 |
| SCUBE1 | -3.79502 | 1.423972 | 4.34E-70 | 2.78E-69 |
| SNED1 | -2.27801 | 2.89651 | 4.56E-70 | 2.92E-69 |
| GPR173 | -9.66556 | 0.619494 | 4.84E-70 | 3.1E-69 |
| TMEM133 | -5.09381 | 0.784303 | 7.18E-70 | 4.59E-69 |
| KCNH1 | -9.74203 | 0.707986 | 7.89E-70 | 5.04E-69 |
| GATA5 | -9.66353 | 0.624869 | 1.86E-69 | 1.18E-68 |
| RIBC2 | -9.67531 | 0.638481 | 7.14E-69 | 4.52E-68 |
| CSDC2 | -3.24833 | 2.387257 | 7.24E-69 | 4.59E-68 |
| KIAA0825 | -3.50279 | 1.334744 | 1.02E-68 | 6.44E-68 |
| MAN1A1 | -6.89748 | 1.303598 | 1.27E-68 | 8E-68 |
| HSPB3 | -7.75447 | 0.520826 | 6.28E-68 | 3.93E-67 |
| CATSPER1 | -4.00419 | 1.287084 | 6.6E-68 | 4.13E-67 |
| MB | -3.43087 | 1.336211 | 7.35E-68 | 4.6E-67 |
| DCN | -6.95561 | 0.508466 | 1.4E-67 | 8.74E-67 |
| PTN | -7.79079 | 0.553435 | 1.47E-67 | 9.15E-67 |
| ING3 | -2.56808 | 2.927558 | 3.23E-67 | 2.01E-66 |
| SOX9 | -5.25056 | 1.188964 | 5.33E-67 | 3.3E-66 |
| SMN2 | -3.28869 | 2.837716 | 7.13E-67 | 4.41E-66 |
| PDE9A | -4.46024 | 1.336788 | 1.75E-66 | 1.08E-65 |
| TMEM200C | -7.6813 | 0.453468 | 5.89E-66 | 3.6E-65 |
| DDR2 | -2.26658 | 3.932609 | 5.03E-65 | 3.03E-64 |
| SLC16A7 | -5.73824 | 1.63836 | 7.32E-65 | 4.4E-64 |
| KANK4 | -6.90758 | 0.46064 | 3.19E-64 | 1.9E-63 |
| L3MBTL3 | -5.23493 | 0.911241 | 3.46E-64 | 2.06E-63 |
| PDZD2 | -4.1983 | 1.201829 | 1.71E-63 | 1.01E-62 |
| GGACT | -7.77605 | 0.534265 | 1.9E-63 | 1.12E-62 |
| STON2 | -4.39325 | 1.137706 | 1.95E-63 | 1.15E-62 |
| HSPB7 | -5.49153 | 1.025792 | 3.07E-63 | 1.81E-62 |
| LGALS9 | -5.13397 | 0.952313 | 6.61E-63 | 3.88E-62 |
| PRSS56 | -4.88094 | 1.328995 | 1.48E-62 | 8.64E-62 |
| KATNAL2 | -3.38523 | 1.299827 | 1.56E-62 | 9.13E-62 |
| MAL2 | -6.06824 | 0.788543 | 1.83E-62 | 1.07E-61 |
| YPEL3 | -4.27829 | 1.167121 | 2.28E-62 | 1.33E-61 |
| IGSF1 | -5.32982 | 0.717764 | 5.14E-62 | 3E-61 |
| HOXA7 | -2.81784 | 1.99527 | 6.49E-62 | 3.78E-61 |
| TMEM238 | -6.11261 | 2.071078 | 6.95E-62 | 4.04E-61 |
| ZNF703 | -2.17004 | 3.004135 | 7.96E-62 | 4.63E-61 |
| PDK4 | -9.52688 | 0.491656 | 8.32E-62 | 4.83E-61 |
| KLHL30 | -5.7411 | 0.479831 | 2.14E-61 | 1.24E-60 |
| EPCAM | -3.25013 | 2.162298 | 3.18E-61 | 1.84E-60 |
| SGIP1 | -6.45876 | 0.527133 | 6.98E-61 | 4E-60 |
| LRIG3 | -7.68036 | 0.453376 | 1.06E-60 | 6.04E-60 |
| C3 | -4.94189 | 4.500909 | 2.09E-60 | 1.19E-59 |
| LFNG | -3.29766 | 1.998871 | 4.04E-60 | 2.29E-59 |
| HIST1H4I | -6.13169 | 0.578388 | 1.8E-59 | 1.01E-58 |
| ITGB8 | -6.3464 | 1.300184 | 2.28E-59 | 1.28E-58 |
| FGF7 | -3.51188 | 2.131187 | 5.67E-59 | 3.18E-58 |
| DENND3 | -2.06633 | 2.754772 | 6.02E-59 | 3.37E-58 |
| LMO1 | -5.02829 | 1.258558 | 7.35E-59 | 4.11E-58 |
| IFI44 | -9.32374 | 0.291194 | 1.02E-58 | 5.69E-58 |
| XXbac-BPG116M5.17 | -4.34133 | 0.899279 | 1.32E-58 | 7.34E-58 |
| ARMC4 | -7.49946 | 0.281789 | 3.44E-58 | 1.9E-57 |
| LOXL1 | -7.56349 | 0.343467 | 3.54E-58 | 1.96E-57 |
| AGA | -2.01221 | 2.703179 | 3.68E-58 | 2.04E-57 |
| PKIA | -9.5768 | 0.528466 | 5.77E-58 | 3.18E-57 |
| JAKMIP2 | -7.17588 | 0.705267 | 6.15E-58 | 3.39E-57 |
| ALPI | -7.50913 | 0.289077 | 1.05E-57 | 5.74E-57 |
| CDON | -2.83065 | 2.027761 | 1.78E-57 | 9.71E-57 |
| NRIP1 | -6.46999 | 0.534253 | 2.18E-57 | 1.19E-56 |
| BEST1 | -2.7905 | 3.418019 | 2.21E-57 | 1.21E-56 |
| ADAMTS5 | -3.28465 | 1.538106 | 2.26E-57 | 1.23E-56 |
| S100A6 | -10.8309 | 10.05745 | 2.8E-57 | 1.52E-56 |
| AKR1C3 | -3.95508 | 1.876346 | 5.23E-57 | 2.84E-56 |
| GPRIN3 | -6.727 | 0.285537 | 5.25E-57 | 2.85E-56 |
| NCEH1 | -2.03627 | 2.977043 | 7.1E-57 | 3.84E-56 |
| SOWAHC | -2.02985 | 5.005979 | 8.55E-57 | 4.63E-56 |
| SLC4A4 | -4.72796 | 0.809139 | 8.58E-57 | 4.64E-56 |
| GLDN | -6.64365 | 0.211511 | 1.82E-56 | 9.82E-56 |
| CACNA1G | -5.41459 | 0.787482 | 2.42E-56 | 1.3E-55 |
| PELI2 | -7.44198 | 0.22502 | 2.72E-56 | 1.46E-55 |
| ZBTB20 | -5.36473 | 0.729173 | 1.23E-55 | 6.54E-55 |
| RHBDL1 | -2.85148 | 2.455612 | 2.97E-55 | 1.57E-54 |
| RICTOR | -2.59389 | 3.152236 | 4.49E-55 | 2.36E-54 |
| SPINK13 | -8.0887 | 0.861687 | 5.83E-55 | 3.06E-54 |
| WSCD1 | -3.92312 | 1.024046 | 2.62E-54 | 1.36E-53 |
| TBC1D30 | -2.78277 | 1.644423 | 5.57E-54 | 2.88E-53 |
| DSC2 | -6.71659 | 0.282364 | 6.44E-54 | 3.33E-53 |
| MST1R | -7.58097 | 0.352464 | 1.27E-53 | 6.55E-53 |
| XKR8 | -5.45154 | 0.442585 | 1.31E-53 | 6.76E-53 |
| AMTN | -7.67672 | 0.447553 | 2.83E-53 | 1.45E-52 |
| ABHD13 | -2.33567 | 3.208077 | 4.23E-53 | 2.17E-52 |
| MAP3K5 | -2.52945 | 2.825555 | 1.67E-52 | 8.46E-52 |
| S100A14 | -5.81629 | 0.265466 | 1.71E-52 | 8.67E-52 |
| RAB27B | -9.90727 | 0.85741 | 2.9E-52 | 1.46E-51 |
| CDK14 | -7.31805 | 0.109487 | 3.22E-52 | 1.62E-51 |
| ODF3B | -9.1593 | 0.138021 | 4.2E-52 | 2.11E-51 |
| ABLIM2 | -2.93352 | 1.900894 | 5.3E-52 | 2.66E-51 |
| EPHA6 | -6.64582 | 0.203498 | 8.9E-52 | 4.45E-51 |
| MASP1 | -6.56114 | 0.127162 | 1E-51 | 5E-51 |
| ZNF594 | -7.29488 | 0.083184 | 1.16E-51 | 5.79E-51 |
| LAPTM5 | -9.18326 | 0.163957 | 1.57E-51 | 7.85E-51 |
| NR0B1 | -7.49241 | 0.27957 | 4.03E-51 | 2E-50 |
| HTR1D | -4.3148 | 0.935227 | 5.12E-51 | 2.54E-50 |
| MRGPRF | -7.08325 | 0.65401 | 1.69E-50 | 8.29E-50 |
| DNAH17 | -5.68781 | 0.440501 | 2.16E-50 | 1.06E-49 |
| BCHE | -5.52311 | 0.277254 | 6.75E-50 | 3.28E-49 |
| ARHGAP25 | -9.05281 | 0.037674 | 7.12E-50 | 3.46E-49 |
| DEPTOR | -3.18321 | 1.060335 | 9.21E-50 | 4.47E-49 |
| VAV3 | -5.3315 | 0.335933 | 1.55E-49 | 7.52E-49 |
| NYAP2 | -5.323 | 0.517353 | 2.84E-49 | 1.37E-48 |
| ZNF385B | -7.34369 | 0.121815 | 4.13E-49 | 1.99E-48 |
| SERTAD4 | -7.3398 | 0.135157 | 5.15E-49 | 2.47E-48 |
| TMTC2 | -4.20176 | 1.202538 | 5.34E-49 | 2.56E-48 |
| TMEM92 | -2.29472 | 2.706605 | 7.5E-49 | 3.59E-48 |
| HIST1H2AE | -2.63186 | 1.549192 | 7.55E-49 | 3.61E-48 |
| ZFP69 | -4.52228 | 0.383504 | 8.93E-49 | 4.26E-48 |
| FRAS1 | -6.09491 | 0.162924 | 1.06E-48 | 5.07E-48 |
| MTUS2 | -6.52801 | 0.108233 | 1.61E-48 | 7.64E-48 |
| OTUD1 | -2.48166 | 2.626554 | 1.71E-48 | 8.11E-48 |
| TNFSF15 | -5.71947 | 0.168539 | 1.99E-48 | 9.44E-48 |
| ANTXR2 | -4.78006 | 0.354357 | 3.12E-48 | 1.48E-47 |
| ZNF182 | -9.03229 | 0.021436 | 7.07E-48 | 3.33E-47 |
| PIEZO2 | -6.52266 | 0.086284 | 1.27E-47 | 5.95E-47 |
| CA13 | -2.07315 | 2.321685 | 2.19E-47 | 1.03E-46 |
| CTSS | -2.97766 | 1.580888 | 2.23E-47 | 1.04E-46 |
| MAFB | -5.80231 | 0.246774 | 2.25E-47 | 1.05E-46 |
| KLF4 | -3.2484 | 1.003439 | 4.25E-47 | 1.98E-46 |
| PTPRB | -6.51955 | 0.085903 | 4.4E-47 | 2.05E-46 |
| NRCAM | -8.94358 | -0.06803 | 5.51E-47 | 2.56E-46 |
| ABCA1 | -6.75723 | 0.311382 | 1.39E-46 | 6.43E-46 |
| OLFML2A | -2.00203 | 2.264651 | 1.9E-46 | 8.78E-46 |
| HIST1H4E | -2.58715 | 1.608995 | 4E-46 | 1.84E-45 |
| IRF7 | -9.25884 | 0.251742 | 5.06E-46 | 2.33E-45 |
| SLC22A15 | -2.21757 | 2.071674 | 1.16E-45 | 5.31E-45 |
| STK33 | -8.9172 | -0.09241 | 1.2E-45 | 5.51E-45 |
| SYT13 | -7.09046 | -0.10752 | 1.63E-45 | 7.43E-45 |
| NALCN | -7.33644 | 0.119723 | 1.72E-45 | 7.84E-45 |
| GIPC3 | -2.24005 | 2.360003 | 2.13E-45 | 9.7E-45 |
| HIST1H3F | -4.69815 | 0.282784 | 2.2E-45 | 1E-44 |
| COL6A5 | -4.78444 | 0.204306 | 2.32E-45 | 1.05E-44 |
| STK32B | -5.47613 | 0.240637 | 2.65E-45 | 1.2E-44 |
| HS6ST3 | -6.49744 | 0.081094 | 6.16E-45 | 2.78E-44 |
| PCLO | -4.55494 | 0.405795 | 7.58E-45 | 3.42E-44 |
| WFIKKN1 | -4.65325 | 0.736132 | 7.84E-45 | 3.54E-44 |
| GAP43 | -8.96934 | -0.04998 | 8.01E-45 | 3.61E-44 |
| FRY | -7.07775 | -0.11754 | 1.01E-44 | 4.52E-44 |
| TFF2 | -7.05621 | -0.14111 | 2.22E-44 | 9.96E-44 |
| CLDN3 | -9.4326 | 0.415021 | 2.5E-44 | 1.12E-43 |
| SLC22A3 | -6.33843 | -0.07563 | 3.05E-44 | 1.36E-43 |
| RNF125 | -2.52444 | 1.629964 | 4.89E-44 | 2.18E-43 |
| FGF18 | -3.60792 | 1.069503 | 5.91E-44 | 2.63E-43 |
| PLAG1 | -3.45293 | 0.972354 | 6.3E-44 | 2.8E-43 |
| HS3ST3A1 | -9.24128 | 0.186928 | 7.66E-44 | 3.4E-43 |
| SMAD7 | -2.03486 | 2.43667 | 7.99E-44 | 3.55E-43 |
| SYT7 | -2.59382 | 1.23795 | 8.15E-44 | 3.62E-43 |
| SHISA2 | -9.69471 | 0.62926 | 8.95E-44 | 3.96E-43 |
| MYO16 | -7.11464 | -0.08491 | 1.2E-43 | 5.32E-43 |
| RTN4RL2 | -2.52171 | 1.631774 | 1.34E-43 | 5.9E-43 |
| NUPR1 | -2.10151 | 2.56228 | 1.44E-43 | 6.34E-43 |
| HIST1H2BG | -2.89546 | 1.158704 | 4.17E-43 | 1.83E-42 |
| LEF1 | -8.99797 | -0.03202 | 8.36E-43 | 3.65E-42 |
| ACCS | -8.88044 | -0.11982 | 8.72E-43 | 3.8E-42 |
| CCDC68 | -8.88007 | -0.12558 | 9.68E-43 | 4.22E-42 |
| SLC25A27 | -8.88885 | -0.1173 | 1.28E-42 | 5.56E-42 |
| PAPLN | -7.00922 | -0.17773 | 3.81E-42 | 1.64E-41 |
| HAS2 | -8.77464 | -0.22712 | 4.56E-42 | 1.97E-41 |
| DCBLD2 | -2.41721 | 1.633403 | 5.84E-42 | 2.51E-41 |
| LBH | -3.02228 | 0.810502 | 1.67E-41 | 7.15E-41 |
| GLRB | -6.95321 | -0.23593 | 3.13E-41 | 1.33E-40 |
| LOXL4 | -5.22656 | 0.46312 | 4.67E-41 | 1.98E-40 |
| HIST1H4A | -2.96787 | 1.039459 | 4.99E-41 | 2.12E-40 |
| RP11-277P12.6 | -8.79147 | -0.20404 | 8.32E-41 | 3.52E-40 |
| ITGBL1 | -8.7387 | -0.26224 | 9.11E-41 | 3.85E-40 |
| LDLRAD4 | -4.89603 | 0.119287 | 9.26E-41 | 3.91E-40 |
| C19orf33 | -9.44195 | 0.4537 | 1.01E-40 | 4.27E-40 |
| FMN1 | -4.39056 | 0.130402 | 1.07E-40 | 4.49E-40 |
| CABP4 | -5.88882 | -0.02593 | 1.14E-40 | 4.79E-40 |
| SLC5A12 | -5.45601 | -0.06914 | 1.23E-40 | 5.17E-40 |
| IL1A | -8.77259 | -0.23402 | 1.26E-40 | 5.32E-40 |
| TMEM106A | -4.35326 | 0.442184 | 1.55E-40 | 6.49E-40 |
| IL1RAP | -2.74537 | 0.971143 | 1.63E-40 | 6.84E-40 |
| TLR4 | -7.06529 | -0.13883 | 1.72E-40 | 7.21E-40 |
| FKBP7 | -2.01385 | 2.987374 | 2.74E-40 | 1.15E-39 |
| ZNF738 | -4.5192 | 0.112972 | 2.75E-40 | 1.15E-39 |
| MARVELD2 | -4.31016 | 0.187163 | 3.38E-40 | 1.41E-39 |
| TH | -7.08343 | -0.12316 | 3.63E-40 | 1.51E-39 |
| ACTR3C | -5.00259 | 0.025192 | 4.37E-40 | 1.82E-39 |
| JPH1 | -2.54052 | 2.349955 | 5.62E-40 | 2.33E-39 |
| MB21D2 | -2.40028 | 1.750647 | 6.46E-40 | 2.68E-39 |
| PHYHIP | -5.37307 | -0.1435 | 8.34E-40 | 3.45E-39 |
| TBC1D3L | -4.75605 | 0.187137 | 8.64E-40 | 3.57E-39 |
| TRIML2 | -6.89447 | -0.29004 | 9.22E-40 | 3.81E-39 |
| PITPNM3 | -3.98294 | 0.317107 | 9.53E-40 | 3.94E-39 |
| APOLD1 | -2.81335 | 0.972275 | 1.08E-39 | 4.47E-39 |
| NAA16 | -2.26927 | 1.894873 | 1.59E-39 | 6.52E-39 |
| RNF43 | -2.54925 | 1.109542 | 3.21E-39 | 1.32E-38 |
| PSD4 | -2.18143 | 1.691398 | 5.15E-39 | 2.11E-38 |
| GJA1 | -2.68848 | 2.631121 | 7.3E-39 | 2.98E-38 |
| C1QTNF6 | -2.21892 | 2.221498 | 8.38E-39 | 3.41E-38 |
| DACT1 | -3.92062 | 0.509223 | 9.39E-39 | 3.82E-38 |
| CMKLR1 | -8.88234 | -0.11195 | 9.47E-39 | 3.85E-38 |
| COL4A4 | -8.63764 | -0.35612 | 2.11E-38 | 8.53E-38 |
| MPP7 | -4.96544 | 0.182188 | 2.66E-38 | 1.07E-37 |
| ARL4C | -3.37416 | 0.521621 | 3.47E-38 | 1.4E-37 |
| KCTD12 | -5.76747 | 0.764346 | 4.32E-38 | 1.74E-37 |
| ARHGAP42 | -3.51641 | 0.535769 | 5.18E-38 | 2.08E-37 |
| TNFRSF11B | -5.01512 | 0.03289 | 7.19E-38 | 2.88E-37 |
| THRB | -6.05045 | -0.34019 | 7.33E-38 | 2.93E-37 |
| PLCB2 | -5.95439 | 0.03263 | 1.27E-37 | 5.05E-37 |
| GPR1 | -6.83077 | -0.3551 | 1.32E-37 | 5.27E-37 |
| GPR37 | -4.49533 | -0.06347 | 1.47E-37 | 5.85E-37 |
| PAX8 | -4.6857 | -0.06715 | 1.55E-37 | 6.18E-37 |
| NR1D2 | -3.17181 | 2.149157 | 2.15E-37 | 8.54E-37 |
| MBNL2 | -4.41743 | 2.34821 | 2.95E-37 | 1.17E-36 |
| LGALS9C | -8.58317 | -0.40575 | 3.98E-37 | 1.57E-36 |
| C3orf52 | -2.91814 | 0.719407 | 4.3E-37 | 1.7E-36 |
| RP11-47I22.4 | -2.73984 | 1.251146 | 5.24E-37 | 2.06E-36 |
| TAF4B | -2.69638 | 1.595116 | 7.8E-37 | 3.07E-36 |
| SUSD2 | -4.35916 | -0.03052 | 9.74E-37 | 3.82E-36 |
| RYR2 | -4.99191 | -0.2115 | 2.4E-36 | 9.33E-36 |
| CALHM3 | -8.59769 | -0.38778 | 2.45E-36 | 9.51E-36 |
| C1S | -2.43834 | 1.586028 | 3.25E-36 | 1.26E-35 |
| ARNT2 | -2.88325 | 0.757267 | 3.62E-36 | 1.4E-35 |
| IFI44L | -6.75377 | -0.4178 | 4.07E-36 | 1.58E-35 |
| TGFBI | -9.30878 | 8.018321 | 4.46E-36 | 1.73E-35 |
| TNFSF12 | -8.54197 | -0.4456 | 4.71E-36 | 1.83E-35 |
| PRDM13 | -8.68759 | -0.29482 | 4.96E-36 | 1.92E-35 |
| ESYT3 | -8.73924 | -0.25572 | 5.4E-36 | 2.09E-35 |
| HRASLS | -8.76239 | -0.2228 | 7E-36 | 2.7E-35 |
| TACR1 | -8.59638 | -0.388 | 8.08E-36 | 3.11E-35 |
| RTKN2 | -5.04975 | -0.15425 | 8.25E-36 | 3.17E-35 |
| FBXL3 | -2.37015 | 2.844312 | 8.47E-36 | 3.25E-35 |
| HIST1H3G | -8.54315 | -0.43827 | 1.05E-35 | 4.03E-35 |
| DIO3 | -5.21918 | -0.28946 | 1.1E-35 | 4.23E-35 |
| TMEM52B | -4.36112 | 0.092674 | 1.25E-35 | 4.79E-35 |
| MUC5AC | -8.60051 | -0.39433 | 1.27E-35 | 4.86E-35 |
| PADI1 | -6.92521 | -0.24883 | 1.42E-35 | 5.44E-35 |
| HS3ST1 | -5.13299 | -0.08657 | 4.85E-35 | 1.84E-34 |
| STXBP6 | -5.58621 | -0.2991 | 5.41E-35 | 2.05E-34 |
| MPZL3 | -2.3484 | 1.945126 | 6.99E-35 | 2.64E-34 |
| PLCB1 | -6.71001 | -0.45831 | 8.87E-35 | 3.34E-34 |
| MYT1L | -9.07463 | 0.054814 | 1.4E-34 | 5.26E-34 |
| PLXNA2 | -7.02986 | -0.1459 | 1.69E-34 | 6.31E-34 |
| CCL28 | -4.20015 | -0.04437 | 2.91E-34 | 1.09E-33 |
| KLHDC7B | -3.7786 | 0.116899 | 3.7E-34 | 1.38E-33 |
| CREB3L1 | -2.41972 | 1.111425 | 3.99E-34 | 1.49E-33 |
| TNC | -4.80251 | -0.15785 | 4.15E-34 | 1.55E-33 |
| CEMIP | -5.35286 | -0.14494 | 7.86E-34 | 2.91E-33 |
| KCNK3 | -5.15393 | -0.34702 | 9.81E-34 | 3.63E-33 |
| HMX3 | -6.05546 | -0.32388 | 1.81E-33 | 6.67E-33 |
| NCKAP5 | -8.48252 | -0.49881 | 1.86E-33 | 6.85E-33 |
| NIPSNAP3A | -2.14531 | 2.879646 | 2.01E-33 | 7.4E-33 |
| ADGRG3 | -6.14319 | -0.24022 | 2.14E-33 | 7.84E-33 |
| SELPLG | -3.50846 | 0.746319 | 2.71E-33 | 9.94E-33 |
| GALNT9 | -2.41206 | 1.134765 | 3.19E-33 | 1.17E-32 |
| RTEL1-TNFRSF6B | -2.80179 | 0.87792 | 4.45E-33 | 1.62E-32 |
| SNAI2 | -2.07855 | 1.710056 | 4.48E-33 | 1.63E-32 |
| DOCK4 | -3.01803 | 0.622207 | 4.51E-33 | 1.65E-32 |
| LAMA1 | -6.60047 | -0.55541 | 7.17E-33 | 2.6E-32 |
| IL15 | -2.29172 | 1.027829 | 9.09E-33 | 3.29E-32 |
| WDR72 | -8.50954 | -0.47685 | 9.2E-33 | 3.33E-32 |
| ELOVL3 | -6.66931 | -0.49024 | 9.34E-33 | 3.38E-32 |
| RNF182 | -8.5001 | -0.487 | 1.1E-32 | 3.99E-32 |
| C11orf45 | -8.66387 | -0.30542 | 1.79E-32 | 6.44E-32 |
| TEX36 | -8.40497 | -0.56599 | 2.21E-32 | 7.94E-32 |
| KLHL29 | -2.35971 | 1.708706 | 3.49E-32 | 1.25E-31 |
| ADRB2 | -8.38442 | -0.58733 | 5.18E-32 | 1.84E-31 |
| SFMBT2 | -2.42861 | 0.978054 | 6.53E-32 | 2.32E-31 |
| ZNF365 | -8.3479 | -0.62144 | 7.99E-32 | 2.83E-31 |
| LIPH | -4.21166 | -0.1599 | 8.05E-32 | 2.85E-31 |
| TMEM74 | -8.35663 | -0.61102 | 1.02E-31 | 3.61E-31 |
| SAA1 | -8.33751 | -0.63244 | 1.25E-31 | 4.41E-31 |
| ESPNL | -2.04413 | 1.34177 | 1.27E-31 | 4.47E-31 |
| UCN2 | -5.48613 | 0.246739 | 1.36E-31 | 4.78E-31 |
| THEMIS2 | -5.55492 | -0.32952 | 1.43E-31 | 5.04E-31 |
| CRISPLD2 | -3.27369 | 0.209745 | 1.63E-31 | 5.75E-31 |
| GNGT1 | -6.58511 | -0.56704 | 1.77E-31 | 6.22E-31 |
| LTF | -3.98149 | -0.10415 | 1.93E-31 | 6.76E-31 |
| VIT | -8.51161 | -0.48555 | 2.4E-31 | 8.41E-31 |
| EGLN3 | -2.31104 | 1.706266 | 3.53E-31 | 1.23E-30 |
| ACTL10 | -4.9476 | -0.24038 | 3.98E-31 | 1.39E-30 |
| LGR6 | -3.85266 | 0.370669 | 4.39E-31 | 1.53E-30 |
| CHRDL2 | -4.75743 | -0.42689 | 5.44E-31 | 1.89E-30 |
| NTN4 | -3.85944 | 0.392654 | 7.67E-31 | 2.66E-30 |
| HOXD8 | -2.98504 | 0.556711 | 8.65E-31 | 2.99E-30 |
| C2orf70 | -8.63394 | -0.33303 | 8.76E-31 | 3.03E-30 |
| PCDHGB1 | -8.32609 | -0.63543 | 1.18E-30 | 4.07E-30 |
| BTBD16 | -4.47757 | -0.07993 | 1.24E-30 | 4.28E-30 |
| RGS17 | -8.36551 | -0.60887 | 1.49E-30 | 5.13E-30 |
| WNT6 | -4.23398 | -0.29419 | 2.87E-30 | 9.83E-30 |
| FAM24B | -5.33301 | -0.52402 | 3.26E-30 | 1.11E-29 |
| PRDM11 | -2.01628 | 1.509945 | 4.67E-30 | 1.59E-29 |
| ZNF490 | -2.57899 | 0.576227 | 5.62E-30 | 1.91E-29 |
| CASP1 | -6.6002 | -0.54661 | 7.67E-30 | 2.6E-29 |
| ATOH8 | -4.37556 | 0.146948 | 9.95E-30 | 3.37E-29 |
| CDH12 | -8.43653 | -0.56048 | 1.07E-29 | 3.62E-29 |
| KRT83 | -8.26135 | -0.69488 | 1.94E-29 | 6.55E-29 |
| DDIT4L | -6.42109 | -0.71875 | 1.97E-29 | 6.63E-29 |
| TSPAN19 | -8.53084 | -0.4563 | 2.27E-29 | 7.64E-29 |
| NFATC2 | -3.34705 | 0.14913 | 2.34E-29 | 7.86E-29 |
| MX2 | -5.93489 | -0.45589 | 4.08E-29 | 1.37E-28 |
| CALHM2 | -6.51342 | -0.62522 | 4.49E-29 | 1.5E-28 |
| SH2D6 | -2.54237 | 0.54519 | 7.26E-29 | 2.42E-28 |
| ADPRH | -8.27223 | -0.69226 | 8.29E-29 | 2.76E-28 |
| CD22 | -6.43068 | -0.71595 | 9.18E-29 | 3.06E-28 |
| IRAK3 | -4.17423 | -0.349 | 1.03E-28 | 3.43E-28 |
| CYP11A1 | -5.25525 | -0.59764 | 1.1E-28 | 3.66E-28 |
| FGF12 | -2.92183 | 0.95409 | 1.33E-28 | 4.41E-28 |
| TPPP3 | -2.54278 | 0.853049 | 4.64E-28 | 1.52E-27 |
| GPNMB | -3.04577 | 0.66385 | 4.73E-28 | 1.55E-27 |
| LTBP2 | -4.79313 | -0.40347 | 6.57E-28 | 2.14E-27 |
| ZBED2 | -6.377 | -0.76593 | 6.66E-28 | 2.17E-27 |
| FCGR2A | -3.89664 | -0.30209 | 8.16E-28 | 2.66E-27 |
| SRPX2 | -8.16467 | -0.78256 | 9.42E-28 | 3.06E-27 |
| RAP2A | -2.05334 | 3.155107 | 1.45E-27 | 4.68E-27 |
| RP11-872D17.8 | -6.32135 | -0.80759 | 1.55E-27 | 5E-27 |
| GPSM3 | -2.40207 | 0.849809 | 1.75E-27 | 5.65E-27 |
| NRG1 | -4.72182 | -0.45003 | 2.06E-27 | 6.64E-27 |
| CACNA2D3 | -8.409 | -0.58428 | 2.17E-27 | 6.98E-27 |
| CYP39A1 | -8.16203 | -0.79282 | 2.37E-27 | 7.62E-27 |
| SLC35E2 | -3.43838 | -0.07714 | 2.84E-27 | 9.12E-27 |
| HLX | -2.02257 | 1.167365 | 4.12E-27 | 1.32E-26 |
| LHX4 | -4.17762 | -0.35583 | 5.05E-27 | 1.61E-26 |
| LACC1 | -8.21983 | -0.74153 | 5.39E-27 | 1.72E-26 |
| FGD5 | -3.86334 | -0.3377 | 6.54E-27 | 2.08E-26 |
| ACSL5 | -4.0285 | -0.3132 | 7.97E-27 | 2.53E-26 |
| KCNJ15 | -2.03301 | 1.405002 | 1.14E-26 | 3.61E-26 |
| EHHADH | -3.35127 | 0.012184 | 1.34E-26 | 4.24E-26 |
| P2RY6 | -4.11654 | -0.26325 | 1.62E-26 | 5.1E-26 |
| HECW1 | -6.56004 | -0.57991 | 3.26E-26 | 1.02E-25 |
| CHL1 | -8.10351 | -0.84595 | 3.53E-26 | 1.11E-25 |
| PLXNB3 | -2.36539 | 0.638713 | 3.62E-26 | 1.14E-25 |
| FRMD3 | -3.14076 | 0.136106 | 3.64E-26 | 1.14E-25 |
| KLRK1 | -8.038 | -0.90184 | 4.26E-26 | 1.33E-25 |
| HIST1H4H | -2.15411 | 0.82003 | 4.51E-26 | 1.41E-25 |
| SEMA6D | -5.6795 | -0.24873 | 4.9E-26 | 1.53E-25 |
| MAPK15 | -2.83784 | 0.474404 | 5.87E-26 | 1.83E-25 |
| WNT10A | -2.89873 | 0.225209 | 7.68E-26 | 2.39E-25 |
| EMILIN2 | -3.40648 | -0.18821 | 1.15E-25 | 3.57E-25 |
| HOGA1 | -3.21338 | -0.11281 | 1.67E-25 | 5.16E-25 |
| PALM2 | -4.29273 | -0.61015 | 2.7E-25 | 8.3E-25 |
| IFT74 | -2.84657 | 0.129499 | 3.44E-25 | 1.05E-24 |
| ADM5 | -2.02822 | 1.33262 | 3.54E-25 | 1.09E-24 |
| LGSN | -7.99992 | -0.93177 | 6.93E-25 | 2.11E-24 |
| PI3 | -4.74314 | -0.70627 | 1.07E-24 | 3.24E-24 |
| TSPAN8 | -4.34291 | -0.5565 | 1.43E-24 | 4.32E-24 |
| HIST1H2AH | -3.55275 | -0.24755 | 1.48E-24 | 4.47E-24 |
| PRR16 | -5.08862 | -0.4315 | 1.57E-24 | 4.75E-24 |
| HIST2H2BF | -2.51156 | 0.707179 | 1.98E-24 | 5.96E-24 |
| GLCCI1 | -2.20359 | 1.891502 | 2.26E-24 | 6.8E-24 |
| RP11-886H22.1 | -2.05891 | 1.277126 | 3.03E-24 | 9.09E-24 |
| LANCL3 | -2.94644 | -0.07086 | 3.19E-24 | 9.57E-24 |
| SRRM4 | -4.49842 | -0.64637 | 3.35E-24 | 1.01E-23 |
| KIAA1456 | -3.32703 | -0.26362 | 4.79E-24 | 1.43E-23 |
| KIF25 | -5.05261 | -0.77973 | 4.81E-24 | 1.44E-23 |
| FXYD3 | -5.47105 | -0.86101 | 1.2E-23 | 3.55E-23 |
| ZNF559 | -5.16243 | -0.3385 | 1.22E-23 | 3.63E-23 |
| DKK1 | -4.27705 | -0.6123 | 1.34E-23 | 3.97E-23 |
| TENM1 | -8.06246 | -0.88678 | 1.36E-23 | 4.03E-23 |
| CDH6 | -4.00886 | -0.48946 | 1.59E-23 | 4.68E-23 |
| ARHGAP28 | -5.63538 | -0.71739 | 2E-23 | 5.88E-23 |
| CCDC122 | -4.17743 | -0.70699 | 2.03E-23 | 5.99E-23 |
| LRRIQ1 | -6.12901 | -0.98753 | 2.44E-23 | 7.19E-23 |
| GPR141 | -7.97778 | -0.94682 | 3.33E-23 | 9.76E-23 |
| OLFML3 | -3.90368 | -0.42008 | 4.65E-23 | 1.36E-22 |
| CDH19 | -8.0576 | -0.88746 | 5.19E-23 | 1.52E-22 |
| GLI3 | -4.08279 | -0.1544 | 6.94E-23 | 2.02E-22 |
| CCNE2 | -2.0399 | 0.791098 | 8.54E-23 | 2.48E-22 |
| PIWIL4 | -8.149 | -0.7834 | 1.08E-22 | 3.15E-22 |
| MAP3K7CL | -4.09514 | -0.57812 | 1.17E-22 | 3.4E-22 |
| BACH2 | -4.34821 | -0.78229 | 1.66E-22 | 4.81E-22 |
| PECAM1 | -6.15975 | -0.97126 | 1.8E-22 | 5.2E-22 |
| RASGRF2 | -4.27183 | -0.61986 | 2.23E-22 | 6.42E-22 |
| CRB2 | -5.95397 | -1.13131 | 2.37E-22 | 6.83E-22 |
| FAM179A | -3.19099 | -0.05308 | 2.42E-22 | 6.95E-22 |
| MYCBPAP | -5.47069 | -0.86185 | 2.78E-22 | 8E-22 |
| CHN2 | -7.77439 | -1.13121 | 2.91E-22 | 8.36E-22 |
| HIST1H2BF | -4.39153 | -0.7559 | 2.93E-22 | 8.42E-22 |
| CCDC169 | -4.96192 | -0.84998 | 3.56E-22 | 1.02E-21 |
| MUC13 | -7.94627 | -1.00113 | 4.83E-22 | 1.38E-21 |
| ZNF630 | -7.85194 | -1.066 | 4.97E-22 | 1.42E-21 |
| HIST1H2AI | -2.57827 | 0.398251 | 5.4E-22 | 1.54E-21 |
| SYCE1L | -3.74534 | -0.57587 | 5.55E-22 | 1.58E-21 |
| SLCO1C1 | -7.81725 | -1.09732 | 6.41E-22 | 1.82E-21 |
| GJC2 | -2.57345 | 0.263885 | 7.16E-22 | 2.03E-21 |
| ANXA8L1 | -7.73671 | -1.16434 | 8.35E-22 | 2.37E-21 |
| RNF224 | -4.91445 | -0.89013 | 1.35E-21 | 3.8E-21 |
| SHC4 | -2.73008 | 0.384502 | 1.68E-21 | 4.73E-21 |
| HIST1H2BH | -2.41112 | 0.514585 | 2.05E-21 | 5.75E-21 |
| LAMC2 | -4.07029 | -0.79643 | 2.39E-21 | 6.69E-21 |
| PTPRR | -7.89851 | -1.03321 | 2.47E-21 | 6.93E-21 |
| FAM83F | -4.00291 | -0.65942 | 2.58E-21 | 7.21E-21 |
| ABCA4 | -4.92512 | -0.88873 | 2.71E-21 | 7.59E-21 |
| GABRQ | -4.53152 | -0.88886 | 2.82E-21 | 7.88E-21 |
| STAC2 | -3.66146 | -0.28863 | 3.8E-21 | 1.06E-20 |
| ARHGAP29 | -3.54448 | -0.03246 | 4.93E-21 | 1.37E-20 |
| HBG2 | -4.79994 | -0.99023 | 7.82E-21 | 2.16E-20 |
| HSH2D | -3.1412 | -0.41825 | 8.5E-21 | 2.34E-20 |
| KCNN2 | -4.89955 | -0.89324 | 9.52E-21 | 2.62E-20 |
| SLCO2A1 | -2.05129 | 1.791292 | 1.53E-20 | 4.19E-20 |
| HOXA4 | -3.14988 | 0.553871 | 1.82E-20 | 4.97E-20 |
| ENTPD2 | -5.15666 | -1.13127 | 2.16E-20 | 5.9E-20 |
| CXXC4 | -4.39336 | -0.7418 | 2.26E-20 | 6.15E-20 |
| CCL20 | -4.27688 | -0.42283 | 3.14E-20 | 8.52E-20 |
| ABCA8 | -5.19005 | -1.11203 | 3.95E-20 | 1.07E-19 |
| LAMA2 | -4.48718 | -0.91869 | 6.38E-20 | 1.71E-19 |
| SBSPON | -5.80803 | -1.25214 | 6.53E-20 | 1.75E-19 |
| PAG1 | -4.71449 | -1.06658 | 7.3E-20 | 1.96E-19 |
| ANO2 | -5.80202 | -1.26689 | 7.44E-20 | 1.99E-19 |
| ETNPPL | -7.65551 | -1.23342 | 8.83E-20 | 2.36E-19 |
| IL1B | -5.09937 | -1.18135 | 9.83E-20 | 2.63E-19 |
| GRAMD2 | -5.79053 | -1.2697 | 1.21E-19 | 3.22E-19 |
| TAS1R3 | -7.61196 | -1.2698 | 1.22E-19 | 3.25E-19 |
| ISM1 | -7.57472 | -1.30511 | 1.38E-19 | 3.69E-19 |
| PEAR1 | -4.69439 | -0.73361 | 1.55E-19 | 4.12E-19 |
| GREM2 | -7.75059 | -1.14792 | 1.55E-19 | 4.13E-19 |
| ARHGAP20 | -7.65382 | -1.23377 | 1.74E-19 | 4.63E-19 |
| LTK | -2.99023 | -0.37664 | 1.86E-19 | 4.93E-19 |
| EPS8L3 | -4.19799 | -0.68936 | 2.77E-19 | 7.33E-19 |
| SUSD5 | -4.36791 | -0.54171 | 3.61E-19 | 9.51E-19 |
| UPK3B | -5.12647 | -1.14971 | 3.61E-19 | 9.52E-19 |
| C4orf19 | -4.6756 | -1.09913 | 4.14E-19 | 1.09E-18 |
| PCDHB13 | -2.62355 | 0.0752 | 5.78E-19 | 1.52E-18 |
| GNA15 | -3.7538 | -0.87661 | 1.06E-18 | 2.78E-18 |
| RNF138 | -2.18598 | 3.111388 | 1.19E-18 | 3.11E-18 |
| BNC2 | -4.00007 | -0.86003 | 1.35E-18 | 3.51E-18 |
| HDAC9 | -3.40681 | -0.71919 | 1.51E-18 | 3.92E-18 |
| PCDH9 | -3.01923 | -0.21863 | 1.68E-18 | 4.36E-18 |
| CPA4 | -3.43592 | -0.69261 | 1.69E-18 | 4.39E-18 |
| AVPR2 | -7.50471 | -1.36273 | 1.85E-18 | 4.8E-18 |
| PCDHGA6 | -3.54099 | -0.62012 | 1.86E-18 | 4.81E-18 |
| RTP3 | -5.70002 | -1.34393 | 2.07E-18 | 5.35E-18 |
| NOX5 | -4.39909 | -1.00289 | 2.53E-18 | 6.54E-18 |
| P2RX1 | -5.76624 | -1.28823 | 2.55E-18 | 6.57E-18 |
| SVOPL | -7.63791 | -1.23563 | 2.73E-18 | 7.05E-18 |
| GJB5 | -5.24917 | -1.03717 | 3.36E-18 | 8.64E-18 |
| OXR1 | -2.56014 | 0.951681 | 3.39E-18 | 8.72E-18 |
| CDCP1 | -7.52111 | -1.34469 | 4.05E-18 | 1.04E-17 |
| FGFBP1 | -7.46404 | -1.40051 | 4.25E-18 | 1.09E-17 |
| ARAP2 | -3.29034 | -0.58951 | 4.59E-18 | 1.18E-17 |
| PRCD | -7.4764 | -1.38315 | 6.85E-18 | 1.75E-17 |
| HMCN2 | -4.63135 | -1.14492 | 7.08E-18 | 1.81E-17 |
| C9orf84 | -4.50788 | -0.91578 | 7.22E-18 | 1.84E-17 |
| PPP1R3G | -5.26785 | -1.0093 | 9.52E-18 | 2.42E-17 |
| CTTNBP2 | -5.78227 | -1.27013 | 1.13E-17 | 2.86E-17 |
| LRRCC1 | -2.60586 | 0.12527 | 1.33E-17 | 3.38E-17 |
| KCNE5 | -3.59688 | -0.68402 | 1.47E-17 | 3.71E-17 |
| HS3ST3B1 | -6.23755 | -0.91236 | 1.53E-17 | 3.87E-17 |
| ADGRL2 | -4.51504 | -1.23318 | 2.11E-17 | 5.31E-17 |
| CD177 | -4.99389 | -1.26973 | 2.28E-17 | 5.73E-17 |
| AREG | -3.35647 | -0.54044 | 4.69E-17 | 1.17E-16 |
| BMPER | -5.59926 | -1.43975 | 4.83E-17 | 1.2E-16 |
| AIM1 | -2.96111 | -0.56524 | 5.24E-17 | 1.3E-16 |
| EBF1 | -7.59325 | -1.27087 | 5.64E-17 | 1.4E-16 |
| NOG | -5.63149 | -1.41856 | 6.44E-17 | 1.6E-16 |
| SETBP1 | -5.56414 | -1.46159 | 9.77E-17 | 2.42E-16 |
| SEMA3D | -5.53777 | -1.48238 | 1.06E-16 | 2.63E-16 |
| TRPA1 | -5.65388 | -1.3821 | 1.34E-16 | 3.3E-16 |
| EVPLL | -7.58586 | -1.27173 | 1.49E-16 | 3.66E-16 |
| BBOX1 | -7.39649 | -1.44389 | 1.67E-16 | 4.1E-16 |
| CCDC169-SOHLH2 | -7.37433 | -1.46421 | 2.02E-16 | 4.95E-16 |
| PSTPIP2 | -3.761 | -1.05201 | 2.81E-16 | 6.84E-16 |
| RASSF6 | -4.12058 | -1.23307 | 5.05E-16 | 1.22E-15 |
| TRIM6 | -7.25905 | -1.56931 | 5.62E-16 | 1.36E-15 |
| SLCO1B3 | -7.43409 | -1.404 | 5.74E-16 | 1.38E-15 |
| MYBL1 | -2.11406 | 0.974308 | 7.89E-16 | 1.9E-15 |
| KIAA1024 | -3.65939 | -0.94513 | 9.1E-16 | 2.18E-15 |
| GNG2 | -5.53228 | -1.48387 | 9.54E-16 | 2.29E-15 |
| KRT15 | -4.11667 | -1.23401 | 1.09E-15 | 2.62E-15 |
| RIN3 | -2.49887 | -0.26424 | 1.34E-15 | 3.19E-15 |
| SPARC | -2.61576 | -0.15336 | 2.15E-15 | 5.09E-15 |
| RAB38 | -5.02891 | -1.25048 | 3.17E-15 | 7.45E-15 |
| ABCG2 | -2.0444 | 0.25334 | 3.27E-15 | 7.69E-15 |
| TRPM3 | -4.73835 | -1.48185 | 3.53E-15 | 8.3E-15 |
| ALDH1A2 | -3.58155 | -1.19928 | 3.59E-15 | 8.43E-15 |
| PLSCR4 | -2.18865 | -0.1198 | 4.41E-15 | 1.03E-14 |
| CRYBG3 | -2.38742 | -0.19409 | 5.53E-15 | 1.29E-14 |
| C1orf204 | -7.17896 | -1.63707 | 6.87E-15 | 1.6E-14 |
| HIST1H4D | -7.20003 | -1.61515 | 6.92E-15 | 1.61E-14 |
| YPEL4 | -4.02937 | -1.30592 | 7.85E-15 | 1.82E-14 |
| HIST1H2BO | -2.61161 | 0.157836 | 8.73E-15 | 2.02E-14 |
| NBPF6 | -7.14571 | -1.66141 | 8.87E-15 | 2.06E-14 |
| ANK3 | -4.30681 | -1.40187 | 9.11E-15 | 2.11E-14 |
| LYPD1 | -3.12745 | -0.94524 | 1.15E-14 | 2.65E-14 |
| ZBTB7C | -7.11505 | -1.68557 | 1.29E-14 | 2.98E-14 |
| LRRN2 | -5.47763 | -1.52605 | 1.57E-14 | 3.62E-14 |
| CFAP74 | -2.6931 | -0.69405 | 1.9E-14 | 4.37E-14 |
| TMPRSS5 | -3.1641 | -0.9049 | 3.19E-14 | 7.25E-14 |
| HIST1H2AL | -7.11095 | -1.68629 | 3.25E-14 | 7.39E-14 |
| LIPE | -7.23079 | -1.57218 | 5.01E-14 | 1.13E-13 |
| C10orf55 | -3.65281 | -1.16317 | 6.32E-14 | 1.42E-13 |
| HOXA9 | -2.54412 | -0.3981 | 6.51E-14 | 1.47E-13 |
| TSPAN2 | -5.25134 | -1.71033 | 7.06E-14 | 1.59E-13 |
| YY2 | -2.06214 | 1.008626 | 7.19E-14 | 1.62E-13 |
| ZG16B | -4.23014 | -1.46233 | 7.34E-14 | 1.65E-13 |
| EPHA4 | -4.59499 | -1.59207 | 9.38E-14 | 2.11E-13 |
| SERPINB3 | -7.07774 | -1.71086 | 9.77E-14 | 2.19E-13 |
| HMGCLL1 | -7.02426 | -1.75941 | 1.04E-13 | 2.32E-13 |
| CNGB1 | -3.54486 | -1.23152 | 1.12E-13 | 2.51E-13 |
| RERG | -3.97812 | -1.36064 | 1.28E-13 | 2.85E-13 |
| PRDM12 | -2.33661 | -0.24977 | 1.84E-13 | 4.09E-13 |
| SOHLH2 | -4.60174 | -1.59094 | 1.85E-13 | 4.1E-13 |
| POU3F2 | -7.02039 | -1.76013 | 2.04E-13 | 4.53E-13 |
| SYT1 | -5.31522 | -1.68262 | 2.09E-13 | 4.64E-13 |
| CD68 | -2.5149 | -0.17296 | 2.44E-13 | 5.39E-13 |
| HOXA1 | -3.09351 | -0.96224 | 2.52E-13 | 5.57E-13 |
| SP9 | -2.94245 | -0.96323 | 3.06E-13 | 6.74E-13 |
| GALNT13 | -7.15722 | -1.68207 | 4.05E-13 | 8.88E-13 |
| GATM | -3.05114 | -0.43524 | 4.69E-13 | 1.03E-12 |
| SPATA12 | -5.25029 | -1.70977 | 5.19E-13 | 1.14E-12 |
| SCN4A | -2.14356 | -0.28647 | 5.98E-13 | 1.31E-12 |
| SYTL5 | -6.95612 | -1.81167 | 6.76E-13 | 1.48E-12 |
| SEMA5A | -5.28627 | -1.68434 | 6.78E-13 | 1.48E-12 |
| ABHD1 | -4.1244 | -1.54784 | 7.14E-13 | 1.56E-12 |
| FAP | -6.98291 | -1.78623 | 7.9E-13 | 1.72E-12 |
| TBXAS1 | -2.30739 | -0.29728 | 8E-13 | 1.74E-12 |
| TBC1D3D | -2.94969 | -0.95978 | 9.13E-13 | 1.98E-12 |
| IGFL2 | -4.57912 | -1.21269 | 9.61E-13 | 2.08E-12 |
| MAST4 | -3.06222 | -1.11781 | 1.37E-12 | 2.96E-12 |
| SULF1 | -4.59867 | -1.59089 | 1.63E-12 | 3.5E-12 |
| PLEKHA6 | -2.44514 | -0.46751 | 1.74E-12 | 3.75E-12 |
| ADGRV1 | -5.2276 | -1.71242 | 2.03E-12 | 4.35E-12 |
| ADIRF | -3.61696 | -1.38156 | 2.04E-12 | 4.37E-12 |
| HIST1H1B | -3.12229 | -1.21646 | 2.08E-12 | 4.46E-12 |
| KLHL31 | -4.23153 | -1.46154 | 2.28E-12 | 4.88E-12 |
| LY6G5C | -6.91397 | -1.83918 | 2.49E-12 | 5.33E-12 |
| ANKRD2 | -3.83 | -1.46215 | 2.72E-12 | 5.82E-12 |
| TNFAIP6 | -6.86037 | -1.89145 | 3.17E-12 | 6.75E-12 |
| PKP1 | -6.97313 | -1.7868 | 3.69E-12 | 7.83E-12 |
| GLIS3 | -2.52119 | -0.73372 | 4.62E-12 | 9.8E-12 |
| CREB5 | -6.86895 | -1.8905 | 5.48E-12 | 1.16E-11 |
| EFCAB13 | -3.81878 | -1.46479 | 6.04E-12 | 1.28E-11 |
| LHX9 | -4.12163 | -1.23388 | 6.4E-12 | 1.35E-11 |
| CLPSL2 | -6.82741 | -1.91916 | 6.89E-12 | 1.45E-11 |
| TCF21 | -4.08239 | -1.59037 | 7.32E-12 | 1.54E-11 |
| VIPR1 | -2.75294 | -0.79933 | 7.87E-12 | 1.65E-11 |
| TUBA8 | -2.1988 | -0.2859 | 8.68E-12 | 1.82E-11 |
| ZNF559-ZNF177 | -6.82083 | -1.92006 | 9.14E-12 | 1.92E-11 |
| ARHGAP24 | -3.37443 | -1.36121 | 1E-11 | 2.09E-11 |
| SELL | -4.476 | -1.68494 | 1.17E-11 | 2.45E-11 |
| CCNI2 | -3.34451 | -1.38277 | 1.21E-11 | 2.52E-11 |
| C1orf116 | -4.09248 | -1.56932 | 1.3E-11 | 2.72E-11 |
| RAET1L | -4.94603 | -1.94864 | 1.61E-11 | 3.35E-11 |
| CACNA1A | -3.31882 | -1.40069 | 1.97E-11 | 4.07E-11 |
| STEAP4 | -3.09221 | -1.23466 | 2.16E-11 | 4.47E-11 |
| TNFRSF11A | -3.10988 | -1.3836 | 2.27E-11 | 4.69E-11 |
| IL2RG | -4.31252 | -1.81145 | 2.33E-11 | 4.82E-11 |
| CGB8 | -3.94651 | -1.68459 | 2.36E-11 | 4.87E-11 |
| DPF3 | -3.76456 | -1.50701 | 2.37E-11 | 4.9E-11 |
| RGS11 | -3.49391 | -1.48177 | 2.41E-11 | 4.97E-11 |
| CLCNKB | -2.56242 | -0.87417 | 2.89E-11 | 5.94E-11 |
| CCL26 | -4.08511 | -1.57051 | 3.38E-11 | 6.92E-11 |
| SLC19A3 | -3.29101 | -1.42277 | 3.65E-11 | 7.46E-11 |
| RP11-257K9.8 | -4.49252 | -1.66291 | 3.73E-11 | 7.63E-11 |
| LAT2 | -2.81075 | -1.18253 | 3.85E-11 | 7.86E-11 |
| HACD4 | -3.37718 | -1.56973 | 4.19E-11 | 8.55E-11 |
| RORB | -4.31121 | -1.81214 | 4.71E-11 | 9.6E-11 |
| HNF4A | -2.34067 | -0.46744 | 7.42E-11 | 1.5E-10 |
| CORIN | -2.84697 | -1.28787 | 7.99E-11 | 1.61E-10 |
| DOCK10 | -4.87428 | -2.0068 | 8.34E-11 | 1.68E-10 |
| ADRA1B | -5.05025 | -1.86523 | 8.71E-11 | 1.76E-10 |
| CERKL | -6.62785 | -2.06876 | 1.08E-10 | 2.18E-10 |
| MSC | -6.67101 | -2.03769 | 1.1E-10 | 2.22E-10 |
| SSUH2 | -2.11783 | -0.37833 | 1.28E-10 | 2.58E-10 |
| SLC5A10 | -4.39895 | -1.7355 | 1.37E-10 | 2.74E-10 |
| VCX2 | -6.65999 | -2.03904 | 1.51E-10 | 3.01E-10 |
| IRF5 | -6.62619 | -2.06901 | 1.8E-10 | 3.59E-10 |
| IL24 | -6.62352 | -2.06951 | 1.81E-10 | 3.61E-10 |
| FOXN1 | -6.96032 | -1.83597 | 2.11E-10 | 4.19E-10 |
| SULT1A2 | -2.63323 | -1.09854 | 2.13E-10 | 4.23E-10 |
| C3orf80 | -3.08045 | -1.40134 | 2.2E-10 | 4.38E-10 |
| ADAMTS16 | -6.61885 | -2.07019 | 2.33E-10 | 4.63E-10 |
| FOLR2 | -4.16894 | -1.92011 | 2.98E-10 | 5.9E-10 |
| ZNF501 | -6.93655 | -1.83669 | 3.52E-10 | 6.94E-10 |
| HIST1H4B | -2.25664 | -0.64968 | 4E-10 | 7.88E-10 |
| SLC27A6 | -6.75178 | -2.00505 | 4.05E-10 | 7.98E-10 |
| BHLHA15 | -6.57602 | -2.10202 | 4.21E-10 | 8.28E-10 |
| SLITRK6 | -6.67428 | -2.03757 | 4.88E-10 | 9.58E-10 |
| RP11-290H9.2 | -6.72578 | -1.97938 | 5.01E-10 | 9.82E-10 |
| ZNF223 | -4.93943 | -1.94892 | 5.3E-10 | 1.04E-09 |
| PAMR1 | -6.57114 | -2.10249 | 5.66E-10 | 1.11E-09 |
| IL7 | -6.57029 | -2.10254 | 6.4E-10 | 1.25E-09 |
| RP11-307N16.6 | -2.07179 | -0.69631 | 6.93E-10 | 1.35E-09 |
| GLIPR1L2 | -6.53656 | -2.13383 | 7.07E-10 | 1.38E-09 |
| KRT9 | -6.53496 | -2.13411 | 7.24E-10 | 1.41E-09 |
| TNFSF10 | -2.6318 | -1.08689 | 7.92E-10 | 1.54E-09 |
| HEY2 | -2.40901 | -0.99271 | 8.37E-10 | 1.62E-09 |
| ERG | -6.60448 | -2.07099 | 1.16E-09 | 2.25E-09 |
| BMP4 | -3.1482 | -0.4529 | 1.18E-09 | 2.28E-09 |
| SH3TC2 | -4.89484 | -1.97891 | 1.22E-09 | 2.35E-09 |
| FAM13C | -4.89469 | -1.97936 | 1.25E-09 | 2.42E-09 |
| ECM2 | -6.57727 | -2.10149 | 1.29E-09 | 2.49E-09 |
| NEDD9 | -2.94198 | 0.102297 | 1.29E-09 | 2.49E-09 |
| FDCSP | -6.49384 | -2.16664 | 1.31E-09 | 2.52E-09 |
| S100P | -4.32404 | 2.849827 | 1.35E-09 | 2.59E-09 |
| TPRG1 | -4.7554 | -2.10007 | 1.43E-09 | 2.74E-09 |
| LPAR5 | -4.69073 | -2.13401 | 1.47E-09 | 2.82E-09 |
| CCDC33 | -6.49576 | -2.16644 | 1.64E-09 | 3.13E-09 |
| GSDMD | -3.58908 | -1.63822 | 1.94E-09 | 3.7E-09 |
| VCX3A | -4.85644 | -2.0085 | 1.97E-09 | 3.76E-09 |
| AMY2B | -2.29673 | -0.90294 | 2.5E-09 | 4.75E-09 |
| DAB1 | -6.44844 | -2.20046 | 2.61E-09 | 4.96E-09 |
| FAM196B | -6.44231 | -2.20141 | 2.71E-09 | 5.14E-09 |
| EPSTI1 | -6.44371 | -2.20121 | 2.76E-09 | 5.23E-09 |
| DLX3 | -2.42677 | -1.05024 | 3.02E-09 | 5.72E-09 |
| ADTRP | -6.7778 | -2.0045 | 3.12E-09 | 5.89E-09 |
| TPTE2 | -6.45059 | -2.20026 | 3.15E-09 | 5.95E-09 |
| HPGD | -6.40638 | -2.23462 | 3.5E-09 | 6.61E-09 |
| ASZ1 | -6.51912 | -2.16494 | 3.74E-09 | 7.04E-09 |
| PRICKLE2 | -6.51915 | -2.16494 | 3.75E-09 | 7.07E-09 |
| ODF3L1 | -3.40681 | -1.78495 | 3.88E-09 | 7.31E-09 |
| NPR1 | -2.56116 | -1.36458 | 5.11E-09 | 9.57E-09 |
| TRPC4 | -4.12719 | -1.94833 | 5.84E-09 | 1.09E-08 |
| MAATS1 | -6.39847 | -2.23562 | 6.13E-09 | 1.14E-08 |
| S1PR1 | -3.62478 | -1.92033 | 7.67E-09 | 1.42E-08 |
| FXYD4 | -6.39655 | -2.23587 | 7.84E-09 | 1.45E-08 |
| ACPP | -3.79376 | -1.80877 | 8.28E-09 | 1.53E-08 |
| ARL17B | -2.49515 | -1.01742 | 8.66E-09 | 1.6E-08 |
| C1orf167 | -2.65063 | -1.42457 | 9.01E-09 | 1.67E-08 |
| ZNF521 | -6.34654 | -2.27154 | 1.03E-08 | 1.89E-08 |
| CD8A | -2.01234 | -0.78661 | 1.07E-08 | 1.97E-08 |
| GNAT3 | -4.54328 | -2.2364 | 1.23E-08 | 2.26E-08 |
| EREG | -3.93642 | -1.70723 | 1.26E-08 | 2.33E-08 |
| THBS4 | -2.18731 | -0.76106 | 1.47E-08 | 2.7E-08 |
| AIFM3 | -3.66072 | -1.91881 | 1.61E-08 | 2.94E-08 |
| NOSTRIN | -3.14581 | -1.7345 | 1.63E-08 | 2.99E-08 |
| LDHC | -3.34445 | -1.8371 | 1.73E-08 | 3.15E-08 |
| GPR17 | -6.29746 | -2.30773 | 1.73E-08 | 3.17E-08 |
| RGPD8 | -2.09399 | -1.05416 | 2.17E-08 | 3.95E-08 |
| MATN3 | -4.69248 | -2.13326 | 2.23E-08 | 4.06E-08 |
| CRYBA2 | -6.3794 | -2.2373 | 2.29E-08 | 4.16E-08 |
| C20orf195 | -3.42867 | -1.75962 | 2.84E-08 | 5.14E-08 |
| CYP24A1 | -4.04521 | -2.00696 | 2.87E-08 | 5.19E-08 |
| LPPR4 | -6.30989 | -2.30706 | 2.9E-08 | 5.25E-08 |
| PCDHGB2 | -3.29584 | -1.86419 | 2.94E-08 | 5.31E-08 |
| AGTR1 | -6.23502 | -2.34651 | 3.68E-08 | 6.64E-08 |
| CCSER1 | -6.36387 | -2.238 | 4.1E-08 | 7.37E-08 |
| TCF24 | -6.19598 | -2.38294 | 4.19E-08 | 7.53E-08 |
| HHIPL2 | -3.74723 | -1.81332 | 4.28E-08 | 7.68E-08 |
| VCX | -3.39202 | -1.78667 | 4.36E-08 | 7.82E-08 |
| SKOR1 | -2.29424 | -1.14587 | 5.49E-08 | 9.81E-08 |
| SLA | -6.2029 | -2.38267 | 6.51E-08 | 1.16E-07 |
| SHC3 | -3.50117 | -2.00834 | 6.68E-08 | 1.19E-07 |
| PRR15 | -3.61729 | -1.92099 | 6.76E-08 | 1.2E-07 |
| ACTBL2 | -6.17882 | -2.3851 | 6.93E-08 | 1.23E-07 |
| NME8 | -6.1876 | -2.38392 | 6.96E-08 | 1.24E-07 |
| CKMT1B | -3.97201 | -2.04149 | 7.08E-08 | 1.26E-07 |
| PCDHB15 | -3.09719 | -1.76182 | 7.19E-08 | 1.28E-07 |
| CYP19A1 | -2.90573 | -1.7087 | 7.59E-08 | 1.35E-07 |
| HIST1H2BI | -4.59223 | -2.20132 | 7.63E-08 | 1.35E-07 |
| MAPK4 | -2.89303 | -1.70989 | 7.82E-08 | 1.39E-07 |
| RASD2 | -2.16973 | -1.16363 | 7.92E-08 | 1.4E-07 |
| NPTX1 | -2.09353 | -1.05312 | 1.02E-07 | 1.79E-07 |
| ZNF572 | -6.31887 | -2.27294 | 1.19E-07 | 2.1E-07 |
| OXTR | -2.08078 | -1.05335 | 1.28E-07 | 2.25E-07 |
| UNC5D | -6.1223 | -2.42448 | 1.3E-07 | 2.29E-07 |
| AC015688.3 | -4.32962 | -2.38405 | 1.31E-07 | 2.3E-07 |
| ACE | -2.88848 | -1.71062 | 1.51E-07 | 2.65E-07 |
| CYS1 | -2.28775 | -1.44377 | 1.83E-07 | 3.2E-07 |
| ADAMTSL2 | -3.63372 | -1.8932 | 1.91E-07 | 3.33E-07 |
| SUSD3 | -3.16771 | -1.94956 | 1.93E-07 | 3.37E-07 |
| COL4A3 | -4.26863 | -2.42365 | 2.32E-07 | 4.02E-07 |
| AQP5 | -6.06841 | -2.46431 | 2.37E-07 | 4.12E-07 |
| DYNLRB2 | -2.71465 | -1.54758 | 2.41E-07 | 4.18E-07 |
| PLXDC2 | -4.37943 | -2.34646 | 2.56E-07 | 4.45E-07 |
| LBX2 | -2.88937 | -1.70925 | 3.01E-07 | 5.21E-07 |
| MRGPRX3 | -2.80227 | -1.61405 | 3.11E-07 | 5.37E-07 |
| STEAP1B | -3.36074 | -2.10314 | 3.63E-07 | 6.27E-07 |
| IGSF9 | -3.14843 | -1.97711 | 3.84E-07 | 6.62E-07 |
| SATB1 | -2.94672 | -1.8663 | 4.04E-07 | 6.95E-07 |
| SLC34A3 | -3.82041 | -2.1658 | 4.09E-07 | 7.04E-07 |
| SLC1A7 | -6.00499 | -2.50622 | 4.33E-07 | 7.43E-07 |
| CD19 | -2.53399 | -1.50357 | 4.66E-07 | 7.99E-07 |
| HIST4H4 | -2.14318 | -1.25432 | 4.67E-07 | 8.01E-07 |
| PCDHGA2 | -3.3141 | -2.13497 | 5.59E-07 | 9.55E-07 |
| KCTD16 | -2.64788 | -1.71206 | 6.39E-07 | 1.09E-06 |
| FN1 | -3.43516 | 3.599179 | 8.67E-07 | 1.47E-06 |
| TEPP | -4.38625 | -2.34524 | 8.86E-07 | 1.5E-06 |
| THEG | -5.94105 | -2.54914 | 9.46E-07 | 1.6E-06 |
| C9orf153 | -3.61671 | -2.30773 | 9.5E-07 | 1.61E-06 |
| GREM1 | -2.43259 | -1.71199 | 1.03E-06 | 1.75E-06 |
| GPT | -2.73659 | -1.81281 | 1.1E-06 | 1.86E-06 |
| HIST1H3A | -5.93932 | -2.54936 | 1.13E-06 | 1.9E-06 |
| HIST2H3D | -2.36881 | -1.50352 | 1.15E-06 | 1.93E-06 |
| ITGA11 | -2.87459 | -1.92284 | 1.3E-06 | 2.19E-06 |
| CLDN4 | -2.38074 | 0.127793 | 1.51E-06 | 2.53E-06 |
| PLCXD2 | -4.46372 | -2.27343 | 1.55E-06 | 2.6E-06 |
| HIST2H2AB | -2.99496 | -2.06957 | 1.61E-06 | 2.69E-06 |
| SP8 | -5.87316 | -2.59342 | 1.71E-06 | 2.86E-06 |
| KCTD8 | -5.86923 | -2.59393 | 1.76E-06 | 2.93E-06 |
| PAPPA2 | -4.42607 | -2.30829 | 1.88E-06 | 3.13E-06 |
| ATP2C2 | -3.21357 | -2.20116 | 1.88E-06 | 3.13E-06 |
| CNGB3 | -5.89797 | -2.59224 | 1.95E-06 | 3.25E-06 |
| KCNU1 | -6.14948 | -2.46195 | 2.08E-06 | 3.46E-06 |
| HKDC1 | -2.45912 | -1.68698 | 2.15E-06 | 3.57E-06 |
| PTGFR | -4.27817 | -2.42247 | 2.17E-06 | 3.61E-06 |
| B3GNT3 | -3.34992 | -2.10228 | 2.17E-06 | 3.61E-06 |
| TEX13B | -4.26546 | -2.42322 | 2.79E-06 | 4.61E-06 |
| IL31RA | -2.94654 | -2.10186 | 2.96E-06 | 4.88E-06 |
| COLCA2 | -5.87727 | -2.59348 | 3.17E-06 | 5.21E-06 |
| CSMD3 | -5.8036 | -2.63912 | 3.77E-06 | 6.17E-06 |
| EYS | -5.79126 | -2.64033 | 3.82E-06 | 6.26E-06 |
| HIF3A | -3.26782 | -2.16596 | 4.01E-06 | 6.56E-06 |
| CDHR3 | -2.64227 | -1.54824 | 4.16E-06 | 6.8E-06 |
| MYO7A | -2.8662 | -1.68773 | 5.21E-06 | 8.47E-06 |
| C4BPA | -3.79109 | -2.16713 | 5.75E-06 | 9.33E-06 |
| C1orf110 | -5.71751 | -2.68748 | 6.1E-06 | 9.88E-06 |
| C6orf141 | -5.71751 | -2.68748 | 6.1E-06 | 9.89E-06 |
| CDH3 | -2.90077 | -2.1339 | 6.13E-06 | 9.94E-06 |
| HIST1H2AB | -2.53248 | -1.97787 | 6.18E-06 | 1E-05 |
| ASPG | -5.78668 | -2.64079 | 7.03E-06 | 1.14E-05 |
| OR8D1 | -5.73031 | -2.6863 | 7.62E-06 | 1.23E-05 |
| GS1-259H13.11 | -2.0695 | -1.59447 | 7.81E-06 | 1.26E-05 |
| PNMT | -3.60793 | -2.3088 | 7.93E-06 | 1.28E-05 |
| NR3C2 | -2.89337 | -2.13539 | 9.01E-06 | 1.45E-05 |
| PROC | -2.76631 | 0.531021 | 9.09E-06 | 1.46E-05 |
| MTMR7 | -5.72601 | -2.6868 | 9.1E-06 | 1.46E-05 |
| TM4SF19-TCTEX1D2 | -4.13605 | -2.50587 | 1.06E-05 | 1.69E-05 |
| GJB7 | -5.63824 | -2.73626 | 1.19E-05 | 1.91E-05 |
| HMSD | -5.64022 | -2.73603 | 1.21E-05 | 1.92E-05 |
| TXNDC2 | -2.64963 | -2.06995 | 1.23E-05 | 1.96E-05 |
| CD163L1 | -5.66964 | -2.7346 | 1.24E-05 | 1.99E-05 |
| SPINK7 | -5.64049 | -2.73601 | 1.25E-05 | 1.99E-05 |
| IPCEF1 | -5.71281 | -2.68796 | 1.25E-05 | 1.99E-05 |
| PCDHGA9 | -2.17107 | -1.52703 | 1.35E-05 | 2.14E-05 |
| PDCD1LG2 | -5.7092 | -2.68821 | 1.35E-05 | 2.16E-05 |
| TNFSF13B | -5.64848 | -2.7353 | 1.36E-05 | 2.17E-05 |
| RARRES1 | -4.16258 | -2.50449 | 1.43E-05 | 2.27E-05 |
| EHF | -4.28783 | -2.38638 | 1.45E-05 | 2.3E-05 |
| RP11-156P1.2 | -2.63685 | -2.0712 | 1.55E-05 | 2.45E-05 |
| CTGLF11P | -5.64174 | -2.73598 | 1.72E-05 | 2.73E-05 |
| FIGF | -3.29265 | -2.50648 | 1.81E-05 | 2.86E-05 |
| SLITRK4 | -3.49308 | -2.38277 | 2.14E-05 | 3.37E-05 |
| KRTAP4-1 | -5.79844 | -2.68486 | 2.33E-05 | 3.66E-05 |
| CRIP3 | -5.6308 | -2.73699 | 2.48E-05 | 3.89E-05 |
| ASTN1 | -5.77642 | -2.64048 | 2.57E-05 | 4.02E-05 |
| RNF39 | -5.62133 | -2.73747 | 3.02E-05 | 4.71E-05 |
| OVOS2 | -2.18533 | -1.73628 | 3.02E-05 | 4.72E-05 |
| ANXA8 | -2.95145 | -1.89181 | 3.04E-05 | 4.75E-05 |
| CD53 | -3.41991 | -2.42453 | 3.25E-05 | 5.06E-05 |
| GUCY1A2 | -5.57616 | -2.78554 | 3.52E-05 | 5.47E-05 |
| AIRE | -2.54918 | -2.13365 | 3.8E-05 | 5.9E-05 |
| 43900 | -4.03315 | -2.59257 | 4.75E-05 | 7.33E-05 |
| FMOD | -5.54412 | -2.78771 | 4.88E-05 | 7.53E-05 |
| ATP8B1 | -2.29855 | -1.94839 | 5.02E-05 | 7.74E-05 |
| ARL14 | -4.0523 | -2.54999 | 5.38E-05 | 8.27E-05 |
| ARHGEF37 | -3.11745 | -2.27183 | 5.42E-05 | 8.34E-05 |
| ACADL | -5.59686 | -2.73798 | 5.52E-05 | 8.49E-05 |
| FLRT1 | -2.9455 | -1.43803 | 6.04E-05 | 9.26E-05 |
| ELN | -3.36042 | -2.46436 | 6.11E-05 | 9.37E-05 |
| FAM26F | -3.14505 | -2.59396 | 6.31E-05 | 9.67E-05 |
| HRCT1 | -2.07804 | -1.68753 | 6.31E-05 | 9.68E-05 |
| BTBD19 | -2.68053 | -2.27263 | 7.51E-05 | 0.000115 |
| MMP13 | -2.20069 | -2.00859 | 8.06E-05 | 0.000123 |
| C3orf67 | -5.46459 | -2.83929 | 8.08E-05 | 0.000123 |
| PCDHGA5 | -2.22333 | -1.84052 | 8.42E-05 | 0.000128 |
| BEST3 | -5.4608 | -2.83957 | 8.59E-05 | 0.000131 |
| ST6GALNAC1 | -5.36533 | -2.89391 | 8.59E-05 | 0.000131 |
| CEBPE | -3.34914 | -2.46535 | 9E-05 | 0.000137 |
| WDR86 | -5.45217 | -2.8403 | 9.36E-05 | 0.000142 |
| FAM183A | -5.45216 | -2.8403 | 9.36E-05 | 0.000142 |
| UBASH3A | -5.44695 | -2.84056 | 0.000102 | 0.000155 |
| CGB2 | -2.44985 | -1.98131 | 0.000121 | 0.000183 |
| ELANE | -3.95746 | -2.59577 | 0.000142 | 0.000214 |
| CHSY3 | -3.84914 | -2.68685 | 0.00016 | 0.00024 |
| ADGRG5 | -2.77041 | -2.20176 | 0.000163 | 0.000244 |
| ANOS1 | -5.36273 | -2.89417 | 0.000173 | 0.00026 |
| BEAN1 | -2.8046 | -2.46497 | 0.000174 | 0.00026 |
| FAM9B | -2.7198 | -2.23703 | 0.000179 | 0.000268 |
| NAV3 | -3.21613 | -2.5497 | 0.000182 | 0.000273 |
| DOCK2 | -5.36267 | -2.89411 | 0.00019 | 0.000284 |
| FAM83B | -3.83495 | -2.68783 | 0.000213 | 0.000318 |
| TMEM105 | -2.19952 | -2.16681 | 0.000213 | 0.000318 |
| GALNT5 | -3.74604 | -2.73621 | 0.000236 | 0.000351 |
| PCDHGA7 | -5.26106 | -2.95065 | 0.000249 | 0.00037 |
| TACSTD2 | -5.45666 | -2.83952 | 0.000263 | 0.00039 |
| NBPF4 | -5.36089 | -2.89419 | 0.000263 | 0.00039 |
| MMP23B | -2.54238 | -2.34683 | 0.000265 | 0.000394 |
| ADAMTS8 | -5.29847 | -2.94918 | 0.000289 | 0.000428 |
| CDHR5 | -3.81421 | -2.68907 | 0.000305 | 0.000452 |
| LDLRAD2 | -2.75768 | -2.46689 | 0.000327 | 0.000482 |
| ALOX5AP | -5.15335 | -3.00913 | 0.000329 | 0.000485 |
| GAB3 | -3.20979 | -2.55042 | 0.000334 | 0.000493 |
| PFN4 | -5.25815 | -2.95082 | 0.000341 | 0.000502 |
| ZIC1 | -2.53228 | -2.34778 | 0.00035 | 0.000515 |
| LINGO2 | -5.15526 | -3.00916 | 0.000373 | 0.000548 |
| GALNT3 | -2.60121 | -2.30853 | 0.00039 | 0.000572 |
| NXPE2 | -5.24022 | -2.95181 | 0.000399 | 0.000585 |
| BTC | -5.41124 | -2.84101 | 0.000403 | 0.000591 |
| TMEM156 | -3.19755 | -2.55113 | 0.000416 | 0.000609 |
| SLC8A1 | -2.7849 | -2.46452 | 0.00042 | 0.000615 |
| ASCL5 | -3.66332 | -2.78623 | 0.000446 | 0.000652 |
| PLCH2 | -2.19847 | -2.16813 | 0.000508 | 0.000739 |
| CATSPERD | -5.30077 | -2.94958 | 0.000561 | 0.000815 |
| CTD-2616J11.11 | -2.56138 | -2.59454 | 0.000578 | 0.000838 |
| IL17REL | -5.14807 | -3.00961 | 0.000613 | 0.000889 |
| DNMT3L | -5.14786 | -3.00964 | 0.000669 | 0.000966 |
| KCNF1 | -5.14786 | -3.00964 | 0.000669 | 0.000966 |
| GRM8 | -3.5645 | -2.83925 | 0.000694 | 0.001001 |
| EPHA3 | -3.56243 | -2.83948 | 0.000712 | 0.001026 |
| PLCL1 | -5.143 | -3.00989 | 0.000787 | 0.001131 |
| ARL14EPL | -5.40305 | -2.8931 | 0.000815 | 0.00117 |
| ALS2CR12 | -2.53738 | -2.34686 | 0.000894 | 0.00128 |
| PCDHGB3 | -5.06671 | -3.06966 | 0.000981 | 0.001399 |
| MICALCL | -5.05629 | -3.07012 | 0.001091 | 0.001551 |
| WIF1 | -2.9662 | -2.68711 | 0.001125 | 0.001598 |
| MFSD7 | -2.34451 | -2.46608 | 0.001164 | 0.001652 |
| TMC5 | -3.55813 | -2.8395 | 0.001252 | 0.00177 |
| TXLNB | -3.5601 | -2.83973 | 0.001253 | 0.001772 |
| SPTBN5 | -2.78206 | -2.78822 | 0.00131 | 0.001849 |
| HIST1H3J | -3.60896 | -2.7884 | 0.001343 | 0.001893 |
| PLG | -4.90894 | -3.1344 | 0.001377 | 0.001941 |
| GRK7 | -2.41059 | -2.42363 | 0.001435 | 0.002019 |
| SDPR | -2.2454 | -2.30781 | 0.001452 | 0.002042 |
| NR2E3 | -2.25329 | -2.3073 | 0.001492 | 0.002096 |
| HMCN1 | -2.00736 | -2.27268 | 0.001516 | 0.002127 |
| DGKI | -3.55458 | -2.8404 | 0.001568 | 0.002198 |
| CYTH4 | -4.90906 | -3.13468 | 0.001608 | 0.002254 |
| LEKR1 | -2.02243 | -2.27145 | 0.001919 | 0.002676 |
| GALNT15 | -2.23037 | -2.31153 | 0.001945 | 0.002711 |
| CLEC18B | -2.19815 | -2.54902 | 0.002214 | 0.003075 |
| PCDHGA4 | -4.88898 | -3.13561 | 0.002391 | 0.003315 |
| C5orf46 | -4.75137 | -3.20211 | 0.002406 | 0.003335 |
| PARVG | -4.89187 | -3.13539 | 0.002432 | 0.00337 |
| SFTPC | -4.89186 | -3.13539 | 0.002435 | 0.003374 |
| ERBB4 | -2.33938 | -2.46414 | 0.002449 | 0.00339 |
| CADM2 | -3.34465 | -2.95078 | 0.002485 | 0.003438 |
| FOXB1 | -4.75623 | -3.20186 | 0.002504 | 0.003464 |
| PCDH12 | -4.76155 | -3.20163 | 0.002585 | 0.003571 |
| KRT78 | -3.3619 | -2.94976 | 0.002774 | 0.003825 |
| SCN1A | -2.61471 | -2.55016 | 0.002962 | 0.004076 |
| KIAA1024L | -3.42782 | -2.89506 | 0.003032 | 0.004169 |
| CD226 | -2.0526 | -2.42419 | 0.003052 | 0.004197 |
| CYBB | -2.2919 | -2.73645 | 0.003115 | 0.00428 |
| NKAIN4 | -2.47165 | -2.64001 | 0.003352 | 0.004594 |
| HTR3A | -2.47601 | -2.63954 | 0.003437 | 0.004708 |
| CHRNB4 | -4.89876 | -3.13508 | 0.003522 | 0.004819 |
| SPOCK3 | -2.87645 | -2.73629 | 0.003553 | 0.004862 |
| AP000866.1 | -2.10454 | -2.59422 | 0.003596 | 0.004918 |
| RP11-216L13.16 | -2.80357 | -2.78585 | 0.0036 | 0.004923 |
| HOXA2 | -2.33207 | -2.46586 | 0.00375 | 0.005121 |
| THBD | -2.85512 | -2.78537 | 0.003936 | 0.005368 |
| HCAR3 | -4.84764 | -3.13637 | 0.004302 | 0.005851 |
| DNAH11 | -3.2283 | -3.00976 | 0.004417 | 0.006003 |
| PRSS57 | -3.33486 | -2.95103 | 0.004485 | 0.006094 |
| KLRF1 | -4.74833 | -3.20234 | 0.004646 | 0.006304 |
| AK5 | -3.23733 | -3.00928 | 0.004693 | 0.006366 |
| SLC6A7 | -4.7411 | -3.20282 | 0.004746 | 0.006435 |
| MILR1 | -4.59248 | -3.27237 | 0.004783 | 0.006484 |
| LRRC15 | -3.24821 | -3.00877 | 0.004893 | 0.006623 |
| CTD-2287O16.3 | -4.73372 | -3.2031 | 0.005108 | 0.006905 |
| EVA1A | -2.68037 | -2.83965 | 0.005278 | 0.007125 |
| TCN1 | -2.18329 | -2.78717 | 0.005436 | 0.007327 |
| ST6GALNAC2 | -5.00719 | -3.01181 | 0.005609 | 0.007554 |
| RIMBP3C | -3.24673 | -3.00829 | 0.005755 | 0.007743 |
| GAST | -4.71299 | -3.20358 | 0.005903 | 0.007933 |
| MYO18B | -4.71295 | -3.20358 | 0.005906 | 0.007936 |
| EVI2B | -4.62967 | -3.27166 | 0.006266 | 0.008406 |
| NLRC3 | -2.38676 | -2.68738 | 0.00647 | 0.008669 |
| IDO1 | -4.73292 | -3.20279 | 0.006566 | 0.008792 |
| INSRR | -2.18966 | -2.54812 | 0.006637 | 0.00888 |
| CFB | -3.09239 | -3.07055 | 0.007774 | 0.010363 |
| TULP1 | -2.44749 | -2.95161 | 0.007864 | 0.010476 |
| INPP5D | -3.20872 | -3.01024 | 0.008018 | 0.010672 |
| KRTAP2-3 | -4.73865 | -3.20254 | 0.008736 | 0.011594 |
| HSFX1 | -2.17965 | -2.7879 | 0.008776 | 0.011645 |
| C3orf36 | -4.58447 | -3.27285 | 0.008945 | 0.011865 |
| TENM2 | -4.58447 | -3.27285 | 0.008947 | 0.011865 |
| KRT222 | -4.58813 | -3.27263 | 0.009069 | 0.012023 |
| WISP1 | -4.58891 | -3.2726 | 0.009211 | 0.012203 |
| S1PR4 | -4.57172 | -3.27359 | 0.00932 | 0.012341 |
| PRUNE2 | -3.09906 | -3.07035 | 0.009334 | 0.012358 |
| ARL13A | -4.58453 | -3.27288 | 0.009366 | 0.012398 |
| CGB5 | -4.57543 | -3.27336 | 0.009424 | 0.01247 |
| ST18 | -4.57542 | -3.27336 | 0.009429 | 0.012475 |
| GCM1 | -2.57012 | -2.89445 | 0.009437 | 0.012483 |
| FAM189A2 | -3.20268 | -3.01098 | 0.009774 | 0.012906 |
| PAGE1 | -4.58559 | -3.27282 | 0.009909 | 0.01308 |
| C2orf88 | -2.17241 | -2.54999 | 0.010046 | 0.013256 |
| C7orf33 | -4.4185 | -3.34627 | 0.010048 | 0.013258 |
| KRT34 | -4.55979 | -3.27384 | 0.01021 | 0.013462 |
| CYP4X1 | -4.45545 | -3.34579 | 0.012426 | 0.016277 |
| AIM2 | -4.47354 | -3.34553 | 0.013118 | 0.017152 |
| C2orf74 | -3.08853 | -3.07174 | 0.013736 | 0.017924 |
| AC006449.2 | -2.17665 | -3.07139 | 0.013922 | 0.01815 |
| SAA2 | -2.17666 | -3.07139 | 0.013926 | 0.018154 |
| ESRRG | -2.00204 | -2.63997 | 0.014679 | 0.019093 |
| FAM178B | -2.44798 | -2.95065 | 0.015206 | 0.019757 |
| RP11-145E5.5 | -2.08418 | -2.59523 | 0.015353 | 0.01994 |
| CSRNP3 | -2.01386 | -2.63971 | 0.015884 | 0.020606 |
| SLC2A5 | -2.05596 | -2.84122 | 0.016905 | 0.021881 |
| MMP7 | -4.40332 | -3.34672 | 0.017319 | 0.022393 |
| IL20 | -4.39647 | -3.3472 | 0.017329 | 0.022403 |
| C12orf79 | -4.40392 | -3.34675 | 0.017752 | 0.0229 |
| SERPINB4 | -4.38324 | -3.34769 | 0.018645 | 0.024007 |
| SLC22A14 | -2.06035 | -2.59619 | 0.01987 | 0.025523 |
| EQTN | -4.54245 | -3.3453 | 0.019896 | 0.02555 |
| DIRAS3 | -4.39222 | -3.34718 | 0.020793 | 0.026664 |
| RGS18 | -2.52197 | -2.89442 | 0.024144 | 0.030782 |
| RGN | -2.9389 | -3.13529 | 0.024475 | 0.031186 |
| CTD-2105E13.6 | -2.78874 | -3.20202 | 0.025006 | 0.031831 |
| SAA2-SAA4 | -2.93394 | -3.136 | 0.025087 | 0.031929 |
| HAMP | -2.05987 | -2.83885 | 0.026256 | 0.033341 |
| LGALS7B | -2.31562 | -3.00873 | 0.027059 | 0.03432 |
| SCN3B | -2.33615 | -3.00868 | 0.029645 | 0.037427 |
| SPATA9 | -2.93825 | -3.13594 | 0.031673 | 0.039904 |
| TRIM10 | -2.8719 | -3.13676 | 0.039627 | 0.049475 |

**Table S2.** Co-expression genes with GJB1 in Ovarian cancer.

| Symbol | Correlation | Pvalue |
| --- | --- | --- |
| TMEM106A | -0.979 | 0.000672 |
| COL13A1 | 0.979 | 0.000678 |
| EPSTI1 | -0.979 | 0.000632 |
| CRLF1 | -0.976 | 0.00083 |
| PRRX2 | -0.992 | 9.84E-05 |
| ZC3H12B | 0.98 | 0.000601 |
| PGBD5 | 0.976 | 0.000856 |
| MID2 | 0.985 | 0.000329 |
| DYSF | 0.998 | 6.06E-06 |
| EMID1 | 0.997 | 1.68E-05 |
| SNAPC2 | 1 | 2.31E-07 |
| KCNQ2 | 1 | 4.85E-08 |
| LINC00116 | -0.991 | 0.000108 |
| AMOTL1 | -0.998 | 6.83E-06 |
| CGN | 0.998 | 6.00E-06 |
| LRRC56 | 0.999 | 2.75E-06 |
| ABLIM2 | -0.978 | 0.000703 |
| C10orf11 | -0.994 | 5.13E-05 |
| ASCL2 | 0.98 | 0.000625 |
| PALMD | -0.993 | 7.62E-05 |
| TMEM121 | 0.998 | 4.79E-06 |
| SHC2 | 0.999 | 2.74E-06 |
| KATNAL2 | -0.995 | 3.61E-05 |
| ALDH1A1 | 0.995 | 3.39E-05 |
| DSCR8 | -0.994 | 4.68E-05 |
| ANKRD20A1 | 0.995 | 3.35E-05 |
| SLC36A4 | -0.997 | 1.52E-05 |
| TEX15 | 0.999 | 1.72E-06 |
| GSTA4 | 0.998 | 4.59E-06 |
| VAMP8 | 1 | 7.26E-08 |
| RSPH1 | 0.991 | 0.000131 |
| KIAA1257 | 0.983 | 0.000418 |
| COL1A1 | -0.997 | 1.83E-05 |
| HIVEP3 | 0.989 | 0.000185 |
| OTUB2 | 0.979 | 0.00066 |
| CAPG | -0.994 | 4.69E-05 |
| PLEKHH1 | 0.998 | 7.37E-06 |
| RP1-66C13.4 | 0.985 | 0.000346 |
| PTPN5 | 0.986 | 0.000297 |
| ZNF671 | -0.99 | 0.000141 |
| FAM159B | 0.987 | 0.000245 |
| FADS2 | 0.999 | 1.62E-06 |
| ELOVL4 | 0.992 | 0.000108 |
| GALNT16 | 0.999 | 1.09E-06 |
| LYPD1 | -0.982 | 0.000478 |
| PALM3 | 0.99 | 0.000159 |
| ZNF32 | 0.999 | 8.01E-07 |
| GPR1 | -0.991 | 0.000126 |
| ATF7IP2 | 0.983 | 0.000433 |
| THNSL2 | 0.996 | 2.46E-05 |
| LTBP2 | -0.977 | 0.000806 |
| 43891 | -0.998 | 6.98E-06 |
| KHDC1 | -0.98 | 0.000599 |
| PANO1 | 0.99 | 0.000136 |
| GGT7 | 0.99 | 0.000149 |
| KIF5A | 0.995 | 3.70E-05 |
| THBS1 | -0.995 | 3.57E-05 |
| HEG1 | -0.998 | 4.56E-06 |
| ANPEP | -0.995 | 3.36E-05 |
| IL31RA | -0.984 | 0.000367 |
| ITGA1 | -0.996 | 2.68E-05 |
| FAM171A1 | 0.998 | 4.32E-06 |
| SNX19 | -0.994 | 5.53E-05 |
| FAS | 0.996 | 1.88E-05 |
| PLAU | -0.996 | 2.26E-05 |
| HLX | -0.988 | 0.000199 |
| ABAT | 0.994 | 4.98E-05 |
| ZNF551 | 0.998 | 8.83E-06 |
| ROPN1L | 0.985 | 0.000353 |
| SULT2B1 | 0.997 | 1.09E-05 |
| GPR173 | -0.993 | 7.12E-05 |
| NCOR2 | -0.995 | 4.13E-05 |
| NCEH1 | -0.991 | 0.000134 |
| PNMAL1 | 0.994 | 5.17E-05 |
| TAS1R3 | -0.986 | 0.000302 |
| KRT9 | -0.984 | 0.00037 |
| B3GNT4 | 0.984 | 0.000379 |
| DGKQ | 0.995 | 4.04E-05 |
| AP1M2 | 1 | 3.02E-08 |
| DACT3 | 0.998 | 8.23E-06 |
| GLUL | -0.997 | 1.51E-05 |
| PPFIA4 | 0.998 | 7.31E-06 |
| STYK1 | 0.995 | 3.66E-05 |
| MUC3A | 0.993 | 7.26E-05 |
| TFPI2 | -0.993 | 8.06E-05 |
| FCGR2A | -0.999 | 6.58E-07 |
| ZNF217 | 0.984 | 0.000362 |
| IER3 | -0.998 | 8.06E-06 |
| ELP2 | -0.999 | 2.35E-06 |
| TWIST1 | -0.991 | 0.000129 |
| BCAT1 | 0.996 | 1.98E-05 |
| CDK18 | 0.998 | 9.03E-06 |
| CHFR | 0.991 | 0.000127 |
| SOWAHA | 0.984 | 0.000403 |
| HOXB4 | 0.999 | 1.54E-06 |
| AKR1C3 | -0.987 | 0.000243 |
| MMP2 | -0.996 | 2.82E-05 |
| NFIA | -0.994 | 6.23E-05 |
| HSD17B14 | 0.999 | 1.29E-06 |
| PPP2R2B | -0.998 | 6.19E-06 |
| PRDM1 | -0.992 | 0.000106 |
| ENTPD2 | -0.994 | 5.96E-05 |
| TRPM6 | 0.999 | 9.45E-07 |
| NR2F2 | -0.998 | 6.75E-06 |
| DHRS4 | -0.993 | 7.62E-05 |
| CA14 | 0.998 | 3.76E-06 |
| COL5A1 | -0.997 | 1.35E-05 |
| ZNF583 | 0.995 | 3.40E-05 |
| TMEM173 | -0.988 | 0.00022 |
| NUDT7 | 0.984 | 0.000362 |
| LYPD6 | -0.997 | 1.60E-05 |
| TNFAIP2 | -0.995 | 3.11E-05 |
| PRKAR2B | 0.982 | 0.000459 |
| GLI1 | 0.999 | 1.21E-06 |
| GRAMD1B | -0.996 | 2.17E-05 |
| KCNQ4 | 0.998 | 3.41E-06 |
| LYRM9 | 0.996 | 2.44E-05 |
| LAMP3 | 0.999 | 2.68E-06 |
| HOXB5 | 1 | 3.44E-07 |
| NT5E | -0.998 | 4.38E-06 |
| GPR176 | -0.98 | 0.0006 |
| RAB20 | -0.995 | 4.30E-05 |
| ACTC1 | -0.998 | 7.60E-06 |
| LCMT2 | -0.998 | 3.45E-06 |
| CALY | 0.993 | 7.81E-05 |
| ZC4H2 | 0.999 | 1.24E-06 |
| FAM24B | -0.979 | 0.000646 |
| EGFR | -0.999 | 1.46E-06 |
| ZNF415 | 0.993 | 7.99E-05 |
| EN2 | 0.997 | 1.66E-05 |
| PDE5A | 0.986 | 0.000277 |
| LRRC4B | 0.997 | 1.03E-05 |
| JPH3 | -0.997 | 1.20E-05 |
| SLC12A8 | -0.998 | 3.99E-06 |
| TRPV4 | 0.996 | 2.17E-05 |
| SERPINF1 | 1 | 1.38E-07 |
| GPR183 | -0.996 | 2.58E-05 |
| AHRR | -0.997 | 1.12E-05 |
| ARNTL | -0.994 | 6.16E-05 |
| TRIM47 | -0.992 | 9.32E-05 |
| C6orf141 | -0.993 | 7.23E-05 |
| CXCL1 | -0.99 | 0.000162 |
| TRIM16L | -0.995 | 4.48E-05 |
| ZNF808 | 0.999 | 2.60E-06 |
| LPAR3 | 0.984 | 0.000389 |
| CGB8 | -0.99 | 0.000151 |
| NMB | 1 | 3.44E-07 |
| DDO | 0.989 | 0.000184 |
| SUV39H1 | -0.992 | 9.11E-05 |
| SYNC | -0.995 | 4.32E-05 |
| DKK3 | -0.984 | 0.000375 |
| SRD5A1 | -0.992 | 0.000108 |
| SEMA3D | -0.991 | 0.000115 |
| ZFP14 | 0.997 | 1.17E-05 |
| FNDC4 | 0.999 | 8.59E-07 |
| PROCR | -0.997 | 1.78E-05 |
| FOLR2 | -0.994 | 5.16E-05 |
| CYSLTR2 | 1 | 4.89E-09 |
| NEIL1 | 0.995 | 4.14E-05 |
| RP11-152F13.10 | 0.994 | 5.73E-05 |
| WNT5A | -0.994 | 5.44E-05 |
| NAP1L3 | 0.999 | 1.84E-06 |
| HIST1H2BI | -0.985 | 0.000343 |
| RSPO3 | -0.993 | 6.36E-05 |
| HIST1H2AE | -0.993 | 8.15E-05 |
| CCDC109B | 0.997 | 1.16E-05 |
| SRRM3 | 0.997 | 1.27E-05 |
| FILIP1 | 0.996 | 2.03E-05 |
| SPRED3 | 0.999 | 2.52E-06 |
| PAG1 | -0.999 | 4.08E-07 |
| MPV17L | -0.994 | 5.11E-05 |
| RASSF6 | -0.989 | 0.000175 |
| CD302 | -0.984 | 0.000398 |
| FMN1 | -0.993 | 7.41E-05 |
| FHL2 | -0.997 | 9.82E-06 |
| DHX58 | 1 | 8.37E-08 |
| TRPA1 | -0.988 | 0.000226 |
| RAB39B | 0.999 | 1.10E-06 |
| MAFB | -0.981 | 0.000542 |
| RARRES2 | -0.995 | 3.06E-05 |
| CTSH | 1 | 8.12E-09 |
| RP11-277P12.6 | -0.987 | 0.000239 |
| CDYL2 | -0.998 | 6.63E-06 |
| NOV | -0.998 | 5.66E-06 |
| MLH1 | -0.998 | 8.24E-06 |
| S100P | -0.991 | 0.000126 |
| MEOX1 | 0.996 | 2.05E-05 |
| GSTM3 | -0.995 | 3.82E-05 |
| AIM1 | -0.982 | 0.000468 |
| CAND2 | 0.999 | 4.45E-07 |
| TXLNB | -0.988 | 0.000209 |
| B3GNT9 | -0.997 | 1.02E-05 |
| MFAP2 | -0.989 | 0.000196 |
| RTP3 | -0.979 | 0.000643 |
| CYP39A1 | -0.986 | 0.000286 |
| DACT1 | -0.98 | 0.000624 |
| FKBP7 | -0.993 | 8.20E-05 |
| SGIP1 | -0.989 | 0.000191 |
| COL25A1 | -0.993 | 7.73E-05 |
| AKAP14 | 0.992 | 8.68E-05 |
| MUSK | 0.998 | 6.49E-06 |
| SNX7 | -0.998 | 4.83E-06 |
| DUSP5 | -0.997 | 1.51E-05 |
| NACAD | -0.982 | 0.000494 |
| ODF3L2 | 0.999 | 3.31E-06 |
| ACSL1 | 0.985 | 0.000354 |
| RNF115 | 0.998 | 7.31E-06 |
| FAM19A5 | 0.975 | 0.000904 |
| FUT1 | -0.998 | 4.90E-06 |
| SH2D6 | -0.995 | 3.42E-05 |
| ACHE | 0.999 | 2.52E-06 |
| ADCK3 | -0.995 | 3.74E-05 |
| SMIM3 | 0.998 | 8.21E-06 |
| ANKH | -0.996 | 2.17E-05 |
| EGFLAM | -0.978 | 0.000734 |
| NIPA1 | 0.996 | 2.43E-05 |
| QPRT | 0.998 | 7.54E-06 |
| TENM3 | -0.999 | 3.18E-06 |
| TMEM163 | 0.997 | 1.11E-05 |
| SUSD3 | -0.98 | 0.000575 |
| GPR27 | 0.98 | 0.000572 |
| ATXN1 | -0.996 | 2.39E-05 |
| SLC38A4 | 0.979 | 0.00063 |
| MYCL | 0.994 | 5.80E-05 |
| SPINK6 | -0.996 | 2.02E-05 |
| C8orf88 | -0.993 | 8.19E-05 |
| FRAT2 | -0.996 | 2.66E-05 |
| GLIPR1L2 | -0.989 | 0.000184 |
| ZG16B | -0.991 | 0.000134 |
| LAT2 | -0.977 | 0.000777 |
| IL10RA | 0.991 | 0.000118 |
| FN3K | 0.998 | 7.31E-06 |
| SPRY2 | 0.997 | 1.45E-05 |
| TGFBR3 | -0.996 | 2.41E-05 |
| HNMT | -0.995 | 3.08E-05 |
| SEMA3A | -0.994 | 5.99E-05 |
| GBP4 | 0.995 | 4.08E-05 |
| SNX32 | 0.994 | 6.04E-05 |
| ARMCX4 | 0.98 | 0.000593 |
| GPC3 | 0.988 | 0.0002 |
| BACE1 | -0.99 | 0.000157 |
| PAPLN | -0.991 | 0.000117 |
| SIX3 | 0.992 | 0.000101 |
| MPDZ | 0.993 | 6.41E-05 |
| MYH10 | 0.996 | 2.33E-05 |
| ZIC2 | -0.998 | 9.21E-06 |
| SLC7A2 | -0.998 | 3.71E-06 |
| ARL4A | 0.996 | 2.66E-05 |
| PDE8B | -0.979 | 0.000648 |
| PTGES3L | 0.995 | 3.58E-05 |
| CORIN | -0.984 | 0.000368 |
| PTGES | -0.995 | 4.45E-05 |
| ZNF425 | 0.994 | 5.36E-05 |
| GPR37 | -0.993 | 6.39E-05 |
| ZNF582 | 0.981 | 0.000532 |
| CTD-2006C1.10 | 0.975 | 0.000914 |
| CLIP4 | 0.996 | 2.13E-05 |
| C15orf65 | 0.99 | 0.000149 |
| ZNF280B | 0.994 | 5.34E-05 |
| JAKMIP1 | 0.992 | 0.000101 |
| SLFN5 | -0.993 | 7.30E-05 |
| FAM105A | -0.997 | 1.04E-05 |
| GAP43 | -0.987 | 0.000256 |
| TM7SF2 | 1 | 6.46E-08 |
| ANXA3 | -0.996 | 2.82E-05 |
| NAA16 | -0.983 | 0.000408 |
| RP1-37E16.12 | 0.997 | 1.09E-05 |
| ZNF83 | 0.996 | 2.76E-05 |
| SGK1 | -0.998 | 7.49E-06 |
| FAM127C | -0.996 | 2.49E-05 |
| FN1 | -0.988 | 0.000226 |
| HOXC11 | -0.998 | 4.85E-06 |
| PCSK4 | 0.992 | 9.59E-05 |
| ZNF594 | -0.998 | 6.69E-06 |
| ADAMTS7 | 0.978 | 0.00073 |
| NTN1 | 0.999 | 7.47E-07 |
| CCDC74B | 0.997 | 1.23E-05 |
| SECTM1 | -0.995 | 3.80E-05 |
| C17orf50 | 0.985 | 0.000343 |
| HSPG2 | -0.983 | 0.000434 |
| IFT88 | 0.997 | 1.34E-05 |
| GIPR | 0.996 | 2.01E-05 |
| SESN3 | -0.989 | 0.000185 |
| IL24 | -0.992 | 9.27E-05 |
| TAS2R43 | 0.995 | 3.70E-05 |
| PLS1 | 0.991 | 0.000131 |
| CCT5 | -0.999 | 2.26E-06 |
| CCDC122 | -0.998 | 4.82E-06 |
| KCTD13 | 0.997 | 1.37E-05 |
| TFF2 | -0.997 | 1.07E-05 |
| MAPK8IP2 | 0.997 | 1.27E-05 |
| SGCE | -0.998 | 7.57E-06 |
| SEMA6C | 0.982 | 0.000483 |
| FAM72A | 0.998 | 6.94E-06 |
| ETS2 | -0.997 | 1.09E-05 |
| PDGFRL | 0.997 | 1.02E-05 |
| FOXL1 | -0.996 | 2.38E-05 |
| STXBP6 | -0.991 | 0.000135 |
| NLRP2 | 0.996 | 2.56E-05 |
| PDGFRB | -0.996 | 2.11E-05 |
| LRP1 | 0.997 | 1.18E-05 |
| SYBU | -0.997 | 1.50E-05 |
| C1orf54 | 0.999 | 7.10E-07 |
| ZFP82 | 0.991 | 0.000121 |
| PBX1 | -0.993 | 7.55E-05 |
| MAPRE2 | -0.999 | 3.04E-06 |
| PID1 | -0.997 | 1.14E-05 |
| CYP4V2 | 0.988 | 0.000215 |
| TMEM139 | -0.987 | 0.000264 |
| BIRC3 | 0.978 | 0.000705 |
| CDKN1C | -0.997 | 1.36E-05 |
| FMNL1 | -0.991 | 0.000122 |
| C3orf80 | -0.977 | 0.000779 |
| CCDC136 | 0.999 | 3.34E-06 |
| MYOCD | -0.993 | 7.11E-05 |
| DRD4 | 0.98 | 0.000607 |
| IL7R | -0.993 | 6.75E-05 |
| NEFH | 0.995 | 3.03E-05 |
| S100A2 | -0.994 | 6.25E-05 |
| RUNX1 | -0.998 | 7.71E-06 |
| SYCP2 | 0.992 | 0.000108 |
| LRRC73 | 0.999 | 4.60E-07 |
| MGMT | 0.999 | 1.94E-06 |
| KRT17 | -0.998 | 7.52E-06 |
| ARL4C | -0.989 | 0.000184 |
| PRR5-ARHGAP8 | 0.999 | 1.43E-06 |
| ALPP | -0.99 | 0.000164 |
| GSAP | 0.991 | 0.000128 |
| ITPRIPL1 | 1 | 7.99E-08 |
| GIMAP2 | 0.999 | 2.70E-06 |
| TMSB4X | 0.983 | 0.000434 |
| REEP2 | 0.999 | 2.68E-06 |
| S100A3 | -0.995 | 3.79E-05 |
| ERGIC1 | -0.997 | 1.80E-05 |
| TMEM56 | 0.986 | 0.000299 |
| CNNM1 | 0.998 | 5.43E-06 |
| IL1B | -0.999 | 2.20E-06 |
| DOPEY2 | 0.993 | 7.62E-05 |
| ARHGAP31 | 0.998 | 5.22E-06 |
| GAL3ST1 | 0.989 | 0.000183 |
| GTF2IRD1 | -0.99 | 0.000143 |
| FAM47E-STBD1 | 0.998 | 8.33E-06 |
| PAX8 | -0.993 | 6.89E-05 |
| CREB3L1 | -0.989 | 0.000185 |
| CDCA7L | -0.998 | 5.31E-06 |
| ALX1 | -0.977 | 0.000794 |
| UBE2E2 | -0.997 | 1.33E-05 |
| OLFML2A | -0.994 | 5.31E-05 |
| AC004076.7 | -0.996 | 2.49E-05 |
| TRIP13 | -0.996 | 2.72E-05 |
| MGLL | -0.998 | 5.78E-06 |
| ARID5B | -0.996 | 2.82E-05 |
| WNT7B | -0.991 | 0.000126 |
| GALNT2 | -0.996 | 2.19E-05 |
| WDR78 | 0.999 | 1.15E-06 |
| GPSM3 | -0.984 | 0.000389 |
| RNF125 | -0.991 | 0.000126 |
| PLCE1 | 0.992 | 8.79E-05 |
| C3orf14 | 0.994 | 5.43E-05 |
| SORT1 | -0.995 | 4.33E-05 |
| C11orf53 | -0.975 | 0.000907 |
| IGFBP7 | -0.998 | 7.42E-06 |
| TMSB15A | 0.998 | 6.95E-06 |
| NABP1 | -0.997 | 1.04E-05 |
| C15orf52 | -0.998 | 6.92E-06 |
| LGALS3 | -0.997 | 1.13E-05 |
| CACNA2D2 | 0.997 | 1.66E-05 |
| EDA | 0.993 | 6.81E-05 |
| FAM219A | 0.998 | 7.66E-06 |
| ZNF521 | -0.982 | 0.00049 |
| EGR4 | 0.997 | 1.43E-05 |
| KCNC3 | 0.996 | 2.03E-05 |
| CAPN5 | 0.999 | 2.49E-06 |
| PPAP2B | -0.983 | 0.000415 |
| CCRN4L | 0.993 | 7.96E-05 |
| PCDHGA2 | -0.982 | 0.000488 |
| SH3BP1 | 1 | 5.43E-08 |
| CPS1 | -0.998 | 4.26E-06 |
| NAV3 | -0.987 | 0.000244 |
| PYCR1 | -0.99 | 0.000137 |
| FDCSP | -0.996 | 2.93E-05 |
| PDZK1 | 0.991 | 0.000127 |
| SDHAF4 | 0.992 | 9.31E-05 |
| HIST1H2AI | -0.974 | 0.000984 |
| DNALI1 | 0.997 | 9.40E-06 |
| ADAM12 | -0.996 | 2.96E-05 |
| CUL4A | -0.999 | 3.21E-06 |
| ZNF287 | 0.996 | 2.42E-05 |
| DPCR1 | 0.978 | 0.00072 |
| SERPINI1 | -0.989 | 0.000196 |
| HAS2 | -0.998 | 3.50E-06 |
| PTGS1 | -0.998 | 4.48E-06 |
| VCX3A | -0.979 | 0.000687 |
| RAET1E | -0.99 | 0.000164 |
| S100A14 | -0.994 | 5.34E-05 |
| ZNF608 | 0.993 | 6.84E-05 |
| ANG | 0.993 | 7.05E-05 |
| C4orf19 | -0.983 | 0.000453 |
| CYP4F22 | 0.975 | 0.000931 |
| POMT1 | 0.999 | 5.30E-07 |
| LMO2 | -0.997 | 1.06E-05 |
| GBP2 | 0.999 | 2.17E-06 |
| SLC30A4 | 0.994 | 5.18E-05 |
| CMYA5 | 0.979 | 0.000651 |
| CLMN | 0.995 | 3.11E-05 |
| DLL1 | 0.988 | 0.000208 |
| KRT8 | -0.996 | 1.93E-05 |
| CA2 | -0.995 | 4.17E-05 |
| C2orf50 | 0.992 | 9.73E-05 |
| METTL7A | -0.989 | 0.000185 |
| CD22 | -0.983 | 0.000429 |
| RP11-96O20.4 | 0.999 | 2.28E-06 |
| GAGE1 | -0.992 | 9.45E-05 |
| GPRASP2 | 0.994 | 5.97E-05 |
| ZNF773 | 0.998 | 3.94E-06 |
| OAS1 | 0.991 | 0.000113 |
| ENKUR | 0.98 | 0.000596 |
| NF2 | 0.998 | 3.49E-06 |
| EPDR1 | -0.998 | 7.93E-06 |
| C3orf18 | -0.994 | 4.61E-05 |
| ASB2 | 0.999 | 7.57E-07 |
| ZNF814 | 0.999 | 4.50E-07 |
| RNF182 | -0.978 | 0.000698 |
| ZNF558 | 0.995 | 4.42E-05 |
| KIAA1217 | -0.998 | 5.59E-06 |
| CNIH2 | 0.999 | 7.68E-07 |
| AHR | -0.979 | 0.000677 |
| RARRES3 | 1 | 5.95E-08 |
| SPAG1 | 0.988 | 0.000201 |
| TNK1 | -0.994 | 5.99E-05 |
| LGALS8 | 0.996 | 3.01E-05 |
| CTB-102L5.4 | -0.998 | 6.39E-06 |
| DNAH10OS | 0.98 | 0.000584 |
| GALNT14 | 0.991 | 0.000135 |
| CYSLTR1 | -0.993 | 7.33E-05 |
| RAB7B | 0.986 | 0.000308 |
| PHLDA2 | -0.991 | 0.00013 |
| SHOX2 | 1 | 2.39E-07 |
| ZNF878 | 0.988 | 0.000208 |
| SPOCK1 | -0.997 | 1.64E-05 |
| DOCK4 | -0.987 | 0.00025 |
| SNAI2 | -0.983 | 0.000439 |
| CATSPERG | 0.978 | 0.000723 |
| STK11 | 0.998 | 4.06E-06 |
| CCDC74A | 0.999 | 1.12E-06 |
| OSBPL7 | -0.99 | 0.000147 |
| UBE2L6 | 0.998 | 5.31E-06 |
| STAC | -0.991 | 0.000115 |
| GALNT4 | 0.989 | 0.000187 |
| TINAGL1 | -0.995 | 4.00E-05 |
| HTRA1 | -0.996 | 1.84E-05 |
| SEC14L4 | -0.983 | 0.000417 |
| TMC4 | 0.975 | 0.000936 |
| SNCG | -0.996 | 2.74E-05 |
| LRRC75B | 0.986 | 0.000306 |
| KIFC3 | -0.993 | 7.02E-05 |
| FAM92B | 0.996 | 2.00E-05 |
| TBC1D3D | -0.978 | 0.000745 |
| PCDHGC3 | 0.997 | 1.76E-05 |
| MAK | 0.986 | 0.000277 |
| TFAP2C | -0.994 | 4.83E-05 |
| DPPA2 | -0.993 | 7.14E-05 |
| PCDH7 | -0.996 | 2.74E-05 |
| RPL22L1 | 0.999 | 1.34E-06 |
| CD82 | -0.997 | 1.17E-05 |
| LIMCH1 | -0.985 | 0.000321 |
| ZNF527 | 0.975 | 0.000893 |
| MUC5AC | -0.986 | 0.000302 |
| S100A4 | -0.992 | 8.47E-05 |
| LBX1 | 0.997 | 1.19E-05 |
| CRYM | 0.996 | 2.88E-05 |
| COLGALT2 | 0.999 | 3.26E-06 |
| LIMS2 | 0.994 | 5.00E-05 |
| MSRA | 0.997 | 1.32E-05 |
| KYNU | -0.998 | 6.04E-06 |
| HPDL | -0.993 | 8.33E-05 |
| ZMYND15 | 0.983 | 0.000445 |
| ACOT4 | -0.99 | 0.000159 |
| IRF5 | -0.995 | 4.00E-05 |
| BEND4 | 0.995 | 3.10E-05 |
| SLC3A2 | -0.996 | 2.96E-05 |
| C1orf61 | 0.988 | 0.000199 |
| SLC35G2 | -0.997 | 1.40E-05 |
| MAGEH1 | 0.996 | 2.12E-05 |
| HBE1 | -0.998 | 3.69E-06 |
| CD160 | 0.998 | 3.72E-06 |
| CD36 | -0.995 | 3.11E-05 |
| SVEP1 | 0.983 | 0.000415 |
| FAM83G | -0.994 | 5.74E-05 |
| PCDH18 | 0.995 | 3.43E-05 |
| MYRF | 0.992 | 0.000107 |
| MTRR | -0.994 | 4.73E-05 |
| MAT1A | 0.993 | 8.22E-05 |
| MAGEA1 | -0.983 | 0.000435 |
| TNFRSF14 | 0.997 | 9.89E-06 |
| RSPH4A | 0.983 | 0.000427 |
| KIAA1456 | -0.99 | 0.000149 |
| CLSTN3 | 0.994 | 4.82E-05 |
| ECE1 | -0.992 | 8.47E-05 |
| ZNF471 | 0.978 | 0.000745 |
| SLC22A3 | -0.997 | 1.22E-05 |
| MAP3K7CL | -0.979 | 0.000651 |
| MGAT5B | -0.99 | 0.000161 |
| ADAMTS1 | 0.997 | 1.70E-05 |
| CD24 | -0.997 | 9.67E-06 |
| TET1 | 1 | 1.76E-07 |
| ITGA3 | -0.99 | 0.000152 |
| PCDHA13 | 0.989 | 0.000179 |
| 44079 | 1 | 4.27E-09 |
| FOXD2 | 0.994 | 4.55E-05 |
| IGFBP3 | -0.997 | 1.30E-05 |
| KLHL30 | -0.995 | 3.74E-05 |
| HIST1H4H | -0.997 | 1.64E-05 |
| TSPAN8 | -0.984 | 0.000401 |
| MYT1 | 0.996 | 2.04E-05 |
| WDTC1 | -0.994 | 5.41E-05 |
| BCHE | -0.992 | 0.000103 |
| CRB2 | -0.997 | 1.49E-05 |
| PPARGC1A | -0.995 | 4.49E-05 |
| ZBED6CL | -0.99 | 0.000141 |
| KIF12 | 0.976 | 0.000865 |
| LUM | -0.979 | 0.000678 |
| C4BPB | -0.99 | 0.000154 |
| NRIP3 | 0.993 | 6.46E-05 |
| BACH2 | -0.988 | 0.000206 |
| LTF | -0.984 | 0.000373 |
| ZNF22 | -0.998 | 8.31E-06 |
| HDAC4 | -0.997 | 1.32E-05 |
| MICB | 0.997 | 1.35E-05 |
| FOXF2 | -0.998 | 6.67E-06 |
| LONRF1 | 0.997 | 1.04E-05 |
| FSTL4 | -0.995 | 3.32E-05 |
| SHC4 | -0.99 | 0.000153 |
| CTXN1 | 0.994 | 4.76E-05 |
| GDF15 | -0.992 | 8.83E-05 |
| TMEM59L | 0.997 | 1.06E-05 |
| THRB | -0.993 | 8.18E-05 |
| TEX22 | 0.992 | 8.80E-05 |
| WSCD1 | -0.984 | 0.00039 |
| ST3GAL1 | -0.998 | 4.53E-06 |
| SPRY4 | 0.998 | 9.26E-06 |
| EFEMP1 | -0.998 | 5.32E-06 |
| DUSP18 | 0.993 | 6.61E-05 |
| HMGA2 | 0.986 | 0.000296 |
| PKIA | -0.98 | 0.000612 |
| PRTFDC1 | -0.989 | 0.000182 |
| ZNF555 | 0.997 | 1.66E-05 |
| VAX1 | 0.996 | 2.89E-05 |
| ANXA1 | 0.995 | 3.40E-05 |
| KCNK1 | -0.995 | 3.27E-05 |
| GOLGA8M | 0.988 | 0.000219 |
| USH1G | 0.985 | 0.00032 |
| GLP2R | -0.997 | 1.24E-05 |
| SH3D21 | 0.999 | 2.06E-06 |
| COLGALT1 | -0.993 | 6.66E-05 |
| SBSPON | -0.986 | 0.000284 |
| TMEM97 | -0.998 | 8.39E-06 |
| LAMC3 | -0.992 | 9.25E-05 |
| GRB10 | -0.993 | 6.44E-05 |
| ERAP2 | 0.999 | 1.55E-06 |
| HMSD | -0.988 | 0.000212 |
| DUSP15 | 0.984 | 0.000365 |
| PCID2 | -0.996 | 1.85E-05 |
| LRRC8E | -0.988 | 0.000232 |
| CCL28 | -0.988 | 0.000226 |
| WWOX | 0.995 | 4.34E-05 |
| CDCP1 | -0.976 | 0.000823 |
| PALM2 | -0.993 | 6.79E-05 |
| SOHLH2 | -0.974 | 0.000973 |
| BSN | 0.98 | 0.000593 |
| HSD17B2 | -0.998 | 8.37E-06 |
| SP9 | -0.976 | 0.000835 |
| ZNF570 | 0.998 | 7.36E-06 |
| SLC38A5 | -0.991 | 0.000115 |
| FAM155B | 0.987 | 0.000261 |
| GHR | 0.988 | 0.000201 |
| PLEKHA7 | -0.998 | 5.97E-06 |
| AC009336.19 | 0.975 | 0.00093 |
| PARD6B | 0.996 | 2.64E-05 |
| PDZRN3 | 0.981 | 0.000538 |
| LAMA2 | -0.978 | 0.000704 |
| CHGA | 0.995 | 3.09E-05 |
| DIS3 | -0.993 | 6.88E-05 |
| FAM84B | 0.996 | 1.91E-05 |
| PLCD1 | 0.999 | 8.30E-07 |
| CNTD1 | 0.983 | 0.000422 |
| ABCA3 | 0.999 | 2.89E-06 |
| PPP1R14B | -0.99 | 0.000149 |
| PAOX | 0.998 | 4.35E-06 |
| CDH13 | -0.991 | 0.000125 |
| TMEM30B | 0.985 | 0.000317 |
| SPTLC3 | -0.983 | 0.000423 |
| MPHOSPH8 | 0.995 | 3.69E-05 |
| NKX2-3 | 0.997 | 1.20E-05 |
| KLRC2 | -0.994 | 6.26E-05 |
| FRG2 | 0.982 | 0.000469 |
| CPQ | 0.995 | 3.07E-05 |
| ANO4 | -0.996 | 2.74E-05 |
| ADAL | -0.997 | 1.20E-05 |
| PPM1J | 0.99 | 0.000145 |
| MYLK | 0.982 | 0.000487 |
| MYO1E | -0.998 | 8.97E-06 |
| LCA5L | 0.978 | 0.000705 |
| COL8A1 | -0.998 | 6.49E-06 |
| HIST1H4E | -0.987 | 0.000244 |
| NLGN1 | 0.982 | 0.000508 |
| SNCB | 0.987 | 0.000242 |
| NEK11 | 0.993 | 8.28E-05 |
| CLMP | -0.996 | 2.23E-05 |
| ACTL8 | -0.995 | 3.99E-05 |
| GABRA3 | -0.996 | 2.73E-05 |
| STRA6 | -0.992 | 9.78E-05 |
| ADD2 | 0.993 | 8.39E-05 |
| THRA | -0.996 | 2.16E-05 |
| CHRNA9 | -0.991 | 0.000109 |
| BRSK1 | 0.998 | 3.61E-06 |
| FAM46B | 0.999 | 5.67E-07 |
| ENC1 | -0.998 | 8.38E-06 |
| ZNF667 | 0.99 | 0.000152 |
| RNF122 | 0.998 | 6.77E-06 |
| SLC41A2 | 0.982 | 0.000466 |
| OSMR | -0.997 | 1.25E-05 |
| SLC35F3 | -0.993 | 6.90E-05 |
| LRP3 | 0.998 | 3.84E-06 |
| C2CD4C | 0.998 | 6.85E-06 |
| MASP1 | -0.994 | 5.44E-05 |
| ECEL1 | -0.986 | 0.000289 |
| TIMP4 | -0.998 | 6.51E-06 |
| BAHCC1 | 0.998 | 3.90E-06 |
| PTPRB | -0.988 | 0.000199 |
| NLGN3 | 0.981 | 0.000529 |
| DLGAP1 | 0.992 | 9.55E-05 |
| RP11-385D13.1 | -0.998 | 3.67E-06 |
| ZNF835 | 0.994 | 4.93E-05 |
| SMIM5 | 0.988 | 0.000199 |
| MGST1 | -0.997 | 1.08E-05 |
| FABP3 | -0.997 | 1.58E-05 |
| FGF5 | 0.976 | 0.000855 |
| ZNF440 | 0.995 | 3.32E-05 |
| CRTC3 | -0.995 | 3.34E-05 |
| ACOT11 | 0.997 | 1.61E-05 |
| MAFK | -0.998 | 5.43E-06 |
| GNA15 | -0.989 | 0.000171 |
| ARMCX2 | -0.994 | 4.80E-05 |
| ZNF350 | 0.975 | 0.000912 |
| LYPD6B | -0.995 | 3.71E-05 |
| GGACT | -0.989 | 0.000178 |
| AQP3 | -0.998 | 9.29E-06 |
| KSR2 | 0.984 | 0.000387 |
| ZNF682 | 0.99 | 0.000138 |
| HSPA2 | -0.996 | 2.17E-05 |
| STON2 | -0.984 | 0.000362 |
| EPGN | -0.991 | 0.00012 |
| MCF2 | -0.995 | 3.42E-05 |
| WISP2 | -0.994 | 5.14E-05 |
| PDE2A | -0.993 | 7.69E-05 |
| LOX | -0.994 | 5.22E-05 |
| ZNF737 | 0.981 | 0.000533 |
| RNF208 | 0.999 | 1.76E-06 |
| PDE3A | -0.99 | 0.000165 |
| SLCO3A1 | -0.998 | 6.28E-06 |
| BEST4 | 0.975 | 0.000951 |
| VMAC | 0.997 | 1.05E-05 |
| BTBD16 | -0.978 | 0.000725 |
| NOTUM | 0.987 | 0.000235 |
| ZNF516 | 0.999 | 8.42E-07 |
| RP11-637O19.3 | 0.994 | 5.68E-05 |
| SYCE1L | -0.979 | 0.000664 |
| RGS16 | -0.997 | 1.63E-05 |
| ATP6V0A4 | -0.99 | 0.000154 |
| HYAL1 | -0.992 | 8.61E-05 |
| PSD4 | -0.994 | 5.07E-05 |
| GALNT6 | 0.993 | 8.07E-05 |
| VEGFC | -0.99 | 0.000156 |
| APOBEC3A | 0.995 | 3.53E-05 |
| HABP4 | 0.998 | 3.90E-06 |
| SPTB | 0.979 | 0.000647 |
| LANCL3 | -0.994 | 4.68E-05 |
| SCAMP5 | 0.999 | 2.04E-06 |
| HTR7 | 0.993 | 7.15E-05 |
| DET1 | 0.996 | 2.37E-05 |
| PDE7B | -0.998 | 4.28E-06 |
| BCL2 | 0.998 | 6.52E-06 |
| SPEF1 | 0.996 | 2.38E-05 |
| SLC18A2 | -0.989 | 0.000183 |
| PKP2 | -0.997 | 1.21E-05 |
| C6orf52 | 0.999 | 1.90E-06 |
| PHYHIP | -0.993 | 6.45E-05 |
| ASB9 | -0.989 | 0.000193 |
| LTC4S | 0.99 | 0.000159 |
| WAS | 0.995 | 3.94E-05 |
| ADARB1 | -0.997 | 1.09E-05 |
| SMAD2 | -0.996 | 2.57E-05 |
| IGFBP5 | -0.99 | 0.000138 |
| SLC4A11 | 0.999 | 6.75E-07 |
| SMAD7 | -0.984 | 0.000396 |
| PLA2G4C | 0.995 | 3.61E-05 |
| SH3GL3 | 0.981 | 0.000554 |
| OGDHL | 0.997 | 1.73E-05 |
| RADIL | 0.999 | 1.39E-06 |
| CCDC64 | 0.995 | 4.25E-05 |
| PALD1 | 0.997 | 1.70E-05 |
| RP11-722G7.1 | 0.994 | 4.60E-05 |
| SIM2 | -0.994 | 4.66E-05 |
| EN1 | 0.995 | 4.41E-05 |
| FMO4 | 0.999 | 1.74E-06 |
| IRF2 | 0.988 | 0.000201 |
| TEC | 0.979 | 0.000629 |
| RASIP1 | -0.987 | 0.00026 |
| IMPA2 | -0.993 | 6.63E-05 |
| KRT80 | -0.995 | 4.17E-05 |
| KIAA1467 | 0.997 | 9.73E-06 |
| DNAH17 | -0.98 | 0.000597 |
| WDR17 | 0.988 | 0.000217 |
| GRIN1 | 0.993 | 7.21E-05 |
| EPHA7 | -0.989 | 0.000195 |
| CMTM8 | 0.998 | 3.52E-06 |
| AMOT | 0.98 | 0.000574 |
| IER2 | -0.997 | 1.69E-05 |
| KCNG3 | 0.99 | 0.000136 |
| ZNF329 | 0.995 | 4.03E-05 |
| C11orf71 | 0.994 | 5.09E-05 |
| MMRN2 | -0.998 | 3.57E-06 |
| SRRM4 | -0.983 | 0.000448 |
| DMBX1 | 0.998 | 6.59E-06 |
| ZNF763 | 0.987 | 0.000248 |
| POPDC3 | 0.993 | 7.64E-05 |
| HRK | 0.99 | 0.000159 |
| SLC22A17 | 0.999 | 3.25E-06 |
| MAT2A | -0.995 | 3.96E-05 |
| SSH3 | -0.991 | 0.000132 |
| IFI16 | -0.995 | 3.26E-05 |
| SSX2IP | 0.992 | 8.97E-05 |
| SYNE4 | 0.999 | 9.15E-07 |
| KCNK3 | -0.991 | 0.000125 |
| FST | -0.98 | 0.000589 |
| DTNA | -0.998 | 3.57E-06 |
| VSTM2A | 0.996 | 2.57E-05 |
| COL4A5 | -0.995 | 3.35E-05 |
| SLC7A5 | -0.996 | 1.99E-05 |
| CCND3 | -0.983 | 0.00041 |
| NMU | 0.996 | 2.07E-05 |
| RGS20 | 0.995 | 4.42E-05 |
| CAMK2D | -0.986 | 0.000281 |
| UNC13D | -0.991 | 0.000127 |
| UNC5CL | 0.989 | 0.000171 |
| LDAH | -0.996 | 2.61E-05 |
| ITPRIP | -0.992 | 0.000106 |
| CRIM1 | -0.977 | 0.000786 |
| C11orf87 | 0.987 | 0.000248 |
| ANGPTL6 | 0.983 | 0.000411 |
| RWDD2B | 0.999 | 1.28E-06 |
| SMAP1 | -0.996 | 1.92E-05 |
| FAT1 | -0.999 | 1.94E-06 |
| NTNG2 | 0.976 | 0.00083 |
| KIF25 | -0.98 | 0.000613 |
| ZNF611 | 0.988 | 0.000211 |
| ZNF799 | 0.997 | 9.74E-06 |
| NPR1 | -0.984 | 0.000402 |
| LEF1 | -0.979 | 0.000658 |
| CA13 | -0.994 | 5.40E-05 |
| GPR19 | 0.985 | 0.000334 |
| GLMP | -0.991 | 0.000127 |
| OSBP2 | -0.992 | 9.04E-05 |
| HDGFRP3 | 0.994 | 5.38E-05 |
| TGFA | -0.996 | 2.90E-05 |
| ASPHD2 | 1 | 1.42E-07 |
| HOXD8 | -0.976 | 0.000884 |
| PITPNC1 | -0.996 | 2.27E-05 |
| EBF4 | 0.997 | 1.65E-05 |
| HIST1H2AH | -0.989 | 0.000183 |
| GALNT9 | -0.989 | 0.000173 |
| SEMA5A | -0.985 | 0.000344 |
| RP11-47I22.4 | -0.979 | 0.000658 |
| CYP4F11 | 0.992 | 9.93E-05 |
| GLUD2 | 0.997 | 1.74E-05 |
| AATK | 0.999 | 5.21E-07 |
| CRIP2 | 1 | 6.54E-08 |
| KLF7 | -0.996 | 2.87E-05 |
| TFAP2A | -0.993 | 7.84E-05 |
| FOXC2 | -0.994 | 4.83E-05 |
| FA2H | -0.985 | 0.000344 |
| ZC3H12A | -0.987 | 0.000271 |
| FXYD1 | 0.997 | 1.06E-05 |
| HACD4 | -0.98 | 0.000576 |
| PTPRH | 0.997 | 1.76E-05 |
| FBN1 | -0.996 | 2.64E-05 |
| HBZ | 0.99 | 0.00014 |
| ZDHHC15 | 0.98 | 0.000583 |
| IL15RA | 0.996 | 2.51E-05 |
| CDC42EP1 | -0.993 | 7.93E-05 |
| ATP8A1 | 0.996 | 1.98E-05 |
| ZNF862 | 0.991 | 0.00011 |
| SMN2 | -0.978 | 0.000698 |
| ZSCAN18 | 0.997 | 1.02E-05 |
| PKNOX2 | 0.988 | 0.0002 |
| AKAP6 | 0.989 | 0.000184 |
| ZNF219 | 0.994 | 5.24E-05 |
| OSBPL10 | -0.998 | 6.86E-06 |
| TMEM74B | 0.992 | 8.63E-05 |
| MYD88 | -0.999 | 2.28E-06 |
| SATB2 | -0.991 | 0.000109 |
| SLC44A1 | -0.995 | 3.80E-05 |
| SLC7A11 | -0.992 | 8.98E-05 |
| TBC1D3L | -0.975 | 0.000947 |
| ARHGEF9 | 0.998 | 3.93E-06 |
| KLK10 | 0.983 | 0.000433 |
| SERPINE2 | -0.998 | 4.20E-06 |
| TMEM2 | -0.999 | 2.93E-06 |
| FAM228B | 0.981 | 0.000525 |
| ZNF823 | 0.998 | 7.01E-06 |
| ZNF613 | 0.997 | 1.02E-05 |
| CGB7 | 0.999 | 4.34E-07 |
| LPAR1 | 0.998 | 5.55E-06 |
| CYP11A1 | -0.996 | 2.25E-05 |
| SGK223 | -0.991 | 0.000114 |
| ZNF518B | 0.998 | 5.96E-06 |
| PCSK1N | 0.998 | 8.22E-06 |
| EHHADH | -0.985 | 0.000348 |
| DBNDD1 | 0.999 | 1.10E-06 |
| RIPPLY2 | 0.996 | 2.37E-05 |
| ZNF385B | -0.987 | 0.000234 |
| INA | 0.998 | 4.25E-06 |
| SLC4A8 | 0.98 | 0.00057 |
| TBC1D12 | 0.992 | 8.51E-05 |
| IRAK2 | -0.996 | 1.86E-05 |
| MYO16 | -0.986 | 0.000283 |
| TGFB2 | -0.991 | 0.000111 |
| FAM134B | -0.993 | 8.11E-05 |
| SMIM1 | 0.982 | 0.000479 |
| SLC45A1 | 0.998 | 6.72E-06 |
| ZDHHC1 | 0.999 | 3.32E-06 |
| WDR72 | -0.977 | 0.000793 |
| ZNF730 | 0.98 | 0.000602 |
| FAM86B1 | 0.996 | 2.27E-05 |
| SOX4 | -0.988 | 0.00022 |
| NPAS4 | 0.994 | 5.06E-05 |
| ZNF25 | 0.998 | 8.01E-06 |
| NPAS1 | 1 | 8.77E-08 |
| SHISA8 | 0.99 | 0.000143 |
| ZNF300 | -0.987 | 0.000262 |
| SOX7 | -0.993 | 7.20E-05 |
| CYFIP2 | -0.994 | 5.53E-05 |
| APOBEC3D | 0.994 | 5.34E-05 |
| HOXC8 | 0.997 | 9.64E-06 |
| ZNF624 | 0.99 | 0.000161 |
| IFNLR1 | 0.99 | 0.000139 |
| ZNF711 | 0.977 | 0.000816 |
| DOCK8 | 0.986 | 0.000287 |
| ANK3 | -0.999 | 1.98E-06 |
| CDKN1A | -0.992 | 9.29E-05 |
| TRIM68 | 0.999 | 1.85E-06 |
| FAR2 | 0.997 | 1.29E-05 |
| TNFRSF11B | -0.974 | 0.000971 |
| CLDN23 | 0.999 | 2.43E-06 |
| RIBC2 | -0.989 | 0.000188 |
| TSPAN31 | -0.998 | 6.31E-06 |
| HBQ1 | 0.997 | 9.63E-06 |
| ARSG | -0.995 | 3.76E-05 |
| SH2D5 | 0.999 | 2.01E-06 |
| GPR17 | -0.988 | 0.000217 |
| SOX9 | -0.985 | 0.000345 |
| SLC5A12 | -0.99 | 0.000157 |
| PRRT4 | 0.991 | 0.000128 |
| CCNI2 | -0.994 | 5.19E-05 |
| ENHO | 0.999 | 3.27E-06 |
| HORMAD1 | -0.998 | 8.89E-06 |
| S1PR5 | 0.999 | 2.27E-06 |
| PRKCDBP | -0.99 | 0.000143 |
| CLDN6 | 0.995 | 3.36E-05 |
| KANK2 | -0.997 | 1.11E-05 |
| RIMS3 | 0.996 | 2.67E-05 |
| CCDC152 | -0.98 | 0.00062 |
| VCAN | 0.975 | 0.000966 |
| VAV3 | -0.985 | 0.000315 |
| SYT13 | -0.997 | 1.16E-05 |
| UBASH3B | 0.998 | 5.31E-06 |
| CLYBL | -0.997 | 1.62E-05 |
| CHRNA3 | 0.998 | 6.42E-06 |
| FAM174B | 0.999 | 8.11E-07 |
| MYO10 | -0.998 | 4.78E-06 |
| MATN3 | -0.984 | 0.000405 |
| TERT | 0.993 | 7.88E-05 |
| RTN2 | 0.998 | 6.59E-06 |
| TACR1 | -0.986 | 0.000296 |
| LGALS9B | -0.992 | 0.000103 |
| 44077 | 0.993 | 6.70E-05 |
| SLC43A2 | 0.993 | 7.58E-05 |
| MTMR11 | 0.999 | 5.54E-07 |
| CBX7 | 0.999 | 1.30E-06 |
| PSTPIP2 | -0.987 | 0.000264 |
| PTN | -0.993 | 6.33E-05 |
| ZNF182 | -0.99 | 0.000139 |
| SDHA | -0.995 | 3.30E-05 |
| TMX4 | -0.998 | 3.86E-06 |
| ZNF391 | 0.994 | 5.21E-05 |
| SYDE2 | 0.992 | 0.000104 |
| P2RX5 | -0.987 | 0.000235 |
| RP11-162P23.2 | -0.989 | 0.000188 |
| SEMA3F | -0.986 | 0.000302 |
| KREMEN2 | 1 | 1.93E-07 |
| MPPED2 | -0.987 | 0.000268 |
| SLC6A16 | 0.994 | 5.97E-05 |
| NYAP1 | 0.989 | 0.000171 |
| MLLT3 | -0.998 | 7.34E-06 |
| ALDH1A2 | -0.993 | 7.22E-05 |
| ITGBL1 | -0.997 | 1.49E-05 |
| DNAJC6 | 0.984 | 0.000378 |
| ZNF577 | 0.995 | 4.26E-05 |
| VIPR2 | -0.993 | 7.20E-05 |
| EPB41L4A | -0.998 | 9.10E-06 |
| LRRIQ1 | -0.975 | 0.000943 |
| DOCK9 | -0.99 | 0.000155 |
| NBPF6 | -0.989 | 0.000183 |
| CPNE5 | 0.992 | 8.95E-05 |
| C1QTNF6 | -0.978 | 0.000728 |
| MEIOB | 0.995 | 3.65E-05 |
| HLA-C | 0.999 | 3.77E-07 |
| TSNAX-DISC1 | 0.989 | 0.00018 |
| CERS4 | 0.999 | 2.03E-06 |
| ING2 | 0.997 | 1.22E-05 |
| SPTBN4 | 1 | 2.29E-07 |
| NEURL1 | -0.992 | 9.72E-05 |
| TMUB1 | 0.997 | 1.30E-05 |
| EID3 | 0.995 | 3.80E-05 |
| DNAH2 | 0.975 | 0.000954 |
| IL11 | -0.996 | 2.30E-05 |
| TNFRSF19 | 0.992 | 0.000106 |
| ZNF347 | 0.994 | 5.40E-05 |
| SKAP1 | 0.986 | 0.000288 |
| DBP | 1 | 2.14E-07 |
| GAL | -0.995 | 3.99E-05 |
| WLS | -0.996 | 2.57E-05 |
| RNF32 | 0.997 | 1.06E-05 |
| RNF43 | -0.997 | 1.59E-05 |
| SLC19A3 | -0.994 | 5.53E-05 |
| CCNE2 | -0.985 | 0.000358 |
| RP11-886H22.1 | -0.982 | 0.000501 |
| PPM1H | -0.993 | 7.78E-05 |
| TEPP | -0.974 | 0.000977 |
| SYP | 0.998 | 4.56E-06 |
| ZNF649 | 0.981 | 0.000564 |
| LHB | 0.998 | 5.84E-06 |
| ZC2HC1C | 0.997 | 1.35E-05 |
| CP | 0.983 | 0.000454 |
| ZIC5 | -0.998 | 6.49E-06 |
| LRIG3 | -0.987 | 0.000238 |
| CH507-42P11.8 | -0.994 | 5.28E-05 |
| C6orf165 | 0.977 | 0.000775 |
| MB | -0.999 | 1.06E-06 |
| CRB3 | 0.984 | 0.000388 |
| AP3B2 | 0.99 | 0.00015 |
| YPEL4 | -0.999 | 2.24E-06 |
| RSPH3 | 0.994 | 4.60E-05 |
| ZNF701 | 0.979 | 0.000656 |
| HMX1 | 0.996 | 2.67E-05 |
| FOXP1 | -0.996 | 1.93E-05 |
| NYAP2 | -0.975 | 0.000939 |
| USP50 | 0.998 | 6.37E-06 |
| SMIM10 | -0.997 | 1.54E-05 |
| B4GALT1 | -0.996 | 1.85E-05 |
| RGS3 | 1 | 1.15E-07 |
| CPZ | -0.995 | 3.78E-05 |
| VSIG10L | 1 | 3.31E-07 |
| TBC1D2 | -0.994 | 5.22E-05 |
| CAMK1 | 0.998 | 7.72E-06 |
| TNFAIP6 | -0.978 | 0.000735 |
| MPZL3 | -0.983 | 0.000445 |
| GFY | 0.995 | 4.23E-05 |
| RP11-426L16.10 | 0.995 | 3.50E-05 |
| MR1 | 0.999 | 2.44E-06 |
| TPD52L1 | -0.999 | 5.56E-07 |
| ALDH2 | -0.998 | 8.84E-06 |
| TNFAIP8L1 | 0.994 | 5.06E-05 |
| APOBEC3B | 0.998 | 6.65E-06 |
| FGD1 | 0.999 | 6.35E-07 |
| ZNF492 | 1 | 2.77E-07 |
| SLC16A13 | 0.995 | 4.38E-05 |
| KBTBD11 | 0.996 | 2.82E-05 |
| PTPRN | 0.987 | 0.00027 |
| RGMB | -0.996 | 1.91E-05 |
| RCCD1 | -0.996 | 2.54E-05 |
| ESPNL | -0.99 | 0.000162 |
| TESK1 | 0.999 | 6.17E-07 |
| C1S | -0.992 | 0.000103 |
| NEO1 | 0.998 | 7.16E-06 |
| TMEM184A | -0.995 | 3.04E-05 |
| DEGS2 | 0.978 | 0.000714 |
| HSD17B1 | 0.999 | 6.79E-07 |
| NOX5 | -0.983 | 0.000432 |
| KRT83 | -0.987 | 0.00024 |
| MAGIX | 0.997 | 1.56E-05 |
| RPRM | -0.989 | 0.000171 |
| HS2ST1 | 0.983 | 0.00044 |
| RNF212 | -0.995 | 3.31E-05 |
| PIDD1 | 0.993 | 7.97E-05 |
| N4BP2L1 | 0.995 | 4.50E-05 |
| PCED1B | -0.995 | 3.64E-05 |
| ANKRD10 | -0.998 | 7.72E-06 |
| KRT81 | -0.996 | 2.94E-05 |
| PTPRM | -0.994 | 4.71E-05 |
| ZNF154 | -0.997 | 1.13E-05 |
| COMMD3-BMI1 | 0.981 | 0.000532 |
| RIMS1 | -0.998 | 8.36E-06 |
| ATRNL1 | 0.984 | 0.000359 |
| ANO2 | -0.98 | 0.000593 |
| ALDH1A3 | 0.986 | 0.000313 |
| KRT16 | -0.993 | 6.48E-05 |
| ZNF544 | -0.996 | 2.56E-05 |
| AKNA | 0.999 | 5.09E-07 |
| SRCIN1 | 0.997 | 1.66E-05 |
| PRDM11 | -0.993 | 6.66E-05 |
| TMTC1 | -0.998 | 3.53E-06 |
| EFNB2 | -0.988 | 0.000216 |
| PDLIM3 | -0.983 | 0.000409 |
| CDC42EP5 | 0.999 | 5.27E-07 |
| OCLN | 0.992 | 0.000106 |
| RGMA | 0.998 | 9.27E-06 |
| MAP2 | 0.996 | 1.96E-05 |
| ADGRG1 | -0.997 | 1.83E-05 |
| MAGEE1 | 0.977 | 0.000767 |
| IRS1 | -0.996 | 2.85E-05 |
| COL6A5 | -0.994 | 4.95E-05 |
| SUSD2 | -0.999 | 2.53E-06 |
| PDZD4 | 0.999 | 1.55E-06 |
| CLDN9 | 0.983 | 0.000434 |
| DMBT1 | -0.988 | 0.000225 |
| KRT18 | -0.992 | 9.12E-05 |
| KCNJ16 | 0.984 | 0.000392 |
| IL6R | 0.999 | 3.18E-06 |
| PTPN6 | 0.998 | 6.49E-06 |
| LIN28B | 0.999 | 3.33E-06 |
| KLF13 | -0.995 | 4.04E-05 |
| HES4 | 0.998 | 6.02E-06 |
| S100A1 | 0.984 | 0.000385 |
| PCDHA1 | 0.986 | 0.000293 |
| SCARB1 | -0.985 | 0.000353 |
| VANGL2 | 0.992 | 9.41E-05 |
| AXL | -0.997 | 1.52E-05 |
| MEI1 | -0.984 | 0.00037 |
| MORC4 | -0.997 | 1.12E-05 |
| ZBTB18 | 0.981 | 0.000513 |
| PLEKHA4 | 0.999 | 1.81E-06 |
| AGR2 | 0.986 | 0.000288 |
| C16orf62 | 0.997 | 9.98E-06 |
| SLC16A2 | 0.999 | 7.30E-07 |
| ELFN1 | 0.995 | 3.06E-05 |
| CALCRL | 0.985 | 0.000329 |
| C19orf81 | 0.998 | 8.98E-06 |
| SCUBE1 | -0.992 | 8.93E-05 |
| ATP2C2 | -0.987 | 0.000272 |
| EFCAB6 | 0.985 | 0.000316 |
| CDKN2B | -0.999 | 2.44E-06 |
| AK7 | 0.998 | 4.52E-06 |
| REC8 | 0.982 | 0.000468 |
| RP11-540D14.8 | 0.999 | 2.07E-06 |
| ACTR3C | -0.986 | 0.000276 |
| CD109 | -0.988 | 0.000209 |
| B3GNT5 | 0.991 | 0.00012 |
| PRKAA2 | -0.98 | 0.000589 |
| FAM155A | -0.983 | 0.000425 |
| TMEM92 | -0.974 | 0.000987 |
| CXCL11 | 0.995 | 3.27E-05 |
| ARAP3 | -0.996 | 2.17E-05 |
| ADCY1 | 0.997 | 1.03E-05 |
| FXYD3 | -0.976 | 0.000872 |
| KLRK1 | -0.997 | 1.06E-05 |
| SRGN | -0.991 | 0.000115 |
| TMEM200C | -0.998 | 4.28E-06 |
| ERRFI1 | 0.993 | 7.67E-05 |
| CDH2 | -0.995 | 3.26E-05 |
| SLC25A18 | 1 | 1.51E-07 |
| TOX | -0.99 | 0.000143 |
| SLC25A35 | 0.996 | 1.88E-05 |
| PDX1 | 0.996 | 2.76E-05 |
| CALHM3 | -0.99 | 0.000155 |
| ACOT1 | 0.998 | 8.30E-06 |
| HOMER2 | 1 | 1.03E-07 |
| THEGL | 0.976 | 0.000826 |
| INF2 | -0.989 | 0.000172 |
| GRIN2D | -0.994 | 5.42E-05 |
| RUNDC3A | 0.983 | 0.00042 |
| DLK2 | 0.998 | 6.09E-06 |
| ISL1 | 0.997 | 1.30E-05 |
| SRSF12 | 0.995 | 3.13E-05 |
| LY6K | -0.995 | 3.15E-05 |
| ZNF790 | 0.997 | 1.82E-05 |
| TRAPPC11 | 0.984 | 0.000364 |
| TGFB1I1 | -0.99 | 0.000148 |
| SOCS2 | 0.992 | 9.44E-05 |
| FANK1 | 0.976 | 0.000892 |
| PRDM16 | 0.994 | 4.89E-05 |
| DPYSL5 | 0.999 | 1.96E-06 |
| ADGRE2 | -0.999 | 2.27E-06 |
| KLF2 | 0.997 | 1.56E-05 |
| KIF1A | 0.999 | 9.90E-07 |
| CCDC68 | -0.988 | 0.00022 |
| INSL3 | 0.989 | 0.000197 |
| DEFB126 | 0.99 | 0.00014 |
| IL17RD | 0.984 | 0.000392 |
| HMHA1 | -0.987 | 0.000236 |
| SBK1 | 0.995 | 3.33E-05 |
| TLL1 | -0.987 | 0.000257 |
| FAM83A | -0.992 | 9.98E-05 |
| TBX3 | -0.991 | 0.00012 |
| SEMA3B | -0.992 | 9.59E-05 |
| GRK5 | -0.998 | 8.23E-06 |
| TTC21A | 0.991 | 0.000123 |
| STC1 | -0.996 | 2.72E-05 |
| CNN3 | 0.995 | 3.80E-05 |
| NKD2 | -0.991 | 0.000126 |
| BAMBI | -0.998 | 8.60E-06 |
| CCDC148 | 0.986 | 0.000297 |
| PMEPA1 | -0.998 | 9.18E-06 |
| MYO1G | -0.979 | 0.000675 |
| PQLC3 | 0.99 | 0.000159 |
| SLC25A27 | -0.986 | 0.000277 |
| SDSL | 0.997 | 1.13E-05 |
| STAT5A | -0.997 | 1.37E-05 |
| SIRPA | 0.998 | 7.26E-06 |
| SERTAD4 | -0.984 | 0.000375 |
| TTC6 | 0.975 | 0.000946 |
| C20orf96 | 1 | 4.44E-08 |
| RPS6KL1 | 0.998 | 4.38E-06 |
| GPR84 | 0.991 | 0.000132 |
| ZNF559-ZNF177 | -0.987 | 0.000241 |
| CACNA1H | 0.997 | 1.47E-05 |
| HLA-DRB1 | 0.975 | 0.000962 |
| ARPC4-TTLL3 | 0.998 | 4.70E-06 |
| CCDC96 | 0.991 | 0.00012 |
| FAM50B | -0.992 | 0.0001 |
| GCH1 | 0.993 | 8.31E-05 |
| SLC43A3 | -0.994 | 5.39E-05 |
| PCDHGB1 | -0.988 | 0.000214 |
| CERKL | -0.984 | 0.0004 |
| C10orf35 | 0.999 | 1.78E-06 |
| HBG2 | -0.991 | 0.000122 |
| RASGRP1 | 0.981 | 0.000561 |
| TMEM159 | 0.997 | 1.60E-05 |
| JAK2 | 0.992 | 9.00E-05 |
| SRGAP1 | -0.997 | 1.14E-05 |
| FIGN | 0.974 | 0.000997 |
| ZNF10 | 0.996 | 2.04E-05 |
| VWA1 | 1 | 8.05E-08 |
| EPHA6 | -0.987 | 0.000267 |
| ABCA6 | 0.998 | 5.41E-06 |
| PPAP2C | -0.984 | 0.000379 |
| IL18 | -0.998 | 4.09E-06 |
| ANKS1B | 0.986 | 0.000279 |
| ZNF20 | 0.999 | 5.75E-07 |
| FAM46C | 0.979 | 0.000683 |
| COL23A1 | 0.997 | 1.50E-05 |
| MYEF2 | 0.998 | 6.38E-06 |
| PCLO | -0.984 | 0.000395 |
| ZNF703 | -0.989 | 0.000178 |
| MYOM2 | 1 | 1.08E-07 |
| SUCO | 0.994 | 5.20E-05 |
| COL26A1 | 0.997 | 1.70E-05 |
| DDIT4 | -0.998 | 4.82E-06 |
| ADAM11 | 0.995 | 3.61E-05 |
| DNAJA4 | -0.995 | 3.25E-05 |
| MB21D1 | -0.992 | 9.57E-05 |
| NKIRAS1 | 0.99 | 0.00016 |
| RIBC1 | 0.991 | 0.000115 |
| SAA1 | -0.997 | 1.54E-05 |
| TMPRSS5 | -0.983 | 0.00042 |
| TUBB8P12 | 1 | 7.17E-08 |
| PKDCC | 0.999 | 5.45E-07 |
| CPT1C | 0.999 | 6.94E-07 |
| HS6ST3 | -0.982 | 0.000499 |
| BNIP3 | 0.994 | 4.95E-05 |
| LRRC3 | 0.989 | 0.000191 |
| VGF | 0.994 | 6.12E-05 |
| ANXA8L1 | -0.997 | 1.19E-05 |
| PLSCR4 | -0.992 | 9.88E-05 |
| COBL | -0.997 | 1.24E-05 |
| TJP3 | 0.998 | 3.93E-06 |
| TOR4A | -0.994 | 4.89E-05 |
| MAGEA3 | -0.999 | 2.97E-06 |
| ADARB2 | -0.997 | 1.02E-05 |
| AKT3 | 0.977 | 0.000765 |
| MFSD4 | 0.995 | 3.78E-05 |
| CDA | -0.996 | 2.02E-05 |
| NRIP1 | -0.981 | 0.000541 |
| ADGRB2 | 1 | 2.06E-07 |
| AGAP2 | 0.994 | 5.99E-05 |
| FOXQ1 | -0.991 | 0.000112 |
| SOX17 | -0.997 | 1.47E-05 |
| FAXC | 0.991 | 0.000127 |
| DCBLD2 | -0.988 | 0.000229 |
| PARD6G | 0.989 | 0.00018 |
| ACAD8 | -0.997 | 1.72E-05 |
| PODXL | -0.991 | 0.000132 |
| PIGZ | 0.983 | 0.000424 |
| MLK4 | -0.987 | 0.000249 |
| FAM196B | -0.984 | 0.000396 |
| KANK1 | 0.998 | 8.48E-06 |
| ZNF160 | 0.996 | 2.17E-05 |
| BEST3 | -0.975 | 0.000908 |
| ELOVL2 | 0.997 | 1.60E-05 |
| SSPO | 0.996 | 2.61E-05 |
| ENOX1 | -0.998 | 6.18E-06 |
| ZNF695 | 0.992 | 8.88E-05 |
| TSNAXIP1 | 0.996 | 2.57E-05 |
| OLFM3 | 0.982 | 0.000496 |
| IFI27L2 | 0.997 | 1.03E-05 |
| PLCD3 | -0.991 | 0.000118 |
| TBX2 | 1 | 3.66E-08 |
| MAGEA6 | -0.996 | 2.84E-05 |
| ZNF442 | 0.998 | 8.51E-06 |
| CECR2 | 0.999 | 1.03E-06 |
| JMJD8 | -0.986 | 0.0003 |
| PBDC1 | 0.995 | 3.15E-05 |
| VWA5A | -0.998 | 5.45E-06 |
| STX16-NPEPL1 | -0.996 | 2.64E-05 |
| IFFO1 | 0.999 | 6.81E-07 |
| PRAM1 | 0.991 | 0.000134 |
| ZBED2 | -0.982 | 0.000479 |
| INHBE | -0.996 | 1.92E-05 |
| COL4A3 | -0.975 | 0.000925 |
| SLC30A3 | 0.992 | 9.97E-05 |
| ADAP2 | 0.984 | 0.000383 |
| TMEM140 | 0.994 | 5.56E-05 |
| GPER1 | 1 | 2.41E-07 |
| NEGR1 | -0.984 | 0.000368 |
| PAIP2B | 0.997 | 1.01E-05 |
| CYP46A1 | 0.988 | 0.000221 |
| ABCG4 | 0.998 | 5.32E-06 |
| FRAS1 | -0.986 | 0.000284 |
| AHNAK2 | -0.999 | 3.27E-06 |
| TFAP4 | -0.994 | 5.43E-05 |
| TNS3 | -0.998 | 6.35E-06 |
| ALPL | -0.993 | 6.69E-05 |
| CYS1 | -0.983 | 0.000413 |
| RUNX2 | -0.99 | 0.000136 |
| NTF4 | 0.998 | 7.24E-06 |
| PRSS35 | 0.996 | 2.01E-05 |
| MFSD12 | -0.989 | 0.000169 |
| SYT5 | 0.992 | 9.64E-05 |
| MARK1 | -0.998 | 6.35E-06 |
| IGFBP2 | -0.995 | 4.51E-05 |
| TENM2 | -0.99 | 0.000148 |
| HOXB2 | 0.994 | 5.33E-05 |
| PTK7 | 0.999 | 2.99E-06 |
| CACNA1B | 0.999 | 1.18E-06 |
| MORN3 | 0.992 | 0.0001 |
| IFI44L | -0.992 | 0.000105 |
| GJB1 | 1 | 0 |
| ACCS | -0.986 | 0.000276 |
| GPR89A | 0.997 | 9.64E-06 |
| L3MBTL1 | 0.998 | 5.45E-06 |
| CAMSAP3 | 0.999 | 7.37E-07 |
| DNAJB5 | 0.999 | 8.02E-07 |
| GDF1 | 0.997 | 1.51E-05 |
| LIMD2 | 0.999 | 2.79E-06 |
| FAM195B | 0.999 | 1.36E-06 |
| CYLC1 | 0.997 | 1.41E-05 |
| NUDT16 | 1 | 1.51E-07 |
| FRY | -0.995 | 3.28E-05 |
| STAT3 | -0.996 | 2.16E-05 |
| TAPBPL | 0.989 | 0.000192 |
| NFATC4 | -0.998 | 7.30E-06 |
| CLTCL1 | -0.99 | 0.000151 |
| C3 | -0.993 | 7.27E-05 |
| RP11-1021N1.1 | -0.986 | 0.000313 |
| FBN2 | -0.994 | 6.16E-05 |
| IGF2BP2 | 0.996 | 2.46E-05 |
| STARD4 | 0.984 | 0.000379 |
| GEM | 0.985 | 0.000337 |
| FAM214B | 0.997 | 1.06E-05 |
| MALL | -0.997 | 1.69E-05 |
| ADHFE1 | 0.989 | 0.000167 |
| TLL2 | 0.976 | 0.000857 |
| MMP1 | 0.998 | 4.78E-06 |
| RP11-87C12.2 | 0.979 | 0.000666 |
| MCOLN3 | 0.991 | 0.000124 |
| SHBG | 0.979 | 0.000655 |
| FAM117A | 0.996 | 2.61E-05 |
| TTC39B | 0.995 | 3.88E-05 |
| SULF2 | -0.996 | 2.03E-05 |
| CHN2 | -0.993 | 6.60E-05 |
| C19orf45 | 0.985 | 0.000319 |
| LAPTM5 | -0.987 | 0.000262 |
| KNDC1 | 0.998 | 8.14E-06 |
| L3MBTL3 | -0.985 | 0.000342 |
| MYC | -0.994 | 5.47E-05 |
| FAM102B | -0.995 | 3.63E-05 |
| ATP6V0E2 | 0.999 | 1.42E-06 |
| UCHL1 | 0.997 | 1.50E-05 |
| SLC9A2 | 0.979 | 0.000628 |
| DSEL | -0.995 | 3.87E-05 |
| ZNF717 | 0.992 | 0.000103 |
| LRRC75A | 0.996 | 2.69E-05 |
| HOXA3 | -0.997 | 1.73E-05 |
| DSP | -0.998 | 6.11E-06 |
| CEMIP | -0.975 | 0.000931 |
| CD44 | -0.998 | 3.60E-06 |
| CNRIP1 | 1 | 3.27E-08 |
| ZNF618 | 0.998 | 3.84E-06 |
| MSLN | -0.992 | 0.000107 |
| CD9 | -0.98 | 0.000582 |
| ACTN2 | 0.996 | 1.85E-05 |
| CTB-55O6.8 | 0.996 | 2.22E-05 |
| IL15 | -0.998 | 8.31E-06 |
| DEF6 | 0.997 | 1.25E-05 |
| TTC9 | 0.999 | 1.67E-06 |
| HLA-B | 0.996 | 1.96E-05 |
| NAPRT | -0.983 | 0.000436 |
| CALD1 | -0.983 | 0.000436 |
| SLC35D2 | 0.998 | 3.63E-06 |
| C11orf63 | 0.975 | 0.000959 |
| ZCCHC12 | 0.984 | 0.000393 |
| C12orf54 | -0.998 | 7.96E-06 |
| STK33 | -0.996 | 2.13E-05 |
| METRN | 0.998 | 4.52E-06 |
| NKX2-8 | 0.999 | 2.92E-06 |
| CABLES1 | -0.998 | 8.64E-06 |
| ULK2 | -0.994 | 6.00E-05 |
| SFXN3 | -0.998 | 3.71E-06 |
| NRCAM | -0.998 | 3.64E-06 |
| MT1E | -0.982 | 0.00049 |
| COL4A1 | -0.997 | 1.32E-05 |
| PCYT1B | 0.995 | 4.06E-05 |
| RABL2A | 0.992 | 8.55E-05 |
| ELF3 | -0.997 | 1.29E-05 |
| INSL4 | -0.986 | 0.000292 |
| USP43 | 0.996 | 2.85E-05 |
| SFMBT2 | -0.988 | 0.000227 |
| ARHGAP33 | 0.997 | 1.36E-05 |
| LRP4 | 0.996 | 2.04E-05 |
| BDH1 | -0.995 | 3.22E-05 |
| MYEOV | -0.996 | 2.83E-05 |
| ACSS1 | 0.983 | 0.00041 |
| CCR10 | 0.994 | 5.21E-05 |
| BAIAP3 | 0.979 | 0.000682 |
| TCEAL3 | -0.997 | 1.68E-05 |
| PBX3 | 0.991 | 0.000114 |
| ZNF781 | 0.983 | 0.000445 |
| GNG3 | 0.977 | 0.000768 |
| MNAT1 | 0.996 | 2.45E-05 |
| RAB6B | 0.989 | 0.000166 |
| ZNF563 | 0.992 | 9.06E-05 |
| NINJ2 | -0.99 | 0.00014 |
| FBXO2 | 0.999 | 1.55E-06 |
| CCNJL | -0.998 | 6.46E-06 |
| ZNF420 | 0.991 | 0.000131 |
| PLA2G3 | 0.997 | 1.03E-05 |
| GABRQ | -0.994 | 5.36E-05 |
| GNGT1 | -0.981 | 0.000512 |
| ZNF365 | -0.998 | 3.68E-06 |
| NRP1 | -0.997 | 1.37E-05 |
| TMCC3 | 0.999 | 3.07E-06 |
| COL6A2 | 0.997 | 1.05E-05 |
| C15orf59 | 0.998 | 5.85E-06 |
| XXbac-BPG116M5.17 | -0.993 | 7.37E-05 |
| JUNB | -0.994 | 6.18E-05 |
| TMEM74 | -0.993 | 8.23E-05 |
| TNIK | 0.993 | 8.13E-05 |
| ZNF771 | 0.999 | 1.19E-06 |
| IL11RA | 0.999 | 6.23E-07 |
| FMO5 | 0.986 | 0.000284 |
| SH2D3A | -0.991 | 0.000121 |
| CEND1 | 0.992 | 9.62E-05 |
| ATP4A | 0.998 | 7.51E-06 |
| BBS5 | 0.999 | 2.11E-06 |
| DUSP10 | -0.991 | 0.000119 |
| WDR66 | 0.987 | 0.000248 |
| CAV2 | -0.991 | 0.000112 |
| TRIM6-TRIM34 | 0.983 | 0.000416 |
| TMEM200B | 0.995 | 4.40E-05 |
| CCDC114 | 0.99 | 0.000164 |
| MAGEA2 | -0.993 | 6.62E-05 |
| DES | -0.993 | 6.91E-05 |
| FJX1 | -0.996 | 2.98E-05 |
| CLIC3 | 0.995 | 3.41E-05 |
| SKAP2 | -0.997 | 1.09E-05 |
| DNAH10 | 0.992 | 8.65E-05 |
| FABP5 | -0.998 | 5.12E-06 |
| HS6ST2 | -0.978 | 0.000692 |
| RAB3B | 1 | 5.92E-08 |
| SHC1 | 1 | 1.44E-07 |
| P2RX5-TAX1BP3 | -0.995 | 3.29E-05 |
| SLC12A6 | 0.995 | 3.69E-05 |
| NTSR1 | -0.986 | 0.000297 |
| IQCJ-SCHIP1 | -0.998 | 8.21E-06 |
| ZFP69B | 0.994 | 5.96E-05 |
| MEGF11 | 0.975 | 0.000926 |
| KCNN4 | -0.988 | 0.000216 |
| PAQR9 | 0.993 | 6.49E-05 |
| ZNF738 | -0.994 | 5.69E-05 |
| SDC1 | 0.999 | 1.26E-06 |
| SPRY1 | 0.994 | 4.55E-05 |
| ACTN3 | 0.999 | 2.88E-06 |
| TCF7L1 | 0.988 | 0.000232 |
| ARHGEF4 | -0.993 | 7.90E-05 |
| XKR8 | -0.988 | 0.000204 |
| CASZ1 | 1 | 1.52E-07 |
| SULF1 | -0.985 | 0.000344 |
| TYRP1 | 0.998 | 7.07E-06 |
| SH3GL2 | -0.996 | 2.93E-05 |
| SIK2 | -0.997 | 1.06E-05 |
| LGALS12 | -0.996 | 2.71E-05 |
| ENOSF1 | -0.992 | 0.000101 |
| PAPPA | -0.989 | 0.000167 |
| CYP2S1 | -0.993 | 8.40E-05 |
| TBC1D30 | -0.993 | 6.73E-05 |
| EPAS1 | -0.998 | 4.56E-06 |
| PACSIN1 | 0.999 | 5.50E-07 |
| SIPA1L2 | -0.997 | 1.48E-05 |
| LOXL1 | -0.989 | 0.000181 |
| RGAG4 | 0.996 | 1.93E-05 |
| SHF | 0.998 | 5.97E-06 |
| SMARCD3 | 1 | 2.80E-07 |
| TMEM220 | 0.997 | 1.49E-05 |
| DIAPH3 | -0.993 | 6.92E-05 |
| DPYSL4 | 1 | 1.12E-07 |
| HIST1H1B | -0.975 | 0.000964 |
| DNMBP | -0.996 | 2.03E-05 |
| CTSC | -0.997 | 1.63E-05 |
| VILL | 0.988 | 0.000213 |
| EVPL | -0.998 | 7.02E-06 |
| PIK3R5 | 0.984 | 0.000396 |
| PKP3 | -0.992 | 0.000101 |
| ITPR1 | -0.986 | 0.000279 |
| ZFP90 | 0.999 | 3.22E-06 |
| RTKN | 0.999 | 1.01E-06 |
| LIPH | -0.989 | 0.000188 |
| DKKL1 | 0.989 | 0.000167 |
| IL1A | -0.992 | 0.000104 |
| TH | -0.974 | 0.000993 |
| ATP1A3 | 0.995 | 3.23E-05 |
| RBM24 | 0.997 | 1.45E-05 |
| MMP10 | 0.997 | 1.22E-05 |
| TSPAN1 | -0.992 | 8.93E-05 |
| SIDT2 | 0.999 | 1.53E-06 |
| COL4A6 | -0.998 | 9.33E-06 |
| PRX | 0.991 | 0.000126 |
| ISL2 | 0.998 | 7.47E-06 |
| GBP3 | 0.984 | 0.00039 |
| ZNF382 | 0.983 | 0.000416 |
| BMP6 | -0.993 | 7.38E-05 |
| RND2 | 1 | 3.59E-07 |
| KDM6A | 0.999 | 1.05E-06 |
| SQRDL | 0.999 | 6.95E-07 |
| ADAMTS2 | 0.99 | 0.000157 |
| PDE9A | -0.98 | 0.000606 |
| MATK | -0.987 | 0.000247 |
| WWC1 | -0.998 | 9.36E-06 |
| WNT6 | -0.987 | 0.000246 |
| FAM26E | 0.986 | 0.000278 |
| PC | -0.995 | 4.39E-05 |
| ARHGEF33 | -0.989 | 0.000177 |
| TNNT1 | 0.999 | 3.06E-06 |
| KRT10 | -0.999 | 2.14E-06 |
| SFN | -0.997 | 1.40E-05 |
| HMGCLL1 | -0.989 | 0.000189 |
| HIST1H2BG | -0.986 | 0.00029 |
| ITGB2 | -0.998 | 4.64E-06 |
| SHROOM2 | 0.995 | 4.48E-05 |
| LHX4 | -0.975 | 0.000894 |
| IL17REL | -0.999 | 3.08E-06 |
| BTBD3 | -0.989 | 0.000183 |
| STS | -0.998 | 3.65E-06 |
| DPY19L2 | 0.983 | 0.000412 |
| CCDC8 | 0.999 | 7.95E-07 |
| HIST1H3G | -0.992 | 9.01E-05 |
| PIANP | 0.994 | 5.51E-05 |
| DIO2 | -0.997 | 1.42E-05 |
| TMEM133 | -0.998 | 6.06E-06 |
| KSR1 | -0.996 | 1.90E-05 |
| ZNF532 | -0.997 | 1.24E-05 |
| LAMP1 | -0.996 | 2.58E-05 |
| ZP3 | -0.987 | 0.000249 |
| KCNK6 | 0.994 | 5.66E-05 |
| ITGAV | 0.98 | 0.000588 |
| COL16A1 | -0.997 | 1.02E-05 |
| CAPN6 | 0.976 | 0.000882 |
| NYNRIN | -0.994 | 5.29E-05 |
| GPR85 | 0.996 | 2.67E-05 |
| RPL37 | -0.996 | 2.66E-05 |
| TDRP | 0.997 | 1.04E-05 |
| B3GALT4 | 0.995 | 4.01E-05 |
| EFNA1 | -0.993 | 7.75E-05 |
| PTGES3L-AARSD1 | 0.996 | 2.83E-05 |
| CCR1 | 0.993 | 7.11E-05 |
| METTL7B | 0.991 | 0.000113 |
| HAPLN3 | 0.993 | 8.03E-05 |
| VMO1 | 1 | 2.44E-08 |
| C10orf2 | -0.998 | 4.01E-06 |
| IRAK3 | -0.992 | 8.59E-05 |
| RBMS3 | 0.997 | 1.06E-05 |
| HIST2H2AB | -0.985 | 0.000329 |
| SLC12A3 | -0.998 | 8.69E-06 |
| ABCC3 | -0.998 | 6.83E-06 |
| MAP7 | -0.981 | 0.000556 |
| SLC4A4 | -0.981 | 0.000521 |
| ADRBK2 | 0.998 | 9.14E-06 |
| RGPD8 | -0.989 | 0.000185 |
| PSMB9 | 0.999 | 4.53E-07 |
| PAQR5 | -0.998 | 7.24E-06 |
| PNMA6A | 0.995 | 3.99E-05 |
| DOCK3 | 0.997 | 1.23E-05 |
| FDXR | 0.999 | 1.21E-06 |
| ANO3 | 0.992 | 0.000106 |
| KIAA0319 | 0.994 | 4.77E-05 |
| SYN2 | 0.998 | 9.06E-06 |
| SLC22A15 | -0.994 | 6.19E-05 |
| KLF9 | -0.995 | 3.95E-05 |
| CFAP221 | 0.994 | 5.92E-05 |
| NKX2-2 | 0.983 | 0.000437 |
| HIST2H4B | -0.989 | 0.000195 |
| NHSL2 | 0.996 | 1.86E-05 |
| TFF1 | -0.994 | 5.85E-05 |
| MT2A | -0.981 | 0.000538 |
| GPR156 | -0.986 | 0.0003 |
| ZNF675 | 0.991 | 0.000109 |
| CTC-454I21.3 | 0.977 | 0.000773 |
| TSNARE1 | 0.98 | 0.000602 |
| ZNF860 | -0.998 | 4.69E-06 |
| ZNF681 | 0.979 | 0.000687 |
| CPPED1 | 0.995 | 3.18E-05 |
| GAREML | 0.997 | 1.56E-05 |
| SH2D2A | -0.994 | 5.79E-05 |
| S100A16 | -0.99 | 0.000165 |
| RIN2 | -0.996 | 2.38E-05 |
| SCARA5 | -0.998 | 7.47E-06 |
| ITK | -0.998 | 5.86E-06 |
| DEPTOR | -0.996 | 3.02E-05 |
| CKB | -0.99 | 0.00014 |
| SPATA2L | 0.996 | 2.00E-05 |
| NPTXR | -0.993 | 7.33E-05 |
| KLKB1 | 0.989 | 0.000169 |
| SRGAP3 | 0.996 | 2.61E-05 |
| PLAG1 | -0.98 | 0.000584 |
| CACNA1A | -0.981 | 0.000543 |
| KLRG2 | 0.997 | 1.16E-05 |
| AKAP3 | 0.985 | 0.000348 |
| AVPR2 | -0.995 | 3.94E-05 |
| ZNF503 | -0.998 | 7.73E-06 |
| SYNGR3 | 0.998 | 7.02E-06 |
| IFI44 | -0.997 | 1.43E-05 |
| MAP1LC3A | 0.988 | 0.000217 |
| ACTG2 | 0.998 | 3.59E-06 |
| APLP1 | 0.999 | 3.18E-06 |
| NOXA1 | 0.994 | 5.22E-05 |
| ARMCX3 | -0.99 | 0.000137 |
| FASTKD3 | -0.998 | 4.55E-06 |
| ZMYND12 | 0.994 | 5.50E-05 |
| CPEB1 | 0.992 | 0.000102 |
| MOCOS | -0.998 | 6.52E-06 |
| LHX2 | 0.991 | 0.000121 |
| PRR36 | 0.997 | 1.35E-05 |
| USP46 | 0.983 | 0.000406 |
| TNFRSF11A | -0.993 | 8.19E-05 |
| DNM1 | -0.99 | 0.000158 |
| WWC2 | 0.995 | 4.20E-05 |
| IL20RA | 1 | 8.20E-08 |
| TNFSF15 | -0.992 | 0.0001 |
| TUBA4A | -0.996 | 2.83E-05 |
| MYPN | -0.99 | 0.000155 |
| APOL6 | 0.996 | 2.69E-05 |
| CD72 | 0.98 | 0.000587 |
| POU3F2 | -0.984 | 0.000379 |
| CCIN | 0.996 | 1.97E-05 |
| ST3GAL4 | -0.991 | 0.000118 |
| MLKL | -0.998 | 7.53E-06 |
| HCN4 | 0.984 | 0.000393 |
| ABCG1 | -0.995 | 4.00E-05 |
| HRH1 | -0.997 | 1.66E-05 |
| MET | -0.997 | 1.13E-05 |
| HIST1H4A | -0.987 | 0.000271 |
| SH3GLB1 | 0.994 | 5.93E-05 |
| PCSK1 | -0.99 | 0.000155 |
| FAM81A | -0.993 | 7.38E-05 |
| ITPKA | 1 | 1.17E-07 |
| EFR3B | 0.997 | 1.16E-05 |
| SPATA6L | 0.975 | 0.000961 |
| METRNL | -0.993 | 7.61E-05 |
| FHOD3 | -0.998 | 3.90E-06 |
| LGALS9 | -0.982 | 0.000489 |
| WFDC1 | -0.995 | 3.80E-05 |
| SVIP | -0.993 | 7.63E-05 |
| SMIM10L2A | 0.999 | 1.79E-06 |
| ZNF606 | 0.997 | 1.19E-05 |
| RNF217 | -0.984 | 0.000382 |
| CFH | 0.998 | 4.14E-06 |
| ARHGAP25 | -0.996 | 2.07E-05 |
| TANC2 | -0.996 | 2.31E-05 |
| C9orf64 | -0.998 | 3.60E-06 |
| FEZ1 | 0.989 | 0.000172 |
| SORBS2 | -0.997 | 1.36E-05 |
| ADGRL2 | -0.999 | 7.59E-07 |
| EHD3 | 1 | 7.83E-08 |
| PPP2R2C | 0.996 | 2.99E-05 |
| ZNF280A | 0.992 | 9.93E-05 |
| MMP14 | 0.983 | 0.000456 |
| C1orf116 | -0.979 | 0.00067 |
| RAPGEFL1 | 0.998 | 6.00E-06 |
| C16orf86 | 0.998 | 3.68E-06 |
| ZNF600 | 0.999 | 4.05E-07 |
| ZNF470 | 0.983 | 0.000452 |
| ZNF816 | 0.992 | 0.000104 |
| SH3BGR | 0.995 | 3.71E-05 |
| RND1 | 0.999 | 2.00E-06 |
| IRX5 | -0.997 | 1.69E-05 |
| IPO5 | -0.996 | 1.85E-05 |
| CPM | -0.992 | 0.000105 |
| SLC37A1 | 0.998 | 4.16E-06 |
| KRT7 | -0.994 | 5.66E-05 |
| ZNF585A | 0.975 | 0.000963 |
| ZNF827 | 0.989 | 0.000169 |
| GP1BB | 0.998 | 4.08E-06 |
| KIAA1407 | 0.996 | 2.56E-05 |
| KCNJ2 | 0.984 | 0.000374 |
| KLHL35 | -0.98 | 0.000573 |
| CATSPER1 | -0.99 | 0.00016 |
| GATA5 | -0.991 | 0.000128 |
| HTATIP2 | -0.998 | 3.63E-06 |
| FAM107B | -0.997 | 1.21E-05 |
| ACOT2 | 0.995 | 4.16E-05 |
| LMOD1 | 0.999 | 5.40E-07 |
| MSX1 | -0.989 | 0.000179 |
| NKX2-1 | 0.996 | 2.48E-05 |
| JAM3 | 0.999 | 6.39E-07 |
| ID4 | 0.997 | 1.55E-05 |
| SIMC1 | 0.997 | 1.73E-05 |
| SYTL1 | 1 | 1.22E-07 |
| PDE10A | -0.989 | 0.000168 |
| TUB | 1 | 2.27E-07 |
| GCNT4 | 0.991 | 0.00011 |
| SLC35E2 | -0.991 | 0.000113 |
| RBPMS | -0.994 | 5.65E-05 |
| ZNF71 | 0.998 | 7.84E-06 |
| EFEMP2 | 0.997 | 1.75E-05 |
| PRKAG2 | 0.991 | 0.000123 |
| STARD6 | 0.99 | 0.000159 |
| IFIH1 | 0.993 | 7.62E-05 |
| PERP | -0.992 | 9.17E-05 |
| ZNF571 | 0.998 | 3.48E-06 |
| ABTB2 | -0.993 | 6.90E-05 |
| GBP1 | 0.999 | 1.52E-06 |
| TFRC | -0.996 | 2.22E-05 |
| LAMA4 | -0.992 | 9.90E-05 |
| MN1 | -0.989 | 0.00019 |
| ETS1 | -0.986 | 0.000278 |
| ARHGAP42 | -0.982 | 0.000487 |
| AGA | -0.996 | 2.05E-05 |
| SLC1A7 | -0.996 | 1.89E-05 |
| MYL9 | 0.999 | 5.46E-07 |
| F12 | 0.997 | 1.13E-05 |
| RBAK-RBAKDN | 0.991 | 0.000119 |
| GABBR1 | 0.997 | 1.50E-05 |
| CMTM3 | 0.998 | 3.85E-06 |
| PARP12 | -0.996 | 2.82E-05 |
| GATSL3 | 0.993 | 7.05E-05 |
| SNX21 | 0.999 | 6.62E-07 |
| C1QL4 | 0.997 | 9.82E-06 |
| FAM26D | 0.999 | 6.82E-07 |
| PDZD2 | -0.987 | 0.000263 |
| SLC1A1 | -0.999 | 2.06E-06 |
| IFT74 | -0.993 | 7.70E-05 |
| AKAP12 | -0.989 | 0.000183 |
| PI3 | -0.99 | 0.000156 |
| TMEM191B | 0.996 | 1.98E-05 |
| ZNF569 | 0.974 | 0.000979 |
| MAP3K15 | 0.99 | 0.000156 |
| COMP | 0.998 | 8.18E-06 |
| KDELC1 | -0.997 | 9.60E-06 |
| MLF1 | 0.994 | 5.33E-05 |
| DLX6 | 1 | 3.09E-07 |
| PLXNB3 | -0.988 | 0.00022 |
| TSPAN18 | -0.993 | 7.46E-05 |
| TRIM6 | -0.998 | 4.86E-06 |
| SYTL5 | -0.988 | 0.000202 |
| RMDN2 | 0.987 | 0.000238 |
| CXCL16 | 0.998 | 5.75E-06 |
| ZNF268 | 0.99 | 0.000155 |
| CENPU | 0.996 | 2.19E-05 |
| RBM43 | 0.99 | 0.000161 |
| CTSS | -0.982 | 0.000457 |
| C1orf204 | -0.979 | 0.000628 |
| DAB1 | -0.99 | 0.00015 |
| GCKR | 0.993 | 7.07E-05 |
| VAMP5 | 0.992 | 8.87E-05 |
| L1CAM | -0.997 | 1.39E-05 |
| FBXO4 | -0.998 | 4.51E-06 |
| LMCD1 | 0.999 | 1.04E-06 |
| SUSD1 | -0.988 | 0.000201 |
| NR3C1 | -0.994 | 5.53E-05 |
| PER3 | 0.993 | 6.42E-05 |
| LBH | -0.993 | 8.28E-05 |
| P4HTM | -0.987 | 0.000255 |
| BMP7 | 0.998 | 3.71E-06 |
| SYT3 | 0.982 | 0.000461 |
| TDRD9 | -0.996 | 2.39E-05 |
| ETV5 | 0.998 | 7.35E-06 |
| EFNB3 | 0.998 | 4.92E-06 |
| DHDH | 0.987 | 0.000268 |
| HSH2D | -0.988 | 0.000203 |
| FAXDC2 | 0.999 | 1.61E-06 |
| TUBB8 | 0.988 | 0.0002 |
| B4GALNT3 | 0.995 | 3.57E-05 |
| LAMC2 | -0.993 | 7.28E-05 |
| WNT10A | -0.98 | 0.000606 |
| T | -0.998 | 7.66E-06 |
| IL6 | -0.998 | 6.08E-06 |
| DCLK2 | 0.994 | 6.16E-05 |
| LMO7 | -0.99 | 0.000143 |
| HRC | 0.995 | 4.44E-05 |
| PARP9 | 0.98 | 0.000607 |
| NPR2 | 0.992 | 8.44E-05 |
| PADI3 | -0.989 | 0.000177 |
| GRAMD2 | -0.985 | 0.000323 |
| EDN1 | -0.997 | 1.68E-05 |
| ZNF223 | -0.994 | 6.14E-05 |
| SLC9A7 | 0.994 | 5.50E-05 |
| CHCHD7 | -0.998 | 7.11E-06 |
| MARVELD2 | -0.991 | 0.000126 |
| PCDH17 | -0.988 | 0.000208 |
| ELMO1 | 0.984 | 0.000392 |
| PLEKHO1 | 0.999 | 1.83E-06 |
| ZNF467 | 0.999 | 8.42E-07 |
| CABP4 | -0.983 | 0.000422 |
| GALNT12 | 0.989 | 0.000173 |
| RP11-195F19.29 | 0.987 | 0.000261 |
| PODXL2 | -0.996 | 2.60E-05 |
| RPS6KA6 | 0.986 | 0.000285 |
| OSR2 | 0.997 | 9.90E-06 |
| GLRB | -0.996 | 2.47E-05 |
| BIRC7 | -0.991 | 0.000111 |
| ZNF311 | -0.993 | 6.54E-05 |
| KLK8 | 0.999 | 2.84E-06 |
| ZNF879 | 0.983 | 0.00044 |
| DRAM1 | -0.999 | 2.87E-06 |
| ADGRL3 | 0.974 | 0.000998 |
| EYA1 | -0.989 | 0.000176 |
| F2RL1 | -0.996 | 2.69E-05 |
| EMILIN2 | -0.986 | 0.00029 |
| ENO2 | 0.999 | 1.64E-06 |
| DAPK1 | 0.987 | 0.000258 |
| TESC | -0.998 | 6.77E-06 |
| NAP1L2 | 0.974 | 0.000978 |
| FLT4 | 0.998 | 4.70E-06 |
| LRRC61 | -0.985 | 0.000317 |
| GSTO2 | -0.992 | 9.48E-05 |
| ZDHHC6 | -0.998 | 6.35E-06 |
| PLLP | 0.998 | 7.35E-06 |
| ICA1 | 0.993 | 8.34E-05 |
| HRASLS2 | -0.993 | 8.24E-05 |
| PRKCG | 0.996 | 2.93E-05 |
| VSTM4 | 0.995 | 3.42E-05 |
| EML1 | 0.994 | 5.02E-05 |
| HAPLN1 | 0.996 | 2.19E-05 |
| SOX8 | 0.993 | 6.57E-05 |
| AMY2B | -0.981 | 0.000553 |
| ZNF141 | 0.992 | 9.08E-05 |
| ING3 | -0.986 | 0.000311 |
| DAB2 | -0.998 | 6.32E-06 |
| DCN | -0.998 | 5.93E-06 |
| LDLRAD4 | -0.983 | 0.000441 |
| ZNF512 | -0.998 | 6.72E-06 |
| NMNAT2 | 0.989 | 0.00017 |
| NUDT18 | 0.998 | 4.28E-06 |
| RILP | 0.999 | 7.99E-07 |
| HTR6 | 0.982 | 0.000486 |
| WIPF3 | 0.993 | 7.40E-05 |
| ZNF720 | 0.999 | 2.80E-06 |
| TTC39A | 0.997 | 1.43E-05 |
| KCNJ18 | -0.998 | 7.81E-06 |
| WNK3 | 0.981 | 0.000552 |
| SLC6A15 | -0.993 | 7.93E-05 |
| EMB | 0.996 | 1.87E-05 |
| UQCC1 | -0.993 | 6.82E-05 |
| RYR2 | -0.996 | 2.89E-05 |
| GPRIN3 | -0.995 | 3.99E-05 |
| PANX2 | 0.988 | 0.000232 |
| BDNF | -0.997 | 1.19E-05 |
| ITGB4 | -0.992 | 8.61E-05 |
| GSG1 | 0.996 | 2.74E-05 |
| ANGPTL2 | 0.999 | 5.30E-07 |
| ABLIM3 | -0.997 | 1.38E-05 |
| CRACR2B | 1 | 3.36E-07 |
| VAV1 | -0.987 | 0.00027 |
| CENPV | 1 | 1.38E-08 |
| MEST | -0.998 | 3.72E-06 |
| DCTD | 0.998 | 7.08E-06 |
| EPPK1 | -0.997 | 1.04E-05 |
| SLC9A3R2 | -0.996 | 2.91E-05 |
| NEBL | 0.984 | 0.000366 |
| HOGA1 | -0.993 | 7.84E-05 |
| PLAUR | -0.993 | 7.99E-05 |
| CBFA2T3 | 0.987 | 0.000265 |
| ATP8B2 | 0.998 | 8.69E-06 |
| KIAA1211L | 0.997 | 1.32E-05 |
| MCAM | -0.997 | 1.15E-05 |
| TRPM2 | -0.986 | 0.000308 |
| EFNA3 | 0.997 | 1.03E-05 |
| GALC | 0.994 | 5.06E-05 |
| PDE4B | -0.997 | 1.05E-05 |
| FCGBP | 0.981 | 0.000542 |
| SEMA4D | 0.997 | 1.44E-05 |
| CRIP1 | -0.995 | 3.94E-05 |
| SP6 | 0.993 | 6.40E-05 |
| ODF3B | -0.993 | 7.96E-05 |
| SAMD4A | 0.992 | 9.31E-05 |
| ZNF354C | 0.997 | 1.70E-05 |
| HOXB6 | 0.999 | 1.52E-06 |
| VPS37D | 0.997 | 1.38E-05 |
| CFAP43 | 0.98 | 0.000567 |
| C1orf110 | -0.993 | 7.23E-05 |
| APOBEC3F | 0.998 | 5.84E-06 |
| RRAGD | 0.996 | 2.78E-05 |
| CDK6 | -0.994 | 5.07E-05 |
| IGFBP4 | -0.997 | 1.22E-05 |
| C11orf86 | -0.995 | 3.35E-05 |
| C1orf106 | 0.992 | 8.62E-05 |
| SIX4 | 0.996 | 1.87E-05 |
| KLK13 | 0.992 | 8.78E-05 |
| SP8 | -0.981 | 0.000514 |
| ITGA2 | -0.998 | 8.40E-06 |
| ERAP1 | 0.997 | 1.53E-05 |
| ZSCAN16 | -0.997 | 1.33E-05 |
| DDR2 | -0.993 | 7.76E-05 |
| ANKRD45 | 0.997 | 1.36E-05 |
| ZMYND10 | 0.993 | 8.41E-05 |
| TMCC2 | 0.996 | 2.32E-05 |
| ZNF383 | 0.994 | 5.38E-05 |
| HLA-A | -0.997 | 1.19E-05 |
| PDE1A | -0.998 | 4.26E-06 |
| SPECC1 | -0.998 | 6.32E-06 |
| INPP1 | -0.997 | 1.12E-05 |
| FGFBP1 | -0.993 | 6.76E-05 |
| ZNF423 | 0.988 | 0.000216 |
| TRPM3 | -0.98 | 0.000572 |
| PCSK9 | -0.995 | 3.93E-05 |
| TLR5 | 0.994 | 6.14E-05 |
| TSHZ2 | -0.991 | 0.000112 |
| OCIAD2 | -0.995 | 3.42E-05 |
| PCOLCE | -0.991 | 0.000125 |
| ACKR3 | -0.987 | 0.000271 |
| NAA11 | -0.998 | 8.57E-06 |
| CCNB3 | 1 | 3.10E-07 |
| SLC39A4 | 0.998 | 5.41E-06 |
| DMRT2 | 0.999 | 1.29E-06 |
| KCNJ11 | 0.999 | 1.34E-06 |
| S100A10 | -0.995 | 3.58E-05 |
| TMIE | 0.985 | 0.000345 |
| STAB1 | 0.983 | 0.000455 |
| TNC | -0.979 | 0.000663 |
| MYH14 | 0.998 | 9.20E-06 |
| TEX13B | -0.977 | 0.000767 |
| HIST1H2AL | -0.98 | 0.000593 |
| TSKU | -0.983 | 0.000443 |
| ZFHX2 | 1 | 2.23E-07 |
| FCMR | -0.995 | 3.15E-05 |
| TBC1D4 | -0.996 | 2.77E-05 |
| CFAP74 | -0.974 | 0.000975 |
| RASA3 | -0.998 | 5.40E-06 |
| MNX1 | 0.999 | 4.24E-07 |
| APOE | 0.999 | 1.71E-06 |
| PPP1R3B | 0.992 | 0.000106 |
| ARTN | -0.989 | 0.000172 |
| SH3TC1 | -0.989 | 0.000185 |
| MITF | -0.998 | 4.05E-06 |
| SYPL2 | 1 | 1.22E-07 |
| FBXO36 | 0.981 | 0.000564 |
| GAGE2A | -0.996 | 2.26E-05 |
| TRIM9 | 0.989 | 0.000178 |
| OLFM1 | -0.997 | 1.43E-05 |
| LLGL2 | 0.999 | 1.18E-06 |
| PRCD | -0.978 | 0.000706 |
| GJB7 | -0.996 | 2.06E-05 |
| FAM109B | -0.995 | 4.51E-05 |
| VASN | -0.997 | 9.49E-06 |
| SLC29A4 | 0.994 | 5.69E-05 |
| TMEM145 | 0.982 | 0.000463 |
| PCDHA11 | 0.991 | 0.00013 |
| GPR137B | 0.998 | 7.47E-06 |
| CDKL1 | 0.994 | 5.51E-05 |
| MEGF6 | -0.992 | 8.98E-05 |
| TUSC1 | -0.997 | 1.30E-05 |
| ADGRB1 | 0.996 | 2.88E-05 |
| ACBD7 | 0.989 | 0.000194 |
| RET | 0.991 | 0.000134 |
| ANKRD1 | 0.998 | 8.06E-06 |
| MANSC1 | 0.996 | 2.90E-05 |
| RNASE4 | 0.993 | 7.73E-05 |
| FBXO16 | 0.993 | 7.18E-05 |
| MGST2 | -0.989 | 0.000165 |
| THEM4 | -0.997 | 1.44E-05 |
| WDR31 | 0.996 | 2.60E-05 |
| CXXC5 | -0.998 | 5.77E-06 |
| MAGI2 | 0.986 | 0.0003 |
| SLC4A3 | 0.993 | 8.24E-05 |
| RTBDN | 0.997 | 1.06E-05 |
| TSC22D1 | -0.996 | 2.16E-05 |
| VWA5B2 | 0.993 | 6.86E-05 |
| GNAO1 | -0.981 | 0.000552 |
| RAB42 | -0.997 | 1.18E-05 |
| ZNF98 | 0.976 | 0.000826 |
| MAP1A | 0.997 | 1.07E-05 |
| P4HA3 | -0.997 | 9.94E-06 |
| GLIPR2 | 0.996 | 2.39E-05 |
| C19orf38 | 0.998 | 6.43E-06 |
| HSPA1A | -0.992 | 0.000108 |
| CDKN2A | -0.994 | 5.35E-05 |
| FAM78A | 0.998 | 5.16E-06 |
| MOCS1 | 0.996 | 2.90E-05 |
| STOX2 | 0.998 | 3.87E-06 |
| RSPH14 | 0.98 | 0.000575 |
| TLR4 | -0.981 | 0.00056 |
| AVPI1 | -0.993 | 6.41E-05 |
| SPINK4 | -0.997 | 1.67E-05 |
| TSHZ3 | 0.999 | 3.93E-07 |
| PXDN | -0.998 | 5.40E-06 |
| DNER | -0.995 | 3.04E-05 |
| TTLL3 | 1 | 1.01E-07 |
| RGS9 | 0.999 | 1.41E-06 |
| SLC16A9 | 0.989 | 0.00018 |
| DDIT4L | -0.996 | 2.31E-05 |
| PRSS16 | 0.994 | 5.75E-05 |
| PLXNC1 | 0.99 | 0.000158 |
| PADI2 | 0.992 | 0.0001 |
| MGAT4A | 0.997 | 1.74E-05 |
| HES1 | -0.98 | 0.000569 |
| NOS3 | 1 | 1.09E-07 |
| MYL7 | 0.991 | 0.000115 |
| ITGA7 | 0.996 | 2.19E-05 |
| EXOSC5 | -0.993 | 7.42E-05 |
| SYCE2 | 0.994 | 5.31E-05 |
| MCF2L | -0.996 | 2.71E-05 |
| DNAJC12 | -0.998 | 7.61E-06 |
| SLC25A4 | 0.994 | 5.07E-05 |
| PTGS2 | -0.982 | 0.000504 |
| HOXA10 | -0.997 | 1.69E-05 |
| TMBIM4 | -0.998 | 7.40E-06 |
| GPC5 | -0.993 | 7.17E-05 |
| TRABD2B | -0.996 | 1.93E-05 |
| SH2D3C | 0.993 | 7.08E-05 |
| MPZL2 | -0.99 | 0.000164 |
| MBLAC1 | 0.996 | 1.96E-05 |
| CSDC2 | -0.982 | 0.000508 |
| GCNT1 | -0.991 | 0.000112 |
| ERI1 | 0.989 | 0.000176 |
| TRPV3 | 0.979 | 0.000661 |
| C2orf81 | 0.996 | 2.01E-05 |
| LPL | -0.997 | 1.42E-05 |
| SLC16A3 | -0.985 | 0.000347 |
| GRM8 | -0.983 | 0.000443 |
| SLC17A7 | 0.997 | 1.61E-05 |
| C8orf22 | -0.998 | 7.46E-06 |
| SYS1-DBNDD2 | 0.999 | 8.52E-07 |
| LGSN | -0.986 | 0.000299 |
| ALPI | -0.994 | 5.62E-05 |
| ADAMTS5 | -0.986 | 0.000287 |
| IL20RB | -0.997 | 1.65E-05 |
| ID2 | 0.994 | 5.41E-05 |
| CYP26A1 | 0.99 | 0.000153 |
| HIST1H4I | -0.986 | 0.000309 |
| F2R | 0.995 | 4.23E-05 |
| BATF2 | 0.999 | 1.67E-06 |
| C6orf223 | -0.993 | 8.30E-05 |
| LTBR | -0.993 | 6.43E-05 |
| ARHGAP23 | -0.995 | 3.90E-05 |
| MOK | 0.999 | 3.78E-07 |
| CLU | -0.996 | 2.91E-05 |
| CORO1A | 0.999 | 2.35E-06 |
| PRRG4 | 0.996 | 2.81E-05 |
| EPB41L5 | 0.991 | 0.000124 |
| TMSB15B | 0.995 | 3.56E-05 |
| PTP4A3 | 0.999 | 3.02E-06 |
| COL15A1 | -0.998 | 7.47E-06 |
| IGF1R | -0.998 | 4.73E-06 |
| CPED1 | -0.989 | 0.000172 |
| NTRK1 | -0.991 | 0.00013 |
| ZBTB20 | -0.98 | 0.000582 |
| CFL2 | 0.984 | 0.000395 |
| OPRL1 | 0.993 | 6.58E-05 |
| PAX9 | 0.996 | 2.77E-05 |
| HLA-DPA1 | 0.991 | 0.00013 |
| CAP2 | 0.988 | 0.00021 |
| CRISPLD2 | -0.997 | 1.54E-05 |
| CUBN | 0.997 | 1.16E-05 |
| RBPMS2 | 0.995 | 3.06E-05 |
| SMOC1 | -0.996 | 2.74E-05 |
| MST1R | -0.978 | 0.000697 |
| DIRAS1 | 0.999 | 2.33E-06 |
| APOL1 | 0.996 | 2.00E-05 |
| SLC43A1 | 1 | 4.36E-08 |
| NUP62CL | -0.983 | 0.000438 |
| RP11-872D17.8 | -0.992 | 9.11E-05 |
| SLC6A17 | 0.99 | 0.000161 |
| ZNF783 | -0.997 | 1.09E-05 |
| ADM2 | -0.996 | 2.96E-05 |
| ZNF616 | 0.991 | 0.000122 |
| RIMKLB | -0.995 | 4.13E-05 |
| HDX | 0.989 | 0.000189 |
| PHF21B | 0.998 | 4.18E-06 |
| CASP3 | 0.999 | 2.89E-06 |
| ZNF491 | 0.995 | 3.46E-05 |
| FAM111A | 0.992 | 9.78E-05 |
| ZNF599 | 0.998 | 7.02E-06 |
| ZNF821 | 0.991 | 0.000124 |
| LURAP1 | 0.999 | 1.49E-06 |
| EPM2AIP1 | -0.994 | 4.66E-05 |
| COL7A1 | -0.998 | 4.82E-06 |
| ZNF813 | 0.989 | 0.000194 |
| DIO3 | -0.992 | 8.59E-05 |
| CACNG7 | 0.982 | 0.00049 |
| ARHGAP18 | -0.984 | 0.000361 |
| SELENBP1 | -0.994 | 6.19E-05 |
| KIF3C | 0.998 | 9.09E-06 |
| WDR63 | 0.986 | 0.00028 |
| PCDHGB6 | 0.981 | 0.00053 |
| CERS1 | 0.999 | 5.23E-07 |
| PRKD1 | 0.999 | 2.43E-06 |
| RBKS | 0.998 | 4.13E-06 |
| AQP11 | 0.996 | 2.90E-05 |
| GIPC3 | -0.979 | 0.000688 |
| MEF2C | -0.984 | 0.000377 |
| CDON | -0.988 | 0.000212 |
| ECHDC3 | -0.981 | 0.000555 |
| DPYSL3 | -0.996 | 2.58E-05 |
| MAB21L2 | 0.999 | 1.08E-06 |
| CAV1 | -0.992 | 9.42E-05 |
| ZNF483 | 0.997 | 1.27E-05 |
| CT83 | -0.995 | 3.47E-05 |
| KIAA0825 | -0.998 | 6.78E-06 |
| CD55 | -0.998 | 5.73E-06 |
| STK32B | -0.976 | 0.000824 |
| KCNJ4 | 0.995 | 3.89E-05 |
| BEX2 | 0.997 | 9.80E-06 |
| SYNPO | -0.996 | 2.83E-05 |
| RHPN1 | 0.994 | 5.79E-05 |
| CPA4 | -0.989 | 0.000176 |
| UGT3A2 | 0.996 | 2.03E-05 |
| KCNK15 | -0.986 | 0.00028 |
| PPP1R3D | 0.979 | 0.000686 |
| SAMD9 | -0.996 | 1.89E-05 |
| P2RY1 | 0.999 | 1.85E-06 |
| FAAH2 | -0.994 | 5.88E-05 |
| IQCA1 | -0.996 | 2.22E-05 |
| TRABD2A | -0.992 | 8.73E-05 |
| STOX1 | 0.999 | 1.42E-06 |
| NOVA2 | 0.993 | 6.41E-05 |
| GJC2 | -0.982 | 0.000477 |
| ENG | -0.988 | 0.000199 |
| DLGAP3 | 0.99 | 0.000161 |
| JAG1 | -0.994 | 5.86E-05 |
| FOXC1 | -0.999 | 4.68E-07 |
| ALDH3B1 | -0.997 | 1.34E-05 |
| PGPEP1L | 0.989 | 0.000173 |
| TLX3 | 0.996 | 2.68E-05 |
| PRKCH | 0.989 | 0.000191 |
| THSD4 | -0.992 | 9.40E-05 |
| OLR1 | -0.993 | 7.33E-05 |
| TMEM179 | 0.993 | 7.32E-05 |
| HTRA3 | -0.99 | 0.000164 |
| TMEM249 | 0.981 | 0.000533 |
| BEST1 | -0.981 | 0.000516 |
| NCKAP5 | -0.986 | 0.00028 |
| SLC15A3 | 0.997 | 1.28E-05 |
| MVB12B | 0.999 | 2.59E-06 |
| RHOV | -0.997 | 1.57E-05 |
| EOMES | 0.998 | 7.61E-06 |
| MED12L | 0.985 | 0.000319 |
| TMEM171 | 0.998 | 7.99E-06 |
| PDCD4 | -0.99 | 0.000161 |
| TCEAL8 | -0.991 | 0.000134 |
| MAP3K5 | -0.996 | 2.58E-05 |
| SH3RF3 | -0.992 | 0.000102 |
| IAH1 | -0.996 | 2.33E-05 |
| PARP10 | 0.993 | 7.21E-05 |
| MEIS3 | -0.993 | 7.05E-05 |
| ST6GALNAC1 | -0.988 | 0.000222 |
| IL1RAP | -1 | 1.86E-07 |
| SNAP25 | -0.998 | 7.09E-06 |
| PCDH10 | 0.994 | 5.72E-05 |
| CUL9 | -0.992 | 0.000102 |
| CNN1 | 1 | 1.74E-07 |
| PRSS21 | -0.99 | 0.000158 |
| HENMT1 | -0.997 | 1.30E-05 |
| TMEM221 | 0.996 | 2.87E-05 |
| C19orf57 | 0.989 | 0.000167 |
| WDR38 | 0.981 | 0.000518 |
| NFATC2 | -0.992 | 8.64E-05 |
| ZNF433 | 0.988 | 0.000211 |
| SPHK1 | 1 | 4.65E-08 |
| SERPING1 | 0.999 | 1.53E-06 |
| TOM1L2 | 0.999 | 2.95E-06 |
| FYN | -0.999 | 1.06E-06 |
| LPPR3 | 0.999 | 3.75E-07 |
| SAMD12 | -0.989 | 0.00017 |
| FCGRT | 0.999 | 1.94E-06 |
| RPL27 | -0.992 | 0.000101 |
| IL18R1 | 0.98 | 0.000619 |
| SRPX2 | -0.989 | 0.00019 |
| EPOR | 0.999 | 1.51E-06 |
| LINGO1 | 0.997 | 9.60E-06 |
| HR | -0.996 | 2.48E-05 |
| TGFBI | -0.995 | 3.72E-05 |
| IRX3 | -0.998 | 8.51E-06 |
| GTF2E2 | 0.999 | 9.18E-07 |
| ONECUT3 | -0.997 | 1.02E-05 |
| SLC22A4 | -0.996 | 1.93E-05 |
| GLT8D2 | -0.992 | 9.31E-05 |
| DDX26B | 0.995 | 4.24E-05 |
| MICAL2 | -0.991 | 0.000122 |
| F11R | 0.997 | 9.63E-06 |
| TRAF1 | 0.992 | 9.62E-05 |
| FAM184A | 0.976 | 0.000847 |
| KAZN | 0.994 | 4.98E-05 |
| C1QTNF2 | 0.988 | 0.000212 |
| PDK4 | -0.988 | 0.000201 |
| TNS4 | -0.995 | 4.46E-05 |
| AIFM2 | -0.997 | 1.29E-05 |
| CGA | -0.998 | 4.70E-06 |
| USP18 | 0.998 | 6.22E-06 |
| AXDND1 | 0.978 | 0.000713 |
| CLEC2B | -0.996 | 1.91E-05 |
| IFITM1 | -0.997 | 1.38E-05 |
| PLEKHG4 | -0.996 | 2.97E-05 |
| ISM1 | -0.998 | 3.46E-06 |
| NR4A2 | -0.986 | 0.000296 |
| SIGIRR | 0.999 | 1.10E-06 |
| KCNMB4 | -0.996 | 2.26E-05 |
| PTCH2 | 0.982 | 0.000492 |
| MMP11 | 0.998 | 5.67E-06 |
| TP53TG3D | 0.993 | 7.16E-05 |
| SNAP91 | 0.994 | 5.16E-05 |
| FAM129B | -0.995 | 4.23E-05 |
| ALPPL2 | -0.976 | 0.00083 |
| TRIML2 | -0.994 | 6.26E-05 |
| MRAP2 | 0.999 | 7.90E-07 |
| ERBB3 | 0.998 | 4.26E-06 |
| RASL10A | 0.999 | 3.16E-06 |
| NHS | -0.979 | 0.000688 |
| APOLD1 | -0.989 | 0.000183 |
| HIST1H3F | -0.995 | 4.41E-05 |
| ZNF28 | 0.979 | 0.000675 |
| TMEM158 | -0.986 | 0.000293 |
| CABP1 | 0.985 | 0.000343 |
| FUT4 | -0.998 | 8.33E-06 |
| KCNH2 | 0.999 | 7.83E-07 |
| HCST | 0.997 | 1.67E-05 |
| MUC15 | 0.987 | 0.000261 |
| GRIN3B | 0.996 | 2.89E-05 |
| KCNN1 | 0.995 | 3.41E-05 |
| DCLK1 | 0.997 | 1.50E-05 |
| SPINK5 | -0.994 | 5.47E-05 |
| HOXB3 | 0.989 | 0.000178 |
| NAV2 | -0.992 | 0.000103 |
| PAPD4 | 0.989 | 0.000174 |
| TMEM150C | 1 | 2.46E-07 |
| SMAD9 | 0.984 | 0.000377 |
| MCEMP1 | 0.988 | 0.000227 |
| GPR137C | 0.991 | 0.000116 |
| CMPK2 | 0.997 | 1.56E-05 |
| KLHDC9 | 0.999 | 4.08E-07 |
| LFNG | -0.988 | 0.000226 |
| MTCL1 | -0.998 | 4.49E-06 |
| RND3 | -0.997 | 1.34E-05 |
| KLF14 | 0.982 | 0.00046 |
| DUSP6 | 0.996 | 2.69E-05 |
| FGF11 | 1 | 8.58E-08 |
| NUDT17 | 0.995 | 3.22E-05 |
| CCDC80 | 0.997 | 1.15E-05 |
| PLA2G4A | -0.996 | 2.56E-05 |
| BLMH | -0.997 | 1.55E-05 |
| SDR16C5 | -0.998 | 7.29E-06 |
| ZNF785 | -0.993 | 6.84E-05 |
| NRTN | 0.986 | 0.000279 |
| NR4A1 | -0.993 | 8.03E-05 |
| MFGE8 | 0.998 | 7.77E-06 |
| FZD10 | -0.995 | 3.48E-05 |
| ESRP2 | -0.997 | 1.09E-05 |
| CELF5 | 0.996 | 2.69E-05 |
| FOXF1 | -0.997 | 1.17E-05 |
| NGEF | 0.999 | 2.71E-06 |
| ACSL5 | -0.977 | 0.000805 |
| DUSP23 | -0.994 | 5.18E-05 |
| LRRC32 | 0.993 | 7.10E-05 |
| HSPB1 | -0.99 | 0.000163 |
| ZNF721 | 0.997 | 1.53E-05 |
| HOXD9 | -0.999 | 2.74E-06 |
| CTSV | 0.999 | 5.10E-07 |
| SALL2 | 0.997 | 9.77E-06 |
| LAMA3 | -0.992 | 9.68E-05 |
| CHL1 | -0.983 | 0.000416 |
| PAPSS2 | -0.982 | 0.000487 |
| C7orf31 | 0.981 | 0.000517 |
| RORB | -0.987 | 0.000236 |
| COL4A4 | -0.997 | 1.08E-05 |
| ANKRD6 | 0.996 | 1.90E-05 |
| ANKEF1 | -0.993 | 8.37E-05 |
| TAF4B | -0.977 | 0.000778 |
| AMIGO2 | -0.994 | 4.62E-05 |
| C1QL1 | 0.997 | 1.24E-05 |
| WIPF1 | -0.998 | 4.47E-06 |
| ANKRD34A | 0.996 | 2.89E-05 |
| DKK1 | -0.986 | 0.00029 |
| LRFN4 | -0.994 | 4.53E-05 |
| ZNF625-ZNF20 | 0.998 | 4.96E-06 |
| COX6B2 | -0.994 | 5.90E-05 |
| SLPI | -0.997 | 1.74E-05 |
| VIM | 0.987 | 0.000262 |
| TMEM87B | 0.987 | 0.000234 |
| KIAA1107 | 0.977 | 0.000767 |
| KANK4 | -0.994 | 4.53E-05 |
| AC092835.2 | 0.979 | 0.000628 |
| PCDHB2 | 0.996 | 2.86E-05 |
| APOL3 | 0.996 | 1.97E-05 |
| GLS2 | 0.999 | 5.60E-07 |
| GRAMD3 | -0.986 | 0.000295 |
| TM4SF18 | 0.994 | 5.94E-05 |
| F2RL3 | -0.998 | 6.07E-06 |
| ZNF490 | -0.997 | 1.06E-05 |
| UBA7 | 0.993 | 7.69E-05 |
| DMC1 | 0.991 | 0.000131 |
| RASGRP2 | 0.996 | 1.97E-05 |
| CLGN | 0.983 | 0.000431 |
| CABYR | 0.998 | 9.27E-06 |
| GNG11 | -0.994 | 5.39E-05 |
| EPCAM | -0.98 | 0.000615 |
| GAS6 | -0.981 | 0.000537 |
| GRM2 | 0.996 | 2.25E-05 |
| CADM4 | 0.998 | 3.89E-06 |
| CARD14 | -0.989 | 0.00017 |
| GPR135 | 0.992 | 9.71E-05 |
| PSCA | -0.98 | 0.0006 |
| CHRDL2 | -0.998 | 6.82E-06 |
| CCDC64B | 0.99 | 0.000139 |
| DMD | -0.979 | 0.000653 |
| C2orf73 | 0.991 | 0.000111 |
| MAMSTR | 0.992 | 0.000102 |
| SERPINB9 | 0.997 | 1.32E-05 |
| SSTR1 | -0.997 | 9.90E-06 |
| RNF144A | 0.992 | 9.11E-05 |
| IRS2 | -0.986 | 0.000308 |
| IRX4 | 0.981 | 0.000542 |
| C19orf18 | 0.99 | 0.000153 |
| HAP1 | 0.999 | 2.43E-06 |
| CD40 | 0.976 | 0.000885 |
| TMPRSS3 | -0.996 | 2.25E-05 |
| MAFA | 1 | 3.31E-07 |
| PLEK2 | -0.997 | 1.07E-05 |
| CEP19 | 0.999 | 2.94E-06 |
| STMN3 | -0.994 | 4.67E-05 |
| EGF | 0.983 | 0.000422 |
| BCAR3 | -0.998 | 6.78E-06 |
| LENG9 | -0.994 | 5.36E-05 |
| BBS12 | 0.982 | 0.000508 |
| MRAS | 1 | 5.20E-08 |
| FAM166B | 0.985 | 0.000333 |
| CCDC184 | 0.998 | 4.53E-06 |
| LAMB3 | -0.994 | 5.26E-05 |
| OLFML2B | 0.999 | 1.83E-06 |
| WTIP | 0.997 | 1.53E-05 |
| CSAG1 | -0.997 | 1.82E-05 |
| RAB11FIP4 | 0.999 | 1.23E-06 |
| ZNF91 | 0.99 | 0.000159 |
| HMOX1 | 0.999 | 8.09E-07 |
| EMP1 | 0.997 | 1.20E-05 |
| SNPH | 0.995 | 3.26E-05 |
| FGFR3 | 1 | 3.49E-07 |
| OSCAR | 0.975 | 0.000949 |
| ERICH2 | 0.985 | 0.000335 |
| FOXA1 | 0.999 | 2.37E-06 |
| ZNF626 | 0.986 | 0.00029 |
| BCAN | 0.997 | 1.53E-05 |
| PLA2R1 | -0.991 | 0.00011 |
| FAM69B | 0.999 | 7.85E-07 |
| ARMC4 | -0.996 | 1.97E-05 |
| TSPAN33 | 0.999 | 1.75E-06 |
| ZNF85 | 0.999 | 4.13E-07 |
| COL9A3 | -0.997 | 1.31E-05 |
| MOB3B | -0.998 | 6.78E-06 |
| BCL6B | -0.99 | 0.00016 |
| MT1F | -0.997 | 1.03E-05 |
| SPATA6 | 0.994 | 6.29E-05 |
| CXCL3 | -0.987 | 0.000258 |
| ISYNA1 | 0.999 | 6.18E-07 |
| ARID3B | 0.997 | 1.08E-05 |
| TFCP2L1 | 0.997 | 1.54E-05 |
| ZNF700 | 0.999 | 2.99E-06 |
| CXCR4 | -0.998 | 5.70E-06 |
| SLC25A21 | 0.997 | 1.63E-05 |
| PAN2 | -0.992 | 9.41E-05 |
| MDK | 1 | 4.36E-08 |
| NMI | 0.998 | 5.27E-06 |
| EEPD1 | 0.997 | 1.77E-05 |
| PRR5L | -0.992 | 9.77E-05 |
| UBAC2 | -0.996 | 2.90E-05 |
| KANK3 | 0.975 | 0.000944 |
| PLAGL1 | -0.994 | 5.08E-05 |
| NUPR1 | -0.975 | 0.000938 |
| C16orf45 | -0.998 | 7.70E-06 |
| KIAA1024 | -0.987 | 0.000271 |
| FAM171B | 0.986 | 0.00031 |
| TNFAIP3 | -0.999 | 1.60E-06 |
| PPL | -0.997 | 1.32E-05 |
| ME3 | -0.992 | 8.68E-05 |
| GPRC5A | -0.996 | 2.20E-05 |
| BMP5 | -0.998 | 7.78E-06 |
| ZNF843 | 0.998 | 6.18E-06 |
| SLC12A7 | -0.991 | 0.000119 |
| CHST11 | 0.992 | 9.90E-05 |
| PMAIP1 | -0.99 | 0.000148 |
| NUAK1 | -0.998 | 4.67E-06 |
| TNRC6C | 0.989 | 0.000188 |
| ARSD | 1 | 2.31E-07 |
| COL4A2 | -0.996 | 1.88E-05 |
| RAB15 | 0.998 | 7.34E-06 |
| MGAT3 | 1 | 3.20E-07 |
| CYBA | -0.996 | 2.96E-05 |
| HCN2 | -0.981 | 0.000542 |
| UBE2Q2L | 0.999 | 8.15E-07 |
| DPYD | -0.99 | 0.000151 |
| SELL | -0.998 | 7.70E-06 |
| UFSP2 | 0.996 | 2.42E-05 |
| ROR2 | -0.996 | 2.50E-05 |
| TNFRSF10A | -0.997 | 1.42E-05 |
| NPHP3-ACAD11 | 0.986 | 0.000302 |
| C21orf33 | 0.996 | 1.92E-05 |
| NPEPL1 | -0.99 | 0.000138 |
| CXCL8 | -0.996 | 1.97E-05 |
| HSPB8 | -0.992 | 9.43E-05 |
| PCNXL2 | -0.998 | 5.44E-06 |
| UGT8 | -0.997 | 1.37E-05 |
| HERC3 | -0.995 | 3.51E-05 |
| ADGRD1 | -0.989 | 0.000169 |
| IL22RA1 | 0.994 | 6.11E-05 |
| CCDC171 | 0.978 | 0.0007 |
| LUZP2 | -0.98 | 0.000588 |
| SNTG1 | 0.983 | 0.000456 |
| NR1D1 | -0.992 | 8.63E-05 |
| MFAP5 | -0.987 | 0.000256 |
| ZBTB7C | -0.995 | 3.64E-05 |
| THAP8 | 0.993 | 7.16E-05 |
| IGSF1 | -0.987 | 0.000257 |
| BRINP3 | 1 | 2.25E-07 |
| FGD5 | -0.993 | 6.99E-05 |
| TBX19 | 0.987 | 0.000243 |
| RINL | -0.987 | 0.000246 |
| NNMT | -0.995 | 4.05E-05 |
| SEMA3C | 0.982 | 0.000478 |
| KIAA1644 | -0.986 | 0.00031 |
| PXMP4 | -0.996 | 2.22E-05 |
| CA9 | -0.985 | 0.000321 |
| CBR1 | -0.994 | 6.21E-05 |
| THBS3 | 0.998 | 3.62E-06 |
| TDRKH | 0.992 | 8.46E-05 |
| NPAS2 | -0.988 | 0.000199 |
| DENND3 | -0.994 | 5.70E-05 |
| TGM2 | -0.996 | 2.66E-05 |
| CCDC121 | 0.982 | 0.000502 |
| KCNH1 | -0.986 | 0.000279 |
| PELI2 | -0.996 | 2.00E-05 |
| FTH1 | -0.996 | 2.86E-05 |
| GJB3 | -0.982 | 0.000495 |
| KIF5C | 0.979 | 0.00065 |
| NIPAL2 | 0.983 | 0.000453 |
| SRPX | -0.981 | 0.00056 |
| APH1B | 0.999 | 1.47E-06 |
| MCTP2 | -0.998 | 3.58E-06 |
| KCNRG | 0.983 | 0.000424 |
| MFAP3L | 0.994 | 5.17E-05 |
| ZNF850 | 0.998 | 7.98E-06 |
| ATP10A | 0.997 | 1.02E-05 |
| CEP72 | -0.996 | 2.82E-05 |
| AR | -0.995 | 3.06E-05 |
| EFHD1 | 0.995 | 3.72E-05 |
| TYMP | -0.987 | 0.000236 |
| BASP1 | -0.984 | 0.000364 |
| PRSS23 | -0.997 | 1.07E-05 |
| ZNF836 | 0.988 | 0.000232 |
| ABCG2 | -0.987 | 0.000266 |
| TTLL1 | 0.989 | 0.000166 |
| ARSJ | -0.998 | 4.56E-06 |
| SLC9A4 | 0.99 | 0.000164 |
| GDA | -0.997 | 1.26E-05 |
| SYT7 | -0.996 | 2.02E-05 |
| USP16 | 0.999 | 1.94E-06 |
| PIM1 | -0.99 | 0.000141 |
| TNS1 | 0.997 | 9.57E-06 |
| PSMB8 | -0.997 | 1.55E-05 |
| BVES | 0.991 | 0.000117 |
| ZNF395 | 0.999 | 2.51E-06 |
| ARMC3 | 0.991 | 0.000117 |
| HGF | 0.996 | 2.24E-05 |
| ZNF461 | 0.994 | 4.71E-05 |
| PRRT2 | 0.994 | 5.33E-05 |
| ETNPPL | -0.975 | 0.000955 |
| RGS17 | -0.982 | 0.000497 |
| ACVR1C | 0.996 | 2.76E-05 |
| FKBP1B | 0.997 | 1.20E-05 |
| BMP2 | -0.997 | 1.04E-05 |
| TP53I11 | 0.997 | 1.25E-05 |
| ACOX3 | 0.999 | 1.27E-06 |
| SCARF2 | 0.999 | 4.89E-07 |
| TRIM59 | -0.993 | 6.76E-05 |
| C8orf4 | -0.995 | 4.10E-05 |
| NDRG1 | -0.994 | 5.23E-05 |
| C5orf63 | -0.985 | 0.000315 |
| TSPAN12 | -0.977 | 0.000797 |
| TRPC4 | -0.981 | 0.00052 |
| SIAE | -0.989 | 0.000168 |
| RAB31 | -0.998 | 4.34E-06 |
| SRD5A3 | 1 | 3.53E-07 |
| KIF26A | -0.991 | 0.000127 |
| DLX2 | 0.995 | 3.74E-05 |
| RHOBTB1 | -0.998 | 4.46E-06 |
| WBSCR17 | 0.998 | 7.66E-06 |
| PSD | 0.989 | 0.000188 |
| RHOD | -0.99 | 0.00016 |
| JAKMIP2 | -0.974 | 0.000984 |
| CSRP1 | -0.997 | 1.29E-05 |
| CTD-2535L24.2 | 0.995 | 3.42E-05 |
| ANKRD34B | 0.99 | 0.000143 |
| AC009133.22 | 0.99 | 0.000159 |
| SLC25A24 | -0.982 | 0.00047 |
| MAPK4 | -0.986 | 0.000284 |
| ADRA1B | -0.994 | 6.28E-05 |
| ISG20 | 1 | 7.63E-08 |
| KLRC3 | -0.998 | 8.39E-06 |
| RIMKLA | 0.994 | 5.92E-05 |
| C5 | 0.993 | 8.09E-05 |
| PLAC8 | -0.998 | 7.66E-06 |
| MTSS1 | 0.984 | 0.000401 |
| KRT15 | -0.983 | 0.000432 |
| TDRD7 | 0.998 | 6.70E-06 |
| DDN | -0.988 | 0.000209 |
| PTGER4 | -0.98 | 0.000615 |
| KLF4 | -0.99 | 0.000153 |
| CREG2 | -0.995 | 4.49E-05 |
| BOC | 0.997 | 1.06E-05 |
| EVA1C | -0.995 | 3.43E-05 |
| GPR162 | 0.999 | 2.77E-06 |
| HKR1 | 1 | 2.74E-08 |
| MMAA | 0.996 | 2.41E-05 |
| CCNA1 | -0.989 | 0.000173 |
| EXOC3 | -0.993 | 8.41E-05 |
| ADRA2C | 0.992 | 8.99E-05 |
| TCF15 | 0.995 | 3.98E-05 |
| KLC3 | 0.999 | 2.59E-06 |
| ELOVL3 | -0.976 | 0.000832 |
| PDLIM1 | -0.995 | 3.24E-05 |
| SYT11 | 0.995 | 3.69E-05 |
| TMEM130 | 0.996 | 2.48E-05 |
| DUSP1 | -0.994 | 4.62E-05 |
| CIART | 0.995 | 3.10E-05 |
| LIMS3 | 0.975 | 0.000948 |
| CCDC89 | 0.991 | 0.000123 |
| GABRE | -0.992 | 0.000107 |
| ZNF469 | -0.996 | 2.92E-05 |
| SLFN12 | -0.997 | 1.54E-05 |
| ARNT2 | -0.989 | 0.000184 |
| KIAA0040 | -0.993 | 8.16E-05 |
| UPK1A | 1 | 1.47E-07 |
| MB21D2 | -0.984 | 0.000366 |
| PLCB4 | -0.992 | 8.97E-05 |
| LRRC29 | 0.992 | 8.61E-05 |
| GPR146 | 0.998 | 8.86E-06 |
| RASGRF2 | -0.983 | 0.000417 |
| PTCH1 | 0.988 | 0.000232 |
| LPCAT2 | -0.992 | 9.99E-05 |
| TMEM52 | 0.99 | 0.000159 |
| RAET1L | -0.992 | 9.70E-05 |
| TNFAIP8L3 | 0.977 | 0.000796 |
| SEMA6B | 0.997 | 1.33E-05 |
| PTK6 | -0.99 | 0.000152 |
| MESP2 | 0.994 | 5.53E-05 |
| MMP17 | -0.987 | 0.000251 |
| NKAIN4 | -0.984 | 0.00036 |
| LAMA5 | -0.987 | 0.000252 |
| RTN4RL2 | -0.985 | 0.00035 |
| LRRK2 | 0.975 | 0.000932 |
| PLCB1 | -0.99 | 0.000155 |
| APBA2 | 0.999 | 2.06E-06 |
| CCRL2 | -0.986 | 0.000295 |
| NDN | 0.998 | 4.80E-06 |
| RBM20 | -0.997 | 1.45E-05 |
| C22orf23 | 0.981 | 0.000556 |
| AGMAT | -0.996 | 1.91E-05 |
| HAND2 | 0.984 | 0.000392 |
| EDNRA | -0.975 | 0.000953 |
| ACTA2 | 0.997 | 1.04E-05 |
| EHD2 | -0.997 | 1.20E-05 |
| C3orf52 | -0.992 | 0.000106 |
| CDK14 | -0.997 | 1.70E-05 |
| SLC6A12 | 0.993 | 8.27E-05 |
| CD248 | -0.989 | 0.000173 |
| FKBP11 | -0.994 | 4.91E-05 |
| PARP14 | 0.998 | 3.99E-06 |
| CUZD1 | -0.982 | 0.000459 |
| FAM57B | 0.977 | 0.000793 |
| TEX36 | -0.989 | 0.000197 |
| IL21R | 0.979 | 0.000644 |
| H1F0 | 0.995 | 3.61E-05 |
| TRIM29 | -0.989 | 0.000197 |
| CPVL | -0.993 | 6.63E-05 |
| P2RY2 | 0.992 | 0.000102 |
| CASKIN1 | 0.993 | 6.44E-05 |
| MICU3 | 0.998 | 6.03E-06 |
| HES6 | 0.989 | 0.000173 |
| HOXD1 | 0.978 | 0.000746 |
| KIAA1324L | -0.985 | 0.000322 |
| SVIL | 0.997 | 1.61E-05 |
| RUNX3 | -0.997 | 1.15E-05 |
| SLC44A3 | 0.998 | 7.82E-06 |
| NETO2 | -0.995 | 3.34E-05 |
| IFITM2 | -0.996 | 2.99E-05 |
| NFATC1 | 0.995 | 3.83E-05 |
| MAP1B | 0.998 | 5.63E-06 |
| KRT86 | -0.991 | 0.000122 |
| BAG1 | -0.998 | 3.84E-06 |
| SKIDA1 | 0.994 | 6.24E-05 |
| ART5 | 0.977 | 0.000775 |
| SLC39A6 | -0.986 | 0.00028 |
| CTF1 | 0.994 | 5.87E-05 |
| PITPNM3 | -0.992 | 0.000104 |
| ATP11B | 0.996 | 2.85E-05 |
| PIEZO2 | -0.985 | 0.000336 |
| ZNF846 | 0.997 | 1.76E-05 |
| PYROXD2 | -0.987 | 0.000261 |
| A4GALT | -0.996 | 3.01E-05 |
| NLRP1 | -0.993 | 7.68E-05 |
| ODF3L1 | -0.984 | 0.000384 |
| LYPLAL1 | -0.992 | 9.19E-05 |
| LRRC10B | 0.987 | 0.000265 |
| TAGLN | 0.999 | 3.11E-06 |
| ZNF256 | 0.999 | 3.77E-07 |
| PNMA2 | 0.98 | 0.0006 |
| TRPS1 | -0.984 | 0.00037 |
| KCNK13 | 0.992 | 0.000107 |
| TUBB4A | 0.997 | 1.75E-05 |
| TMEM144 | 0.99 | 0.000138 |
| DNAJB13 | 0.987 | 0.000251 |
| PRKCE | -0.997 | 1.06E-05 |
| PDIA2 | 0.994 | 6.22E-05 |
| HID1 | 0.994 | 5.63E-05 |
| NUDT11 | 0.999 | 2.70E-06 |
| RNF157 | 0.999 | 1.20E-06 |
| GIMAP1-GIMAP5 | 0.996 | 2.69E-05 |
| FSCN1 | -0.994 | 5.02E-05 |
| IQCD | 0.999 | 2.26E-06 |
| DBNDD2 | 0.998 | 5.18E-06 |
| LMX1B | 0.995 | 3.30E-05 |
| CFAP97 | 0.979 | 0.000644 |
| COL12A1 | -0.998 | 4.11E-06 |
| SHANK1 | 0.976 | 0.000844 |
| SLCO4A1 | -0.986 | 0.000303 |
| PCDHGB7 | 0.99 | 0.000152 |
| SLC16A6 | -0.987 | 0.000267 |
| LRIG1 | -0.998 | 6.86E-06 |
| TLR3 | 0.994 | 5.53E-05 |
| PRKX | -0.996 | 2.30E-05 |
| FOLR1 | -0.995 | 3.05E-05 |
| MECOM | -0.985 | 0.000322 |
| INPP4B | 0.99 | 0.00015 |
| LTK | -0.99 | 0.00015 |
| BICC1 | -0.998 | 6.99E-06 |
| NFRKB | -0.999 | 1.44E-06 |
| TMEM229B | 0.994 | 5.00E-05 |
| ZNF595 | 0.998 | 8.67E-06 |
| LTBP3 | 0.998 | 7.63E-06 |
| SMO | 0.999 | 2.36E-06 |
| KLHDC7B | -0.988 | 0.000233 |
| TTYH2 | 0.983 | 0.000409 |
| HDAC9 | -0.989 | 0.000195 |
| CAPN12 | 0.994 | 4.90E-05 |
| ANTXR1 | -0.998 | 5.61E-06 |
| CSGALNACT1 | -0.99 | 0.000163 |
| PPAPDC3 | 0.998 | 5.92E-06 |
| C3orf36 | -0.99 | 0.000148 |
| TEAD1 | -0.979 | 0.000651 |
| SAMD15 | 0.978 | 0.000695 |
| MED12 | -0.993 | 7.44E-05 |
| MLLT11 | 0.993 | 6.70E-05 |
| DUSP4 | -0.998 | 3.62E-06 |
| LGALS9C | -0.998 | 5.36E-06 |
| ARHGEF16 | -0.992 | 9.32E-05 |
| EPHA4 | -0.995 | 4.05E-05 |
| NIM1K | 0.99 | 0.000142 |
| P2RX4 | 0.999 | 1.38E-06 |
| ASS1 | -0.997 | 1.04E-05 |
| TNFSF12 | -0.996 | 2.64E-05 |
| S100A6 | -0.989 | 0.000168 |
| SLIT2 | 1 | 6.57E-08 |
| MAGED1 | 0.998 | 3.45E-06 |
| FBXO27 | 0.996 | 2.63E-05 |
| RTN4RL1 | 0.992 | 0.0001 |
| DNAH6 | 0.974 | 0.000976 |
| PLXDC1 | 0.984 | 0.0004 |
| MERTK | 0.993 | 6.49E-05 |
| PHLDA1 | -0.996 | 2.66E-05 |
| SNCA | -0.998 | 4.30E-06 |
| CLEC11A | 0.995 | 4.31E-05 |
| MORC3 | 0.998 | 5.35E-06 |
| DSC2 | -0.985 | 0.000326 |
| EML4 | 0.986 | 0.00031 |
| XKR9 | 0.984 | 0.000394 |
| ARHGDIG | 0.999 | 1.92E-06 |
| FOS | -0.994 | 6.27E-05 |
| EMC10 | -0.987 | 0.000241 |
| OLFM2 | 0.986 | 0.00031 |
| C8orf33 | -0.998 | 5.12E-06 |
| CIB2 | 0.999 | 6.18E-07 |
| ALDH3A1 | -0.996 | 2.36E-05 |
| CASC10 | 0.998 | 6.38E-06 |
| BEND7 | 1 | 2.79E-07 |
| A1BG | 0.996 | 1.95E-05 |
| TREX1 | -0.993 | 7.05E-05 |
| HSD3B7 | 1 | 4.50E-08 |
| MAL2 | -0.982 | 0.000461 |
| OLFML3 | -0.975 | 0.000912 |
| GPX1 | -0.986 | 0.000293 |
| LAMA1 | -0.992 | 0.000106 |
| BNC2 | -0.987 | 0.000257 |
| THEM6 | -0.978 | 0.000726 |
| P3H2 | -0.997 | 1.06E-05 |
| SERPINB5 | -0.995 | 3.65E-05 |
| HSPB3 | -0.997 | 1.64E-05 |
| ISM2 | 0.978 | 0.000694 |
| NFASC | 0.997 | 1.47E-05 |
| PIK3AP1 | 0.994 | 5.73E-05 |
| TRAPPC3L | 0.995 | 3.36E-05 |
| SAMD14 | 0.998 | 3.72E-06 |
| ADRB2 | -0.992 | 9.13E-05 |
| KCNH6 | 0.996 | 2.27E-05 |
| H2AFY2 | 0.999 | 1.20E-06 |
| CMTM7 | 0.999 | 3.92E-07 |
| MYO1F | 0.994 | 6.17E-05 |
| CTSK | 0.988 | 0.000204 |
| PARD6A | 0.992 | 9.49E-05 |
| DLX5 | 0.991 | 0.000125 |
| SIX1 | 0.993 | 7.49E-05 |
| GLDN | -0.998 | 6.03E-06 |
| C2orf72 | 0.997 | 1.22E-05 |
| ADPRH | -0.979 | 0.000663 |
| RIMS2 | 0.999 | 5.06E-07 |
| TBC1D3E | 0.977 | 0.000781 |
| OPN3 | -0.996 | 2.37E-05 |
| ELFN2 | -0.993 | 6.93E-05 |
| PCDHB3 | 0.974 | 0.000981 |
| NDNF | 0.994 | 5.44E-05 |
| BTNL9 | 0.996 | 2.33E-05 |
| CCND2 | 0.996 | 2.33E-05 |
| ANTXR2 | -0.991 | 0.000132 |
| MISP | -0.993 | 7.10E-05 |
| FERMT1 | -0.996 | 2.55E-05 |
| APBB1 | 0.997 | 1.22E-05 |
| LONRF2 | 0.991 | 0.000111 |
| NCK2 | 0.997 | 1.42E-05 |
| CASP10 | 0.995 | 3.31E-05 |
| ZNF44 | 0.998 | 6.95E-06 |
| ONECUT2 | -0.983 | 0.000428 |
| KIF17 | 0.998 | 5.12E-06 |
| TMEM52B | -0.977 | 0.000791 |
| KCNT2 | 0.99 | 0.000151 |
| ZFP69 | -0.995 | 3.56E-05 |
| TLX1 | 0.999 | 4.40E-07 |
| HOXA7 | -0.994 | 5.29E-05 |
| TXNIP | -0.998 | 6.38E-06 |
| TNFRSF21 | -0.995 | 3.87E-05 |
| SGCA | 0.989 | 0.000168 |
| TBX15 | 1 | 1.69E-07 |
| SLC1A3 | -0.998 | 4.91E-06 |
| C10orf32-ASMT | 0.999 | 2.64E-06 |
| HOXB8 | 0.993 | 8.02E-05 |
| PODNL1 | -0.988 | 0.000206 |
| SLC44A2 | 0.998 | 7.46E-06 |
| PPP2R3A | 0.992 | 0.0001 |
| MTUS2 | -0.99 | 0.000159 |
| FAM63A | 0.997 | 1.25E-05 |
| CCDC149 | 0.994 | 5.89E-05 |
| NOS2 | 0.986 | 0.000274 |
| ESPN | 0.994 | 5.73E-05 |
| ZNF549 | 0.999 | 5.97E-07 |
| KLF12 | -0.993 | 6.61E-05 |
| CAMK2B | 0.979 | 0.000655 |
| MMP3 | 0.999 | 3.33E-06 |
| GSPT2 | 0.999 | 2.84E-06 |
| PEG10 | -0.997 | 1.29E-05 |
| MAGEA12 | -0.995 | 3.14E-05 |
| MSI1 | 0.997 | 1.68E-05 |
| FZD3 | 0.995 | 4.15E-05 |
| RTKN2 | -0.981 | 0.000535 |
| TIAM1 | 0.999 | 2.38E-06 |
| TMEM253 | 0.993 | 7.82E-05 |
| CYB5A | -0.996 | 1.94E-05 |
| C1QTNF1 | -0.996 | 2.74E-05 |
| SNX10 | 0.986 | 0.000299 |
| EPS8L2 | -0.994 | 4.75E-05 |
| ODF2L | 0.996 | 2.55E-05 |
| IL2RG | -0.999 | 2.35E-06 |
| TRIM16 | -0.991 | 0.000127 |
| TMEM190 | -0.986 | 0.000294 |
| CHD5 | 0.998 | 5.42E-06 |
| AFAP1L1 | -0.999 | 7.63E-07 |
| FBXO15 | 0.989 | 0.000168 |
| JAM2 | 0.986 | 0.000296 |
| ANKRD20A2 | 0.997 | 1.41E-05 |
| NR0B1 | -0.976 | 0.000847 |
| ABCA5 | 0.981 | 0.000538 |
| GOLGA8N | 0.993 | 7.77E-05 |
| CXCL2 | -0.989 | 0.000197 |
| E2F8 | 0.985 | 0.000344 |
| SNED1 | -0.992 | 0.000107 |
| CADM1 | -0.997 | 1.19E-05 |
| RASSF2 | 0.99 | 0.000158 |
| YPEL3 | -0.984 | 0.000395 |
| BTBD6 | -0.984 | 0.000373 |
| STAP2 | 0.997 | 1.42E-05 |
| HTR1D | -0.979 | 0.000685 |
| AC104532.2 | 0.98 | 0.000608 |
| DDAH2 | 1 | 3.37E-08 |
| SLC17A9 | -0.99 | 0.000159 |
| LSR | 0.999 | 3.77E-07 |
| TIMP3 | -0.997 | 1.13E-05 |
| HIC1 | 1 | 9.88E-08 |
| REPS2 | -0.997 | 1.77E-05 |
| TP73 | 0.998 | 5.28E-06 |
| ICA1L | 0.996 | 2.82E-05 |
| SEMA4G | 0.999 | 2.30E-06 |
| MIB2 | -0.987 | 0.000243 |
| ABHD1 | -0.99 | 0.000135 |
| GPR158 | 0.979 | 0.000681 |
| NAB2 | 0.999 | 2.88E-06 |
| ROBO3 | 0.998 | 5.63E-06 |
| GNG7 | 0.999 | 3.18E-06 |
| HRH2 | 0.993 | 8.12E-05 |
| PIGW | -0.989 | 0.000185 |
| IKZF3 | 0.996 | 2.74E-05 |
| NRP2 | -0.996 | 1.84E-05 |
| ANGPTL4 | 0.999 | 2.08E-06 |
| FBLN7 | 0.999 | 8.27E-07 |

**Table S3**. The promoter sequence of GJB1.

>GJB1 promoter

aagatcaaacaaagtaatacaaaacaatttgaacattgcctttaatgcattaagtacacgggaaacggtagtcctctctatccattacaacttgtactctcagcgggaagaatggtgttcagcctgtcccccacccaccatgatgtccagctcagttttgccttttaccaagtttaccaggcacaactaaaggattccctatctggctttaaatgtcctccatactctaagcctcttaactgactgacagtttcctccacagcccctcaacacagtcctgcctccttactggctcccagatatgccttgctcgttcctactctgtgccttcactcacactgttcctcctccctggaatgctaacccggtccttccccttccagctcctacctgtcttttacttctccactcaaacctcacttcctctaggaagccttccctgattacttcagtttattctcatcattcccttctctggactctctcaggaatcaaagttagtgaatacgcactgatatttttcacaacaatttattgggtcttggtcccctctcctccagaagttcggcagggcatgatagctcacacctgtaatcccagtgctttgggaggctgaggcgggcagatcacttgaggtcaggagttcgagaccagcctggccaacgtggtgaaaccccatctctactaaaaatacaaaaattagctaggcgcctgtaatcccagctactcgtgaggctgaggcagaagaatcgcttgaacccgggaggcggaggttgcagtgagccaagattgcgccactgcactctagcctgggtgacagagtgagactgagtctcaaaaaaaagaagttgataaatctcttatgaacagttgggatgttttcacctcctttgccacctgcacccagcacgtagccctatgctgggttcctagtaggtgtccaatactcatggattgatgtatccatatgcccaggtttggctaagggaagctgaggccctggctccctttctagcagtgagctcaagctggagtgaagaacagaaggcagggggccagtttctctgctaacttcccttgtttctccactgccattcaggccacagaacacagcagggtcttcaggtaagccgtcagtggtgcagaccttgaaactagactgatccctcagttaatggttgacagtctctgtttaccttaatgattgccaagattcattactgaacatgatacactttgcagttcaactgccttggccttgagggtagaaagcaatttctgaggttttagggttctgggataggattagaaatacttgggtccatccccagccactcaggatgtggacaataagcaagtggccggagggcaccctggtactgccatatgggtgggaagcactgccagctcccaccttgacctcaggtgccagcaggcatcacccatggctttttcctccccattgtcatctaatgtgtttatttatttatactttttgtagagatggggtcttactatgttgcccaggctggtctcaaactcctggcttcaagtgatcctcccgccttggccaaagtgctgggattacaggcatgagccaccatgcccggccctgtcatacagttttagaggctgggagctagaagggttgaccaggatggcagcctgtacaggatccctctctgcagcttgcccgcactgtggatctgcctaaggccagggcatgggggaagcctgagggatgctgaggagcacaggtccagctcagtctcccagagagactaaacatgggtgggtgacaatgatgcctctcttcctctgggacaaggcagtgactccaggctatgtgatctgtctctccaaacccatagggagctcagaggatcaatcttgtttaatgattgtatgtgggaggaggtggggctggttaatgtttgtctggttcctcttgggctgtgggccatttctggctctggccctgggttcgttgtccctcccct

**Table S4**. The TF predicted by animalTFDB.

| TF | score | start | stop | strand | score | pvalue | qvalue | mathed sequence |
| --- | --- | --- | --- | --- | --- | --- | --- | --- |
| GTF3C2 | hTFtarget | 638 | 659 | + | 35.2571 | 2.83E-14 | 1.12E-10 | CAGGAGTTCGAGACCAGCCTGG |
| GTF3C2 | hTFtarget | 677 | 701 | + | 36.2078 | 1.06E-13 | 4.18E-10 | CATCTCTACTAAAAATACAAAAATT |
| IRF5 | hTFtarget | 1590 | 1611 | + | 30.2078 | 3.02E-13 | 1.16E-09 | GGCATGAGCCACCATGCCCGGC |
| GLYR1 | hTFtarget | 1517 | 1536 | + | 32.8659 | 5.57E-13 | 2.15E-09 | ATGTTGCCCAGGCTGGTCTC |
| TRIM24 | hTFtarget | 687 | 708 | + | 25.6923 | 1.33E-12 | 5.25E-09 | AAAAATACAAAAATTAGCTAGG |
| GLYR1 | hTFtarget | 711 | 730 | - | 34.1316 | 2.74E-12 | 1.08E-08 | CGAGTAGCTGGGATTACAGG |
| GLYR1 | hTFtarget | 672 | 691 | + | 31.506 | 5.43E-12 | 2.15E-08 | AACCCCATCTCTACTAAAAA |
| SP2 | hTFtarget | 1575 | 1595 | - | 22.3291 | 1.53E-11 | 5.97E-08 | CATGCCTGTAATCCCAGCACT |
| GTF3C2 | hTFtarget | 1524 | 1545 | - | 30.2 | 3.63E-11 | 7.18E-08 | CAGGAGTTTGAGACCAGCCTGG |
| GLYR1 | hTFtarget | 608 | 629 | - | 30.3816 | 6.60E-11 | 2.57E-07 | TGATCTGCCCGCCTCAGCCTCC |
| GLYR1 | hTFtarget | 647 | 666 | - | 28.2927 | 1.47E-10 | 2.83E-07 | ACGTTGGCCAGGCTGGTCTC |
| GLYR1 | hTFtarget | 731 | 752 | - | 29.2105 | 1.60E-10 | 3.11E-07 | CGATTCTTCTGCCTCAGCCTCA |
| GLYR1 | hTFtarget | 1572 | 1591 | + | 29.1447 | 1.68E-10 | 3.31E-07 | CAAAGTGCTGGGATTACAGG |
| POLR3A | database | 637 | 652 | + | 24.1636 | 1.77E-10 | 6.96E-07 | TCAGGAGTTCGAGACC |
| IRF5 | hTFtarget | 607 | 625 | - | 28.25 | 1.94E-10 | 7.06E-07 | CTGCCCGCCTCAGCCTCCC |
| GTF3C2 | hTFtarget | 607 | 622 | - | 26.6386 | 2.27E-10 | 8.44E-07 | CCCGCCTCAGCCTCCC |
| GLYR1 | hTFtarget | 1492 | 1511 | - | 27.8072 | 2.32E-10 | 4.59E-07 | GACCCCATCTCTACAAAAAG |
| POLR3A | hTFtarget | 602 | 623 | - | 27.3684 | 2.72E-10 | 1.07E-06 | GCCCGCCTCAGCCTCCCAAAGC |
| GTF3C2 | hTFtarget | 1482 | 1506 | - | 27.7403 | 3.90E-10 | 7.69E-07 | CATCTCTACAAAAAGTATAAATAAA |
| TRIM24 | hTFtarget | 711 | 726 | + | 24.2805 | 5.38E-10 | 2.07E-06 | CCTGTAATCCCAGCTA |
| LMNB1 | hTFtarget | 608 | 623 | - | 26.7927 | 8.39E-10 | 3.13E-06 | GCCCGCCTCAGCCTCC |
| GTF3C2 | hTFtarget | 608 | 629 | - | 24.7952 | 8.66E-10 | 2.89E-06 | TGATCTGCCCGCCTCAGCCTCC |
| TRIM24 | hTFtarget | 1576 | 1591 | - | 23.2561 | 1.43E-09 | 2.75E-06 | CCTGTAATCCCAGCAC |
| SP2 | hTFtarget | 607 | 628 | - | 24.1688 | 1.60E-09 | 5.99E-06 | GATCTGCCCGCCTCAGCCTCCC |
| IRF5 | hTFtarget | 749 | 764 | + | 21.0779 | 1.98E-09 | 7.84E-06 | ATCGCTTGAACCCGGG |
| GTF3C2 | hTFtarget | 1507 | 1522 | + | 24.5526 | 3.30E-09 | 1.29E-05 | GGGTCTTACTATGTTG |
| KDM1A | hTFtarget | 605 | 626 | + | 22.3662 | 7.74E-09 | 2.74E-05 | TTGGGAGGCTGAGGCGGGCAGA |
| SP2 | hTFtarget | 608 | 626 | - | 23.4805 | 7.99E-09 | 2.98E-05 | TCTGCCCGCCTCAGCCTCC |
| SP2 | hTFtarget | 1593 | 1608 | + | 20.75 | 8.19E-09 | 3.18E-05 | ATGAGCCACCATGCCC |
| IRF5 | hTFtarget | 1542 | 1557 | - | 20.0649 | 9.96E-09 | 1.98E-05 | ATCACTTGAAGCCAGG |
| ZNF143 | hTFtarget | 1596 | 1611 | - | 21.7237 | 1.10E-08 | 3.83E-05 | GCCGGGCATGGTGGCT |
| ZNF143 | hTFtarget | 607 | 626 | - | 22.4857 | 1.13E-08 | 3.70E-05 | TCTGCCCGCCTCAGCCTCCC |
| GTF3C2 | hTFtarget | 676 | 697 | + | 20.8077 | 1.46E-08 | 5.77E-05 | CCATCTCTACTAAAAATACAAA |
| GTF3C2 | hTFtarget | 661 | 676 | - | 22.7632 | 1.59E-08 | 3.13E-05 | GGGTTTCACCACGTTG |
| IRF5 | hTFtarget | 626 | 641 | + | 19.5844 | 2.03E-08 | 2.68E-05 | ATCACTTGAGGTCAGG |
| IRF5 | hTFtarget | 730 | 748 | - | 22.1711 | 2.35E-08 | 4.28E-05 | TCTTCTGCCTCAGCCTCAC |
| TRIM24 | hTFtarget | 761 | 782 | + | 21.8684 | 2.48E-08 | 8.12E-05 | CGGGAGGCGGAGGTTGCAGTGA |
| GLYR1 | hTFtarget | 588 | 607 | - | 20.8026 | 3.40E-08 | 4.46E-05 | CAAAGCACTGGGATTACAGG |
| ZNF143 | hTFtarget | 587 | 600 | + | 20.0658 | 3.78E-08 | 0.000147 | ACCTGTAATCCCAG |
| IRF5 | hTFtarget | 713 | 724 | - | 21.5658 | 5.62E-08 | 0.000111 | GCTGGGATTACA |
| IRF5 | hTFtarget | 1578 | 1589 | + | 21.5658 | 5.62E-08 | 0.000111 | GCTGGGATTACA |
| GTF3C2 | hTFtarget | 658 | 673 | + | 19.8553 | 6.06E-08 | 0.000235 | GGCCAACGTGGTGAAA |
| POLR3A | hTFtarget | 1573 | 1588 | - | 18.6447 | 6.14E-08 | 0.000236 | GTAATCCCAGCACTTT |
| GTF2I | hTFtarget | 342 | 357 | + | 19.6623 | 7.72E-08 | 0.000292 | TTCCTCCTCCCTGGAA |
| THRA | database | 624 | 640 | + | 17.2771 | 8.00E-08 | 0.000304 | AGATCACTTGAGGTCAG |
| THRA | database | 624 | 640 | - | 17.23 | 8.07E-08 | 0.000307 | CTGACCTCAAGTGATCT |
| GTF3C2 | hTFtarget | 1573 | 1594 | - | 19.0513 | 9.50E-08 | 0.000188 | ATGCCTGTAATCCCAGCACTTT |
| CBX3 | hTFtarget | 1064 | 1085 | - | 19.6364 | 9.72E-08 | 0.000372 | AGAAACAAGGGAAGTTAGCAGA |
| FOXP1 | hTFtarget | 1073 | 1094 | - | 18.4474 | 1.31E-07 | 0.000515 | TGGCAGTGGAGAAACAAGGGAA |
| ZNF92 | hTFtarget | 420 | 435 | - | 19.1111 | 1.61E-07 | 0.000628 | GGCTTCCTAGAGGAAG |
| SPI1 | hTFtarget | 1799 | 1814 | + | 18.3506 | 1.63E-07 | 0.000648 | ACAATGATGCCTCTCT |
| TP53 | hTFtarget | 466 | 477 | - | 16.4487 | 1.81E-07 | 0.000694 | CAGAGAAGGGAA |
| ZNF143 | hTFtarget | 1579 | 1592 | - | 19.1053 | 1.89E-07 | 0.000244 | GCCTGTAATCCCAG |
| ZNF143 | hTFtarget | 710 | 723 | + | 19.1053 | 1.89E-07 | 0.000244 | GCCTGTAATCCCAG |
| SMARCA4 | hTFtarget | 684 | 699 | + | 17.6667 | 2.08E-07 | 0.000825 | ACTAAAAATACAAAAA |
| POLR3A | database | 1531 | 1546 | - | 18.9182 | 2.09E-07 | 0.00041 | CCAGGAGTTTGAGACC |
| ZNF263 | hTFtarget | 342 | 353 | + | 18.7857 | 2.10E-07 | 0.000815 | TTCCTCCTCCCT |
| GTF3C2 | hTFtarget | 624 | 635 | + | 19.6842 | 2.17E-07 | 0.000864 | AGATCACTTGAG |
| GTF2I | hTFtarget | 1514 | 1529 | + | 18.6184 | 2.32E-07 | 0.000911 | ACTATGTTGCCCAGGC |
| LMNB1 | hTFtarget | 731 | 746 | - | 18.4634 | 2.44E-07 | 0.000455 | TTCTGCCTCAGCCTCA |
| TRIM24 | hTFtarget | 606 | 627 | + | 18.6974 | 2.47E-07 | 0.000404 | TGGGAGGCTGAGGCGGGCAGAT |
| POLR3A | hTFtarget | 1579 | 1595 | - | 18.9 | 2.49E-07 | 0.000972 | CATGCCTGTAATCCCAG |
| SPI1 | hTFtarget | 1912 | 1926 | + | 18.2763 | 2.55E-07 | 0.000985 | GAGGAGGTGGGGCTG |
| SP1 | database | 1909 | 1927 | + | 18.3371 | 2.75E-07 | 0.000959 | TGGGAGGAGGTGGGGCTGG |
| GTF2I | hTFtarget | 342 | 357 | + | 18.3012 | 2.86E-07 | 0.00109 | TTCCTCCTCCCTGGAA |
| SP2 | database | 1910 | 1924 | - | 18.1724 | 2.90E-07 | 0.00108 | GCCCCACCTCCTCCC |
| BRD7 | hTFtarget | 814 | 832 | + | 18.0519 | 2.93E-07 | 0.00115 | GTGACAGAGTGAGACTGAG |
| RCOR1 | hTFtarget | 987 | 1002 | - | 18.338 | 3.03E-07 | 0.00115 | CAGGGCCTCAGCTTCC |
| BCL11A | hTFtarget | 1106 | 1117 | - | 16.1714 | 3.15E-07 | 0.0012 | CCTGCTGTGTTC |
| GTF3C2 | hTFtarget | 638 | 652 | + | 18.9429 | 3.22E-07 | 0.00128 | CAGGAGTTCGAGACC |
| FLI1 | hTFtarget | 1036 | 1060 | - | -2.94286 | 3.30E-07 | 0.00115 | ACTGGCCCCCTGCCTTCTGTTCTTC |
| BHLHE40 | hTFtarget | 1910 | 1924 | - | 18.4474 | 3.49E-07 | 0.00125 | GCCCCACCTCCTCCC |
| GTF3C2 | hTFtarget | 598 | 619 | + | 18.3947 | 3.87E-07 | 0.00149 | CAGTGCTTTGGGAGGCTGAGGC |
| SP1 | hTFtarget | 1911 | 1926 | + | 18 | 4.16E-07 | 0.00154 | GGAGGAGGTGGGGCTG |
| KDM1A | hTFtarget | 760 | 781 | + | 17.831 | 4.39E-07 | 0.000777 | CCGGGAGGCGGAGGTTGCAGTG |
| TBX2 | database | 575 | 599 | + | 18.19 | 4.58E-07 | 0.00181 | ATGATAGCTCACACCTGTAATCCCA |
| ZNF263 | hTFtarget | 337 | 352 | - | 17.9697 | 4.62E-07 | 0.00172 | GGGAGGAGGAACAGTG |
| TBX2 | database | 575 | 599 | - | 18.0721 | 4.66E-07 | 0.00183 | TGGGATTACAGGTGTGAGCTATCAT |
| HIC1 | database | 1360 | 1377 | - | 16.3684 | 4.84E-07 | 0.00173 | CCAGGGTGCCCTCCGGCC |
| EZH2 | hTFtarget | 1448 | 1459 | - | 16.9221 | 5.34E-07 | 0.00203 | GGAGGAAAAAGC |
| ETS1 | hTFtarget | 633 | 655 | - | 15.5857 | 5.46E-07 | 0.00212 | GCTGGTCTCGAACTCCTGACCTC |
| POLR3A | hTFtarget | 633 | 654 | - | 16.4714 | 5.64E-07 | 0.00221 | CTGGTCTCGAACTCCTGACCTC |
| GLYR1 | hTFtarget | 1554 | 1575 | + | 14.6053 | 5.94E-07 | 0.000771 | TGATCCTCCCGCCTTGGCCAAA |
| ZNF143 | hTFtarget | 675 | 699 | - | 15.6538 | 6.10E-07 | 0.0024 | TTTTTGTATTTTTAGTAGAGATGGG |
| SMAD1 | hTFtarget | 1109 | 1118 | - | 15.6857 | 6.13E-07 | 0.00229 | CCCTGCTGTG |
| GTF3C2 | hTFtarget | 1548 | 1559 | - | 18.1447 | 6.17E-07 | 0.00123 | GGATCACTTGAA |
| POLR2A | hTFtarget | 608 | 622 | - | 17.5263 | 6.29E-07 | 0.00227 | CCCGCCTCAGCCTCC |
| GLYR1 | hTFtarget | 801 | 820 | - | 16.6463 | 6.67E-07 | 0.000858 | CTGTCACCCAGGCTAGAGTG |
| ZNF263 | database | 338 | 352 | - | 17.1735 | 6.82E-07 | 0.00249 | GGGAGGAGGAACAGT |
| GTF2I | hTFtarget | 732 | 747 | - | 16.3286 | 7.35E-07 | 0.00275 | CTTCTGCCTCAGCCTC |
| TEAD4 | hTFtarget | 349 | 360 | - | 16.4848 | 7.65E-07 | 0.00302 | GCATTCCAGGGA |
| BDP1 | database | 641 | 652 | - | 16.1712 | 8.14E-07 | 0.00323 | GGTCTCGAACTC |
| ZNF92 | hTFtarget | 1341 | 1356 | - | 17.0952 | 8.14E-07 | 0.00323 | TGCTTATTGTCCACAT |
| PHF8 | hTFtarget | 732 | 747 | + | 17.1711 | 8.17E-07 | 0.00318 | GAGGCTGAGGCAGAAG |
| SPI1 | hTFtarget | 417 | 427 | - | 16.5921 | 8.27E-07 | 0.00324 | AGAGGAAGTGA |
| BRD4 | hTFtarget | 369 | 390 | + | 16.7792 | 8.71E-07 | 0.00317 | TCCTTCCCCTTCCAGCTCCTAC |
| SP2 | hTFtarget | 758 | 781 | - | 16.9079 | 8.78E-07 | 0.0027 | CACTGCAACCTCCGCCTCCCGGGT |
| SPI1 | hTFtarget | 1799 | 1814 | + | 16.3718 | 8.81E-07 | 0.0035 | ACAATGATGCCTCTCT |
| HNF1A | database | 1923 | 1943 | - | 15.3763 | 8.88E-07 | 0.00351 | ACCAGACAAACATTAACCAGC |
| EP300 | hTFtarget | 1188 | 1199 | - | 14.1429 | 8.94E-07 | 0.00356 | AAGGTAAACAGA |
| SPI1 | database | 418 | 427 | - | 13.3947 | 9.09E-07 | 0.00354 | AGAGGAAGTG |
| SPI1 | hTFtarget | 1914 | 1925 | - | 16.8553 | 9.21E-07 | 0.00345 | AGCCCCACCTCC |
| SPI1 | hTFtarget | 415 | 426 | - | 16.5921 | 9.33E-07 | 0.00357 | GAGGAAGTGAGG |
| YY1 | hTFtarget | 763 | 778 | - | 16.8684 | 9.45E-07 | 0.00319 | TGCAACCTCCGCCTCC |
| GTF3C2 | hTFtarget | 731 | 752 | - | 16.747 | 9.47E-07 | 0.00158 | CGATTCTTCTGCCTCAGCCTCA |
| KDM1A | hTFtarget | 728 | 749 | + | 16.8028 | 9.52E-07 | 0.00112 | TCGTGAGGCTGAGGCAGAAGAA |
| SPI1 | hTFtarget | 1911 | 1926 | - | 17.0429 | 9.69E-07 | 0.00367 | CAGCCCCACCTCCTCC |
| SPI1 | hTFtarget | 1911 | 1926 | + | 16.9868 | 9.92E-07 | 0.00374 | GGAGGAGGTGGGGCTG |
| SETDB1 | hTFtarget | 410 | 421 | + | 16.4474 | 1.04E-06 | 0.00412 | TCAAACCTCACT |
| HNF1B | database | 1170 | 1183 | + | 15.8824 | 1.05E-06 | 0.00419 | AGTTAATGGTTGAC |
| SPI1 | hTFtarget | 1911 | 1926 | - | 17.0789 | 1.05E-06 | 0.00396 | CAGCCCCACCTCCTCC |
| HNF1B | database | 1170 | 1183 | - | 15.8333 | 1.07E-06 | 0.00427 | GTCAACCATTAACT |
| IRF5 | hTFtarget | 590 | 601 | - | 17.1711 | 1.13E-06 | 0.00149 | ACTGGGATTACA |
| ZKSCAN1 | hTFtarget | 312 | 327 | + | 15.9545 | 1.13E-06 | 0.00447 | CGTTCCTACTCTGTGC |
| RXRA | hTFtarget | 417 | 428 | + | 15.8816 | 1.14E-06 | 0.0045 | TCACTTCCTCTA |
| SIN3A | hTFtarget | 372 | 387 | - | 16.5658 | 1.14E-06 | 0.004 | GGAGCTGGAAGGGGAA |
| POLR3A | hTFtarget | 1596 | 1611 | - | 16.5714 | 1.21E-06 | 0.00459 | GCCGGGCATGGTGGCT |
| CREBBP | hTFtarget | 816 | 830 | + | 15.0746 | 1.22E-06 | 0.00444 | GACAGAGTGAGACTG |
| FOXD1 | database | 1187 | 1201 | + | 15.81 | 1.23E-06 | 0.0049 | CTCTGTTTACCTTAA |
| SPI1 | hTFtarget | 1912 | 1927 | + | 16.7105 | 1.24E-06 | 0.0047 | GAGGAGGTGGGGCTGG |
| LMNB1 | hTFtarget | 1409 | 1424 | + | 15.3659 | 1.26E-06 | 0.00156 | TCCCACCTTGACCTCA |
| NOTCH1 | hTFtarget | 1361 | 1380 | + | 16.3289 | 1.31E-06 | 0.00443 | GCCGGAGGGCACCCTGGTAC |
| ZBTB33 | hTFtarget | 1908 | 1923 | - | 16.5921 | 1.31E-06 | 0.00478 | CCCCACCTCCTCCCAC |
| ZNF263 | hTFtarget | 1910 | 1921 | + | 17.0571 | 1.32E-06 | 0.00508 | GGGAGGAGGTGG |
| E2F7 | hTFtarget | 1911 | 1926 | - | 16.7714 | 1.33E-06 | 0.00492 | CAGCCCCACCTCCTCC |
| SOX8 | database | 490 | 506 | + | 9.07143 | 1.34E-06 | 0.00529 | AATCAAAGTTAGTGAAT |
| POLR2A | hTFtarget | 762 | 777 | - | 16.3714 | 1.35E-06 | 0.00366 | GCAACCTCCGCCTCCC |
| EP300 | hTFtarget | 1476 | 1487 | - | 15.4026 | 1.35E-06 | 0.00537 | AATAAATAAACA |
| RARB | database | 633 | 643 | + | 14.9898 | 1.39E-06 | 0.00524 | GAGGTCAGGAG |
| KLF9 | hTFtarget | 1910 | 1925 | + | 16.5303 | 1.39E-06 | 0.00513 | GGGAGGAGGTGGGGCT |
| PBX1 | hTFtarget | 1913 | 1924 | + | 16.4605 | 1.39E-06 | 0.00526 | AGGAGGTGGGGC |
| POLR2A | hTFtarget | 764 | 779 | + | 16.3421 | 1.39E-06 | 0.00544 | GAGGCGGAGGTTGCAG |
| RARB | database | 633 | 643 | - | 14.9898 | 1.39E-06 | 0.00527 | CTCCTGACCTC |
| GTF3C2 | hTFtarget | 1486 | 1507 | - | 16.0641 | 1.41E-06 | 0.00185 | CCATCTCTACAAAAAGTATAAA |
| SREBF1 | hTFtarget | 1914 | 1925 | - | 16.8026 | 1.43E-06 | 0.00545 | AGCCCCACCTCC |
| TAF1 | hTFtarget | 372 | 395 | - | 16.3289 | 1.43E-06 | 0.00504 | GACAGGTAGGAGCTGGAAGGGGAA |
| SPI1 | hTFtarget | 1911 | 1926 | - | 16.4429 | 1.44E-06 | 0.00548 | CAGCCCCACCTCCTCC |
| FOXJ2 | database | 1471 | 1488 | - | 15.5109 | 1.47E-06 | 0.00584 | AAATAAATAAACACATTA |
| SPI1 | hTFtarget | 1911 | 1926 | - | 16.4429 | 1.47E-06 | 0.00553 | CAGCCCCACCTCCTCC |
| CREB1 | hTFtarget | 417 | 428 | + | 15.7229 | 1.47E-06 | 0.00572 | TCACTTCCTCTA |
| TEAD4 | hTFtarget | 351 | 360 | + | 14.8788 | 1.49E-06 | 0.00594 | CCTGGAATGC |
| FLI1 | hTFtarget | 1036 | 1060 | - | -28.7727 | 1.53E-06 | 0.00561 | ACTGGCCCCCTGCCTTCTGTTCTTC |
| NFYB | hTFtarget | 1912 | 1926 | - | 16.4868 | 1.53E-06 | 0.00577 | CAGCCCCACCTCCTC |
| SOX10 | hTFtarget | 1795 | 1816 | + | 15.9242 | 1.54E-06 | 0.00611 | GGTGACAATGATGCCTCTCTTC |
| ZNF263 | database | 1910 | 1924 | + | 16.2653 | 1.54E-06 | 0.0028 | GGGAGGAGGTGGGGC |
| SPIB | hTFtarget | 415 | 426 | - | 15.4737 | 1.57E-06 | 0.00593 | GAGGAAGTGAGG |
| RUNX1 | hTFtarget | 416 | 427 | + | 15.9605 | 1.59E-06 | 0.00614 | CTCACTTCCTCT |
| ZNF263 | hTFtarget | 1910 | 1925 | + | 16.3788 | 1.60E-06 | 0.00297 | GGGAGGAGGTGGGGCT |
| USF2 | hTFtarget | 762 | 773 | - | 16.5526 | 1.62E-06 | 0.00596 | CCTCCGCCTCCC |
| HIF1A | hTFtarget | 816 | 834 | + | 15.5658 | 1.64E-06 | 0.00618 | GACAGAGTGAGACTGAGTC |
| TBX5 | database | 582 | 591 | + | 17.5688 | 1.65E-06 | 0.00649 | CTCACACCTG |
| SP2 | hTFtarget | 1316 | 1337 | - | 16.2895 | 1.65E-06 | 0.00622 | GAGTGGCTGGGGATGGACCCAA |
| RNF2 | hTFtarget | 1911 | 1926 | + | 14.8143 | 1.66E-06 | 0.00572 | GGAGGAGGTGGGGCTG |
| STAT5A | hTFtarget | 338 | 353 | - | 14.5526 | 1.69E-06 | 0.00648 | AGGGAGGAGGAACAGT |
| IRF5 | hTFtarget | 687 | 702 | + | 14.1299 | 1.70E-06 | 0.00673 | AAAAATACAAAAATTA |
| SP2 | hTFtarget | 790 | 805 | + | 16.1184 | 1.71E-06 | 0.00332 | TTGCGCCACTGCACTC |
| SP2 | hTFtarget | 1739 | 1760 | - | 16.1688 | 1.73E-06 | 0.00323 | GACCTGTGCTCCTCAGCATCCC |
| REST | hTFtarget | 1568 | 1581 | + | 14.4857 | 1.75E-06 | 0.00676 | TGGCCAAAGTGCTG |
| SPI1 | hTFtarget | 1912 | 1926 | - | 16.3026 | 1.75E-06 | 0.00634 | CAGCCCCACCTCCTC |
| RUNX1 | hTFtarget | 1910 | 1921 | + | 16.0658 | 1.76E-06 | 0.00666 | GGGAGGAGGTGG |
| CEBPB | hTFtarget | 788 | 801 | - | 15.2273 | 1.79E-06 | 0.00712 | GCAGTGGCGCAATC |
| CEBPD | hTFtarget | 788 | 799 | + | 15.4143 | 1.79E-06 | 0.00712 | GATTGCGCCACT |
| GTF2I | hTFtarget | 762 | 770 | - | 15.7571 | 1.83E-06 | 0.00662 | CCGCCTCCC |
| POLR2A | hTFtarget | 607 | 622 | - | 15.9 | 1.91E-06 | 0.00366 | CCCGCCTCAGCCTCCC |
| YY1 | hTFtarget | 763 | 778 | - | 15.75 | 1.91E-06 | 0.00686 | TGCAACCTCCGCCTCC |
| FOXP1 | database | 1187 | 1201 | - | 15.8451 | 1.95E-06 | 0.00774 | TTAAGGTAAACAGAG |
| FOXP1 | database | 1187 | 1201 | - | 15.83 | 1.95E-06 | 0.00772 | TTAAGGTAAACAGAG |
| E2F7 | hTFtarget | 1909 | 1924 | - | 16.1714 | 1.96E-06 | 0.0073 | GCCCCACCTCCTCCCA |
| SP2 | hTFtarget | 818 | 837 | - | 15.5789 | 1.97E-06 | 0.0076 | TGAGACTCAGTCTCACTCTG |
| SPI1 | hTFtarget | 1912 | 1926 | + | 16.0263 | 1.97E-06 | 0.00745 | GAGGAGGTGGGGCTG |
| SPI1 | hTFtarget | 1912 | 1927 | + | 16.1143 | 1.97E-06 | 0.00743 | GAGGAGGTGGGGCTGG |
| FLI1 | database | 414 | 430 | - | 14.7333 | 2.01E-06 | 0.00715 | CCTAGAGGAAGTGAGGT |
| PBX3 | hTFtarget | 241 | 250 | - | 15.1857 | 2.02E-06 | 0.00797 | CTGTCAGTCA |
| FLI1 | database | 414 | 430 | - | 14.7374 | 2.03E-06 | 0.00717 | CCTAGAGGAAGTGAGGT |
| SPI1 | hTFtarget | 760 | 784 | - | 15.5143 | 2.07E-06 | 0.00737 | GCTCACTGCAACCTCCGCCTCCCGG |
| PURA | database | 1911 | 1927 | + | 15.3069 | 2.09E-06 | 0.00447 | GGAGGAGGTGGGGCTGG |
| E2F7 | hTFtarget | 1909 | 1924 | + | 15.9143 | 2.09E-06 | 0.00767 | TGGGAGGAGGTGGGGC |
| SPI1 | hTFtarget | 415 | 426 | + | 15.5526 | 2.10E-06 | 0.00801 | CCTCACTTCCTC |
| BTAF1 | hTFtarget | 762 | 773 | + | 16.2237 | 2.12E-06 | 0.00806 | GGGAGGCGGAGG |
| PURA | database | 1911 | 1927 | - | 15.297 | 2.12E-06 | 0.00451 | CCAGCCCCACCTCCTCC |
| NFYB | hTFtarget | 1913 | 1924 | + | 15.9474 | 2.14E-06 | 0.00804 | AGGAGGTGGGGC |
| PRAME | hTFtarget | 1913 | 1924 | + | 15.9474 | 2.18E-06 | 0.00796 | AGGAGGTGGGGC |
| SPI1 | hTFtarget | 1911 | 1926 | - | 15.9571 | 2.18E-06 | 0.00814 | CAGCCCCACCTCCTCC |
| POLR3A | hTFtarget | 584 | 600 | + | 15.7571 | 2.20E-06 | 0.0043 | CACACCTGTAATCCCAG |
| STAT1 | hTFtarget | 369 | 390 | - | 14.8182 | 2.20E-06 | 0.00824 | GTAGGAGCTGGAAGGGGAAGGA |
| TAF1 | hTFtarget | 763 | 778 | + | 15.9605 | 2.20E-06 | 0.00805 | GGAGGCGGAGGTTGCA |
| KLF4 | hTFtarget | 129 | 137 | + | 14.3788 | 2.23E-06 | 0.00855 | CCCCACCCA |
| SPI1 | hTFtarget | 1908 | 1926 | - | 15.8857 | 2.23E-06 | 0.00828 | CAGCCCCACCTCCTCCCAC |
| STAT1 | hTFtarget | 1992 | 2000 | - | 15.3553 | 2.23E-06 | 0.00828 | AGGGGAGGG |
| ZNF143 | hTFtarget | 762 | 781 | - | 15.4857 | 2.23E-06 | 0.00284 | CACTGCAACCTCCGCCTCCC |
| EGR1 | database | 1911 | 1924 | - | 15.9615 | 2.30E-06 | 0.00883 | GCCCCACCTCCTCC |
| HAND2 | hTFtarget | 473 | 488 | + | 15.4242 | 2.30E-06 | 0.00908 | CTCTGGACTCTCTCAG |
| PURA | database | 987 | 1003 | + | 15.1683 | 2.38E-06 | 0.00447 | GGAAGCTGAGGCCCTGG |
| PHF8 | hTFtarget | 764 | 779 | + | 15.7105 | 2.38E-06 | 0.00464 | GAGGCGGAGGTTGCAG |
| RB1 | hTFtarget | 1913 | 1924 | + | 15.9474 | 2.38E-06 | 0.00892 | AGGAGGTGGGGC |
| MAZ | hTFtarget | 1910 | 1925 | - | 15.9545 | 2.40E-06 | 0.00885 | AGCCCCACCTCCTCCC |
| PURA | database | 987 | 1003 | - | 15.1683 | 2.40E-06 | 0.00451 | CCAGGGCCTCAGCTTCC |
| ATF3 | hTFtarget | 59 | 74 | - | 15.5 | 2.41E-06 | 0.00954 | GGACTACCGTTTCCCG |
| GTF3C2 | hTFtarget | 1759 | 1774 | + | 15.2289 | 2.42E-06 | 0.00449 | TCCAGCTCAGTCTCCC |
| TBP | hTFtarget | 1914 | 1925 | - | 15.7237 | 2.42E-06 | 0.00883 | AGCCCCACCTCC |
| TEAD4 | hTFtarget | 349 | 360 | + | 14.7121 | 2.44E-06 | 0.00969 | TCCCTGGAATGC |
| PITX2 | database | 590 | 599 | - | 13.4184 | 2.45E-06 | 0.00325 | TGGGATTACA |
| PITX2 | database | 713 | 722 | - | 13.4184 | 2.45E-06 | 0.00325 | TGGGATTACA |
| PITX2 | database | 1580 | 1589 | + | 13.4184 | 2.45E-06 | 0.00325 | TGGGATTACA |
| STAT1 | hTFtarget | 417 | 428 | - | 13.3143 | 2.45E-06 | 0.00943 | TAGAGGAAGTGA |
| PITX2 | database | 590 | 599 | + | 13.4184 | 2.45E-06 | 0.00325 | TGTAATCCCA |
| PITX2 | database | 713 | 722 | + | 13.4184 | 2.45E-06 | 0.00325 | TGTAATCCCA |
| PITX2 | database | 1580 | 1589 | - | 13.4184 | 2.45E-06 | 0.00325 | TGTAATCCCA |
| NFYB | hTFtarget | 1906 | 1917 | + | 13.7895 | 2.46E-06 | 0.00522 | ATGTGGGAGGAG |
| TRIM28 | hTFtarget | 1067 | 1086 | - | 13.6974 | 2.46E-06 | 0.0096 | GAGAAACAAGGGAAGTTAGC |
| E2F7 | hTFtarget | 1909 | 1924 | - | 15.6711 | 2.51E-06 | 0.00927 | GCCCCACCTCCTCCCA |
| E2F6 | hTFtarget | 1557 | 1572 | + | 15.9429 | 2.55E-06 | 0.0093 | TCCTCCCGCCTTGGCC |
| KDM1A | hTFtarget | 369 | 390 | - | 15.3944 | 2.57E-06 | 0.00227 | GTAGGAGCTGGAAGGGGAAGGA |
| POLR2A | hTFtarget | 763 | 784 | - | 14.9211 | 2.58E-06 | 0.00977 | GCTCACTGCAACCTCCGCCTCC |
| ZNF143 | hTFtarget | 730 | 749 | - | 15.2429 | 2.60E-06 | 0.00284 | TTCTTCTGCCTCAGCCTCAC |
| IRF5 | hTFtarget | 568 | 589 | - | 15.2597 | 2.61E-06 | 0.00502 | GGTGTGAGCTATCATGCCCTGC |
| MYH11 | hTFtarget | 766 | 781 | + | 15.4079 | 2.62E-06 | 0.0101 | GGCGGAGGTTGCAGTG |
| MAZ | hTFtarget | 1909 | 1924 | - | 15.8333 | 2.63E-06 | 0.00971 | GCCCCACCTCCTCCCA |
| ESRRA | database | 1251 | 1265 | + | 15.3945 | 2.64E-06 | 0.0104 | CCTTGGCCTTGAGGG |
| SP1 | hTFtarget | 1913 | 1924 | - | 15.8684 | 2.64E-06 | 0.01 | GCCCCACCTCCT |
| POLR2A | hTFtarget | 417 | 428 | - | 15.1447 | 2.65E-06 | 0.0101 | TAGAGGAAGTGA |
| SPI1 | hTFtarget | 1909 | 1924 | - | 15.7714 | 2.65E-06 | 0.00988 | GCCCCACCTCCTCCCA |
| REST | hTFtarget | 1568 | 1582 | + | 13.697 | 2.66E-06 | 0.0103 | TGGCCAAAGTGCTGG |
| NFYB | hTFtarget | 1385 | 1396 | + | 13.75 | 2.69E-06 | 0.00522 | ATATGGGTGGGA |
| ZNF263 | hTFtarget | 341 | 352 | - | 16.1286 | 2.69E-06 | 0.00518 | GGGAGGAGGAAC |
| CEBPB | hTFtarget | 786 | 801 | - | 15.5909 | 2.70E-06 | 0.0107 | GCAGTGGCGCAATCTT |
| AR | hTFtarget | 1461 | 1485 | + | 15.4507 | 2.71E-06 | 0.0107 | CATTGTCATCTAATGTGTTTATTTA |
| ESR1 | hTFtarget | 1810 | 1820 | - | 14.1642 | 2.72E-06 | 0.0103 | AGAGGAAGAGA |
| FLI1 | hTFtarget | 1109 | 1117 | + | 15.5921 | 2.72E-06 | 0.0103 | CACAGCAGG |
| FOXA2 | hTFtarget | 1109 | 1117 | + | 15.0132 | 2.72E-06 | 0.0102 | CACAGCAGG |
| FOXA2 | hTFtarget | 1109 | 1117 | + | 15.1711 | 2.72E-06 | 0.00952 | CACAGCAGG |
| BCL11A | hTFtarget | 1109 | 1117 | + | 15.5429 | 2.72E-06 | 0.0101 | CACAGCAGG |
| NANOG | hTFtarget | 1109 | 1117 | + | 15.3947 | 2.72E-06 | 0.0102 | CACAGCAGG |
| NANOG | hTFtarget | 1109 | 1117 | + | 15.4737 | 2.72E-06 | 0.01 | CACAGCAGG |
| NANOG | hTFtarget | 1109 | 1117 | + | 15.3684 | 2.72E-06 | 0.0101 | CACAGCAGG |
| NANOG | hTFtarget | 1109 | 1117 | + | 15.5658 | 2.72E-06 | 0.0101 | CACAGCAGG |
| NANOG | hTFtarget | 1109 | 1117 | + | 15.3158 | 2.72E-06 | 0.0102 | CACAGCAGG |
| NANOG | hTFtarget | 1109 | 1117 | + | 15.3947 | 2.72E-06 | 0.01 | CACAGCAGG |
| NANOG | hTFtarget | 1109 | 1117 | + | 15.2571 | 2.72E-06 | 0.0105 | CACAGCAGG |
| NANOG | hTFtarget | 1109 | 1117 | + | 15.5395 | 2.72E-06 | 0.00999 | CACAGCAGG |
| OTX2 | hTFtarget | 1109 | 1117 | + | 14.8684 | 2.72E-06 | 0.0105 | CACAGCAGG |
| OTX2 | hTFtarget | 1109 | 1117 | + | 15.7368 | 2.72E-06 | 0.01 | CACAGCAGG |
| OTX2 | hTFtarget | 1109 | 1117 | + | 15.8816 | 2.72E-06 | 0.00999 | CACAGCAGG |
| OTX2 | hTFtarget | 1109 | 1117 | + | 15.7632 | 2.72E-06 | 0.0101 | CACAGCAGG |
| PAX6 | hTFtarget | 1109 | 1117 | - | 15.4474 | 2.72E-06 | 0.0102 | CCTGCTGTG |
| SMAD3 | hTFtarget | 1109 | 1117 | + | 16.0658 | 2.72E-06 | 0.00934 | CACAGCAGG |
| SMAD3 | hTFtarget | 1109 | 1117 | + | 15.7429 | 2.72E-06 | 0.0102 | CACAGCAGG |
| SOX17 | hTFtarget | 1109 | 1117 | + | 16.0921 | 2.72E-06 | 0.0102 | CACAGCAGG |
| SOX2 | hTFtarget | 1109 | 1117 | - | 15.5789 | 2.72E-06 | 0.00977 | CCTGCTGTG |
| EOMES | hTFtarget | 1109 | 1117 | - | 15.1 | 2.72E-06 | 0.0102 | CCTGCTGTG |
| EOMES | hTFtarget | 1109 | 1117 | + | 15.25 | 2.72E-06 | 0.00947 | CACAGCAGG |
| EOMES | hTFtarget | 1109 | 1117 | + | 15.6447 | 2.72E-06 | 0.0104 | CACAGCAGG |
| EP300 | hTFtarget | 1109 | 1117 | + | 15.3289 | 2.72E-06 | 0.0103 | CACAGCAGG |
| SP7 | database | 1910 | 1929 | + | 15.3028 | 2.72E-06 | 0.00929 | GGGAGGAGGTGGGGCTGGTT |
| FOS | hTFtarget | 1913 | 1924 | - | 15.8816 | 2.73E-06 | 0.0104 | GCCCCACCTCCT |
| HNF1B | database | 1926 | 1939 | + | 14.9176 | 2.75E-06 | 0.00546 | GGTTAATGTTTGTC |
| HNF1B | database | 1926 | 1939 | - | 14.8824 | 2.75E-06 | 0.00546 | GACAAACATTAACC |
| CEBPB | hTFtarget | 786 | 801 | + | 15.197 | 2.76E-06 | 0.0109 | AAGATTGCGCCACTGC |
| SP3 | database | 1910 | 1929 | + | 15.3303 | 2.77E-06 | 0.00954 | GGGAGGAGGTGGGGCTGGTT |
| HNF1A | database | 1925 | 1942 | + | 14.4783 | 2.84E-06 | 0.0113 | TGGTTAATGTTTGTCTGG |
| NFYA | hTFtarget | 1913 | 1924 | + | 15.8158 | 2.86E-06 | 0.0109 | AGGAGGTGGGGC |
| SP1 | hTFtarget | 1906 | 1927 | + | 15.0758 | 2.86E-06 | 0.0105 | ATGTGGGAGGAGGTGGGGCTGG |
| SIX5 | hTFtarget | 1418 | 1438 | + | 14.3158 | 2.89E-06 | 0.0108 | GACCTCAGGTGCCAGCAGGCA |
| GTF2B | hTFtarget | 762 | 773 | - | 15.6711 | 2.90E-06 | 0.0109 | CCTCCGCCTCCC |
| REST | hTFtarget | 1564 | 1581 | + | 10.5 | 2.90E-06 | 0.0111 | GCCTTGGCCAAAGTGCTG |
| PRKDC | hTFtarget | 241 | 250 | - | 14.4857 | 2.92E-06 | 0.0116 | CTGTCAGTCA |
| RBCK1 | hTFtarget | 1913 | 1924 | - | 15.75 | 2.92E-06 | 0.011 | GCCCCACCTCCT |
| RBL2 | hTFtarget | 761 | 772 | + | 15.8684 | 2.93E-06 | 0.00717 | CGGGAGGCGGAG |
| TRIM24 | hTFtarget | 729 | 750 | + | 14.6447 | 2.94E-06 | 0.00321 | CGTGAGGCTGAGGCAGAAGAAT |
| IRF3 | hTFtarget | 1914 | 1925 | + | 15.5658 | 2.96E-06 | 0.0111 | GGAGGTGGGGCT |
| ZNF143 | hTFtarget | 1360 | 1380 | - | 14.6711 | 3.00E-06 | 0.00993 | GTACCAGGGTGCCCTCCGGCC |
| CREB1 | hTFtarget | 1964 | 1988 | - | 2.15152 | 3.03E-06 | 0.0104 | ACGAACCCAGGGCCAGAGCCAGAAA |
| FOS | hTFtarget | 1913 | 1924 | + | 15.6184 | 3.05E-06 | 0.0115 | AGGAGGTGGGGC |
| FOS | hTFtarget | 1913 | 1924 | + | 15.6316 | 3.07E-06 | 0.0115 | AGGAGGTGGGGC |
| SPI1 | hTFtarget | 762 | 777 | + | 15.4143 | 3.07E-06 | 0.0115 | GGGAGGCGGAGGTTGC |
| FOS | hTFtarget | 1913 | 1924 | + | 15.8158 | 3.08E-06 | 0.00701 | AGGAGGTGGGGC |
| T | hTFtarget | 1109 | 1120 | - | 15.1286 | 3.10E-06 | 0.0068 | GACCCTGCTGTG |
| NCOR2 | hTFtarget | 1910 | 1921 | - | 15.0921 | 3.14E-06 | 0.0118 | CCACCTCCTCCC |
| TFAP2D | database | 610 | 623 | - | 15.5102 | 3.16E-06 | 0.0103 | GCCCGCCTCAGCCT |
| POLR2A | hTFtarget | 608 | 623 | + | 15.3289 | 3.18E-06 | 0.00895 | GGAGGCTGAGGCGGGC |
| TFAP2D | database | 610 | 623 | + | 15.4146 | 3.20E-06 | 0.0106 | AGGCTGAGGCGGGC |
| SPI1 | hTFtarget | 1913 | 1924 | + | 15.5571 | 3.20E-06 | 0.0121 | AGGAGGTGGGGC |
| TP53 | hTFtarget | 1602 | 1617 | + | 14.6847 | 3.20E-06 | 0.0126 | CATGCCCGGCCCTGTC |
| TRIM24 | hTFtarget | 588 | 603 | + | 15.2439 | 3.20E-06 | 0.0041 | CCTGTAATCCCAGTGC |
| RB1 | hTFtarget | 1557 | 1572 | - | 15.2571 | 3.21E-06 | 0.0111 | GGCCAAGGCGGGAGGA |
| SALL4 | hTFtarget | 1109 | 1119 | + | 14.9605 | 3.21E-06 | 0.0121 | CACAGCAGGGT |
| IRF5 | hTFtarget | 93 | 104 | - | 15.2237 | 3.23E-06 | 0.0032 | GCTGAGAGTACA |
| SPI1 | hTFtarget | 415 | 426 | - | 15.6818 | 3.23E-06 | 0.0125 | GAGGAAGTGAGG |
| TAL1 | hTFtarget | 1567 | 1582 | + | 9.84211 | 3.26E-06 | 0.0124 | TTGGCCAAAGTGCTGG |
| AR | hTFtarget | 334 | 345 | + | 13.8 | 3.27E-06 | 0.0128 | TCACACTGTTCC |
| SPI1 | hTFtarget | 1913 | 1924 | - | 15.5132 | 3.28E-06 | 0.0126 | GCCCCACCTCCT |
| LMO2 | database | 197 | 205 | - | 12.6633 | 3.31E-06 | 0.0132 | CAGATAGGG |
| RELA | hTFtarget | 1320 | 1335 | + | 15.1974 | 3.33E-06 | 0.0114 | GTCCATCCCCAGCCAC |
| SP2 | hTFtarget | 686 | 701 | - | 14.7778 | 3.34E-06 | 0.0131 | AATTTTTGTATTTTTA |
| POLR2A | hTFtarget | 608 | 622 | + | 15 | 3.35E-06 | 0.0131 | GGAGGCTGAGGCGGG |
| RARA | hTFtarget | 1908 | 1921 | + | 14.9 | 3.40E-06 | 0.0129 | GTGGGAGGAGGTGG |
| GTF3C2 | hTFtarget | 421 | 436 | - | 15.4211 | 3.41E-06 | 0.0066 | AGGCTTCCTAGAGGAA |
| LMNB1 | hTFtarget | 763 | 778 | - | 13.3171 | 3.43E-06 | 0.0032 | TGCAACCTCCGCCTCC |
| MYC | hTFtarget | 396 | 410 | + | 14.9091 | 3.45E-06 | 0.0134 | TTTTACTTCTCCACT |
| E2F3 | database | 1559 | 1573 | + | 15.7586 | 3.46E-06 | 0.0123 | CTCCCGCCTTGGCCA |
| KLF5 | hTFtarget | 1913 | 1924 | + | 15.4605 | 3.46E-06 | 0.013 | AGGAGGTGGGGC |
| CREB1 | hTFtarget | 1810 | 1821 | + | 14.988 | 3.47E-06 | 0.00673 | TCTCTTCCTCTG |
| EWSR1 | hTFtarget | 1030 | 1054 | + | -3.48485 | 3.48E-06 | 0.0125 | TGGAGTGAAGAACAGAAGGCAGGGG |
| NFYA | hTFtarget | 1914 | 1925 | - | 15.3026 | 3.48E-06 | 0.0129 | AGCCCCACCTCC |
| SP1 | hTFtarget | 1913 | 1924 | + | 15.2714 | 3.50E-06 | 0.0134 | AGGAGGTGGGGC |
| NR5A2 | database | 1254 | 1263 | - | 14.3596 | 3.51E-06 | 0.0135 | CTCAAGGCCA |
| NR5A2 | database | 1254 | 1263 | + | 14.3367 | 3.51E-06 | 0.0135 | TGGCCTTGAG |
| THRB | database | 623 | 639 | + | 15.1778 | 3.53E-06 | 0.0136 | CAGATCACTTGAGGTCA |
| RELA | hTFtarget | 415 | 426 | + | 14.8052 | 3.56E-06 | 0.014 | CCTCACTTCCTC |
| FOXA1 | hTFtarget | 1474 | 1485 | - | 14.4805 | 3.58E-06 | 0.0142 | TAAATAAACACA |
| SPI1 | hTFtarget | 1985 | 2000 | - | 15.25 | 3.58E-06 | 0.0133 | AGGGGAGGGACAACGA |
| ZNF263 | hTFtarget | 341 | 352 | + | 15.5909 | 3.58E-06 | 0.0134 | GTTCCTCCTCCC |
| FOXJ3 | database | 1925 | 1937 | + | 16 | 3.61E-06 | 0.0144 | TGGTTAATGTTTG |
| FOXJ2 | database | 1476 | 1485 | + | 14.8913 | 3.64E-06 | 0.0145 | TGTTTATTTA |
| TCF12 | hTFtarget | 1108 | 1119 | - | 15.0921 | 3.65E-06 | 0.0107 | ACCCTGCTGTGT |
| T | hTFtarget | 99 | 110 | - | 15.0143 | 3.66E-06 | 0.0068 | CTTCCCGCTGAG |
| SPI1 | hTFtarget | 1911 | 1926 | + | 15.3286 | 3.68E-06 | 0.0138 | GGAGGAGGTGGGGCTG |
| TAF1 | hTFtarget | 764 | 779 | + | 14.6053 | 3.68E-06 | 0.0132 | GAGGCGGAGGTTGCAG |
| RXRG | hTFtarget | 417 | 427 | - | 14.6184 | 3.70E-06 | 0.0143 | AGAGGAAGTGA |
| FOS | hTFtarget | 762 | 773 | + | 15.3421 | 3.73E-06 | 0.00701 | GGGAGGCGGAGG |
| E2F6 | database | 1557 | 1567 | - | 15.5 | 3.74E-06 | 0.0143 | AGGCGGGAGGA |
| SP2 | hTFtarget | 1913 | 1926 | - | 15.2714 | 3.76E-06 | 0.0144 | CAGCCCCACCTCCT |
| MYPOP | database | 788 | 797 | + | 14.3061 | 3.76E-06 | 0.0143 | GATTGCGCCA |
| RBL2 | hTFtarget | 1912 | 1923 | + | 15.5132 | 3.80E-06 | 0.00717 | GAGGAGGTGGGG |
| MTF1 | database | 897 | 910 | + | 15.2844 | 3.81E-06 | 0.014 | CCTGCACCCAGCAC |
| ZNF274 | hTFtarget | 406 | 421 | + | 14.7606 | 3.85E-06 | 0.0148 | CCACTCAAACCTCACT |
| MYB | hTFtarget | 1910 | 1921 | - | 14.9079 | 3.86E-06 | 0.0148 | CCACCTCCTCCC |
| FLI1 | database | 1807 | 1823 | - | 14.2111 | 3.88E-06 | 0.00715 | CCCAGAGGAAGAGAGGC |
| FLI1 | database | 1807 | 1823 | - | 14.2222 | 3.89E-06 | 0.00717 | CCCAGAGGAAGAGAGGC |
| SIX5 | hTFtarget | 653 | 673 | + | 14.8182 | 3.93E-06 | 0.0154 | AGCCTGGCCAACGTGGTGAAA |
| ETV5 | hTFtarget | 416 | 427 | + | 14.2143 | 3.94E-06 | 0.0153 | CTCACTTCCTCT |
| SPI1 | hTFtarget | 1913 | 1928 | + | 15.1429 | 3.94E-06 | 0.0148 | AGGAGGTGGGGCTGGT |
| SPI1 | hTFtarget | 1907 | 1928 | - | 14.7429 | 3.94E-06 | 0.0145 | ACCAGCCCCACCTCCTCCCACA |
| USF2 | hTFtarget | 762 | 773 | + | 15.2857 | 3.94E-06 | 0.0147 | GGGAGGCGGAGG |
| REST | hTFtarget | 656 | 671 | + | 11.7879 | 3.95E-06 | 0.0119 | CTGGCCAACGTGGTGA |
| ERG | hTFtarget | 1032 | 1056 | - | -9.81579 | 3.95E-06 | 0.0126 | GCCCCCTGCCTTCTGTTCTTCACTC |
| ETS1 | hTFtarget | 889 | 904 | + | 14.8571 | 4.00E-06 | 0.0149 | CTTTGCCACCTGCACC |
| HNF1B | hTFtarget | 1925 | 1942 | + | 14.9722 | 4.00E-06 | 0.0131 | TGGTTAATGTTTGTCTGG |
| POLR2A | hTFtarget | 764 | 779 | - | 14.3158 | 4.00E-06 | 0.0153 | CTGCAACCTCCGCCTC |
| FOXA1 | hTFtarget | 335 | 346 | + | 13.6429 | 4.01E-06 | 0.0156 | CACACTGTTCCT |
| ZNF384 | database | 1447 | 1455 | - | 12.5217 | 4.03E-06 | 0.0161 | GAAAAAGCC |
| HOXA9 | hTFtarget | 419 | 427 | + | 14.5263 | 4.03E-06 | 0.0157 | ACTTCCTCT |
| TCF7L2 | hTFtarget | 419 | 427 | - | 13.2714 | 4.03E-06 | 0.0157 | AGAGGAAGT |
| TFAP4 | hTFtarget | 419 | 427 | + | 13.4857 | 4.03E-06 | 0.0158 | ACTTCCTCT |
| RXRA | hTFtarget | 546 | 561 | - | 14.7143 | 4.04E-06 | 0.0151 | TCTGGAGGAGAGGGGA |
| STAT3 | hTFtarget | 1404 | 1415 | - | 14.9429 | 4.04E-06 | 0.0151 | GGTGGGAGCTGG |
| GTF2I | hTFtarget | 607 | 615 | - | 14.9286 | 4.06E-06 | 0.00735 | CAGCCTCCC |
| NFYA | hTFtarget | 240 | 251 | + | 15 | 4.06E-06 | 0.0156 | CTGACTGACAGT |
| SPI1 | hTFtarget | 1910 | 1930 | - | 15.0789 | 4.06E-06 | 0.012 | TAACCAGCCCCACCTCCTCCC |
| KDM1A | hTFtarget | 679 | 701 | - | 14.4211 | 4.08E-06 | 0.0161 | AATTTTTGTATTTTTAGTAGAGA |
| SPI1 | hTFtarget | 415 | 430 | + | 14.8788 | 4.08E-06 | 0.0157 | CCTCACTTCCTCTAGG |
| USF2 | hTFtarget | 61 | 72 | - | 14.5663 | 4.08E-06 | 0.0154 | ACTACCGTTTCC |
| SPI1 | hTFtarget | 1913 | 1924 | + | 15.1842 | 4.10E-06 | 0.0155 | AGGAGGTGGGGC |
| FOXO3 | hTFtarget | 1903 | 1927 | - | 3.42105 | 4.12E-06 | 0.0162 | CCAGCCCCACCTCCTCCCACATACA |
| SPI1 | hTFtarget | 1909 | 1929 | - | 14.9 | 4.14E-06 | 0.0152 | AACCAGCCCCACCTCCTCCCA |
| GATA1 | hTFtarget | 416 | 427 | - | 14.6842 | 4.15E-06 | 0.016 | AGAGGAAGTGAG |
| HIC1 | database | 1363 | 1377 | - | 13.7368 | 4.16E-06 | 0.0149 | CCAGGGTGCCCTCCG |
| SPI1 | hTFtarget | 1913 | 1924 | - | 15.0571 | 4.17E-06 | 0.0161 | GCCCCACCTCCT |
| PBX3 | hTFtarget | 1913 | 1924 | + | 15.1286 | 4.19E-06 | 0.0158 | AGGAGGTGGGGC |
| YY1 | hTFtarget | 766 | 781 | + | 14.6184 | 4.19E-06 | 0.0154 | GGCGGAGGTTGCAGTG |
| HIF1A | database | 905 | 916 | - | 14.4286 | 4.23E-06 | 0.0151 | GGCTACGTGCTG |
| REST | hTFtarget | 1567 | 1582 | + | 11.1212 | 4.25E-06 | 0.0164 | TTGGCCAAAGTGCTGG |
| FOXP2 | database | 1188 | 1198 | - | 14.9242 | 4.27E-06 | 0.017 | AGGTAAACAGA |
| SPI1 | hTFtarget | 1911 | 1926 | - | 15.1 | 4.27E-06 | 0.0147 | CAGCCCCACCTCCTCC |
| HIF1A | database | 905 | 916 | - | 14.4848 | 4.29E-06 | 0.0158 | GGCTACGTGCTG |
| HNF4A | hTFtarget | 1711 | 1722 | - | 14.3571 | 4.29E-06 | 0.0165 | CCCTGGCCTTAG |
| RUNX1 | hTFtarget | 1810 | 1821 | - | 15.0658 | 4.29E-06 | 0.00667 | CAGAGGAAGAGA |
| SP2 | hTFtarget | 1913 | 1926 | - | 15.2571 | 4.31E-06 | 0.0161 | CAGCCCCACCTCCT |
| TRIM28 | hTFtarget | 1236 | 1247 | + | 15.4868 | 4.31E-06 | 0.0171 | TTTGCAGTTCAA |
| ETS1 | hTFtarget | 59 | 74 | + | 14.5263 | 4.33E-06 | 0.0162 | CGGGAAACGGTAGTCC |
| CEBPB | hTFtarget | 788 | 799 | + | 14.8939 | 4.44E-06 | 0.0177 | GATTGCGCCACT |
| SMAD3 | hTFtarget | 99 | 110 | - | 14.0571 | 4.46E-06 | 0.0166 | CTTCCCGCTGAG |
| SPI1 | hTFtarget | 758 | 779 | + | 14.8286 | 4.46E-06 | 0.0165 | ACCCGGGAGGCGGAGGTTGCAG |
| E2F7 | hTFtarget | 1912 | 1923 | - | 15.2368 | 4.46E-06 | 0.0169 | CCCCACCTCCTC |
| YY1 | hTFtarget | 764 | 779 | - | 13.5526 | 4.47E-06 | 0.0153 | CTGCAACCTCCGCCTC |
| E2F7 | hTFtarget | 1474 | 1485 | - | 14.026 | 4.47E-06 | 0.0178 | TAAATAAACACA |
| SPI1 | hTFtarget | 1913 | 1928 | + | 14.9571 | 4.50E-06 | 0.0167 | AGGAGGTGGGGCTGGT |
| CEBPA | hTFtarget | 417 | 428 | - | 14.0455 | 4.50E-06 | 0.0173 | TAGAGGAAGTGA |
| REST | hTFtarget | 1567 | 1582 | + | 10.2727 | 4.51E-06 | 0.0176 | TTGGCCAAAGTGCTGG |
| TP53 | hTFtarget | 1602 | 1617 | + | 14.0303 | 4.52E-06 | 0.0179 | CATGCCCGGCCCTGTC |
| AR | hTFtarget | 335 | 346 | - | 13.9211 | 4.54E-06 | 0.0177 | AGGAACAGTGTG |
| TCF3 | hTFtarget | 417 | 428 | + | 13.8571 | 4.55E-06 | 0.0179 | TCACTTCCTCTA |
| YY1 | hTFtarget | 764 | 779 | + | 14.5132 | 4.57E-06 | 0.0161 | GAGGCGGAGGTTGCAG |
| NFYA | hTFtarget | 1913 | 1924 | + | 15.1 | 4.63E-06 | 0.0173 | AGGAGGTGGGGC |
| PCGF2 | hTFtarget | 329 | 350 | + | 14.6053 | 4.63E-06 | 0.0159 | TTCACTCACACTGTTCCTCCTC |
| HNF1A | database | 1926 | 1940 | + | 14.8444 | 4.64E-06 | 0.0184 | GGTTAATGTTTGTCT |
| SMAD1 | database | 1676 | 1687 | + | 14.7387 | 4.68E-06 | 0.0178 | TCCCTCTCTGCA |
| IRF4 | hTFtarget | 411 | 427 | - | 14.8714 | 4.69E-06 | 0.0184 | AGAGGAAGTGAGGTTTG |
| CDK8 | hTFtarget | 1903 | 1927 | - | 14.4935 | 4.69E-06 | 0.0151 | CCAGCCCCACCTCCTCCCACATACA |
| REST | hTFtarget | 1567 | 1582 | + | 11.0758 | 4.71E-06 | 0.018 | TTGGCCAAAGTGCTGG |
| SPI1 | hTFtarget | 371 | 382 | + | 14.3143 | 4.73E-06 | 0.0183 | CTTCCCCTTCCA |
| SMAD1 | database | 1676 | 1687 | + | 14.7374 | 4.73E-06 | 0.018 | TCCCTCTCTGCA |
| SPI1 | hTFtarget | 1913 | 1924 | + | 15 | 4.74E-06 | 0.0178 | AGGAGGTGGGGC |
| TEAD4 | hTFtarget | 350 | 361 | - | 14.6286 | 4.74E-06 | 0.0189 | AGCATTCCAGGG |
| EP300 | hTFtarget | 1188 | 1199 | - | 14.0909 | 4.75E-06 | 0.0189 | AAGGTAAACAGA |
| CLOCK | hTFtarget | 1914 | 1925 | - | 15.1447 | 4.77E-06 | 0.0179 | AGCCCCACCTCC |
| T | hTFtarget | 1108 | 1119 | + | 14.9571 | 4.78E-06 | 0.0117 | ACACAGCAGGGT |
| SPI1 | hTFtarget | 1912 | 1926 | + | 15.0395 | 4.79E-06 | 0.0181 | GAGGAGGTGGGGCTG |
| PPARG | hTFtarget | 546 | 561 | - | 14.5455 | 4.80E-06 | 0.018 | TCTGGAGGAGAGGGGA |
| REST | hTFtarget | 1567 | 1582 | + | 8.77273 | 4.81E-06 | 0.0184 | TTGGCCAAAGTGCTGG |
| SPI1 | hTFtarget | 1913 | 1928 | - | 14.9474 | 4.83E-06 | 0.0182 | ACCAGCCCCACCTCCT |
| POLR2A | hTFtarget | 609 | 620 | + | 14.9211 | 4.84E-06 | 0.019 | GAGGCTGAGGCG |
| ASCL1 | hTFtarget | 1911 | 1922 | + | 14.5634 | 4.87E-06 | 0.00952 | GGAGGAGGTGGG |
| SPI1 | hTFtarget | 1913 | 1928 | + | 14.7714 | 4.87E-06 | 0.00949 | AGGAGGTGGGGCTGGT |
| REST | hTFtarget | 656 | 671 | + | 10.1 | 4.88E-06 | 0.0101 | CTGGCCAACGTGGTGA |
| SRF | hTFtarget | 342 | 353 | - | 14.6447 | 4.88E-06 | 0.0104 | AGGGAGGAGGAA |
| STAT1 | hTFtarget | 338 | 353 | - | 13.1053 | 4.88E-06 | 0.0187 | AGGGAGGAGGAACAGT |
| SP1 | database | 1914 | 1924 | - | 15.0962 | 4.90E-06 | 0.012 | GCCCCACCTCC |
| IRF3 | hTFtarget | 1913 | 1924 | + | 15.0921 | 4.92E-06 | 0.0185 | AGGAGGTGGGGC |
| NFYA | hTFtarget | 1913 | 1924 | + | 15.1184 | 4.92E-06 | 0.0183 | AGGAGGTGGGGC |
| BARX2 | hTFtarget | 1913 | 1924 | + | 14.9286 | 4.93E-06 | 0.0181 | AGGAGGTGGGGC |
| PPARG | hTFtarget | 546 | 561 | - | 14.4848 | 4.93E-06 | 0.0185 | TCTGGAGGAGAGGGGA |
| E2F1 | hTFtarget | 1557 | 1572 | - | 14.5303 | 4.93E-06 | 0.0171 | GGCCAAGGCGGGAGGA |
| ZNF524 | database | 753 | 766 | - | 15.0102 | 4.94E-06 | 0.0189 | CTCCCGGGTTCAAG |
| GATA4 | hTFtarget | 1109 | 1117 | + | 14.8026 | 4.95E-06 | 0.0186 | CACAGCAGG |
| KLF4 | hTFtarget | 1790 | 1798 | - | 14.7143 | 4.95E-06 | 0.0191 | CACCCACCC |
| NANOG | hTFtarget | 1109 | 1117 | + | 14.9429 | 4.95E-06 | 0.0176 | CACAGCAGG |
| NANOG | hTFtarget | 1109 | 1117 | + | 14.9474 | 4.95E-06 | 0.0182 | CACAGCAGG |
| SOX2 | hTFtarget | 1109 | 1117 | + | 15.1974 | 4.95E-06 | 0.0176 | CACAGCAGG |
| SOX2 | hTFtarget | 1109 | 1117 | + | 15.0526 | 4.95E-06 | 0.0179 | CACAGCAGG |
| SOX2 | hTFtarget | 1109 | 1117 | - | 15.1579 | 4.95E-06 | 0.0177 | CCTGCTGTG |
| TRIM28 | hTFtarget | 365 | 382 | + | 14.1974 | 4.95E-06 | 0.0196 | CCGGTCCTTCCCCTTCCA |
| UBTF | hTFtarget | 343 | 351 | - | 13.5139 | 4.95E-06 | 0.0178 | GGAGGAGGA |
| RXRB | database | 632 | 641 | + | 14.2308 | 4.96E-06 | 0.0193 | TGAGGTCAGG |
| RXRB | database | 632 | 641 | - | 14.24 | 4.96E-06 | 0.0192 | CCTGACCTCA |
| ASCL1 | hTFtarget | 379 | 390 | - | 14.5352 | 4.98E-06 | 0.00952 | GTAGGAGCTGGA |
| BRD4 | hTFtarget | 451 | 472 | - | 14.7692 | 5.00E-06 | 0.0198 | AAGGGAATGATGAGAATAAACT |
| TAF1 | hTFtarget | 1063 | 1086 | - | 14.6184 | 5.01E-06 | 0.00885 | GAGAAACAAGGGAAGTTAGCAGAG |
| ZBTB17 | hTFtarget | 1244 | 1259 | + | 14.5181 | 5.01E-06 | 0.0192 | TCAACTGCCTTGGCCT |
| ELK3 | hTFtarget | 1914 | 1929 | + | 14.75 | 5.01E-06 | 0.0188 | GGAGGTGGGGCTGGTT |
| AR | hTFtarget | 335 | 345 | - | 13.4714 | 5.02E-06 | 0.0191 | GGAACAGTGTG |
| SPI1 | hTFtarget | 762 | 777 | + | 14.7286 | 5.03E-06 | 0.00949 | GGGAGGCGGAGGTTGC |
| SP1 | hTFtarget | 1913 | 1924 | + | 14.9737 | 5.06E-06 | 0.0191 | AGGAGGTGGGGC |
| SPI1 | hTFtarget | 758 | 782 | - | 14.3571 | 5.07E-06 | 0.0186 | TCACTGCAACCTCCGCCTCCCGGGT |
| FOXF1 | database | 1475 | 1485 | + | 14.8378 | 5.09E-06 | 0.0203 | GTGTTTATTTA |
| PRKDC | hTFtarget | 1913 | 1928 | - | 14.8421 | 5.14E-06 | 0.019 | ACCAGCCCCACCTCCT |
| HNF4A | hTFtarget | 1568 | 1583 | + | 14.4919 | 5.15E-06 | 0.0197 | TGGCCAAAGTGCTGGG |
| SPI1 | hTFtarget | 414 | 425 | + | 14.8158 | 5.15E-06 | 0.0204 | ACCTCACTTCCT |
| POLR2A | hTFtarget | 764 | 779 | - | 14.2763 | 5.17E-06 | 0.0193 | CTGCAACCTCCGCCTC |
| REST | hTFtarget | 1567 | 1582 | + | 9.92857 | 5.19E-06 | 0.0101 | TTGGCCAAAGTGCTGG |
| SPI1 | hTFtarget | 1912 | 1927 | + | 14.3714 | 5.19E-06 | 0.0197 | GAGGAGGTGGGGCTGG |
| TFAP2C | hTFtarget | 1358 | 1373 | + | 14.6515 | 5.20E-06 | 0.0112 | GTGGCCGGAGGGCACC |
| TRIM28 | hTFtarget | 1049 | 1064 | - | 14.3614 | 5.20E-06 | 0.0107 | AGAAACTGGCCCCCTG |
| BRD4 | hTFtarget | 1908 | 1923 | - | 14.3158 | 5.21E-06 | 0.0179 | CCCCACCTCCTCCCAC |
| EP300 | hTFtarget | 1702 | 1723 | - | 4.77632 | 5.21E-06 | 0.0197 | GCCCTGGCCTTAGGCAGATCCA |
| RUNX1 | hTFtarget | 1335 | 1346 | + | 14.9737 | 5.24E-06 | 0.0202 | CTCAGGATGTGG |
| MYB | hTFtarget | 1910 | 1921 | - | 14.7368 | 5.25E-06 | 0.0201 | CCACCTCCTCCC |
| REST | hTFtarget | 1567 | 1582 | + | 8.71212 | 5.26E-06 | 0.0203 | TTGGCCAAAGTGCTGG |
| POLR2A | hTFtarget | 1910 | 1921 | + | 14.6053 | 5.27E-06 | 0.0101 | GGGAGGAGGTGG |
| RUNX1 | hTFtarget | 417 | 428 | - | 14.8553 | 5.29E-06 | 0.00667 | TAGAGGAAGTGA |
| MYC | hTFtarget | 1654 | 1665 | + | 14.8026 | 5.32E-06 | 0.0205 | CAGGATGGCAGC |
| FOXP1 | hTFtarget | 1476 | 1487 | + | 13.4328 | 5.36E-06 | 0.0213 | TGTTTATTTATT |
| RUNX1 | hTFtarget | 1910 | 1921 | + | 14.6711 | 5.38E-06 | 0.0205 | GGGAGGAGGTGG |
| SPI1 | hTFtarget | 1913 | 1928 | - | 14.9868 | 5.38E-06 | 0.0189 | ACCAGCCCCACCTCCT |
| REST | hTFtarget | 1567 | 1582 | + | 7 | 5.40E-06 | 0.0207 | TTGGCCAAAGTGCTGG |
| TCF3 | hTFtarget | 415 | 428 | - | 14.2763 | 5.41E-06 | 0.021 | TAGAGGAAGTGAGG |
| E2F6 | hTFtarget | 1558 | 1569 | - | 14.9143 | 5.41E-06 | 0.0201 | CAAGGCGGGAGG |
| SMAD4 | hTFtarget | 608 | 623 | + | 14 | 5.42E-06 | 0.0164 | GGAGGCTGAGGCGGGC |
| EOMES | hTFtarget | 879 | 899 | - | 14.303 | 5.42E-06 | 0.0213 | AGGTGGCAAAGGAGGTGAAAA |
| MXI1 | hTFtarget | 1914 | 1925 | - | 14.6053 | 5.43E-06 | 0.0205 | AGCCCCACCTCC |
| RARA | hTFtarget | 633 | 641 | + | 12.8636 | 5.43E-06 | 0.0208 | GAGGTCAGG |
| SMAD2/SMAD3 | hTFtarget | 1109 | 1117 | + | 15.5 | 5.43E-06 | 0.0208 | CACAGCAGG |
| SMAD3 | hTFtarget | 1109 | 1117 | - | 15.5263 | 5.43E-06 | 0.021 | CCTGCTGTG |
| SMARCA4 | hTFtarget | 1109 | 1117 | - | 14.9868 | 5.43E-06 | 0.0207 | CCTGCTGTG |
| SPI1 | hTFtarget | 762 | 777 | - | 14.8143 | 5.43E-06 | 0.0205 | GCAACCTCCGCCTCCC |
| EOMES | hTFtarget | 1109 | 1117 | + | 15.5789 | 5.43E-06 | 0.0212 | CACAGCAGG |
| NANOG | hTFtarget | 99 | 110 | + | 14.3286 | 5.44E-06 | 0.0135 | CTCAGCGGGAAG |
| BRD4 | hTFtarget | 1911 | 1922 | - | 14.8421 | 5.46E-06 | 0.0206 | CCCACCTCCTCC |
| SP2 | hTFtarget | 1914 | 1925 | + | 14.9079 | 5.46E-06 | 0.0199 | GGAGGTGGGGCT |
| SPI1 | hTFtarget | 1909 | 1924 | - | 14.7237 | 5.49E-06 | 0.0212 | GCCCCACCTCCTCCCA |
| SPIB | hTFtarget | 336 | 351 | + | 14.5132 | 5.50E-06 | 0.0212 | ACACTGTTCCTCCTCC |
| ICE2 | hTFtarget | 1654 | 1665 | + | 14.7895 | 5.52E-06 | 0.0217 | CAGGATGGCAGC |
| ZFP42 | hTFtarget | 1914 | 1924 | - | 14.4474 | 5.53E-06 | 0.0208 | GCCCCACCTCC |
| GATA1 | hTFtarget | 270 | 291 | - | 12.3976 | 5.54E-06 | 0.0217 | CAGTAAGGAGGCAGGACTGTGT |
| FOXF1 | database | 1475 | 1485 | - | 14.88 | 5.54E-06 | 0.0221 | TAAATAAACAC |
| GATA6 | hTFtarget | 1188 | 1199 | - | 14.4156 | 5.55E-06 | 0.0221 | AAGGTAAACAGA |
| ZNF143 | hTFtarget | 1418 | 1438 | - | 10.3182 | 5.55E-06 | 0.021 | TGCCTGCTGGCACCTGAGGTC |
| ELL2 | hTFtarget | 1654 | 1665 | - | 14.7632 | 5.55E-06 | 0.022 | GCTGCCATCCTG |
| REST | hTFtarget | 1567 | 1582 | + | 11.1667 | 5.56E-06 | 0.0167 | TTGGCCAAAGTGCTGG |
| VEZF1 | hTFtarget | 1991 | 1999 | + | 14.9868 | 5.57E-06 | 0.0208 | TCCCTCCCC |
| STAT1 | hTFtarget | 341 | 352 | + | 14.5 | 5.58E-06 | 0.0205 | GTTCCTCCTCCC |
| ZBTB17 | hTFtarget | 178 | 193 | - | 13.1714 | 5.59E-06 | 0.0218 | CCTTTAGTTGTGCCTG |
| EP300 | hTFtarget | 1702 | 1723 | - | 12.2105 | 5.59E-06 | 0.0193 | GCCCTGGCCTTAGGCAGATCCA |
| TRIM28 | hTFtarget | 995 | 1010 | + | 14.241 | 5.61E-06 | 0.0107 | AGGCCCTGGCTCCCTT |
| POLR2A | hTFtarget | 763 | 778 | + | 14.4079 | 5.62E-06 | 0.00895 | GGAGGCGGAGGTTGCA |
| REST | hTFtarget | 1568 | 1580 | + | 12.9242 | 5.63E-06 | 0.0221 | TGGCCAAAGTGCT |
| SRF | hTFtarget | 1453 | 1464 | - | 14.5395 | 5.63E-06 | 0.0104 | AATGGGGAGGAA |
| EZH2 | hTFtarget | 1977 | 1998 | + | 14.4545 | 5.65E-06 | 0.0202 | CCCTGGGTTCGTTGTCCCTCCC |
| SETDB1 | hTFtarget | 1391 | 1402 | - | 14.6711 | 5.65E-06 | 0.0217 | AGTGCTTCCCAC |
| REST | hTFtarget | 1567 | 1582 | + | 8.27273 | 5.66E-06 | 0.0218 | TTGGCCAAAGTGCTGG |
| EP300 | hTFtarget | 766 | 781 | + | 0.428571 | 5.66E-06 | 0.0202 | GGCGGAGGTTGCAGTG |
| SNAI1 | database | 893 | 906 | + | 14.7339 | 5.67E-06 | 0.0218 | GCCACCTGCACCCA |
| ETS1 | hTFtarget | 1361 | 1379 | + | 13.8902 | 5.69E-06 | 0.0215 | GCCGGAGGGCACCCTGGTA |
| REST | hTFtarget | 1568 | 1580 | + | 12.8333 | 5.69E-06 | 0.022 | TGGCCAAAGTGCT |
| SPIB | hTFtarget | 415 | 430 | + | 14.4312 | 5.69E-06 | 0.0217 | CCTCACTTCCTCTAGG |
| TFAP2C | hTFtarget | 1707 | 1720 | - | 14.4697 | 5.69E-06 | 0.0157 | CTGGCCTTAGGCAG |
| SP2 | hTFtarget | 1913 | 1924 | + | 14.9342 | 5.70E-06 | 0.0212 | AGGAGGTGGGGC |
| ENO1 | database | 658 | 670 | - | 13.7111 | 5.71E-06 | 0.0222 | CACCACGTTGGCC |
| THRA | database | 631 | 640 | + | 14.0482 | 5.71E-06 | 0.0219 | TTGAGGTCAG |
| AR | hTFtarget | 1474 | 1495 | - | 14.3582 | 5.71E-06 | 0.0226 | AAAGTATAAATAAATAAACACA |
| TCF12 | hTFtarget | 98 | 109 | - | 14.6447 | 5.73E-06 | 0.0107 | TTCCCGCTGAGA |
| CEBPA | hTFtarget | 786 | 801 | + | 14.5 | 5.74E-06 | 0.0228 | AAGATTGCGCCACTGC |
| SPI1 | hTFtarget | 1913 | 1924 | + | 14.7286 | 5.75E-06 | 0.0218 | AGGAGGTGGGGC |
| OTX2 | database | 1576 | 1590 | + | 14.0549 | 5.77E-06 | 0.0223 | GTGCTGGGATTACAG |
| TFAP2C | hTFtarget | 1360 | 1371 | - | 14.4091 | 5.77E-06 | 0.0215 | TGCCCTCCGGCC |
| CBFB | hTFtarget | 1910 | 1921 | - | 14.7105 | 5.79E-06 | 0.0216 | CCACCTCCTCCC |
| ENO1 | database | 658 | 670 | + | 13.6667 | 5.79E-06 | 0.022 | GGCCAACGTGGTG |
| OTX2 | database | 1576 | 1590 | - | 14.05 | 5.79E-06 | 0.0223 | CTGTAATCCCAGCAC |
| SPI1 | hTFtarget | 1913 | 1928 | - | 14.5857 | 5.80E-06 | 0.0217 | ACCAGCCCCACCTCCT |
| TFAP2C | hTFtarget | 1706 | 1721 | - | 14.4697 | 5.81E-06 | 0.0218 | CCTGGCCTTAGGCAGA |
| TFAP2C | hTFtarget | 1358 | 1373 | - | 14.6212 | 5.82E-06 | 0.0111 | GGTGCCCTCCGGCCAC |
| HNF1A | database | 1926 | 1936 | + | 13.8182 | 5.83E-06 | 0.0232 | GGTTAATGTTT |
| IRF1 | hTFtarget | 366 | 387 | - | 14.2571 | 5.84E-06 | 0.0223 | GGAGCTGGAAGGGGAAGGACCG |
| E2F6 | hTFtarget | 1558 | 1568 | - | 15 | 5.84E-06 | 0.0224 | AAGGCGGGAGG |
| AR | hTFtarget | 1188 | 1199 | + | 13.6104 | 5.87E-06 | 0.0233 | TCTGTTTACCTT |
| CHD1 | hTFtarget | 611 | 626 | + | 14.3553 | 5.88E-06 | 0.0195 | GGCTGAGGCGGGCAGA |
| VEZF1 | hTFtarget | 118 | 139 | + | 13.8429 | 5.89E-06 | 0.0137 | TTCAGCCTGTCCCCCACCCACC |
| FOXF2 | database | 1190 | 1200 | + | 14.6739 | 5.90E-06 | 0.0235 | TGTTTACCTTA |
| POLR3A | hTFtarget | 707 | 723 | + | 14.0857 | 5.90E-06 | 0.00769 | GGCGCCTGTAATCCCAG |
| SP2 | hTFtarget | 241 | 252 | - | 14.3947 | 5.90E-06 | 0.0233 | AACTGTCAGTCA |
| SPI1 | hTFtarget | 1913 | 1928 | - | 14.6286 | 5.90E-06 | 0.0185 | ACCAGCCCCACCTCCT |
| FOXF2 | database | 1190 | 1200 | - | 14.6535 | 5.90E-06 | 0.0235 | TAAGGTAAACA |
| FOXM1 | hTFtarget | 1329 | 1340 | + | 14.4474 | 5.91E-06 | 0.0228 | CAGCCACTCAGG |
| EP300 | hTFtarget | 1411 | 1422 | + | 14.4474 | 5.94E-06 | 0.0233 | CCACCTTGACCT |
| SPI1 | hTFtarget | 1913 | 1924 | + | 14.7237 | 5.96E-06 | 0.0226 | AGGAGGTGGGGC |
| TFAP2C | hTFtarget | 1706 | 1721 | - | 14.5909 | 5.97E-06 | 0.0111 | CCTGGCCTTAGGCAGA |
| HNF1A | database | 1926 | 1939 | + | 14.6162 | 5.98E-06 | 0.0237 | GGTTAATGTTTGTC |
| HNF1A | database | 1926 | 1939 | + | 14.6162 | 5.98E-06 | 0.0237 | GGTTAATGTTTGTC |
| GTF2B | hTFtarget | 1913 | 1924 | - | 14.7632 | 5.98E-06 | 0.0112 | GCCCCACCTCCT |
| AR | hTFtarget | 335 | 346 | - | 13.4 | 5.99E-06 | 0.0186 | AGGAACAGTGTG |
| PBX3 | database | 1328 | 1341 | - | 14.1207 | 6.00E-06 | 0.0235 | TCCTGAGTGGCTGG |
| MYOD1 | hTFtarget | 812 | 820 | - | 14.6842 | 6.03E-06 | 0.024 | CTGTCACCC |
| SPI1 | hTFtarget | 1909 | 1924 | + | 14.2895 | 6.03E-06 | 0.0222 | TGGGAGGAGGTGGGGC |
| PBX3 | database | 1328 | 1341 | + | 14.0714 | 6.03E-06 | 0.0238 | CCAGCCACTCAGGA |
| SPI1 | hTFtarget | 762 | 773 | + | 14.7286 | 6.04E-06 | 0.012 | GGGAGGCGGAGG |
| RB1 | hTFtarget | 1557 | 1571 | + | 14.9545 | 6.06E-06 | 0.0214 | TCCTCCCGCCTTGGC |
| REST | hTFtarget | 1568 | 1580 | + | 13.3143 | 6.11E-06 | 0.0236 | TGGCCAAAGTGCT |
| REST | hTFtarget | 1567 | 1581 | + | 9.86364 | 6.13E-06 | 0.0237 | TTGGCCAAAGTGCTG |
| SPI1 | hTFtarget | 762 | 777 | - | 14.4857 | 6.13E-06 | 0.0142 | GCAACCTCCGCCTCCC |
| TFAP2C | hTFtarget | 1706 | 1721 | + | 14.4697 | 6.14E-06 | 0.0112 | TCTGCCTAAGGCCAGG |
| TFAP2C | hTFtarget | 1359 | 1373 | - | 14.5909 | 6.15E-06 | 0.0225 | GGTGCCCTCCGGCCA |
| T | hTFtarget | 98 | 109 | + | 14.6286 | 6.19E-06 | 0.0117 | TCTCAGCGGGAA |
| SPI1 | hTFtarget | 763 | 778 | - | 14.5286 | 6.22E-06 | 0.0226 | TGCAACCTCCGCCTCC |
| E2F4 | hTFtarget | 1914 | 1925 | - | 14.6053 | 6.22E-06 | 0.0234 | AGCCCCACCTCC |
| EP300 | hTFtarget | 1323 | 1338 | + | 14.1408 | 6.23E-06 | 0.0244 | CATCCCCAGCCACTCA |
| MAZ | database | 1908 | 1921 | + | 14.5169 | 6.24E-06 | 0.0229 | GTGGGAGGAGGTGG |
| KLF4 | hTFtarget | 630 | 641 | + | 14.4868 | 6.25E-06 | 0.0219 | CTTGAGGTCAGG |
| FLI1 | hTFtarget | 1028 | 1052 | - | -15.8 | 6.30E-06 | 0.011 | CCTGCCTTCTGTTCTTCACTCCAGC |
| REST | hTFtarget | 1567 | 1582 | + | 10.5758 | 6.31E-06 | 0.0119 | TTGGCCAAAGTGCTGG |
| ETV1 | hTFtarget | 1189 | 1199 | + | 13.4286 | 6.38E-06 | 0.0254 | CTGTTTACCTT |
| STAT1 | hTFtarget | 366 | 381 | + | 13.8462 | 6.38E-06 | 0.0239 | CGGTCCTTCCCCTTCC |
| KLF1 | database | 129 | 138 | + | 14.9388 | 6.39E-06 | 0.0234 | CCCCACCCAC |
| FLI1 | hTFtarget | 1032 | 1056 | - | -36.9697 | 6.39E-06 | 0.0117 | GCCCCCTGCCTTCTGTTCTTCACTC |
| PRKDC | hTFtarget | 1913 | 1924 | + | 14.7105 | 6.39E-06 | 0.0238 | AGGAGGTGGGGC |
| SPI1 | hTFtarget | 1913 | 1924 | + | 14.6429 | 6.40E-06 | 0.012 | AGGAGGTGGGGC |
| SP1 | hTFtarget | 1913 | 1924 | + | 14.5789 | 6.41E-06 | 0.0243 | AGGAGGTGGGGC |
| TCF12 | hTFtarget | 892 | 907 | + | 14.4848 | 6.41E-06 | 0.0236 | TGCCACCTGCACCCAG |
| AR | hTFtarget | 6 | 21 | + | 14.3944 | 6.43E-06 | 0.0175 | CAAACAAAGTAATACA |
| POLR2A | hTFtarget | 763 | 778 | - | 14.0395 | 6.45E-06 | 0.0127 | TGCAACCTCCGCCTCC |
| SPI1 | hTFtarget | 759 | 779 | - | 14.3816 | 6.45E-06 | 0.012 | CTGCAACCTCCGCCTCCCGGG |
| SPI1 | hTFtarget | 1913 | 1924 | + | 14.7 | 6.46E-06 | 0.0245 | AGGAGGTGGGGC |
| SP1 | database | 1990 | 2000 | + | 14.7692 | 6.47E-06 | 0.012 | GTCCCTCCCCT |
| SPI1 | hTFtarget | 1913 | 1924 | + | 14.5571 | 6.47E-06 | 0.0249 | AGGAGGTGGGGC |
| IRF1 | hTFtarget | 373 | 388 | + | 14.1429 | 6.48E-06 | 0.0245 | TCCCCTTCCAGCTCCT |
| SPI1 | hTFtarget | 762 | 777 | - | 14.5132 | 6.48E-06 | 0.0242 | GCAACCTCCGCCTCCC |
| TFAP2C | hTFtarget | 1361 | 1372 | - | 14.3939 | 6.50E-06 | 0.024 | GTGCCCTCCGGC |
| EP300 | hTFtarget | 1909 | 1924 | - | 13.8857 | 6.50E-06 | 0.0146 | GCCCCACCTCCTCCCA |
| SUZ12 | hTFtarget | 1709 | 1730 | + | 13.6053 | 6.51E-06 | 0.0225 | GCCTAAGGCCAGGGCATGGGGG |
| NFYB | hTFtarget | 1914 | 1925 | - | 14.25 | 6.52E-06 | 0.0245 | AGCCCCACCTCC |
| SPI1 | hTFtarget | 1912 | 1927 | - | 14.4429 | 6.52E-06 | 0.0138 | CCAGCCCCACCTCCTC |
| E2F6 | hTFtarget | 1558 | 1569 | - | 14.7 | 6.55E-06 | 0.0245 | CAAGGCGGGAGG |
| SPI1 | hTFtarget | 1913 | 1924 | - | 14.5286 | 6.60E-06 | 0.025 | GCCCCACCTCCT |
| HNF1B | hTFtarget | 1169 | 1186 | + | 14.25 | 6.62E-06 | 0.0131 | CAGTTAATGGTTGACAGT |
| PML | hTFtarget | 1417 | 1425 | - | 14.7763 | 6.62E-06 | 0.0254 | CTGAGGTCA |
| RUNX1 | hTFtarget | 1338 | 1346 | + | 15.0263 | 6.62E-06 | 0.0259 | AGGATGTGG |
| TEAD4 | hTFtarget | 352 | 360 | + | 13.5395 | 6.62E-06 | 0.0264 | CTGGAATGC |
| CDK8 | hTFtarget | 418 | 426 | + | 14.2895 | 6.62E-06 | 0.026 | CACTTCCTC |
| EP300 | hTFtarget | 1245 | 1253 | + | 11.9143 | 6.62E-06 | 0.0263 | CAACTGCCT |
| EGR1 | hTFtarget | 1904 | 1924 | + | 12.5143 | 6.63E-06 | 0.0246 | GTATGTGGGAGGAGGTGGGGC |
| GATA1 | hTFtarget | 1904 | 1919 | + | 13.1024 | 6.64E-06 | 0.0251 | GTATGTGGGAGGAGGT |
| SUZ12 | hTFtarget | 762 | 777 | - | 14.4079 | 6.67E-06 | 0.0247 | GCAACCTCCGCCTCCC |
| CREBBP | hTFtarget | 416 | 427 | + | 14.4286 | 6.67E-06 | 0.0252 | CTCACTTCCTCT |
| MAX | hTFtarget | 1913 | 1924 | - | 14.25 | 6.68E-06 | 0.0247 | GCCCCACCTCCT |
| GTF2I | hTFtarget | 1654 | 1665 | + | 14.1974 | 6.69E-06 | 0.0263 | CAGGATGGCAGC |
| REST | hTFtarget | 1567 | 1582 | + | 10.4091 | 6.70E-06 | 0.0257 | TTGGCCAAAGTGCTGG |
| GLI2 | hTFtarget | 762 | 773 | + | 14.5143 | 6.78E-06 | 0.0128 | GGGAGGCGGAGG |
| E2F4 | hTFtarget | 1558 | 1566 | - | 15.5263 | 6.78E-06 | 0.0249 | GGCGGGAGG |
| RUNX2 | database | 1097 | 1111 | - | 14.5082 | 6.79E-06 | 0.0264 | GTGTTCTGTGGCCTG |
| POLR2A | hTFtarget | 766 | 781 | - | 13.9474 | 6.80E-06 | 0.0127 | CACTGCAACCTCCGCC |
| BTAF1 | hTFtarget | 1909 | 1933 | - | 5.94737 | 6.82E-06 | 0.0233 | CATTAACCAGCCCCACCTCCTCCCA |
| LMNB1 | hTFtarget | 1758 | 1773 | + | 11.8293 | 6.83E-06 | 0.00511 | GTCCAGCTCAGTCTCC |
| CEBPE | database | 785 | 798 | + | 13.1892 | 6.88E-06 | 0.0272 | CAAGATTGCGCCAC |
| RBCK1 | hTFtarget | 762 | 773 | - | 14.6053 | 6.88E-06 | 0.013 | CCTCCGCCTCCC |
| GLI2 | hTFtarget | 1913 | 1924 | + | 14.5 | 6.89E-06 | 0.0128 | AGGAGGTGGGGC |
| IRF4 | hTFtarget | 415 | 426 | - | 14.4545 | 6.89E-06 | 0.027 | GAGGAAGTGAGG |
| E2F4 | hTFtarget | 1914 | 1925 | + | 14.3684 | 6.91E-06 | 0.0262 | GGAGGTGGGGCT |
| BRCA1 | hTFtarget | 1913 | 1924 | - | 14.3421 | 6.95E-06 | 0.0246 | GCCCCACCTCCT |
| CBX4 | hTFtarget | 1453 | 1464 | - | 14.25 | 6.97E-06 | 0.0257 | AATGGGGAGGAA |
| SMAD1 | hTFtarget | 99 | 108 | - | 14.4286 | 6.98E-06 | 0.0131 | TCCCGCTGAG |
| SPI1 | hTFtarget | 1913 | 1924 | + | 14.4211 | 6.99E-06 | 0.0265 | AGGAGGTGGGGC |
| SPI1 | hTFtarget | 1913 | 1924 | + | 14.4429 | 6.99E-06 | 0.0264 | AGGAGGTGGGGC |
| SRC | hTFtarget | 1474 | 1485 | - | 13.1558 | 6.99E-06 | 0.0278 | TAAATAAACACA |
| ZNF263 | database | 331 | 351 | - | 13.7347 | 7.01E-06 | 0.0173 | GGAGGAGGAACAGTGTGAGTG |
| ETS1 | hTFtarget | 59 | 74 | + | 14.0526 | 7.01E-06 | 0.0266 | CGGGAAACGGTAGTCC |
| SPI1 | hTFtarget | 1913 | 1924 | + | 14.4079 | 7.01E-06 | 0.0268 | AGGAGGTGGGGC |
| TFAP2A | database | 1705 | 1719 | + | 14.4 | 7.02E-06 | 0.0261 | ATCTGCCTAAGGCCA |
| PRAME | hTFtarget | 762 | 773 | + | 14.5526 | 7.02E-06 | 0.0128 | GGGAGGCGGAGG |
| SPI1 | hTFtarget | 1913 | 1928 | + | 14.3714 | 7.02E-06 | 0.0132 | AGGAGGTGGGGCTGGT |
| PCGF2 | hTFtarget | 115 | 136 | + | 14.1053 | 7.06E-06 | 0.0177 | GTGTTCAGCCTGTCCCCCACCC |
| AR | hTFtarget | 1474 | 1495 | - | 13.662 | 7.06E-06 | 0.0279 | AAAGTATAAATAAATAAACACA |
| SPI1 | hTFtarget | 1912 | 1927 | - | 14.1974 | 7.07E-06 | 0.027 | CCAGCCCCACCTCCTC |
| USF1 | hTFtarget | 761 | 776 | - | 13.9605 | 7.08E-06 | 0.0256 | CAACCTCCGCCTCCCG |
| REST | hTFtarget | 1567 | 1582 | + | 7.15714 | 7.09E-06 | 0.0271 | TTGGCCAAAGTGCTGG |
| ESR1 | hTFtarget | 1411 | 1422 | - | 13.7424 | 7.11E-06 | 0.0261 | AGGTCAAGGTGG |
| TEAD4 | hTFtarget | 1566 | 1581 | - | 9.74242 | 7.11E-06 | 0.0273 | CAGCACTTTGGCCAAG |
| NFATC1 | hTFtarget | 241 | 259 | - | 14.1061 | 7.13E-06 | 0.0276 | TGGAGGAAACTGTCAGTCA |
| SPI1 | hTFtarget | 1913 | 1924 | + | 14.3816 | 7.14E-06 | 0.0271 | AGGAGGTGGGGC |
| ZNF143 | hTFtarget | 652 | 673 | + | 13.6316 | 7.14E-06 | 0.0277 | CAGCCTGGCCAACGTGGTGAAA |
| SP1 | database | 1914 | 1924 | + | 14.2809 | 7.16E-06 | 0.0228 | GGAGGTGGGGC |
| RELA | hTFtarget | 59 | 74 | + | 14.0921 | 7.18E-06 | 0.0282 | CGGGAAACGGTAGTCC |
| ZNF274 | hTFtarget | 1384 | 1399 | - | 10.6143 | 7.19E-06 | 0.0282 | GCTTCCCACCCATATG |
| HAND1 | hTFtarget | 472 | 487 | - | 14.2857 | 7.21E-06 | 0.0281 | TGAGAGAGTCCAGAGA |
| ERG | hTFtarget | 1031 | 1055 | - | -12.6053 | 7.21E-06 | 0.0126 | CCCCCTGCCTTCTGTTCTTCACTCC |
| HDAC2 | hTFtarget | 99 | 110 | - | 14.3816 | 7.22E-06 | 0.0138 | CTTCCCGCTGAG |
| HDAC2 | hTFtarget | 1109 | 1120 | - | 14.3816 | 7.22E-06 | 0.0138 | GACCCTGCTGTG |
| E2F1 | database | 1558 | 1568 | - | 14.6721 | 7.25E-06 | 0.0256 | AAGGCGGGAGG |
| TRIM28 | hTFtarget | 124 | 139 | + | 13.7895 | 7.25E-06 | 0.021 | CTGTCCCCCACCCACC |
| EP300 | hTFtarget | 1476 | 1484 | - | 14.013 | 7.28E-06 | 0.029 | AAATAAACA |
| EP300 | hTFtarget | 1476 | 1484 | - | 13.2727 | 7.28E-06 | 0.029 | AAATAAACA |
| SPI1 | hTFtarget | 1913 | 1926 | + | 14.3158 | 7.30E-06 | 0.0275 | AGGAGGTGGGGCTG |
| SPI1 | hTFtarget | 1913 | 1924 | - | 14.4211 | 7.32E-06 | 0.0281 | GCCCCACCTCCT |
| BCL11A | hTFtarget | 352 | 360 | - | 14.3816 | 7.34E-06 | 0.0292 | GCATTCCAG |
| AR | hTFtarget | 1469 | 1493 | + | 13.8592 | 7.35E-06 | 0.0145 | TCTAATGTGTTTATTTATTTATACT |
| ZFP42 | hTFtarget | 1913 | 1924 | + | 14.2237 | 7.36E-06 | 0.0275 | AGGAGGTGGGGC |
| TFAP2C | hTFtarget | 1705 | 1719 | + | 14.2273 | 7.37E-06 | 0.0276 | ATCTGCCTAAGGCCA |
| ZNF740 | database | 129 | 138 | - | 14.4312 | 7.38E-06 | 0.0268 | GTGGGTGGGG |
| NANOG | hTFtarget | 1109 | 1120 | + | 14 | 7.39E-06 | 0.0135 | CACAGCAGGGTC |
| SPI1 | hTFtarget | 1914 | 1925 | - | 14.3816 | 7.39E-06 | 0.028 | AGCCCCACCTCC |
| SPI1 | hTFtarget | 761 | 776 | - | 14.2429 | 7.41E-06 | 0.0138 | CAACCTCCGCCTCCCG |
| STAT3 | hTFtarget | 374 | 395 | + | 14 | 7.41E-06 | 0.0272 | CCCCTTCCAGCTCCTACCTGTC |
| RB1 | hTFtarget | 611 | 626 | + | 14.3429 | 7.43E-06 | 0.0128 | GGCTGAGGCGGGCAGA |
| ELL2 | hTFtarget | 1654 | 1665 | + | 14.1579 | 7.43E-06 | 0.0292 | CAGGATGGCAGC |
| GTF2I | hTFtarget | 609 | 624 | - | 13.8714 | 7.46E-06 | 0.014 | TGCCCGCCTCAGCCTC |
| TRIM28 | hTFtarget | 590 | 605 | - | 13.7105 | 7.46E-06 | 0.0294 | AAGCACTGGGATTACA |
| TFAP2C | hTFtarget | 1357 | 1372 | - | 14.2576 | 7.47E-06 | 0.0276 | GTGCCCTCCGGCCACT |
| POLR2A | hTFtarget | 606 | 621 | - | 13.6579 | 7.48E-06 | 0.0281 | CCGCCTCAGCCTCCCA |
| REST | hTFtarget | 1569 | 1582 | + | 11.8333 | 7.51E-06 | 0.0284 | GGCCAAAGTGCTGG |
| HNF1A | database | 1170 | 1184 | - | 13.94 | 7.51E-06 | 0.018 | TGTCAACCATTAACT |
| HNF1A | database | 1170 | 1184 | + | 13.974 | 7.52E-06 | 0.0179 | AGTTAATGGTTGACA |
| E2F4 | database | 103 | 112 | + | 14.1284 | 7.52E-06 | 0.0275 | GCGGGAAGAA |
| CEBPB | hTFtarget | 788 | 799 | + | 14.6364 | 7.52E-06 | 0.0299 | GATTGCGCCACT |
| REX1 | database | 1655 | 1666 | + | 13.9545 | 7.59E-06 | 0.0287 | AGGATGGCAGCC |
| ESR1 | hTFtarget | 1597 | 1608 | + | 14.3857 | 7.60E-06 | 0.0291 | GCCACCATGCCC |
| TP53 | hTFtarget | 1602 | 1617 | + | 13.3333 | 7.60E-06 | 0.0299 | CATGCCCGGCCCTGTC |
| REST | hTFtarget | 1567 | 1582 | + | 8.71212 | 7.61E-06 | 0.0293 | TTGGCCAAAGTGCTGG |
| SPI1 | hTFtarget | 415 | 430 | - | 13.5857 | 7.61E-06 | 0.0293 | CCTAGAGGAAGTGAGG |
| BCL6 | database | 349 | 364 | - | 13.3222 | 7.63E-06 | 0.0303 | GTTAGCATTCCAGGGA |
| SPI1 | hTFtarget | 1913 | 1928 | - | 14.1571 | 7.63E-06 | 0.0142 | ACCAGCCCCACCTCCT |
| SPI1 | hTFtarget | 1913 | 1924 | + | 14.3026 | 7.64E-06 | 0.029 | AGGAGGTGGGGC |
| SPI1 | hTFtarget | 1913 | 1928 | - | 14.2368 | 7.64E-06 | 0.0287 | ACCAGCCCCACCTCCT |
| ZBTB17 | hTFtarget | 1433 | 1448 | + | 12.9342 | 7.64E-06 | 0.0294 | CAGGCATCACCCATGG |
| CEBPB | hTFtarget | 786 | 801 | + | 14.4697 | 7.64E-06 | 0.0303 | AAGATTGCGCCACTGC |
| EPAS1 | hTFtarget | 906 | 916 | - | 13.5571 | 7.66E-06 | 0.0296 | GGCTACGTGCT |
| KLF4 | hTFtarget | 1789 | 1797 | - | 14.1212 | 7.67E-06 | 0.0147 | ACCCACCCA |
| KLF5 | hTFtarget | 129 | 137 | + | 14.4429 | 7.67E-06 | 0.0291 | CCCCACCCA |
| OTX2 | hTFtarget | 1109 | 1117 | + | 14.9737 | 7.67E-06 | 0.0179 | CACAGCAGG |
| SMAD1 | hTFtarget | 1109 | 1117 | + | 15.2763 | 7.67E-06 | 0.0287 | CACAGCAGG |
| EGR2 | database | 1904 | 1918 | - | 14.4098 | 7.72E-06 | 0.0295 | CCTCCTCCCACATAC |
| TAF1 | hTFtarget | 767 | 788 | - | 13.3158 | 7.73E-06 | 0.0284 | CTTGGCTCACTGCAACCTCCGC |
| TRIM24 | hTFtarget | 1923 | 1944 | - | 13.7692 | 7.79E-06 | 0.0133 | AACCAGACAAACATTAACCAGC |
| NFYA | hTFtarget | 1914 | 1925 | - | 14.2632 | 7.81E-06 | 0.0293 | AGCCCCACCTCC |
| REST | hTFtarget | 1565 | 1582 | + | 9.24242 | 7.81E-06 | 0.0298 | CCTTGGCCAAAGTGCTGG |
| BCL6 | database | 349 | 364 | + | 13.2929 | 7.81E-06 | 0.031 | TCCCTGGAATGCTAAC |
| SPI1 | hTFtarget | 1913 | 1928 | - | 14.2 | 7.82E-06 | 0.0251 | ACCAGCCCCACCTCCT |
| TFAP2A | hTFtarget | 1705 | 1720 | - | 14.1667 | 7.83E-06 | 0.0148 | CTGGCCTTAGGCAGAT |
| RFX5 | hTFtarget | 719 | 734 | - | 13.9545 | 7.84E-06 | 0.0302 | CTCACGAGTAGCTGGG |
| SPI1 | hTFtarget | 760 | 775 | - | 14.2143 | 7.84E-06 | 0.0147 | AACCTCCGCCTCCCGG |
| SPI1 | hTFtarget | 1909 | 1930 | + | 13.7143 | 7.84E-06 | 0.0152 | TGGGAGGAGGTGGGGCTGGTTA |
| SPI1 | hTFtarget | 762 | 777 | - | 13.9571 | 7.85E-06 | 0.019 | GCAACCTCCGCCTCCC |
| RFX5 | hTFtarget | 719 | 734 | - | 13.9848 | 7.88E-06 | 0.0307 | CTCACGAGTAGCTGGG |
| SPI1 | hTFtarget | 1913 | 1924 | + | 14.2763 | 7.88E-06 | 0.0297 | AGGAGGTGGGGC |
| SPI1 | hTFtarget | 1913 | 1928 | - | 14.2571 | 7.89E-06 | 0.0245 | ACCAGCCCCACCTCCT |
| STAT3 | hTFtarget | 417 | 428 | + | 13.7571 | 7.89E-06 | 0.0304 | TCACTTCCTCTA |
| ZNF143 | hTFtarget | 834 | 854 | + | 13.5769 | 7.89E-06 | 0.0312 | CTCAAAAAAAAGAAGTTGATA |
| TFAP2A | hTFtarget | 1357 | 1372 | - | 14.1515 | 7.92E-06 | 0.0148 | GTGCCCTCCGGCCACT |
| EP300 | hTFtarget | 1188 | 1199 | - | 13.0417 | 7.96E-06 | 0.0316 | AAGGTAAACAGA |
| SMAD1 | hTFtarget | 1109 | 1119 | + | 14.2237 | 7.99E-06 | 0.0171 | CACAGCAGGGT |
| CEBPB | hTFtarget | 788 | 799 | + | 14.6212 | 7.99E-06 | 0.0318 | GATTGCGCCACT |
| CEBPD | database | 789 | 799 | - | 12.6627 | 8.02E-06 | 0.0317 | AGTGGCGCAAT |
| CEBPD | database | 789 | 799 | - | 12.65 | 8.02E-06 | 0.0319 | AGTGGCGCAAT |
| ZNF143 | database | 1364 | 1385 | + | 13.427 | 8.04E-06 | 0.0297 | GGAGGGCACCCTGGTACTGCCA |
| SPI1 | hTFtarget | 762 | 777 | - | 14.1 | 8.04E-06 | 0.0223 | GCAACCTCCGCCTCCC |
| SMAD1 | hTFtarget | 419 | 427 | - | 13.0143 | 8.06E-06 | 0.0317 | AGAGGAAGT |
| ZNF76 | database | 1364 | 1385 | + | 13.4286 | 8.07E-06 | 0.0298 | GGAGGGCACCCTGGTACTGCCA |
| ZNF282 | database | 1287 | 1303 | + | 11.7449 | 8.09E-06 | 0.0317 | TTAGGGTTCTGGGATAG |
| SP1 | hTFtarget | 1913 | 1924 | - | 14.2857 | 8.10E-06 | 0.0312 | GCCCCACCTCCT |
| EOMES | hTFtarget | 878 | 899 | + | 13.7727 | 8.10E-06 | 0.032 | GTTTTCACCTCCTTTGCCACCT |
| GTF2I | hTFtarget | 1248 | 1269 | - | 13.3289 | 8.11E-06 | 0.0193 | TCTACCCTCAAGGCCAAGGCAG |
| ESR1 | hTFtarget | 641 | 656 | - | 14.2632 | 8.12E-06 | 0.032 | GGCTGGTCTCGAACTC |
| FLI1 | hTFtarget | 1072 | 1093 | + | -1.94286 | 8.12E-06 | 0.0287 | CTTCCCTTGTTTCTCCACTGCC |
| MAZ | database | 1992 | 1999 | - | 15.3303 | 8.13E-06 | 0.0299 | GGGGAGGG |
| ESR1 | hTFtarget | 760 | 775 | - | 12.4737 | 8.13E-06 | 0.0231 | AACCTCCGCCTCCCGG |
| GTF2I | hTFtarget | 344 | 352 | + | 14.5714 | 8.13E-06 | 0.00735 | CCTCCTCCC |
| GTF2I | hTFtarget | 1910 | 1918 | - | 14.5714 | 8.13E-06 | 0.00735 | CCTCCTCCC |
| BCL6 | hTFtarget | 1991 | 1999 | - | 15.5395 | 8.13E-06 | 0.03 | GGGGAGGGA |
| POLR2A | hTFtarget | 763 | 778 | - | 13.6714 | 8.14E-06 | 0.0303 | TGCAACCTCCGCCTCC |
| REST | hTFtarget | 1567 | 1582 | + | 9.10606 | 8.18E-06 | 0.0316 | TTGGCCAAAGTGCTGG |
| SPI1 | hTFtarget | 837 | 851 | - | 14.0132 | 8.19E-06 | 0.0316 | CAACTTCTTTTTTTT |
| CEBPB | hTFtarget | 788 | 799 | - | 14.2143 | 8.19E-06 | 0.0326 | AGTGGCGCAATC |
| SPI1 | hTFtarget | 758 | 779 | + | 13.6286 | 8.23E-06 | 0.0152 | ACCCGGGAGGCGGAGGTTGCAG |
| SETDB1 | hTFtarget | 1490 | 1511 | - | 11.9211 | 8.25E-06 | 0.0271 | GACCCCATCTCTACAAAAAGTA |
| SPI1 | hTFtarget | 760 | 775 | - | 14.1714 | 8.29E-06 | 0.0157 | AACCTCCGCCTCCCGG |
| POLR2A | hTFtarget | 764 | 779 | - | 13.1842 | 8.32E-06 | 0.0313 | CTGCAACCTCCGCCTC |
| ZNF274 | hTFtarget | 1384 | 1399 | + | 9.95455 | 8.34E-06 | 0.0328 | CATATGGGTGGGAAGC |
| CBX3 | hTFtarget | 1078 | 1093 | - | 13.5658 | 8.38E-06 | 0.033 | GGCAGTGGAGAAACAA |
| CEBPB | hTFtarget | 786 | 801 | + | 14.0909 | 8.42E-06 | 0.0334 | AAGATTGCGCCACTGC |
| E2F4 | hTFtarget | 1914 | 1925 | + | 13.9868 | 8.42E-06 | 0.0318 | GGAGGTGGGGCT |
| KLF4 | hTFtarget | 128 | 139 | - | 14.2286 | 8.43E-06 | 0.0309 | GGTGGGTGGGGG |
| EGR1 | hTFtarget | 1908 | 1923 | - | 13.7424 | 8.43E-06 | 0.0317 | CCCCACCTCCTCCCAC |
| ZFX | database | 986 | 1004 | + | 14.0606 | 8.45E-06 | 0.0279 | GGGAAGCTGAGGCCCTGGC |
| TFAP2C | hTFtarget | 1359 | 1372 | - | 14.0152 | 8.46E-06 | 0.0157 | GTGCCCTCCGGCCA |
| ZFX | database | 986 | 1004 | + | 14.0612 | 8.47E-06 | 0.0285 | GGGAAGCTGAGGCCCTGGC |
| REST | hTFtarget | 1563 | 1582 | - | 5.27273 | 8.48E-06 | 0.0329 | CCAGCACTTTGGCCAAGGCG |
| HIF1A | database | 903 | 916 | - | 14.1939 | 8.49E-06 | 0.0303 | GGCTACGTGCTGGG |
| SPI1 | hTFtarget | 1914 | 1925 | - | 14.2143 | 8.50E-06 | 0.0318 | AGCCCCACCTCC |
| PPARG:RXRA | database | 546 | 560 | - | 13.7297 | 8.51E-06 | 0.0317 | CTGGAGGAGAGGGGA |
| SP3 | database | 1904 | 1923 | + | 13.7798 | 8.60E-06 | 0.0148 | GTATGTGGGAGGAGGTGGGG |
| NR3C1 | database | 1036 | 1048 | - | 11.75 | 8.61E-06 | 0.0337 | CCTTCTGTTCTTC |
| ELF2 | database | 415 | 429 | - | 14.4954 | 8.64E-06 | 0.0331 | CTAGAGGAAGTGAGG |
| ELF2 | database | 415 | 429 | - | 14.5306 | 8.64E-06 | 0.0331 | CTAGAGGAAGTGAGG |
| REST | hTFtarget | 656 | 671 | + | 9.95455 | 8.66E-06 | 0.0167 | CTGGCCAACGTGGTGA |
| ELL2 | hTFtarget | 759 | 779 | + | 13.3553 | 8.68E-06 | 0.0276 | CCCGGGAGGCGGAGGTTGCAG |
| MYC | hTFtarget | 760 | 775 | + | 14.0132 | 8.69E-06 | 0.0323 | CCGGGAGGCGGAGGTT |
| E2F6 | hTFtarget | 1557 | 1568 | - | 14.6714 | 8.69E-06 | 0.0322 | AAGGCGGGAGGA |
| POLR2A | hTFtarget | 761 | 780 | - | 12.878 | 8.72E-06 | 0.0301 | ACTGCAACCTCCGCCTCCCG |
| EP300 | hTFtarget | 879 | 894 | + | 13.5571 | 8.72E-06 | 0.0146 | TTTTCACCTCCTTTGC |
| ESR1 | hTFtarget | 633 | 641 | + | 13.1143 | 8.74E-06 | 0.0329 | GAGGTCAGG |
| SP7 | database | 1904 | 1923 | + | 13.7156 | 8.77E-06 | 0.0149 | GTATGTGGGAGGAGGTGGGG |
| REST | hTFtarget | 1567 | 1582 | + | 7.68182 | 8.80E-06 | 0.0339 | TTGGCCAAAGTGCTGG |
| SPI1 | hTFtarget | 762 | 777 | + | 14.0429 | 8.80E-06 | 0.0248 | GGGAGGCGGAGGTTGC |
| USF2 | hTFtarget | 1913 | 1924 | + | 14.1429 | 8.80E-06 | 0.0164 | AGGAGGTGGGGC |
| VEZF1 | hTFtarget | 883 | 904 | + | 13.1286 | 8.81E-06 | 0.0137 | CACCTCCTTTGCCACCTGCACC |
| SPI1 | hTFtarget | 1913 | 1928 | - | 13.9571 | 8.82E-06 | 0.0185 | ACCAGCCCCACCTCCT |
| AR | hTFtarget | 1474 | 1489 | - | 13.9437 | 8.84E-06 | 0.0175 | TAAATAAATAAACACA |
| BRD7 | hTFtarget | 807 | 828 | + | 13 | 8.85E-06 | 0.0291 | AGCCTGGGTGACAGAGTGAGAC |
| SMAD1 | hTFtarget | 99 | 109 | + | 14.0921 | 8.86E-06 | 0.0171 | CTCAGCGGGAA |
| SP2 | hTFtarget | 1476 | 1491 | + | 13.7639 | 8.93E-06 | 0.0176 | TGTTTATTTATTTATA |
| FOXP2 | hTFtarget | 1189 | 1197 | + | 13.7879 | 8.94E-06 | 0.0356 | CTGTTTACC |
| ARRB1 | hTFtarget | 465 | 473 | + | 14.2763 | 8.94E-06 | 0.0356 | ATTCCCTTC |
| RELA | hTFtarget | 368 | 383 | + | 13.9474 | 8.94E-06 | 0.0153 | GTCCTTCCCCTTCCAG |
| BRD4 | hTFtarget | 417 | 425 | - | 12.3286 | 8.94E-06 | 0.0346 | AGGAAGTGA |
| FOXN3 | database | 1475 | 1487 | - | 14.0505 | 9.00E-06 | 0.0357 | AATAAATAAACAC |
| HNF1A | database | 1926 | 1940 | + | 13.7532 | 9.01E-06 | 0.0179 | GGTTAATGTTTGTCT |
| GTF2I | hTFtarget | 345 | 353 | - | 14.9868 | 9.01E-06 | 0.0346 | AGGGAGGAG |
| UBTF | hTFtarget | 763 | 771 | + | 13.0833 | 9.01E-06 | 0.0178 | GGAGGCGGA |
| FOXJ3 | database | 1475 | 1487 | + | 14.0758 | 9.02E-06 | 0.0358 | GTGTTTATTTATT |
| ESR1 | hTFtarget | 1188 | 1199 | - | 13.6494 | 9.02E-06 | 0.0359 | AAGGTAAACAGA |
| FLI1 | database | 417 | 427 | - | 14.1455 | 9.03E-06 | 0.0351 | AGAGGAAGTGA |
| REST | hTFtarget | 1567 | 1582 | + | 11.1515 | 9.05E-06 | 0.0345 | TTGGCCAAAGTGCTGG |
| SP2 | database | 759 | 773 | - | 14.069 | 9.08E-06 | 0.0169 | CCTCCGCCTCCCGGG |
| SP2 | hTFtarget | 731 | 749 | - | 12.0649 | 9.08E-06 | 0.0169 | TTCTTCTGCCTCAGCCTCA |
| CDK9 | hTFtarget | 1358 | 1379 | - | 12.9474 | 9.08E-06 | 0.0302 | TACCAGGGTGCCCTCCGGCCAC |
| HNF1A | database | 1926 | 1940 | - | 13.71 | 9.08E-06 | 0.018 | AGACAAACATTAACC |
| MYBL2 | hTFtarget | 54 | 75 | + | 13 | 9.19E-06 | 0.036 | GTACACGGGAAACGGTAGTCCT |
| SPI1 | hTFtarget | 1989 | 2000 | + | 14.0526 | 9.19E-06 | 0.035 | TGTCCCTCCCCT |
| NCOR2 | hTFtarget | 418 | 429 | + | 13.7 | 9.20E-06 | 0.0361 | CACTTCCTCTAG |
| NFIC | hTFtarget | 1965 | 1984 | - | 14.0571 | 9.20E-06 | 0.0309 | ACCCAGGGCCAGAGCCAGAA |
| NR2F2 | hTFtarget | 1414 | 1429 | + | 13.1212 | 9.26E-06 | 0.0358 | CCTTGACCTCAGGTGC |
| SPI1 | hTFtarget | 1427 | 1442 | + | 13.7763 | 9.30E-06 | 0.0348 | TGCCAGCAGGCATCAC |
| EP300 | hTFtarget | 766 | 781 | - | 13.0789 | 9.31E-06 | 0.0172 | CACTGCAACCTCCGCC |
| CREBBP | hTFtarget | 975 | 986 | - | 13.8947 | 9.32E-06 | 0.0354 | CTTAGCCAAACC |
| GATA3 | database | 197 | 205 | - | 10.6707 | 9.34E-06 | 0.0371 | CAGATAGGG |
| STAT5A | hTFtarget | 418 | 426 | + | 13.7143 | 9.34E-06 | 0.0355 | CACTTCCTC |
| HNF1A | database | 1169 | 1186 | + | 13.2717 | 9.36E-06 | 0.0186 | CAGTTAATGGTTGACAGT |
| CEBPB | hTFtarget | 788 | 799 | + | 14.1061 | 9.36E-06 | 0.0372 | GATTGCGCCACT |
| FLI1 | hTFtarget | 1037 | 1052 | + | 13.3931 | 9.38E-06 | 0.0343 | AAGAACAGAAGGCAGG |
| E2F6 | database | 1557 | 1568 | - | 13.8532 | 9.38E-06 | 0.034 | AAGGCGGGAGGA |
| POLR2A | hTFtarget | 1810 | 1821 | - | 13.8947 | 9.40E-06 | 0.012 | CAGAGGAAGAGA |
| SPI1 | hTFtarget | 415 | 426 | + | 13.9737 | 9.40E-06 | 0.0364 | CCTCACTTCCTC |
| AR | database | 332 | 346 | - | 14.1538 | 9.45E-06 | 0.0363 | AGGAACAGTGTGAGT |
| IRF3 | hTFtarget | 1317 | 1338 | + | 13.7763 | 9.45E-06 | 0.0349 | TGGGTCCATCCCCAGCCACTCA |
| NFYA | hTFtarget | 241 | 254 | + | 13.9868 | 9.47E-06 | 0.0372 | TGACTGACAGTTTC |
| E2F6 | database | 1557 | 1568 | - | 13.8878 | 9.48E-06 | 0.0344 | AAGGCGGGAGGA |
| GLYR1 | hTFtarget | 762 | 781 | + | 11.4024 | 9.49E-06 | 0.00916 | GGGAGGCGGAGGTTGCAGTG |
| TCF12 | hTFtarget | 1109 | 1117 | + | 14.9211 | 9.50E-06 | 0.0204 | CACAGCAGG |
| POLR3A | hTFtarget | 684 | 699 | + | 13.6795 | 9.51E-06 | 0.0376 | ACTAAAAATACAAAAA |
| EP300 | hTFtarget | 763 | 778 | - | 13.0395 | 9.51E-06 | 0.0172 | TGCAACCTCCGCCTCC |
| KLF5 | hTFtarget | 129 | 137 | + | 14.6286 | 9.63E-06 | 0.0369 | CCCCACCCA |
| SPI1 | hTFtarget | 1913 | 1924 | + | 14.1053 | 9.65E-06 | 0.0332 | AGGAGGTGGGGC |
| AR | hTFtarget | 120 | 131 | - | 13.1286 | 9.65E-06 | 0.0186 | GGGGACAGGCTG |
| E2F1 | hTFtarget | 1915 | 1926 | + | 13.2237 | 9.65E-06 | 0.0364 | GAGGTGGGGCTG |
| FOXA1 | hTFtarget | 1477 | 1492 | - | 12.9701 | 9.67E-06 | 0.0263 | GTATAAATAAATAAAC |
| TOP1 | hTFtarget | 1964 | 1975 | - | 13.6184 | 9.67E-06 | 0.0373 | CAGAGCCAGAAA |
| MAF | database | 734 | 744 | + | 12.8681 | 9.68E-06 | 0.0378 | GGCTGAGGCAG |
| MYC | hTFtarget | 761 | 776 | - | 13.5526 | 9.68E-06 | 0.0256 | CAACCTCCGCCTCCCG |
| SPI1 | hTFtarget | 1913 | 1924 | + | 13.9737 | 9.68E-06 | 0.0363 | AGGAGGTGGGGC |
| SPI1 | hTFtarget | 762 | 777 | + | 13.8571 | 9.68E-06 | 0.0182 | GGGAGGCGGAGGTTGC |
| TAF1 | hTFtarget | 1654 | 1665 | + | 13.6316 | 9.69E-06 | 0.038 | CAGGATGGCAGC |
| AR | hTFtarget | 116 | 131 | + | 13.6061 | 9.70E-06 | 0.0378 | TGTTCAGCCTGTCCCC |
| SPI1 | hTFtarget | 1908 | 1923 | - | 13.8857 | 9.71E-06 | 0.0195 | CCCCACCTCCTCCCAC |
| BRD7 | hTFtarget | 816 | 834 | + | 13.6623 | 9.73E-06 | 0.019 | GACAGAGTGAGACTGAGTC |
| MAZ | hTFtarget | 1909 | 1924 | - | 13.7286 | 9.74E-06 | 0.0254 | GCCCCACCTCCTCCCA |
| ZNF263 | hTFtarget | 1910 | 1921 | - | 14.4545 | 9.74E-06 | 0.0182 | CCACCTCCTCCC |
| SPI1 | hTFtarget | 762 | 777 | - | 13.9286 | 9.75E-06 | 0.0185 | GCAACCTCCGCCTCCC |
| TFAP2C | hTFtarget | 1361 | 1372 | - | 14.1364 | 9.77E-06 | 0.0344 | GTGCCCTCCGGC |
| PRKDC | hTFtarget | 241 | 251 | - | 13.4571 | 9.79E-06 | 0.0387 | ACTGTCAGTCA |
| RUNX1 | hTFtarget | 1336 | 1347 | - | 13.9868 | 9.80E-06 | 0.0221 | TCCACATCCTGA |
| TP53 | hTFtarget | 1810 | 1821 | - | 12.9147 | 9.81E-06 | 0.0369 | CAGAGGAAGAGA |
| SPIB | hTFtarget | 415 | 430 | - | 13.3939 | 9.84E-06 | 0.0375 | CCTAGAGGAAGTGAGG |
| SPI1 | hTFtarget | 762 | 777 | - | 13.7857 | 9.85E-06 | 0.0185 | GCAACCTCCGCCTCCC |
| NFYB | hTFtarget | 761 | 775 | - | 13.6053 | 9.87E-06 | 0.0186 | AACCTCCGCCTCCCG |
| SPI1 | hTFtarget | 1985 | 2000 | - | 13.4737 | 9.87E-06 | 0.0369 | AGGGGAGGGACAACGA |
| ZNF274 | hTFtarget | 1384 | 1399 | + | 9.88571 | 9.87E-06 | 0.0385 | CATATGGGTGGGAAGC |
| PAX5 | database | 611 | 618 | + | 13.6552 | 9.90E-06 | 0.019 | GGCTGAGG |
| PAX5 | database | 734 | 741 | + | 13.6552 | 9.90E-06 | 0.019 | GGCTGAGG |
| STAT3 | database | 1728 | 1735 | - | 9.18072 | 9.90E-06 | 0.0391 | GGCTTCCC |
| GLI3 | database | 130 | 138 | - | 14.6327 | 9.90E-06 | 0.0358 | GTGGGTGGG |
| OTX2 | hTFtarget | 99 | 107 | + | 14.1974 | 9.90E-06 | 0.0191 | CTCAGCGGG |
| OTX2 | hTFtarget | 99 | 107 | + | 14.1974 | 9.90E-06 | 0.0179 | CTCAGCGGG |
| SP1 | hTFtarget | 543 | 558 | - | 13.5429 | 9.90E-06 | 0.0183 | GGAGGAGAGGGGACCA |
| PAX5 | database | 611 | 618 | - | 13.6122 | 9.90E-06 | 0.0191 | CCTCAGCC |
| PAX5 | database | 734 | 741 | - | 13.6122 | 9.90E-06 | 0.0191 | CCTCAGCC |
| HNF4A | hTFtarget | 799 | 814 | + | 13.6179 | 9.95E-06 | 0.0256 | TGCACTCTAGCCTGGG |
| MBD2 | database | 1358 | 1368 | + | 14.1429 | 9.95E-06 | 0.0338 | GTGGCCGGAGG |
| SPI1 | hTFtarget | 1913 | 1928 | - | 13.8143 | 9.96E-06 | 0.0381 | ACCAGCCCCACCTCCT |
| SPI1 | hTFtarget | 1914 | 1925 | - | 13.7237 | 9.97E-06 | 0.0368 | AGCCCCACCTCC |
| SPI1 | hTFtarget | 762 | 777 | + | 13.7143 | 9.98E-06 | 0.0185 | GGGAGGCGGAGGTTGC |
| RBPJ | hTFtarget | 416 | 427 | + | 14.2763 | 1.00E-05 | 0.0377 | CTCACTTCCTCT |
| SPI1 | hTFtarget | 762 | 777 | - | 14.1316 | 1.00E-05 | 0.0189 | GCAACCTCCGCCTCCC |
| TP53 | database | 1599 | 1618 | + | 13.0408 | 1.00E-05 | 0.0381 | CACCATGCCCGGCCCTGTCA |
| EPAS1 | database | 1910 | 1922 | + | 13.9633 | 1.01E-05 | 0.038 | GGGAGGAGGTGGG |
| MBD2 | database | 1358 | 1368 | + | 14.1579 | 1.01E-05 | 0.0344 | GTGGCCGGAGG |
| TP53 | database | 1599 | 1618 | - | 12.9756 | 1.01E-05 | 0.0385 | TGACAGGGCCGGGCATGGTG |
| PURA | database | 123 | 139 | - | 13.5347 | 1.01E-05 | 0.0126 | GGTGGGTGGGGGACAGG |
| AR | hTFtarget | 116 | 131 | - | 13.5429 | 1.01E-05 | 0.0398 | GGGGACAGGCTGAACA |
| POLR3A | hTFtarget | 1289 | 1304 | - | 14 | 1.01E-05 | 0.0194 | CCTATCCCAGAACCCT |
| SOX17 | hTFtarget | 473 | 487 | + | 13.9143 | 1.01E-05 | 0.0398 | CTCTGGACTCTCTCA |
| SPI1 | hTFtarget | 341 | 352 | + | 13.6571 | 1.01E-05 | 0.0195 | GTTCCTCCTCCC |
| TRIM24 | hTFtarget | 1465 | 1486 | - | 13.4231 | 1.01E-05 | 0.0133 | ATAAATAAACACATTAGATGAC |
| TRIM28 | hTFtarget | 537 | 552 | + | 13.241 | 1.01E-05 | 0.0128 | GGGTCTTGGTCCCCTC |
| CEBPB | hTFtarget | 788 | 799 | + | 14.1061 | 1.01E-05 | 0.0402 | GATTGCGCCACT |
| EPAS1 | database | 1910 | 1922 | - | 13.9898 | 1.01E-05 | 0.0382 | CCCACCTCCTCCC |
| ZFY | database | 994 | 1007 | - | 14.1633 | 1.01E-05 | 0.0359 | GGAGCCAGGGCCTC |
| ZNF263 | database | 1911 | 1931 | + | 13.102 | 1.02E-05 | 0.0173 | GGAGGAGGTGGGGCTGGTTAA |
| NFYA | hTFtarget | 1914 | 1925 | + | 14.1143 | 1.02E-05 | 0.0332 | GGAGGTGGGGCT |
| PCGF2 | hTFtarget | 1721 | 1742 | - | 13.6184 | 1.02E-05 | 0.0177 | TCCCTCAGGCTTCCCCCATGCC |
| SPI1 | hTFtarget | 1913 | 1928 | - | 13.5 | 1.02E-05 | 0.019 | ACCAGCCCCACCTCCT |
| SPI1 | hTFtarget | 1913 | 1924 | + | 13.9342 | 1.02E-05 | 0.0304 | AGGAGGTGGGGC |
| STAT2 | hTFtarget | 128 | 139 | - | 13.7286 | 1.02E-05 | 0.0155 | GGTGGGTGGGGG |
| TFAP2C | hTFtarget | 1708 | 1719 | + | 13.9848 | 1.02E-05 | 0.0198 | TGCCTAAGGCCA |
| YY1 | hTFtarget | 1653 | 1668 | + | 13.0455 | 1.02E-05 | 0.0393 | CCAGGATGGCAGCCTG |
| ZNF274 | hTFtarget | 854 | 865 | + | 13.6143 | 1.02E-05 | 0.0406 | AAATCTCTTATG |
| CEBPB | hTFtarget | 788 | 801 | + | 14.197 | 1.02E-05 | 0.0406 | GATTGCGCCACTGC |
| PURA | database | 123 | 139 | + | 13.5248 | 1.02E-05 | 0.0128 | CCTGTCCCCCACCCACC |
| REST | hTFtarget | 656 | 671 | + | 10.3333 | 1.03E-05 | 0.0187 | CTGGCCAACGTGGTGA |
| REST | hTFtarget | 1567 | 1582 | + | 10.3333 | 1.03E-05 | 0.0187 | TTGGCCAAAGTGCTGG |
| SPI1 | hTFtarget | 1913 | 1928 | - | 13.3286 | 1.03E-05 | 0.0387 | ACCAGCCCCACCTCCT |
| SPI1 | hTFtarget | 760 | 775 | - | 13.9286 | 1.03E-05 | 0.0193 | AACCTCCGCCTCCCGG |
| SPI1 | hTFtarget | 761 | 776 | + | 13.6429 | 1.03E-05 | 0.0195 | CGGGAGGCGGAGGTTG |
| ZNF384 | hTFtarget | 758 | 773 | + | 13.5921 | 1.03E-05 | 0.025 | ACCCGGGAGGCGGAGG |
| GABPA | hTFtarget | 417 | 428 | - | 13.9242 | 1.04E-05 | 0.0408 | TAGAGGAAGTGA |
| SPI1 | hTFtarget | 1913 | 1924 | + | 13.9143 | 1.04E-05 | 0.0267 | AGGAGGTGGGGC |
| ZNF143 | hTFtarget | 1427 | 1442 | - | 13.4211 | 1.04E-05 | 0.0181 | GTGATGCCTGCTGGCA |
| HIF1A | hTFtarget | 810 | 828 | + | 11.8289 | 1.05E-05 | 0.0197 | CTGGGTGACAGAGTGAGAC |
| NRF1 | hTFtarget | 761 | 772 | - | 13.7 | 1.05E-05 | 0.0208 | CTCCGCCTCCCG |
| POLR2A | hTFtarget | 763 | 777 | + | 13.3429 | 1.05E-05 | 0.0389 | GGAGGCGGAGGTTGC |
| RB1 | hTFtarget | 1557 | 1570 | + | 14.2424 | 1.05E-05 | 0.0371 | TCCTCCCGCCTTGG |
| BRD4 | hTFtarget | 1032 | 1053 | - | 13.4286 | 1.05E-05 | 0.0164 | CCCTGCCTTCTGTTCTTCACTC |
| SP1 | hTFtarget | 1913 | 1924 | - | 13.8026 | 1.05E-05 | 0.0391 | GCCCCACCTCCT |
| TAF1 | hTFtarget | 609 | 620 | - | 13.2632 | 1.05E-05 | 0.0385 | CGCCTCAGCCTC |
| TP53 | hTFtarget | 466 | 477 | - | 13.8816 | 1.05E-05 | 0.041 | CAGAGAAGGGAA |
| NR5A1 | database | 1254 | 1262 | - | 13.6579 | 1.06E-05 | 0.0415 | TCAAGGCCA |
| TP63 | database | 1589 | 1608 | + | 13.7308 | 1.06E-05 | 0.0417 | AGGCATGAGCCACCATGCCC |
| HNF1A | database | 1170 | 1184 | + | 13.7444 | 1.06E-05 | 0.021 | AGTTAATGGTTGACA |
| SF1 | database | 1254 | 1262 | + | 13.2472 | 1.06E-05 | 0.0421 | TGGCCTTGA |
| KLF5 | hTFtarget | 352 | 360 | + | 14.5789 | 1.06E-05 | 0.0423 | CTGGAATGC |
| POU2F1 | hTFtarget | 608 | 623 | + | 13.2632 | 1.06E-05 | 0.0372 | GGAGGCTGAGGCGGGC |
| CREBBP | hTFtarget | 1737 | 1757 | + | -4.82857 | 1.06E-05 | 0.0374 | GAGGGATGCTGAGGAGCACAG |
| BCL11A | database | 414 | 428 | - | 13.7143 | 1.06E-05 | 0.041 | TAGAGGAAGTGAGGT |
| NR5A1 | database | 1254 | 1262 | + | 13.6327 | 1.06E-05 | 0.0413 | TGGCCTTGA |
| HOXA1 | database | 951 | 960 | + | 14.5138 | 1.07E-05 | 0.0423 | TGGATTGATG |
| THRB | database | 1417 | 1426 | - | 13.5976 | 1.07E-05 | 0.0414 | CCTGAGGTCA |
| ETV7 | hTFtarget | 53 | 74 | + | 12.5263 | 1.07E-05 | 0.0404 | AGTACACGGGAAACGGTAGTCC |
| NFYA | hTFtarget | 762 | 773 | + | 14.0263 | 1.07E-05 | 0.0204 | GGGAGGCGGAGG |
| RUNX1 | hTFtarget | 417 | 428 | + | 13.2143 | 1.07E-05 | 0.0415 | TCACTTCCTCTA |
| RXRA | hTFtarget | 1417 | 1428 | + | 13.3 | 1.07E-05 | 0.0417 | TGACCTCAGGTG |
| BRD4 | hTFtarget | 418 | 429 | + | 13.5789 | 1.07E-05 | 0.0399 | CACTTCCTCTAG |
| SPI1 | hTFtarget | 1913 | 1924 | + | 13.8714 | 1.07E-05 | 0.0411 | AGGAGGTGGGGC |
| TAF1 | hTFtarget | 607 | 622 | - | 13 | 1.07E-05 | 0.0406 | CCCGCCTCAGCCTCCC |
| TBP | hTFtarget | 1914 | 1925 | - | 13.2632 | 1.07E-05 | 0.04 | AGCCCCACCTCC |
| CEBPB | hTFtarget | 788 | 799 | - | 14.1818 | 1.07E-05 | 0.0426 | AGTGGCGCAATC |
| CIITA | hTFtarget | 719 | 734 | + | 13.5909 | 1.07E-05 | 0.0413 | CCCAGCTACTCGTGAG |
| HOXA1 | database | 951 | 960 | - | 14.5714 | 1.07E-05 | 0.0424 | CATCAATCCA |
| THRB | database | 1417 | 1426 | + | 13.5758 | 1.07E-05 | 0.0414 | TGACCTCAGG |
| FOXO3 | database | 1480 | 1491 | - | 13.5982 | 1.08E-05 | 0.0428 | TATAAATAAATA |
| SIN3A | hTFtarget | 1127 | 1146 | - | 8.63158 | 1.08E-05 | 0.0397 | TCTGCACCACTGACGGCTTA |
| SPI1 | hTFtarget | 1914 | 1925 | - | 13.7105 | 1.08E-05 | 0.0416 | AGCCCCACCTCC |
| CBFB | hTFtarget | 417 | 428 | - | 13.5857 | 1.08E-05 | 0.0224 | TAGAGGAAGTGA |
| PGR | hTFtarget | 115 | 130 | - | 12.6806 | 1.09E-05 | 0.0414 | GGGACAGGCTGAACAC |
| SP1 | hTFtarget | 415 | 430 | - | 12.0921 | 1.09E-05 | 0.0424 | CCTAGAGGAAGTGAGG |
| SPI1 | hTFtarget | 1985 | 2000 | + | 13.7286 | 1.09E-05 | 0.0258 | TCGTTGTCCCTCCCCT |
| SPI1 | hTFtarget | 763 | 778 | - | 13.6316 | 1.09E-05 | 0.0411 | TGCAACCTCCGCCTCC |
| TFAP2C | hTFtarget | 1360 | 1371 | + | 13.9242 | 1.09E-05 | 0.0198 | GGCCGGAGGGCA |
| ZNF143 | hTFtarget | 1363 | 1379 | - | 12.7632 | 1.09E-05 | 0.0416 | TACCAGGGTGCCCTCCG |
| MAFB | hTFtarget | 611 | 622 | - | 13.2368 | 1.10E-05 | 0.0409 | CCCGCCTCAGCC |
| MED1 | hTFtarget | 838 | 849 | + | 13.6842 | 1.10E-05 | 0.0435 | AAAAAAAGAAGT |
| RELA | hTFtarget | 415 | 426 | + | 13.8947 | 1.10E-05 | 0.0391 | CCTCACTTCCTC |
| SP1 | hTFtarget | 1914 | 1925 | - | 13.9342 | 1.10E-05 | 0.0414 | AGCCCCACCTCC |
| SPI1 | hTFtarget | 762 | 773 | + | 13.9857 | 1.10E-05 | 0.0206 | GGGAGGCGGAGG |
| STAT1 | hTFtarget | 369 | 380 | - | 13.5395 | 1.10E-05 | 0.0352 | GAAGGGGAAGGA |
| ZNF76 | hTFtarget | 1418 | 1437 | + | 11.4082 | 1.10E-05 | 0.0417 | GACCTCAGGTGCCAGCAGGC |
| CEBPE | database | 786 | 797 | - | 12.9194 | 1.11E-05 | 0.0444 | TGGCGCAATCTT |
| GATA1 | hTFtarget | 1039 | 1058 | + | 13.0513 | 1.11E-05 | 0.0297 | GAACAGAAGGCAGGGGGCCA |
| PPARG | hTFtarget | 546 | 561 | + | 13.3134 | 1.11E-05 | 0.0422 | TCCCCTCTCCTCCAGA |
| RUNX1 | hTFtarget | 1335 | 1346 | + | 13.7105 | 1.11E-05 | 0.0212 | CTCAGGATGTGG |
| SPI1 | hTFtarget | 1913 | 1928 | - | 13.5921 | 1.11E-05 | 0.0415 | ACCAGCCCCACCTCCT |
| TBP | hTFtarget | 1915 | 1926 | + | 13.2368 | 1.11E-05 | 0.0399 | GAGGTGGGGCTG |
| CEBPB | hTFtarget | 786 | 801 | - | 14.2273 | 1.11E-05 | 0.044 | GCAGTGGCGCAATCTT |
| E2F4 | hTFtarget | 762 | 773 | + | 13.9079 | 1.11E-05 | 0.0301 | GGGAGGCGGAGG |
| E2F1 | hTFtarget | 1558 | 1566 | - | 14.8158 | 1.12E-05 | 0.0399 | GGCGGGAGG |
| HNF4A | hTFtarget | 1971 | 1982 | + | 13.4429 | 1.12E-05 | 0.0216 | CTCTGGCCCTGG |
| MAX | hTFtarget | 395 | 410 | - | 13.6104 | 1.12E-05 | 0.0296 | AGTGGAGAAGTAAAAG |
| REST | hTFtarget | 1565 | 1583 | - | 6.56061 | 1.12E-05 | 0.0428 | CCCAGCACTTTGGCCAAGG |
| SMAD1 | hTFtarget | 472 | 487 | - | 13.6711 | 1.12E-05 | 0.0243 | TGAGAGAGTCCAGAGA |
| SP2 | hTFtarget | 730 | 751 | - | 12.8571 | 1.12E-05 | 0.014 | GATTCTTCTGCCTCAGCCTCAC |
| SPI1 | hTFtarget | 762 | 773 | + | 13.8816 | 1.12E-05 | 0.0416 | GGGAGGCGGAGG |
| SPI1 | hTFtarget | 1913 | 1924 | - | 13.3947 | 1.12E-05 | 0.0426 | GCCCCACCTCCT |
| STAT3 | hTFtarget | 345 | 353 | - | 13.5921 | 1.12E-05 | 0.0253 | AGGGAGGAG |
| TAF1 | hTFtarget | 1654 | 1665 | + | 13.4211 | 1.12E-05 | 0.0442 | CAGGATGGCAGC |
| TRIM28 | hTFtarget | 1628 | 1643 | - | 13.0132 | 1.12E-05 | 0.021 | CTAGCTCCCAGCCTCT |
| YY1 | hTFtarget | 1653 | 1665 | + | 13.0152 | 1.12E-05 | 0.044 | CCAGGATGGCAGC |
| E2F1 | hTFtarget | 1558 | 1566 | - | 14.8158 | 1.12E-05 | 0.0397 | GGCGGGAGG |
| CEBPE | database | 786 | 797 | + | 12.8384 | 1.12E-05 | 0.0446 | AAGATTGCGCCA |
| AR | hTFtarget | 1 | 21 | - | 13.3247 | 1.13E-05 | 0.0299 | TGTATTACTTTGTTTGATCTT |
| GABPA | hTFtarget | 1914 | 1925 | - | 13.0395 | 1.13E-05 | 0.041 | AGCCCCACCTCC |
| ASCL1 | hTFtarget | 1908 | 1919 | + | 13.6197 | 1.13E-05 | 0.0144 | GTGGGAGGAGGT |
| REST | hTFtarget | 656 | 671 | + | 8.54545 | 1.13E-05 | 0.0216 | CTGGCCAACGTGGTGA |
| RUNX1 | hTFtarget | 416 | 427 | + | 13.8158 | 1.13E-05 | 0.0221 | CTCACTTCCTCT |
| SPI1 | hTFtarget | 1330 | 1341 | + | 13.7895 | 1.13E-05 | 0.0445 | AGCCACTCAGGA |
| SPI1 | hTFtarget | 761 | 782 | - | 13.0143 | 1.13E-05 | 0.0264 | TCACTGCAACCTCCGCCTCCCG |
| SPI1 | hTFtarget | 1913 | 1924 | + | 13.9143 | 1.13E-05 | 0.0289 | AGGAGGTGGGGC |
| SPI1 | hTFtarget | 1808 | 1819 | - | 13.7763 | 1.13E-05 | 0.0217 | GAGGAAGAGAGG |
| TCF3 | hTFtarget | 894 | 905 | + | 13.9394 | 1.13E-05 | 0.0419 | CCACCTGCACCC |
| TFAP2A | hTFtarget | 1356 | 1371 | + | 13.8333 | 1.13E-05 | 0.0417 | AAGTGGCCGGAGGGCA |
| AR | hTFtarget | 1474 | 1490 | - | 13.507 | 1.13E-05 | 0.0448 | ATAAATAAATAAACACA |
| ETV6 | database | 418 | 427 | - | 13.9184 | 1.13E-05 | 0.0442 | AGAGGAAGTG |
| SOX2 | database | 1460 | 1475 | - | 13.403 | 1.14E-05 | 0.0452 | CATTAGATGACAATGG |
| IRF3 | hTFtarget | 274 | 285 | - | 13.6974 | 1.14E-05 | 0.0215 | GGAGGCAGGACT |
| NANOG | hTFtarget | 1459 | 1470 | - | 13.3056 | 1.14E-05 | 0.0455 | GATGACAATGGG |
| RELA | hTFtarget | 415 | 426 | - | 13.6184 | 1.14E-05 | 0.0447 | GAGGAAGTGAGG |
| SP2 | hTFtarget | 1913 | 1928 | - | 13.4605 | 1.14E-05 | 0.0373 | ACCAGCCCCACCTCCT |
| SPI1 | hTFtarget | 762 | 779 | + | 13.4342 | 1.14E-05 | 0.0424 | GGGAGGCGGAGGTTGCAG |
| SPI1 | hTFtarget | 418 | 429 | - | 13.6 | 1.14E-05 | 0.0446 | CTAGAGGAAGTG |
| AR | hTFtarget | 1188 | 1199 | + | 13.2639 | 1.14E-05 | 0.0452 | TCTGTTTACCTT |
| CEBPA | hTFtarget | 788 | 798 | + | 13.9848 | 1.14E-05 | 0.0453 | GATTGCGCCAC |
| SOX2 | database | 1460 | 1475 | - | 13.3861 | 1.14E-05 | 0.0454 | CATTAGATGACAATGG |
| ESR1 | hTFtarget | 1358 | 1381 | - | 13.1711 | 1.15E-05 | 0.0369 | AGTACCAGGGTGCCCTCCGGCCAC |
| FLI1 | hTFtarget | 998 | 1013 | - | 13.1343 | 1.15E-05 | 0.0424 | AGAAAGGGAGCCAGGG |
| HNF4A | hTFtarget | 796 | 811 | - | 13.4355 | 1.15E-05 | 0.022 | AGGCTAGAGTGCAGTG |
| TAF1 | hTFtarget | 766 | 781 | + | 12.9868 | 1.15E-05 | 0.043 | GGCGGAGGTTGCAGTG |
| CDK7 | hTFtarget | 758 | 773 | - | 13.0789 | 1.15E-05 | 0.0361 | CCTCCGCCTCCCGGGT |
| CEBPB | hTFtarget | 788 | 799 | + | 13.8333 | 1.15E-05 | 0.0456 | GATTGCGCCACT |
| ESR1 | hTFtarget | 1189 | 1199 | - | 13.2468 | 1.16E-05 | 0.0462 | AAGGTAAACAG |
| FLI1 | hTFtarget | 415 | 430 | + | 13.5 | 1.16E-05 | 0.045 | CCTCACTTCCTCTAGG |
| IRF4 | hTFtarget | 413 | 428 | - | 13.2368 | 1.16E-05 | 0.0448 | TAGAGGAAGTGAGGTT |
| BARX2 | hTFtarget | 762 | 773 | + | 13.8143 | 1.16E-05 | 0.0214 | GGGAGGCGGAGG |
| PGR | hTFtarget | 115 | 130 | + | 12.8955 | 1.16E-05 | 0.0443 | GTGTTCAGCCTGTCCC |
| SPIB | hTFtarget | 416 | 431 | + | 12.6061 | 1.16E-05 | 0.0445 | CTCACTTCCTCTAGGA |
| STAT2 | hTFtarget | 762 | 773 | + | 13.6143 | 1.16E-05 | 0.0155 | GGGAGGCGGAGG |
| YY1 | hTFtarget | 763 | 778 | + | 12.8553 | 1.16E-05 | 0.0215 | GGAGGCGGAGGTTGCA |
| KDM5B | hTFtarget | 1358 | 1382 | - | 11.4286 | 1.17E-05 | 0.0414 | CAGTACCAGGGTGCCCTCCGGCCAC |
| RBL2 | hTFtarget | 1558 | 1566 | - | 13.9868 | 1.17E-05 | 0.0433 | GGCGGGAGG |
| RBL2 | hTFtarget | 1558 | 1566 | - | 14.25 | 1.17E-05 | 0.0406 | GGCGGGAGG |
| REST | hTFtarget | 656 | 671 | + | 8.13636 | 1.17E-05 | 0.0226 | CTGGCCAACGTGGTGA |
| TCF12 | hTFtarget | 99 | 107 | + | 14.4211 | 1.17E-05 | 0.0204 | CTCAGCGGG |
| ZNF274 | hTFtarget | 1384 | 1399 | + | 8.82857 | 1.17E-05 | 0.0459 | CATATGGGTGGGAAGC |
| CREBBP | hTFtarget | 1365 | 1380 | - | 13.3571 | 1.17E-05 | 0.0373 | GTACCAGGGTGCCCTC |
| EP300 | hTFtarget | 1654 | 1669 | - | 13.1711 | 1.17E-05 | 0.0459 | ACAGGCTGCCATCCTG |
| TFAP2C | database | 1733 | 1741 | + | 14.0323 | 1.18E-05 | 0.0447 | GCCTGAGGG |
| HNF4A | hTFtarget | 1569 | 1580 | + | 13.5857 | 1.18E-05 | 0.046 | GGCCAAAGTGCT |
| MAX | hTFtarget | 762 | 773 | - | 13.4342 | 1.18E-05 | 0.0439 | CCTCCGCCTCCC |
| SP2 | hTFtarget | 762 | 775 | - | 13.8143 | 1.18E-05 | 0.0225 | AACCTCCGCCTCCC |
| SPI1 | hTFtarget | 1913 | 1928 | + | 13.5263 | 1.18E-05 | 0.0443 | AGGAGGTGGGGCTGGT |
| TP53 | hTFtarget | 1806 | 1821 | - | 13 | 1.18E-05 | 0.0441 | CAGAGGAAGAGAGGCA |
| USF1 | hTFtarget | 1513 | 1536 | + | 2.67143 | 1.18E-05 | 0.0456 | TACTATGTTGCCCAGGCTGGTCTC |
| ZBTB33 | hTFtarget | 763 | 778 | - | 12.8421 | 1.18E-05 | 0.0216 | TGCAACCTCCGCCTCC |
| TFAP2C | database | 1733 | 1741 | + | 14.0204 | 1.18E-05 | 0.0437 | GCCTGAGGG |
| ESR1 | hTFtarget | 536 | 551 | + | 13.3 | 1.19E-05 | 0.0456 | TGGGTCTTGGTCCCCT |
| GMEB2 | hTFtarget | 1416 | 1437 | + | 13.2381 | 1.19E-05 | 0.0468 | TTGACCTCAGGTGCCAGCAGGC |
| KLF5 | hTFtarget | 762 | 773 | + | 13.5658 | 1.19E-05 | 0.0169 | GGGAGGCGGAGG |
| MYH11 | hTFtarget | 418 | 429 | - | 13.6447 | 1.19E-05 | 0.0463 | CTAGAGGAAGTG |
| POLR2A | hTFtarget | 766 | 780 | + | 12.7368 | 1.19E-05 | 0.0209 | GGCGGAGGTTGCAGT |
| TFAP4 | hTFtarget | 1476 | 1485 | - | 13.1818 | 1.19E-05 | 0.0474 | TAAATAAACA |
| CEBPB | hTFtarget | 788 | 799 | + | 14.0455 | 1.19E-05 | 0.0475 | GATTGCGCCACT |
| E2F1 | hTFtarget | 1557 | 1569 | + | 14.1429 | 1.19E-05 | 0.0413 | TCCTCCCGCCTTG |
| FOS | hTFtarget | 275 | 286 | - | 13.7237 | 1.20E-05 | 0.0206 | AGGAGGCAGGAC |
| MYC | hTFtarget | 766 | 781 | - | 12.1316 | 1.20E-05 | 0.0394 | CACTGCAACCTCCGCC |
| RB1 | hTFtarget | 1559 | 1570 | - | 13.5658 | 1.20E-05 | 0.0452 | CCAAGGCGGGAG |
| SIX5 | hTFtarget | 975 | 996 | + | 10.9737 | 1.20E-05 | 0.0462 | GGTTTGGCTAAGGGAAGCTGAG |
| SPI1 | hTFtarget | 1913 | 1928 | - | 13.4714 | 1.20E-05 | 0.0223 | ACCAGCCCCACCTCCT |
| SPI1 | hTFtarget | 273 | 287 | - | 13.6053 | 1.20E-05 | 0.0231 | AAGGAGGCAGGACTG |
| SPI1 | hTFtarget | 763 | 778 | + | 13.4143 | 1.20E-05 | 0.035 | GGAGGCGGAGGTTGCA |
| IKZF1 | database | 605 | 612 | + | 12.1341 | 1.21E-05 | 0.0466 | TTGGGAGG |
| E2F1 | database | 60 | 67 | - | 11.4648 | 1.21E-05 | 0.0475 | CGTTTCCC |
| PDX1 | database | 1892 | 1903 | - | 12.7013 | 1.21E-05 | 0.048 | AATCATTAAACA |
| ESR1 | hTFtarget | 1851 | 1859 | - | 13.6479 | 1.21E-05 | 0.0462 | AGAGACAGA |
| OTX2 | hTFtarget | 99 | 107 | + | 14.0526 | 1.21E-05 | 0.0223 | CTCAGCGGG |
| PAX6 | hTFtarget | 99 | 107 | - | 13.9342 | 1.21E-05 | 0.0228 | CCCGCTGAG |
| T | hTFtarget | 1108 | 1122 | + | 13.5909 | 1.21E-05 | 0.0327 | ACACAGCAGGGTCTT |
| VEZF1 | hTFtarget | 1720 | 1741 | - | 12.5429 | 1.21E-05 | 0.0137 | CCCTCAGGCTTCCCCCATGCCC |
| EP300 | hTFtarget | 472 | 487 | - | 12.8286 | 1.21E-05 | 0.0474 | TGAGAGAGTCCAGAGA |
| ERG | hTFtarget | 1072 | 1096 | + | -15.0921 | 1.21E-05 | 0.0141 | CTTCCCTTGTTTCTCCACTGCCATT |
| IKZF4 | database | 605 | 612 | + | 12.102 | 1.21E-05 | 0.0466 | TTGGGAGG |
| ZNF691 | database | 1748 | 1755 | + | 13.1735 | 1.21E-05 | 0.0472 | AGGAGCAC |
| TFAP2A | database | 1733 | 1741 | + | 14.0517 | 1.22E-05 | 0.0444 | GCCTGAGGG |
| ESR1 | hTFtarget | 59 | 74 | - | 11.5658 | 1.22E-05 | 0.0231 | GGACTACCGTTTCCCG |
| FOXA1 | hTFtarget | 1186 | 1201 | + | 13.8939 | 1.22E-05 | 0.0485 | TCTCTGTTTACCTTAA |
| GTF3C2 | hTFtarget | 1510 | 1525 | - | 13.4079 | 1.22E-05 | 0.0158 | GGGCAACATAGTAAGA |
| ORC1 | hTFtarget | 1909 | 1924 | - | 12.3286 | 1.22E-05 | 0.0435 | GCCCCACCTCCTCCCA |
| RELA | hTFtarget | 760 | 775 | + | 11.1286 | 1.22E-05 | 0.0359 | CCGGGAGGCGGAGGTT |
| RUNX1 | hTFtarget | 837 | 851 | - | 13.6053 | 1.22E-05 | 0.0469 | CAACTTCTTTTTTTT |
| RXRA | hTFtarget | 545 | 562 | - | 13.3026 | 1.22E-05 | 0.0459 | TTCTGGAGGAGAGGGGAC |
| SP1 | hTFtarget | 1913 | 1924 | + | 13.4857 | 1.22E-05 | 0.0467 | AGGAGGTGGGGC |
| SPI1 | hTFtarget | 1913 | 1924 | + | 13.5921 | 1.22E-05 | 0.0461 | AGGAGGTGGGGC |
| C17orf96 | hTFtarget | 369 | 393 | - | 13.3038 | 1.22E-05 | 0.0401 | CAGGTAGGAGCTGGAAGGGGAAGGA |
| STAT2 | hTFtarget | 1913 | 1924 | + | 13.5571 | 1.22E-05 | 0.0155 | AGGAGGTGGGGC |
| TEAD4 | hTFtarget | 352 | 360 | - | 13.9474 | 1.22E-05 | 0.0488 | GCATTCCAG |
| AR | hTFtarget | 119 | 130 | + | 13.0714 | 1.22E-05 | 0.0239 | TCAGCCTGTCCC |
| EP300 | hTFtarget | 128 | 136 | + | 14.0263 | 1.22E-05 | 0.0456 | CCCCCACCC |
| TFAP2A | database | 1733 | 1741 | - | 14.0101 | 1.22E-05 | 0.0441 | CCCTCAGGC |
| GTF2I | hTFtarget | 252 | 273 | + | 12.5789 | 1.23E-05 | 0.0193 | TTCCTCCACAGCCCCTCAACAC |
| GTF2I | hTFtarget | 988 | 1003 | - | 13.2571 | 1.23E-05 | 0.0154 | CCAGGGCCTCAGCTTC |
| EWSR1 | hTFtarget | 1036 | 1055 | + | 9.20161 | 1.23E-05 | 0.02 | GAAGAACAGAAGGCAGGGGG |
| NFE2 | hTFtarget | 794 | 815 | + | 13.4103 | 1.23E-05 | 0.0459 | GCCACTGCACTCTAGCCTGGGT |
| RBL2 | hTFtarget | 1557 | 1568 | - | 13.9545 | 1.23E-05 | 0.0442 | AAGGCGGGAGGA |
| SMAD1 | hTFtarget | 1921 | 1936 | - | 13.5526 | 1.23E-05 | 0.0243 | AAACATTAACCAGCCC |
| SPI1 | hTFtarget | 1914 | 1925 | + | 13.7237 | 1.23E-05 | 0.0471 | GGAGGTGGGGCT |
| SPI1 | hTFtarget | 1985 | 2000 | - | 13.3429 | 1.23E-05 | 0.0198 | AGGGGAGGGACAACGA |
| TAF1 | hTFtarget | 767 | 782 | + | 12.5921 | 1.23E-05 | 0.0182 | GCGGAGGTTGCAGTGA |
| ZNF274 | hTFtarget | 854 | 865 | + | 13.2429 | 1.23E-05 | 0.0488 | AAATCTCTTATG |
| KLF1 | database | 128 | 138 | - | 13.7982 | 1.24E-05 | 0.0457 | GTGGGTGGGGG |
| HNF1B | database | 1172 | 1183 | + | 13.9099 | 1.24E-05 | 0.0494 | TTAATGGTTGAC |
| HNF1B | database | 1172 | 1183 | + | 13.9099 | 1.24E-05 | 0.0494 | TTAATGGTTGAC |
| EZH2 | hTFtarget | 466 | 477 | - | 13.4789 | 1.24E-05 | 0.0492 | CAGAGAAGGGAA |
| GTF3C2 | hTFtarget | 1730 | 1751 | - | 12.7831 | 1.24E-05 | 0.0138 | TCCTCAGCATCCCTCAGGCTTC |
| MAZ | hTFtarget | 121 | 136 | + | 13.303 | 1.24E-05 | 0.023 | AGCCTGTCCCCCACCC |
| SPI1 | hTFtarget | 1908 | 1923 | + | 13.6 | 1.24E-05 | 0.021 | GTGGGAGGAGGTGGGG |
| KLF1 | database | 128 | 138 | - | 13.8163 | 1.24E-05 | 0.0453 | GTGGGTGGGGG |
| SOX17 | database | 1345 | 1362 | + | 11.9878 | 1.25E-05 | 0.0497 | GGACAATAAGCAAGTGGC |
| ETS1 | hTFtarget | 1912 | 1927 | - | 13.1829 | 1.25E-05 | 0.0465 | CCAGCCCCACCTCCTC |
| POLR2A | hTFtarget | 608 | 623 | - | 12.8289 | 1.25E-05 | 0.0156 | GCCCGCCTCAGCCTCC |
| SIX5 | hTFtarget | 966 | 988 | + | 13.1039 | 1.25E-05 | 0.0472 | ATATGCCCAGGTTTGGCTAAGGG |
| SOX2 | hTFtarget | 59 | 74 | + | 11.6711 | 1.25E-05 | 0.0491 | CGGGAAACGGTAGTCC |
| SP1 | hTFtarget | 1913 | 1928 | + | 12.5303 | 1.25E-05 | 0.0465 | AGGAGGTGGGGCTGGT |
| SPI1 | hTFtarget | 1906 | 1929 | + | 12.9079 | 1.25E-05 | 0.0452 | ATGTGGGAGGAGGTGGGGCTGGTT |
| ATF3 | database | 1832 | 1840 | + | 11.7755 | 1.26E-05 | 0.0496 | GTGACTCCA |
| THAP1 | database | 1690 | 1698 | + | 11.2368 | 1.26E-05 | 0.0494 | TTGCCCGCA |
| PURA | database | 1971 | 1979 | - | 11.3486 | 1.26E-05 | 0.0477 | GGGCCAGAG |
| IRF4 | hTFtarget | 418 | 429 | + | 13.6463 | 1.26E-05 | 0.0495 | CACTTCCTCTAG |
| MED1 | hTFtarget | 1816 | 1824 | + | 13.4868 | 1.26E-05 | 0.0487 | CCTCTGGGA |
| RXRA | hTFtarget | 1810 | 1821 | + | 13.6316 | 1.26E-05 | 0.0247 | TCTCTTCCTCTG |
| ZNF92 | hTFtarget | 313 | 328 | - | 8.21429 | 1.26E-05 | 0.0497 | GGCACAGAGTAGGAAC |
| ATF3 | database | 1832 | 1840 | + | 11.7615 | 1.26E-05 | 0.0498 | GTGACTCCA |
| FOXP1 | database | 1473 | 1487 | - | 13.7465 | 1.27E-05 | 0.0251 | AATAAATAAACACAT |
| GLYR1 | hTFtarget | 366 | 387 | + | 7.05263 | 1.27E-05 | 0.0124 | CGGTCCTTCCCCTTCCAGCTCC |
| HCFC1 | hTFtarget | 759 | 775 | - | 10.2879 | 1.27E-05 | 0.049 | AACCTCCGCCTCCCGGG |
| RUNX2 | hTFtarget | 1279 | 1294 | - | 13.2121 | 1.27E-05 | 0.0499 | AACCCTAAAACCTCAG |
| SPI1 | hTFtarget | 122 | 139 | + | 13.1053 | 1.27E-05 | 0.0266 | GCCTGTCCCCCACCCACC |
| SPI1 | hTFtarget | 1914 | 1925 | + | 13.4342 | 1.27E-05 | 0.0473 | GGAGGTGGGGCT |
| FOXP1 | database | 1473 | 1487 | - | 13.74 | 1.27E-05 | 0.0252 | AATAAATAAACACAT |
| PLAGL1 | database | 1049 | 1058 | + | 13.789 | 1.28E-05 | 0.0478 | CAGGGGGCCA |
| ETS1 | hTFtarget | 751 | 775 | + | 5.82857 | 1.28E-05 | 0.047 | CGCTTGAACCCGGGAGGCGGAGGTT |
| SPI1 | hTFtarget | 763 | 778 | + | 13.5571 | 1.28E-05 | 0.021 | GGAGGCGGAGGTTGCA |
| SPI1 | hTFtarget | 762 | 773 | + | 13.8816 | 1.28E-05 | 0.0453 | GGGAGGCGGAGG |
| TFAP2A | hTFtarget | 1705 | 1720 | - | 13.6212 | 1.28E-05 | 0.0341 | CTGGCCTTAGGCAGAT |
| PLAGL1 | database | 1049 | 1058 | + | 13.8061 | 1.28E-05 | 0.0474 | CAGGGGGCCA |
| AR | hTFtarget | 1 | 21 | - | 12.7324 | 1.29E-05 | 0.0323 | TGTATTACTTTGTTTGATCTT |
| GTF3C2 | hTFtarget | 747 | 758 | + | 12.6053 | 1.29E-05 | 0.0171 | GAATCGCTTGAA |
| RFX2 | hTFtarget | 1913 | 1924 | + | 13.1053 | 1.29E-05 | 0.0324 | AGGAGGTGGGGC |
| SPI1 | hTFtarget | 371 | 386 | + | 13.5263 | 1.29E-05 | 0.0474 | CTTCCCCTTCCAGCTC |
| TP53 | hTFtarget | 1806 | 1821 | - | 13.0147 | 1.29E-05 | 0.0484 | CAGAGGAAGAGAGGCA |
| TLX1:NFIC | database | 774 | 787 | + | 10.0714 | 1.30E-05 | 0.0499 | TTGCAGTGAGCCAA |
| EWSR1 | hTFtarget | 1040 | 1059 | + | 9.08871 | 1.30E-05 | 0.02 | AACAGAAGGCAGGGGGCCAG |
| SPI1 | hTFtarget | 1985 | 2000 | + | 13.4474 | 1.30E-05 | 0.0381 | TCGTTGTCCCTCCCCT |
| SPI1 | hTFtarget | 762 | 777 | - | 13.5286 | 1.30E-05 | 0.0245 | GCAACCTCCGCCTCCC |
| BTAF1 | hTFtarget | 1910 | 1921 | + | 13.7237 | 1.30E-05 | 0.017 | GGGAGGAGGTGG |
| SPI1 | hTFtarget | 1985 | 2000 | - | 13.2 | 1.30E-05 | 0.0343 | AGGGGAGGGACAACGA |
| SPI1 | hTFtarget | 1913 | 1924 | - | 13.5263 | 1.30E-05 | 0.0495 | GCCCCACCTCCT |
| SPI1 | hTFtarget | 1913 | 1928 | - | 13.3714 | 1.30E-05 | 0.0304 | ACCAGCCCCACCTCCT |
| OTX2 | database | 1297 | 1311 | + | 13.3077 | 1.31E-05 | 0.0223 | GGGATAGGATTAGAA |
| SPI1 | hTFtarget | 1913 | 1928 | + | 13.3571 | 1.31E-05 | 0.0248 | AGGAGGTGGGGCTGGT |
| SPI1 | hTFtarget | 415 | 430 | - | 12.0606 | 1.31E-05 | 0.0496 | CCTAGAGGAAGTGAGG |
| AR | hTFtarget | 6 | 21 | - | 13.3182 | 1.31E-05 | 0.0372 | TGTATTACTTTGTTTG |
| FLI1 | hTFtarget | 376 | 391 | + | 13.2237 | 1.32E-05 | 0.043 | CCTTCCAGCTCCTACC |
| PAX5 | hTFtarget | 415 | 430 | + | 13.119 | 1.32E-05 | 0.0478 | CCTCACTTCCTCTAGG |
| SPI1 | hTFtarget | 763 | 778 | + | 13.3286 | 1.32E-05 | 0.0286 | GGAGGCGGAGGTTGCA |
| SP1 | database | 763 | 773 | - | 13.8269 | 1.33E-05 | 0.0165 | CCTCCGCCTCC |
| FOXA1 | hTFtarget | 1473 | 1488 | - | 12.6567 | 1.33E-05 | 0.0263 | AAATAAATAAACACAT |
| EWSR1 | hTFtarget | 1031 | 1049 | + | 2.12121 | 1.33E-05 | 0.0469 | GGAGTGAAGAACAGAAGGC |
| HNF4A | hTFtarget | 1565 | 1580 | - | 13.2195 | 1.33E-05 | 0.0256 | AGCACTTTGGCCAAGG |
| RAC3 | hTFtarget | 537 | 551 | + | 13.3 | 1.33E-05 | 0.0302 | GGGTCTTGGTCCCCT |
| SPI1 | hTFtarget | 763 | 778 | + | 13.2143 | 1.33E-05 | 0.0198 | GGAGGCGGAGGTTGCA |
| YY1 | hTFtarget | 758 | 779 | - | 10.7368 | 1.33E-05 | 0.0299 | CTGCAACCTCCGCCTCCCGGGT |
| OTX2 | database | 1297 | 1311 | - | 13.3 | 1.33E-05 | 0.0223 | TTCTAATCCTATCCC |
| GTF2I | hTFtarget | 317 | 328 | + | 13.2763 | 1.34E-05 | 0.0451 | CTACTCTGTGCC |
| MYOD1 | hTFtarget | 242 | 250 | - | 13.6447 | 1.34E-05 | 0.0266 | CTGTCAGTC |
| BTAF1 | hTFtarget | 607 | 618 | + | 13.6842 | 1.34E-05 | 0.017 | GGGAGGCTGAGG |
| SPI1 | hTFtarget | 762 | 777 | - | 13.3714 | 1.34E-05 | 0.0251 | GCAACCTCCGCCTCCC |
| SPI1 | hTFtarget | 1913 | 1928 | + | 12.9857 | 1.34E-05 | 0.0383 | AGGAGGTGGGGCTGGT |
| KLF5 | hTFtarget | 128 | 139 | - | 13.3816 | 1.35E-05 | 0.0169 | GGTGGGTGGGGG |
| BRD4 | hTFtarget | 1713 | 1734 | - | 13.039 | 1.35E-05 | 0.0164 | GCTTCCCCCATGCCCTGGCCTT |
| SPI1 | hTFtarget | 763 | 778 | - | 13.3857 | 1.35E-05 | 0.0195 | TGCAACCTCCGCCTCC |
| SPI1 | hTFtarget | 762 | 773 | + | 13.5526 | 1.35E-05 | 0.0488 | GGGAGGCGGAGG |
| STAT3 | hTFtarget | 1991 | 1999 | - | 13.4737 | 1.35E-05 | 0.0253 | GGGGAGGGA |
| EGR1 | hTFtarget | 1904 | 1923 | - | 11.5455 | 1.35E-05 | 0.0342 | CCCCACCTCCTCCCACATAC |
| E2F4 | database | 1557 | 1567 | - | 14.1897 | 1.36E-05 | 0.0484 | AGGCGGGAGGA |
| SIN3A | hTFtarget | 415 | 430 | - | 13.3816 | 1.36E-05 | 0.0177 | CCTAGAGGAAGTGAGG |
| SMAD1 | hTFtarget | 756 | 777 | - | 10.6579 | 1.36E-05 | 0.0444 | GCAACCTCCGCCTCCCGGGTTC |
| YY1 | hTFtarget | 1911 | 1926 | - | 12.1974 | 1.36E-05 | 0.0245 | CAGCCCCACCTCCTCC |
| SETDB1 | hTFtarget | 545 | 566 | + | 10.8158 | 1.37E-05 | 0.0271 | GTCCCCTCTCCTCCAGAAGTTC |
| SPI1 | hTFtarget | 763 | 778 | - | 13.2714 | 1.37E-05 | 0.0426 | TGCAACCTCCGCCTCC |
| SPI1 | hTFtarget | 364 | 385 | + | 12.5143 | 1.37E-05 | 0.0225 | CCCGGTCCTTCCCCTTCCAGCT |
| ETS1 | hTFtarget | 434 | 449 | + | 13.2857 | 1.38E-05 | 0.0258 | CCTTCCCTGATTACTT |
| GATA6 | hTFtarget | 1474 | 1485 | - | 13.5065 | 1.38E-05 | 0.0275 | TAAATAAACACA |
| MAZ | hTFtarget | 122 | 137 | + | 13.1212 | 1.38E-05 | 0.02 | GCCTGTCCCCCACCCA |
| BHLHE40 | hTFtarget | 759 | 773 | - | 12.4868 | 1.38E-05 | 0.0247 | CCTCCGCCTCCCGGG |
| SPI1 | hTFtarget | 758 | 773 | - | 13.3286 | 1.38E-05 | 0.0257 | CCTCCGCCTCCCGGGT |
| CHD1 | hTFtarget | 1911 | 1926 | + | 12.9868 | 1.38E-05 | 0.0229 | GGAGGAGGTGGGGCTG |
| STAG1 | hTFtarget | 1428 | 1449 | + | 12.0303 | 1.39E-05 | 0.0496 | GCCAGCAGGCATCACCCATGGC |
| WT1 | database | 1912 | 1924 | + | 13.2697 | 1.40E-05 | 0.0491 | GAGGAGGTGGGGC |
| NANOG | hTFtarget | 99 | 107 | + | 13.0286 | 1.40E-05 | 0.0249 | CTCAGCGGG |
| NANOG | hTFtarget | 99 | 107 | + | 13.3026 | 1.40E-05 | 0.0257 | CTCAGCGGG |
| BHLHE40 | hTFtarget | 1988 | 1999 | + | 13.2632 | 1.40E-05 | 0.0416 | TTGTCCCTCCCC |
| SMAD3 | hTFtarget | 99 | 107 | + | 13.4857 | 1.40E-05 | 0.0262 | CTCAGCGGG |
| SOX2 | hTFtarget | 99 | 107 | + | 13.7895 | 1.40E-05 | 0.0252 | CTCAGCGGG |
| TAF1 | hTFtarget | 764 | 779 | + | 12.3553 | 1.40E-05 | 0.0182 | GAGGCGGAGGTTGCAG |
| CDK8 | hTFtarget | 1337 | 1345 | - | 14.0526 | 1.40E-05 | 0.0274 | CACATCCTG |
| E2F4 | hTFtarget | 1558 | 1566 | - | 14.4868 | 1.40E-05 | 0.049 | GGCGGGAGG |
| E2F4 | hTFtarget | 1558 | 1566 | - | 14.0132 | 1.40E-05 | 0.049 | GGCGGGAGG |
| WT1 | database | 1912 | 1924 | + | 13.2755 | 1.40E-05 | 0.0483 | GAGGAGGTGGGGC |
| SP3 | database | 759 | 778 | + | 13.0459 | 1.42E-05 | 0.0163 | CCCGGGAGGCGGAGGTTGCA |
| AR | hTFtarget | 2 | 26 | - | 12.7183 | 1.42E-05 | 0.0187 | TGTTTTGTATTACTTTGTTTGATCT |
| SP1 | hTFtarget | 762 | 773 | + | 13.4429 | 1.42E-05 | 0.0273 | GGGAGGCGGAGG |
| SPI1 | hTFtarget | 762 | 773 | + | 13.3857 | 1.42E-05 | 0.0267 | GGGAGGCGGAGG |
| FOXF2 | database | 1476 | 1486 | + | 13.2174 | 1.43E-05 | 0.0285 | TGTTTATTTAT |
| UBTF | hTFtarget | 1249 | 1264 | - | 12.5789 | 1.43E-05 | 0.0278 | CCTCAAGGCCAAGGCA |
| AR | hTFtarget | 120 | 131 | + | 13.3553 | 1.43E-05 | 0.0291 | CAGCCTGTCCCC |
| EP300 | hTFtarget | 1412 | 1423 | + | 13.0286 | 1.43E-05 | 0.0368 | CACCTTGACCTC |
| FOXF2 | database | 1476 | 1486 | - | 13.2178 | 1.43E-05 | 0.0285 | ATAAATAAACA |
| SP7 | database | 759 | 778 | + | 13 | 1.43E-05 | 0.0163 | CCCGGGAGGCGGAGGTTGCA |
| ESR1 | hTFtarget | 307 | 328 | - | 3.29577 | 1.44E-05 | 0.0498 | GGCACAGAGTAGGAACGAGCAA |
| AR | hTFtarget | 3 | 21 | - | 13.0423 | 1.44E-05 | 0.0469 | TGTATTACTTTGTTTGATC |
| REST | hTFtarget | 656 | 671 | + | 10.2424 | 1.44E-05 | 0.0321 | CTGGCCAACGTGGTGA |
| SPI1 | hTFtarget | 1949 | 1964 | - | 13.4079 | 1.44E-05 | 0.0342 | ATGGCCCACAGCCCAA |
| SPI1 | hTFtarget | 762 | 779 | - | 12.8684 | 1.44E-05 | 0.0266 | CTGCAACCTCCGCCTCCC |
| BDP1 | database | 1531 | 1542 | + | 13.1532 | 1.45E-05 | 0.0288 | GGTCTCAAACTC |
| NRF1 | hTFtarget | 1912 | 1923 | - | 13.1 | 1.45E-05 | 0.0208 | CCCCACCTCCTC |
| GTF3C2 | hTFtarget | 721 | 742 | + | 12.1842 | 1.46E-05 | 0.0279 | CAGCTACTCGTGAGGCTGAGGC |
| SP2 | hTFtarget | 762 | 775 | - | 13.5286 | 1.46E-05 | 0.0274 | AACCTCCGCCTCCC |
| FOXJ2 | database | 1480 | 1489 | + | 13.5543 | 1.47E-05 | 0.0293 | TATTTATTTA |
| SPI1 | database | 420 | 427 | - | 13.5 | 1.47E-05 | 0.0282 | AGAGGAAG |
| SPI1 | database | 1813 | 1820 | - | 13.5 | 1.47E-05 | 0.0282 | AGAGGAAG |
| MYB | hTFtarget | 417 | 428 | + | 13.5921 | 1.47E-05 | 0.0282 | TCACTTCCTCTA |
| SPI1 | hTFtarget | 1914 | 1929 | - | 13.2286 | 1.47E-05 | 0.0226 | AACCAGCCCCACCTCC |
| KLF4 | hTFtarget | 1710 | 1721 | + | 13 | 1.48E-05 | 0.0259 | CCTAAGGCCAGG |
| ZNF384 | hTFtarget | 795 | 810 | - | 13.1053 | 1.48E-05 | 0.025 | GGCTAGAGTGCAGTGG |
| SP1 | hTFtarget | 762 | 773 | - | 13.2763 | 1.49E-05 | 0.0273 | CCTCCGCCTCCC |
| SPI1 | hTFtarget | 763 | 778 | - | 13.2429 | 1.49E-05 | 0.0258 | TGCAACCTCCGCCTCC |
| CBFB | hTFtarget | 1810 | 1821 | - | 13.2143 | 1.49E-05 | 0.0224 | CAGAGGAAGAGA |
| TAF1 | hTFtarget | 732 | 747 | + | 12.0526 | 1.49E-05 | 0.0266 | GAGGCTGAGGCAGAAG |
| CREBBP | hTFtarget | 998 | 1012 | - | 12.6119 | 1.49E-05 | 0.0271 | GAAAGGGAGCCAGGG |
| CREBBP | hTFtarget | 1911 | 1922 | - | 13.4286 | 1.49E-05 | 0.0282 | CCCACCTCCTCC |
| HCFC1 | hTFtarget | 760 | 775 | + | 10.7714 | 1.50E-05 | 0.0307 | CCGGGAGGCGGAGGTT |
| SPI1 | hTFtarget | 1990 | 2000 | + | 13.3684 | 1.50E-05 | 0.0439 | GTCCCTCCCCT |
| SPI1 | hTFtarget | 1914 | 1925 | + | 13.2237 | 1.50E-05 | 0.0283 | GGAGGTGGGGCT |
| TFAP2C | hTFtarget | 1705 | 1720 | - | 13.3939 | 1.50E-05 | 0.0277 | CTGGCCTTAGGCAGAT |
| ZNF263 | database | 367 | 387 | - | 12.4286 | 1.51E-05 | 0.0173 | GGAGCTGGAAGGGGAAGGACC |
| SIN3A | hTFtarget | 1908 | 1923 | + | 13.2237 | 1.51E-05 | 0.0177 | GTGGGAGGAGGTGGGG |
| SPI1 | hTFtarget | 1913 | 1928 | - | 13.2286 | 1.51E-05 | 0.035 | ACCAGCCCCACCTCCT |
| TFAP2C | hTFtarget | 1709 | 1720 | - | 13.3636 | 1.51E-05 | 0.0279 | CTGGCCTTAGGC |
| SP1 | database | 763 | 773 | + | 13.0899 | 1.52E-05 | 0.0228 | GGAGGCGGAGG |
| IRF3 | hTFtarget | 762 | 773 | + | 13.4211 | 1.52E-05 | 0.0285 | GGGAGGCGGAGG |
| NFYA | hTFtarget | 763 | 774 | - | 13.6316 | 1.52E-05 | 0.0282 | ACCTCCGCCTCC |
| E2F4 | hTFtarget | 99 | 110 | + | 13.5921 | 1.52E-05 | 0.0367 | CTCAGCGGGAAG |
| GATA4 | hTFtarget | 1190 | 1199 | - | 13.013 | 1.53E-05 | 0.0464 | AAGGTAAACA |
| GTF2I | hTFtarget | 602 | 623 | - | 12.1711 | 1.53E-05 | 0.0193 | GCCCGCCTCAGCCTCCCAAAGC |
| REST | hTFtarget | 982 | 1006 | + | 12.2987 | 1.53E-05 | 0.0455 | CTAAGGGAAGCTGAGGCCCTGGCTC |
| SPI1 | hTFtarget | 757 | 778 | + | 11.1286 | 1.53E-05 | 0.031 | AACCCGGGAGGCGGAGGTTGCA |
| SPI1 | hTFtarget | 762 | 773 | + | 13.4286 | 1.53E-05 | 0.0289 | GGGAGGCGGAGG |
| GATA1 | hTFtarget | 836 | 855 | + | 12.5 | 1.54E-05 | 0.0297 | CAAAAAAAAGAAGTTGATAA |
| MAX | hTFtarget | 414 | 429 | - | 13.1558 | 1.54E-05 | 0.0296 | CTAGAGGAAGTGAGGT |
| SPI1 | hTFtarget | 1989 | 2000 | - | 13.1842 | 1.54E-05 | 0.0283 | AGGGGAGGGACA |
| SPI1 | hTFtarget | 762 | 773 | + | 13.3026 | 1.54E-05 | 0.0292 | GGGAGGCGGAGG |
| SPI1 | hTFtarget | 763 | 778 | - | 12.9143 | 1.54E-05 | 0.0386 | TGCAACCTCCGCCTCC |
| TRIM28 | hTFtarget | 1238 | 1253 | - | 12.3684 | 1.54E-05 | 0.0302 | AGGCAGTTGAACTGCA |
| KLF5 | hTFtarget | 124 | 139 | + | 13.1515 | 1.55E-05 | 0.0292 | CTGTCCCCCACCCACC |
| KLF5 | hTFtarget | 1913 | 1928 | - | 13.1515 | 1.55E-05 | 0.0292 | ACCAGCCCCACCTCCT |
| RAC3 | hTFtarget | 1366 | 1380 | - | 13.0571 | 1.55E-05 | 0.0302 | GTACCAGGGTGCCCT |
| RUNX1 | hTFtarget | 1809 | 1820 | + | 13.2895 | 1.55E-05 | 0.0299 | CTCTCTTCCTCT |
| SPI1 | hTFtarget | 1914 | 1924 | + | 13 | 1.55E-05 | 0.0337 | GGAGGTGGGGC |
| STAT1 | hTFtarget | 1552 | 1567 | - | 10.6053 | 1.55E-05 | 0.0296 | AGGCGGGAGGATCACT |
| TAF1 | hTFtarget | 1912 | 1927 | + | 12.1579 | 1.55E-05 | 0.0182 | GAGGAGGTGGGGCTGG |
| AR | hTFtarget | 1662 | 1673 | + | 13.2763 | 1.55E-05 | 0.0291 | CAGCCTGTACAG |
| REST | hTFtarget | 1571 | 1582 | + | 12.1818 | 1.56E-05 | 0.0414 | CCAAAGTGCTGG |
| UBTF | hTFtarget | 990 | 1005 | + | 12.4079 | 1.56E-05 | 0.0278 | AGCTGAGGCCCTGGCT |
| MYB | hTFtarget | 417 | 428 | + | 13.4079 | 1.57E-05 | 0.0302 | TCACTTCCTCTA |
| POLR3A | hTFtarget | 591 | 606 | + | 13.3026 | 1.57E-05 | 0.0201 | GTAATCCCAGTGCTTT |
| SPI1 | hTFtarget | 1909 | 1924 | - | 13.1316 | 1.57E-05 | 0.0375 | GCCCCACCTCCTCCCA |
| TCF12 | hTFtarget | 415 | 430 | - | 13.0395 | 1.57E-05 | 0.0479 | CCTAGAGGAAGTGAGG |
| EWSR1 | hTFtarget | 339 | 354 | - | -1.77143 | 1.59E-05 | 0.0325 | CAGGGAGGAGGAACAG |
| SPI1 | hTFtarget | 1908 | 1923 | + | 12.9143 | 1.59E-05 | 0.0198 | GTGGGAGGAGGTGGGG |
| POLR2A | hTFtarget | 763 | 777 | + | 12.1842 | 1.60E-05 | 0.0209 | GGAGGCGGAGGTTGC |
| SMARCA4 | hTFtarget | 1484 | 1499 | - | 13.0833 | 1.60E-05 | 0.0317 | ACAAAAAGTATAAATA |
| NFYA | hTFtarget | 762 | 773 | + | 13.1143 | 1.61E-05 | 0.0301 | GGGAGGCGGAGG |
| POLR2A | hTFtarget | 761 | 776 | - | 12.2763 | 1.61E-05 | 0.0303 | CAACCTCCGCCTCCCG |
| AR | hTFtarget | 1474 | 1494 | + | 12.2817 | 1.63E-05 | 0.0323 | TGTGTTTATTTATTTATACTT |
| MAZ | hTFtarget | 761 | 772 | - | 13.4091 | 1.63E-05 | 0.041 | CTCCGCCTCCCG |
| SRF | hTFtarget | 1719 | 1740 | - | 11.6184 | 1.63E-05 | 0.0496 | CCTCAGGCTTCCCCCATGCCCT |
| E2F4 | hTFtarget | 1913 | 1924 | + | 13.2632 | 1.63E-05 | 0.0301 | AGGAGGTGGGGC |
| FOS | hTFtarget | 762 | 773 | + | 13.2368 | 1.64E-05 | 0.0206 | GGGAGGCGGAGG |
| MAZ | hTFtarget | 1984 | 1999 | + | 12.7143 | 1.64E-05 | 0.0254 | TTCGTTGTCCCTCCCC |
| SPI1 | hTFtarget | 1913 | 1928 | - | 13.2143 | 1.64E-05 | 0.0308 | ACCAGCCCCACCTCCT |
| SPI1 | hTFtarget | 762 | 777 | - | 12.9857 | 1.64E-05 | 0.0304 | GCAACCTCCGCCTCCC |
| AP2 | database | 1360 | 1372 | - | 13 | 1.65E-05 | 0.0268 | GTGCCCTCCGGCC |
| HCFC1 | hTFtarget | 59 | 74 | + | 10.5571 | 1.65E-05 | 0.0307 | CGGGAAACGGTAGTCC |
| SP2 | hTFtarget | 8 | 23 | - | 13.0556 | 1.65E-05 | 0.0216 | TTTGTATTACTTTGTT |
| CLOCK | hTFtarget | 763 | 774 | - | 13.3947 | 1.65E-05 | 0.0311 | ACCTCCGCCTCC |
| ESR2 | hTFtarget | 538 | 551 | + | 12.8636 | 1.66E-05 | 0.0384 | GGTCTTGGTCCCCT |
| FOS | hTFtarget | 762 | 773 | + | 13.0526 | 1.66E-05 | 0.0309 | GGGAGGCGGAGG |
| EWSR1 | hTFtarget | 1032 | 1051 | + | 8.50806 | 1.66E-05 | 0.02 | GAGTGAAGAACAGAAGGCAG |
| NRF1 | hTFtarget | 129 | 140 | + | 12.8286 | 1.66E-05 | 0.0208 | CCCCACCCACCA |
| POLR2A | hTFtarget | 606 | 621 | - | 12.3158 | 1.66E-05 | 0.0311 | CCGCCTCAGCCTCCCA |
| SIX5 | hTFtarget | 1564 | 1584 | + | 12.8312 | 1.66E-05 | 0.0325 | GCCTTGGCCAAAGTGCTGGGA |
| TBP | hTFtarget | 763 | 774 | - | 13.0263 | 1.66E-05 | 0.0303 | ACCTCCGCCTCC |
| EWSR1 | hTFtarget | 1061 | 1085 | - | -9.42424 | 1.67E-05 | 0.0264 | AGAAACAAGGGAAGTTAGCAGAGAA |
| REST | hTFtarget | 1567 | 1582 | + | 9.86364 | 1.67E-05 | 0.0321 | TTGGCCAAAGTGCTGG |
| TEAD4 | hTFtarget | 655 | 670 | - | 7.10606 | 1.67E-05 | 0.0321 | CACCACGTTGGCCAGG |
| USF2 | hTFtarget | 1989 | 2000 | + | 12.6711 | 1.67E-05 | 0.0329 | TGTCCCTCCCCT |
| AP2 | database | 1732 | 1744 | - | 12.9899 | 1.68E-05 | 0.0268 | CATCCCTCAGGCT |
| FLI1 | hTFtarget | 1032 | 1056 | - | -20.6143 | 1.68E-05 | 0.0195 | GCCCCCTGCCTTCTGTTCTTCACTC |
| IRF5 | hTFtarget | 630 | 651 | - | 12.1299 | 1.68E-05 | 0.0216 | GTCTCGAACTCCTGACCTCAAG |
| TFAP2C | hTFtarget | 1358 | 1373 | - | 13.1364 | 1.69E-05 | 0.0316 | GGTGCCCTCCGGCCAC |
| MAX | hTFtarget | 763 | 774 | - | 12.5658 | 1.70E-05 | 0.043 | ACCTCCGCCTCC |
| MXI1 | hTFtarget | 1967 | 1982 | + | 12.8684 | 1.70E-05 | 0.0445 | CTGGCTCTGGCCCTGG |
| MYC | hTFtarget | 1991 | 1999 | + | 13.1711 | 1.70E-05 | 0.0385 | TCCCTCCCC |
| POLR2A | hTFtarget | 732 | 747 | + | 12.5658 | 1.70E-05 | 0.0332 | GAGGCTGAGGCAGAAG |
| STAT5A | hTFtarget | 1552 | 1567 | - | 9.10526 | 1.70E-05 | 0.0326 | AGGCGGGAGGATCACT |
| FOXP1 | hTFtarget | 1188 | 1198 | + | 13.2687 | 1.71E-05 | 0.038 | TCTGTTTACCT |
| REST | hTFtarget | 656 | 671 | + | 2.64286 | 1.71E-05 | 0.0326 | CTGGCCAACGTGGTGA |
| REST | hTFtarget | 1570 | 1581 | - | 11.8333 | 1.71E-05 | 0.0366 | CAGCACTTTGGC |
| SPI1 | hTFtarget | 762 | 773 | + | 13.0921 | 1.71E-05 | 0.0372 | GGGAGGCGGAGG |
| RFX2 | hTFtarget | 762 | 773 | + | 12.5395 | 1.72E-05 | 0.0324 | GGGAGGCGGAGG |
| SPI1 | hTFtarget | 761 | 775 | - | 12.7632 | 1.72E-05 | 0.0312 | AACCTCCGCCTCCCG |
| SPI1 | hTFtarget | 763 | 778 | + | 12.8571 | 1.72E-05 | 0.0257 | GGAGGCGGAGGTTGCA |
| TFAP2C | hTFtarget | 1707 | 1721 | - | 13.303 | 1.72E-05 | 0.0314 | CCTGGCCTTAGGCAG |
| USF2 | hTFtarget | 341 | 352 | + | 12.5921 | 1.72E-05 | 0.0298 | GTTCCTCCTCCC |
| PBX3 | hTFtarget | 763 | 774 | + | 12.6711 | 1.73E-05 | 0.0415 | GGAGGCGGAGGT |
| NFYB | hTFtarget | 1786 | 1797 | + | 8.61842 | 1.74E-05 | 0.0225 | ACATGGGTGGGT |
| SPI1 | hTFtarget | 1908 | 1923 | + | 12.8286 | 1.74E-05 | 0.0257 | GTGGGAGGAGGTGGGG |
| OTX2 | database | 712 | 726 | - | 13.011 | 1.75E-05 | 0.0223 | TAGCTGGGATTACAG |
| BRCA1 | hTFtarget | 762 | 773 | - | 12.8158 | 1.75E-05 | 0.0246 | CCTCCGCCTCCC |
| SPI1 | hTFtarget | 763 | 778 | - | 12.8429 | 1.75E-05 | 0.0338 | TGCAACCTCCGCCTCC |
| SPI1 | hTFtarget | 1418 | 1442 | - | 12.2895 | 1.75E-05 | 0.0465 | GTGATGCCTGCTGGCACCTGAGGTC |
| CBFB | hTFtarget | 1335 | 1346 | + | 13.0571 | 1.75E-05 | 0.0224 | CTCAGGATGTGG |
| TAL1 | hTFtarget | 656 | 671 | + | 4.13158 | 1.75E-05 | 0.0332 | CTGGCCAACGTGGTGA |
| NFYA | hTFtarget | 763 | 774 | + | 13.3286 | 1.76E-05 | 0.0332 | GGAGGCGGAGGT |
| SPI1 | hTFtarget | 762 | 773 | + | 13.0132 | 1.76E-05 | 0.0332 | GGGAGGCGGAGG |
| SPI1 | hTFtarget | 275 | 286 | - | 13.0526 | 1.76E-05 | 0.0304 | AGGAGGCAGGAC |
| OTX2 | database | 712 | 726 | + | 13.01 | 1.76E-05 | 0.0223 | CTGTAATCCCAGCTA |
| T | hTFtarget | 98 | 112 | + | 13.0758 | 1.77E-05 | 0.0327 | TCTCAGCGGGAAGAA |
| USF2 | hTFtarget | 763 | 774 | - | 12.5658 | 1.77E-05 | 0.0329 | ACCTCCGCCTCC |
| REST | hTFtarget | 1570 | 1581 | - | 11.7273 | 1.78E-05 | 0.0401 | CAGCACTTTGGC |
| STAT3 | hTFtarget | 380 | 391 | - | 13.1286 | 1.79E-05 | 0.0334 | GGTAGGAGCTGG |
| YY1 | hTFtarget | 761 | 782 | - | 10.0658 | 1.80E-05 | 0.0299 | TCACTGCAACCTCCGCCTCCCG |
| RB1 | hTFtarget | 1558 | 1569 | + | 13.2632 | 1.81E-05 | 0.0455 | CCTCCCGCCTTG |
| SPI1 | hTFtarget | 1985 | 2000 | + | 12.7857 | 1.81E-05 | 0.0338 | TCGTTGTCCCTCCCCT |
| TCF3 | hTFtarget | 1810 | 1821 | + | 12.8714 | 1.81E-05 | 0.0356 | TCTCTTCCTCTG |
| EP300 | hTFtarget | 377 | 392 | + | 12.7 | 1.81E-05 | 0.0146 | CTTCCAGCTCCTACCT |
| TBX5 | database | 1408 | 1417 | + | 10.3853 | 1.82E-05 | 0.0358 | CTCCCACCTT |
| SPI1 | hTFtarget | 1990 | 2000 | - | 12.7237 | 1.82E-05 | 0.0337 | AGGGGAGGGAC |
| CREB1 | hTFtarget | 327 | 351 | + | 12.3446 | 1.82E-05 | 0.041 | CCTTCACTCACACTGTTCCTCCTCC |
| EWSR1 | hTFtarget | 1045 | 1060 | + | -2.44286 | 1.83E-05 | 0.0325 | AAGGCAGGGGGCCAGT |
| HNF1B | hTFtarget | 1195 | 1212 | + | 12.6806 | 1.83E-05 | 0.0242 | ACCTTAATGATTGCCAAG |
| SPI1 | hTFtarget | 1985 | 2000 | + | 12.8714 | 1.83E-05 | 0.0226 | TCGTTGTCCCTCCCCT |
| SPI1 | hTFtarget | 763 | 778 | + | 12.5857 | 1.83E-05 | 0.0343 | GGAGGCGGAGGTTGCA |
| SPI1 | hTFtarget | 756 | 777 | - | 11.9571 | 1.83E-05 | 0.0225 | GCAACCTCCGCCTCCCGGGTTC |
| IRF3 | hTFtarget | 1840 | 1861 | + | 12.75 | 1.84E-05 | 0.0349 | AGGCTATGTGATCTGTCTCTCC |
| SPI1 | hTFtarget | 1316 | 1331 | + | 13.0395 | 1.84E-05 | 0.0342 | TTGGGTCCATCCCCAG |
| SMAD3 | hTFtarget | 1109 | 1120 | - | 12.6143 | 1.85E-05 | 0.0345 | GACCCTGCTGTG |
| STAT1 | hTFtarget | 1454 | 1465 | - | 12.5526 | 1.85E-05 | 0.0352 | CAATGGGGAGGA |
| EP300 | hTFtarget | 598 | 619 | - | 0.710526 | 1.85E-05 | 0.0351 | GCCTCAGCCTCCCAAAGCACTG |
| RELA | hTFtarget | 59 | 74 | + | 10.0857 | 1.86E-05 | 0.0359 | CGGGAAACGGTAGTCC |
| ZBTB33 | hTFtarget | 1985 | 2000 | + | 11.9474 | 1.86E-05 | 0.0226 | TCGTTGTCCCTCCCCT |
| AR | hTFtarget | 120 | 130 | - | 12.8857 | 1.86E-05 | 0.0353 | GGGACAGGCTG |
| AR | hTFtarget | 1474 | 1494 | + | 12.4935 | 1.87E-05 | 0.0299 | TGTGTTTATTTATTTATACTT |
| MED1 | hTFtarget | 414 | 429 | - | 12.9014 | 1.87E-05 | 0.0432 | CTAGAGGAAGTGAGGT |
| SPI1 | hTFtarget | 762 | 777 | - | 12.8857 | 1.87E-05 | 0.035 | GCAACCTCCGCCTCCC |
| ZNF143 | hTFtarget | 761 | 775 | + | 11.7632 | 1.87E-05 | 0.0477 | CGGGAGGCGGAGGTT |
| EP300 | hTFtarget | 119 | 130 | + | 12.9079 | 1.87E-05 | 0.0365 | TCAGCCTGTCCC |
| EP300 | hTFtarget | 1807 | 1822 | + | 12.6571 | 1.87E-05 | 0.0146 | GCCTCTCTTCCTCTGG |
| AR | hTFtarget | 1474 | 1489 | + | 12.7273 | 1.88E-05 | 0.0372 | TGTGTTTATTTATTTA |
| NANOG | hTFtarget | 99 | 107 | + | 12.75 | 1.89E-05 | 0.0353 | CTCAGCGGG |
| SP2 | hTFtarget | 762 | 773 | + | 12.9211 | 1.89E-05 | 0.0248 | GGGAGGCGGAGG |
| SPI1 | hTFtarget | 1985 | 2000 | + | 12.8286 | 1.90E-05 | 0.0195 | TCGTTGTCCCTCCCCT |
| TFAP2C | hTFtarget | 1357 | 1371 | + | 13 | 1.90E-05 | 0.0356 | AGTGGCCGGAGGGCA |
| FOXP1 | hTFtarget | 1474 | 1484 | + | 13.2388 | 1.91E-05 | 0.038 | TGTGTTTATTT |
| EP300 | hTFtarget | 1365 | 1376 | - | 12.7571 | 1.91E-05 | 0.0368 | CAGGGTGCCCTC |
| REST | hTFtarget | 1371 | 1382 | - | 11.5303 | 1.92E-05 | 0.0366 | CAGTACCAGGGT |
| TFAP2C | hTFtarget | 1359 | 1370 | - | 13.1061 | 1.92E-05 | 0.0233 | GCCCTCCGGCCA |
| EGR1 | hTFtarget | 1910 | 1929 | - | 10.6667 | 1.92E-05 | 0.0342 | AACCAGCCCCACCTCCTCCC |
| RXRA | hTFtarget | 1429 | 1440 | + | 12.7105 | 1.93E-05 | 0.036 | CCAGCAGGCATC |
| SPI1 | hTFtarget | 761 | 775 | + | 12.8684 | 1.93E-05 | 0.0366 | CGGGAGGCGGAGGTT |
| CEBPA | hTFtarget | 369 | 377 | + | 13.3684 | 1.94E-05 | 0.0473 | TCCTTCCCC |
| NANOG | hTFtarget | 99 | 107 | + | 12.7368 | 1.95E-05 | 0.0366 | CTCAGCGGG |
| NANOG | hTFtarget | 99 | 107 | + | 13.0526 | 1.95E-05 | 0.0358 | CTCAGCGGG |
| RXRA | hTFtarget | 904 | 915 | + | 12.6974 | 1.95E-05 | 0.036 | CCAGCACGTAGC |
| HDAC2 | hTFtarget | 151 | 172 | + | 12.3333 | 1.96E-05 | 0.039 | CTCAGTTTTGCCTTTTACCAAG |
| POLR2A | hTFtarget | 607 | 622 | + | 12.1711 | 1.96E-05 | 0.0416 | GGGAGGCTGAGGCGGG |
| SP1 | hTFtarget | 766 | 781 | + | 12.3714 | 1.96E-05 | 0.0189 | GGCGGAGGTTGCAGTG |
| ESR2 | hTFtarget | 1595 | 1608 | - | 12.6212 | 1.97E-05 | 0.0384 | GGGCATGGTGGCTC |
| BRCA1 | hTFtarget | 128 | 139 | + | 12.5526 | 1.97E-05 | 0.0246 | CCCCCACCCACC |
| SPI1 | hTFtarget | 1913 | 1924 | + | 12.8158 | 1.97E-05 | 0.0372 | AGGAGGTGGGGC |
| RUNX1 | hTFtarget | 1449 | 1460 | - | 13.0921 | 1.98E-05 | 0.0187 | GGGAGGAAAAAG |
| EP300 | hTFtarget | 414 | 429 | + | 12.5857 | 1.98E-05 | 0.0146 | ACCTCACTTCCTCTAG |
| ZBTB7B | database | 363 | 384 | - | 9.65306 | 1.99E-05 | 0.0441 | GCTGGAAGGGGAAGGACCGGGT |
| IRF5 | hTFtarget | 1729 | 1747 | - | 8.52632 | 1.99E-05 | 0.0239 | CAGCATCCCTCAGGCTTCC |
| SP2 | hTFtarget | 275 | 286 | - | 12.8289 | 1.99E-05 | 0.0248 | AGGAGGCAGGAC |
| CREBBP | hTFtarget | 537 | 552 | + | 12.5286 | 1.99E-05 | 0.0373 | GGGTCTTGGTCCCCTC |
| HDAC2 | hTFtarget | 541 | 562 | + | 12.2976 | 2.00E-05 | 0.039 | CTTGGTCCCCTCTCCTCCAGAA |
| IRF1 | hTFtarget | 337 | 352 | + | 12.7857 | 2.00E-05 | 0.0378 | CACTGTTCCTCCTCCC |
| NANOG | hTFtarget | 99 | 107 | + | 12.8947 | 2.00E-05 | 0.0374 | CTCAGCGGG |
| SOX2 | hTFtarget | 99 | 107 | - | 13.1579 | 2.00E-05 | 0.0358 | CCCGCTGAG |
| SP2 | hTFtarget | 124 | 139 | + | 12.4605 | 2.00E-05 | 0.0373 | CTGTCCCCCACCCACC |
| E2F7 | hTFtarget | 1188 | 1199 | - | 12.6883 | 2.00E-05 | 0.0398 | AAGGTAAACAGA |
| IRF4 | hTFtarget | 414 | 429 | + | 12.4 | 2.01E-05 | 0.0372 | ACCTCACTTCCTCTAG |
| SPI1 | hTFtarget | 763 | 774 | - | 12.8421 | 2.01E-05 | 0.0376 | ACCTCCGCCTCC |
| SPI1 | hTFtarget | 1912 | 1933 | - | 11.9 | 2.01E-05 | 0.0264 | CATTAACCAGCCCCACCTCCTC |
| FOXA2 | hTFtarget | 1913 | 1924 | + | 12.1974 | 2.02E-05 | 0.0407 | AGGAGGTGGGGC |
| SPI1 | hTFtarget | 1908 | 1929 | + | 10.4714 | 2.02E-05 | 0.031 | GTGGGAGGAGGTGGGGCTGGTT |
| AR | hTFtarget | 1466 | 1487 | - | 12.2078 | 2.03E-05 | 0.0496 | AATAAATAAACACATTAGATGA |
| ZNF384 | hTFtarget | 758 | 782 | - | 12.3253 | 2.03E-05 | 0.0482 | TCACTGCAACCTCCGCCTCCCGGGT |
| MYC | hTFtarget | 732 | 747 | - | 12.25 | 2.04E-05 | 0.0256 | CTTCTGCCTCAGCCTC |
| NFIC | hTFtarget | 998 | 1017 | - | 12.7857 | 2.04E-05 | 0.0309 | TGCTAGAAAGGGAGCCAGGG |
| SP1 | hTFtarget | 365 | 380 | - | 12.3 | 2.04E-05 | 0.0189 | GAAGGGGAAGGACCGG |
| SPI1 | hTFtarget | 758 | 773 | - | 12.6974 | 2.04E-05 | 0.0375 | CCTCCGCCTCCCGGGT |
| E2F4 | hTFtarget | 1558 | 1569 | - | 12.9868 | 2.04E-05 | 0.0367 | CAAGGCGGGAGG |
| ELK3 | hTFtarget | 1985 | 2000 | - | 12.25 | 2.04E-05 | 0.0383 | AGGGGAGGGACAACGA |
| HNF4A | hTFtarget | 1565 | 1583 | - | 12.5758 | 2.05E-05 | 0.0424 | CCCAGCACTTTGGCCAAGG |
| SPI1 | hTFtarget | 1914 | 1929 | - | 12.7286 | 2.05E-05 | 0.0258 | AACCAGCCCCACCTCC |
| SPI1 | hTFtarget | 762 | 777 | + | 12.1714 | 2.05E-05 | 0.0383 | GGGAGGCGGAGGTTGC |
| MAZ | hTFtarget | 122 | 137 | + | 12.2286 | 2.06E-05 | 0.0254 | GCCTGTCCCCCACCCA |
| REST | hTFtarget | 1371 | 1382 | - | 11.3788 | 2.06E-05 | 0.0401 | CAGTACCAGGGT |
| YY1 | hTFtarget | 1912 | 1927 | - | 10.3158 | 2.06E-05 | 0.0352 | CCAGCCCCACCTCCTC |
| SPI1 | hTFtarget | 1914 | 1929 | - | 12.6857 | 2.07E-05 | 0.0195 | AACCAGCCCCACCTCC |
| SPI1 | hTFtarget | 1909 | 1930 | + | 12.2143 | 2.07E-05 | 0.0383 | TGGGAGGAGGTGGGGCTGGTTA |
| GTF2I | hTFtarget | 1284 | 1305 | - | 11.5921 | 2.08E-05 | 0.0197 | TCCTATCCCAGAACCCTAAAAC |
| GTF3C2 | hTFtarget | 585 | 606 | + | 12.4103 | 2.08E-05 | 0.0206 | ACACCTGTAATCCCAGTGCTTT |
| SPI1 | hTFtarget | 1914 | 1929 | + | 12.5143 | 2.08E-05 | 0.0257 | GGAGGTGGGGCTGGTT |
| ZNF92 | hTFtarget | 418 | 433 | + | 12.2222 | 2.08E-05 | 0.0406 | CACTTCCTCTAGGAAG |
| FOS | hTFtarget | 128 | 139 | - | 12.6711 | 2.09E-05 | 0.0261 | GGTGGGTGGGGG |
| GATA3 | hTFtarget | 417 | 428 | - | 12.8143 | 2.09E-05 | 0.0434 | TAGAGGAAGTGA |
| PBX3 | hTFtarget | 762 | 773 | + | 12.3857 | 2.09E-05 | 0.0395 | GGGAGGCGGAGG |
| SPI1 | hTFtarget | 1914 | 1925 | - | 12.75 | 2.09E-05 | 0.0398 | AGCCCCACCTCC |
| SOX8 | database | 520 | 536 | - | -0.64286 | 2.09E-05 | 0.0414 | AATAAATTGTTGTGAAA |
| EOMES | hTFtarget | 256 | 276 | - | 12.5909 | 2.10E-05 | 0.0412 | ACTGTGTTGAGGGGCTGTGGA |
| REST | hTFtarget | 1372 | 1383 | + | 11.4242 | 2.11E-05 | 0.0414 | CCCTGGTACTGC |
| SPI1 | hTFtarget | 396 | 407 | + | 12.7763 | 2.11E-05 | 0.0372 | TTTTACTTCTCC |
| TCF12 | hTFtarget | 1428 | 1436 | + | 13.0789 | 2.11E-05 | 0.0245 | GCCAGCAGG |
| PBX3 | hTFtarget | 1328 | 1338 | - | 12.9091 | 2.12E-05 | 0.0452 | TGAGTGGCTGG |
| POU2F1 | hTFtarget | 1557 | 1572 | - | 12.0132 | 2.12E-05 | 0.0372 | GGCCAAGGCGGGAGGA |
| SUZ12 | hTFtarget | 1907 | 1922 | - | 12.4737 | 2.13E-05 | 0.028 | CCCACCTCCTCCCACA |
| THRA | database | 1416 | 1425 | - | 12.5542 | 2.14E-05 | 0.0411 | CTGAGGTCAA |
| ESR1 | hTFtarget | 328 | 352 | - | 11.7761 | 2.14E-05 | 0.0339 | GGGAGGAGGAACAGTGTGAGTGAAG |
| FLI1 | hTFtarget | 1044 | 1059 | - | -16.6818 | 2.14E-05 | 0.0482 | CTGGCCCCCTGCCTTC |
| SP2 | hTFtarget | 571 | 586 | - | 12.6184 | 2.14E-05 | 0.0277 | GTGAGCTATCATGCCC |
| SPI1 | hTFtarget | 1906 | 1927 | - | 11.7714 | 2.14E-05 | 0.0264 | CCAGCCCCACCTCCTCCCACAT |
| SPI1 | hTFtarget | 762 | 777 | - | 12.5132 | 2.14E-05 | 0.0401 | GCAACCTCCGCCTCCC |
| E2F7 | hTFtarget | 1908 | 1923 | - | 11.3143 | 2.14E-05 | 0.0395 | CCCCACCTCCTCCCAC |
| EHF | hTFtarget | 1038 | 1059 | + | 12.6301 | 2.14E-05 | 0.0426 | AGAACAGAAGGCAGGGGGCCAG |
| TFAP2C | hTFtarget | 1732 | 1743 | - | 12.9091 | 2.15E-05 | 0.0316 | ATCCCTCAGGCT |
| ZNF263 | hTFtarget | 344 | 352 | + | 13.8857 | 2.15E-05 | 0.0414 | CCTCCTCCC |
| ZNF263 | hTFtarget | 1910 | 1918 | - | 13.8857 | 2.15E-05 | 0.0414 | CCTCCTCCC |
| ESR1 | hTFtarget | 1851 | 1861 | - | 12.0746 | 2.16E-05 | 0.0321 | GGAGAGACAGA |
| BCL11A | hTFtarget | 96 | 107 | - | 12.8857 | 2.16E-05 | 0.0414 | CCCGCTGAGAGT |
| SPI1 | hTFtarget | 760 | 775 | - | 12.0921 | 2.16E-05 | 0.0406 | AACCTCCGCCTCCCGG |
| MAZ | hTFtarget | 764 | 779 | - | 12.2424 | 2.17E-05 | 0.02 | CTGCAACCTCCGCCTC |
| MAZ | hTFtarget | 1984 | 1999 | + | 12.2424 | 2.17E-05 | 0.02 | TTCGTTGTCCCTCCCC |
| MYC | hTFtarget | 1912 | 1927 | - | 12.1316 | 2.17E-05 | 0.0256 | CCAGCCCCACCTCCTC |
| SP1 | hTFtarget | 128 | 139 | + | 12.5789 | 2.17E-05 | 0.0273 | CCCCCACCCACC |
| SPI1 | hTFtarget | 762 | 773 | - | 12.7286 | 2.17E-05 | 0.041 | CCTCCGCCTCCC |
| ZBTB7B | database | 363 | 384 | - | 9.14286 | 2.17E-05 | 0.0472 | GCTGGAAGGGGAAGGACCGGGT |
| KLF5 | hTFtarget | 764 | 772 | - | 13.4474 | 2.18E-05 | 0.0395 | CTCCGCCTC |
| LMNB1 | hTFtarget | 1740 | 1755 | - | 9.08537 | 2.18E-05 | 0.0127 | GTGCTCCTCAGCATCC |
| CDK8 | hTFtarget | 367 | 391 | + | 12 | 2.19E-05 | 0.0352 | GGTCCTTCCCCTTCCAGCTCCTACC |
| EWSR1 | hTFtarget | 277 | 296 | - | 7.83871 | 2.20E-05 | 0.02 | GGAGCCAGTAAGGAGGCAGG |
| SPI1 | hTFtarget | 1989 | 2000 | - | 12.7237 | 2.20E-05 | 0.0389 | AGGGGAGGGACA |
| C17orf96 | hTFtarget | 458 | 482 | - | 12.4557 | 2.20E-05 | 0.0401 | GAGTCCAGAGAAGGGAATGATGAGA |
| EWSR1 | hTFtarget | 1034 | 1058 | + | -10.5455 | 2.21E-05 | 0.0264 | GTGAAGAACAGAAGGCAGGGGGCCA |
| HNF4A | hTFtarget | 796 | 814 | + | 12.4545 | 2.21E-05 | 0.0424 | CACTGCACTCTAGCCTGGG |
| SPI1 | hTFtarget | 123 | 138 | - | 12.7286 | 2.21E-05 | 0.021 | GTGGGTGGGGGACAGG |
| SP1 | database | 128 | 138 | - | 12.5506 | 2.23E-05 | 0.0228 | GTGGGTGGGGG |
| SIN3A | hTFtarget | 763 | 778 | + | 12.6053 | 2.24E-05 | 0.0197 | GGAGGCGGAGGTTGCA |
| SPI1 | hTFtarget | 1908 | 1923 | - | 12.2143 | 2.24E-05 | 0.0386 | CCCCACCTCCTCCCAC |
| OTX2 | database | 589 | 603 | - | 12.7473 | 2.25E-05 | 0.0223 | GCACTGGGATTACAG |
| PBX3 | hTFtarget | 1914 | 1925 | + | 12.0789 | 2.25E-05 | 0.0415 | GGAGGTGGGGCT |
| POLR3A | hTFtarget | 793 | 808 | - | 12.4286 | 2.25E-05 | 0.0425 | CTAGAGTGCAGTGGCG |
| SP1 | hTFtarget | 762 | 773 | + | 12.3816 | 2.25E-05 | 0.0426 | GGGAGGCGGAGG |
| OTX2 | database | 589 | 603 | + | 12.75 | 2.25E-05 | 0.0223 | CTGTAATCCCAGTGC |
| AR | database | 117 | 131 | - | 13.0385 | 2.27E-05 | 0.0435 | GGGGACAGGCTGAAC |
| AR | hTFtarget | 1466 | 1486 | + | 12.1558 | 2.27E-05 | 0.0299 | TCATCTAATGTGTTTATTTAT |
| GATA1 | hTFtarget | 380 | 399 | - | 11.8205 | 2.27E-05 | 0.0297 | AAAAGACAGGTAGGAGCTGG |
| NFYA | hTFtarget | 762 | 773 | + | 12.5526 | 2.27E-05 | 0.0423 | GGGAGGCGGAGG |
| AR | hTFtarget | 1474 | 1485 | + | 12.7361 | 2.27E-05 | 0.0452 | TGTGTTTATTTA |
| HNF1A | database | 1170 | 1183 | + | 12.5657 | 2.28E-05 | 0.0454 | AGTTAATGGTTGAC |
| HNF1A | database | 1170 | 1183 | + | 12.5657 | 2.28E-05 | 0.0454 | AGTTAATGGTTGAC |
| PBX3 | hTFtarget | 241 | 251 | + | 12.8333 | 2.28E-05 | 0.0452 | TGACTGACAGT |
| TFAP2C | hTFtarget | 1357 | 1372 | + | 12.7424 | 2.28E-05 | 0.0284 | AGTGGCCGGAGGGCAC |
| FLI1 | hTFtarget | 1039 | 1060 | - | -6 | 2.29E-05 | 0.031 | ACTGGCCCCCTGCCTTCTGTTC |
| PCGF2 | hTFtarget | 1731 | 1752 | - | 12.5 | 2.29E-05 | 0.0216 | CTCCTCAGCATCCCTCAGGCTT |
| SPI1 | hTFtarget | 1985 | 2000 | - | 12.2571 | 2.29E-05 | 0.035 | AGGGGAGGGACAACGA |
| IRF5 | hTFtarget | 787 | 808 | + | 11.5584 | 2.30E-05 | 0.0221 | AGATTGCGCCACTGCACTCTAG |
| RCOR1 | hTFtarget | 823 | 838 | - | 11.9155 | 2.30E-05 | 0.0403 | TTGAGACTCAGTCTCA |
| TCF3 | hTFtarget | 1808 | 1821 | - | 12.5921 | 2.30E-05 | 0.0445 | CAGAGGAAGAGAGG |
| FOXA2 | hTFtarget | 128 | 139 | - | 11.9211 | 2.31E-05 | 0.0407 | GGTGGGTGGGGG |
| MAX | hTFtarget | 1914 | 1925 | - | 11.9605 | 2.31E-05 | 0.043 | AGCCCCACCTCC |
| SPIB | hTFtarget | 396 | 407 | - | 12.5658 | 2.31E-05 | 0.0436 | GGAGAAGTAAAA |
| RELA | hTFtarget | 1808 | 1819 | + | 13.0395 | 2.32E-05 | 0.0391 | CCTCTCTTCCTC |
| REST | hTFtarget | 654 | 672 | - | 4.15152 | 2.32E-05 | 0.0442 | TTCACCACGTTGGCCAGGC |
| ZBTB17 | hTFtarget | 178 | 193 | + | 10.5526 | 2.32E-05 | 0.0445 | CAGGCACAACTAAAGG |
| KLF1 | database | 1337 | 1346 | - | 13.0714 | 2.33E-05 | 0.0428 | CCACATCCTG |
| GATA4 | hTFtarget | 1476 | 1485 | - | 12.8312 | 2.33E-05 | 0.0464 | TAAATAAACA |
| SP2 | hTFtarget | 1839 | 1860 | - | 12.25 | 2.33E-05 | 0.0297 | GAGAGACAGATCACATAGCCTG |
| TRIM24 | hTFtarget | 368 | 389 | - | 10.6184 | 2.33E-05 | 0.0191 | TAGGAGCTGGAAGGGGAAGGAC |
| FLI1 | hTFtarget | 1907 | 1922 | - | 12.3553 | 2.34E-05 | 0.043 | CCCACCTCCTCCCACA |
| STAT2 | hTFtarget | 1907 | 1918 | + | 12.8571 | 2.34E-05 | 0.0221 | TGTGGGAGGAGG |
| E2F7 | hTFtarget | 609 | 624 | - | 10.6579 | 2.34E-05 | 0.0323 | TGCCCGCCTCAGCCTC |
| EHF | hTFtarget | 454 | 475 | - | 12.5068 | 2.34E-05 | 0.0426 | GAGAAGGGAATGATGAGAATAA |
| AR | hTFtarget | 120 | 131 | - | 12.8026 | 2.35E-05 | 0.0459 | GGGGACAGGCTG |
| SP1 | database | 128 | 138 | + | 12.9615 | 2.36E-05 | 0.0219 | CCCCCACCCAC |
| SP2 | hTFtarget | 1792 | 1813 | - | 12.2237 | 2.36E-05 | 0.0297 | GAGAGGCATCATTGTCACCCAC |
| SPI1 | hTFtarget | 763 | 773 | - | 12.5526 | 2.36E-05 | 0.0439 | CCTCCGCCTCC |
| SPI1 | hTFtarget | 763 | 774 | - | 12.6429 | 2.36E-05 | 0.0362 | ACCTCCGCCTCC |
| SP1 | database | 1914 | 1923 | - | 12.5169 | 2.37E-05 | 0.041 | CCCCACCTCC |
| FLI1 | hTFtarget | 99 | 107 | + | 12.9868 | 2.37E-05 | 0.0448 | CTCAGCGGG |
| AR | hTFtarget | 1474 | 1492 | + | 12.2113 | 2.37E-05 | 0.0469 | TGTGTTTATTTATTTATAC |
| LMNB1 | hTFtarget | 252 | 267 | + | 8.87805 | 2.37E-05 | 0.0127 | TTCCTCCACAGCCCCT |
| POLR2A | hTFtarget | 762 | 777 | + | 11.8158 | 2.37E-05 | 0.0416 | GGGAGGCGGAGGTTGC |
| POLR2A | hTFtarget | 732 | 743 | + | 12.2368 | 2.38E-05 | 0.0391 | GAGGCTGAGGCA |
| SPI1 | hTFtarget | 1914 | 1929 | - | 11.7286 | 2.38E-05 | 0.0356 | AACCAGCCCCACCTCC |
| IRF4 | hTFtarget | 395 | 410 | + | 12.0857 | 2.39E-05 | 0.0372 | CTTTTACTTCTCCACT |
| SPI1 | hTFtarget | 128 | 139 | - | 12.8857 | 2.39E-05 | 0.03 | GGTGGGTGGGGG |
| IRF4 | hTFtarget | 394 | 409 | - | 11.8553 | 2.40E-05 | 0.0466 | GTGGAGAAGTAAAAGA |
| MXI1 | hTFtarget | 805 | 820 | + | 12.25 | 2.40E-05 | 0.0445 | CTAGCCTGGGTGACAG |
| POLR2A | hTFtarget | 732 | 747 | - | 11.0921 | 2.41E-05 | 0.0452 | CTTCTGCCTCAGCCTC |
| RUNX1 | hTFtarget | 607 | 618 | + | 12.6711 | 2.41E-05 | 0.0288 | GGGAGGCTGAGG |
| SPI1 | hTFtarget | 762 | 773 | + | 12.4868 | 2.41E-05 | 0.0304 | GGGAGGCGGAGG |
| SP1 | database | 763 | 772 | - | 12.5056 | 2.42E-05 | 0.041 | CTCCGCCTCC |
| SPI1 | hTFtarget | 1913 | 1928 | + | 12.1447 | 2.42E-05 | 0.0452 | AGGAGGTGGGGCTGGT |
| NANOG | hTFtarget | 99 | 107 | + | 12.6184 | 2.43E-05 | 0.0325 | CTCAGCGGG |
| RB1 | hTFtarget | 1387 | 1398 | - | 12.7763 | 2.43E-05 | 0.0455 | CTTCCCACCCAT |
| USF2 | hTFtarget | 1910 | 1921 | - | 11.8947 | 2.43E-05 | 0.0298 | CCACCTCCTCCC |
| SPI1 | hTFtarget | 761 | 776 | + | 12.1974 | 2.44E-05 | 0.0465 | CGGGAGGCGGAGGTTG |
| NFIC | hTFtarget | 770 | 789 | + | 12.4714 | 2.45E-05 | 0.0309 | GAGGTTGCAGTGAGCCAAGA |
| REST | hTFtarget | 656 | 671 | + | 1.87879 | 2.45E-05 | 0.0498 | CTGGCCAACGTGGTGA |
| CREBBP | hTFtarget | 1760 | 1774 | - | 12.0448 | 2.45E-05 | 0.0298 | GGGAGACTGAGCTGG |
| MYC | hTFtarget | 611 | 626 | - | 10.6184 | 2.46E-05 | 0.0404 | TCTGCCCGCCTCAGCC |
| ZNF143 | hTFtarget | 90 | 103 | + | 12.0789 | 2.46E-05 | 0.0238 | ACTTGTACTCTCAG |
| BCL6 | hTFtarget | 1453 | 1461 | - | 13.3553 | 2.47E-05 | 0.0456 | GGGGAGGAA |
| SMAD1 | database | 1806 | 1817 | + | 12.6126 | 2.48E-05 | 0.047 | TGCCTCTCTTCC |
| SPI1 | hTFtarget | 341 | 352 | - | 12.7105 | 2.48E-05 | 0.0461 | GGGAGGAGGAAC |
| SP1 | database | 1990 | 2000 | - | 12.382 | 2.49E-05 | 0.0228 | AGGGGAGGGAC |
| SUZ12 | hTFtarget | 1913 | 1928 | - | 12.1842 | 2.49E-05 | 0.028 | ACCAGCCCCACCTCCT |
| CEBPA | hTFtarget | 418 | 426 | + | 13.1974 | 2.49E-05 | 0.0473 | CACTTCCTC |
| EOMES | hTFtarget | 99 | 107 | + | 12.6447 | 2.49E-05 | 0.0478 | CTCAGCGGG |
| SMAD1 | database | 1806 | 1817 | + | 12.6061 | 2.49E-05 | 0.0475 | TGCCTCTCTTCC |
| REST | hTFtarget | 1371 | 1382 | - | 11.0909 | 2.50E-05 | 0.0478 | CAGTACCAGGGT |
| REST | hTFtarget | 657 | 670 | + | 7.18571 | 2.50E-05 | 0.0483 | TGGCCAACGTGGTG |
| SPI1 | hTFtarget | 763 | 778 | + | 11.7857 | 2.50E-05 | 0.0387 | GGAGGCGGAGGTTGCA |
| TRIM28 | hTFtarget | 603 | 618 | - | 4.96053 | 2.50E-05 | 0.0458 | CCTCAGCCTCCCAAAG |
| SP1 | database | 758 | 776 | + | 11.9663 | 2.51E-05 | 0.0438 | ACCCGGGAGGCGGAGGTTG |
| AR | hTFtarget | 1474 | 1495 | - | 11.8182 | 2.51E-05 | 0.0496 | AAAGTATAAATAAATAAACACA |
| PCGF2 | hTFtarget | 375 | 396 | + | 12.3684 | 2.51E-05 | 0.0216 | CCCTTCCAGCTCCTACCTGTCT |
| SPI1 | hTFtarget | 763 | 778 | + | 12.0132 | 2.51E-05 | 0.0273 | GGAGGCGGAGGTTGCA |
| EP300 | hTFtarget | 734 | 749 | - | 11.1316 | 2.51E-05 | 0.0303 | TTCTTCTGCCTCAGCC |
| BHLHE40 | hTFtarget | 1909 | 1920 | - | 12.0658 | 2.52E-05 | 0.0416 | CACCTCCTCCCA |
| EOMES | hTFtarget | 99 | 107 | - | 12.6286 | 2.52E-05 | 0.0473 | CCCGCTGAG |
| REST | hTFtarget | 1570 | 1581 | - | 11.0758 | 2.53E-05 | 0.0478 | CAGCACTTTGGC |
| TFAP2A | hTFtarget | 1254 | 1269 | + | 12.6061 | 2.53E-05 | 0.0341 | TGGCCTTGAGGGTAGA |
| ESR1 | hTFtarget | 417 | 427 | - | 11.9254 | 2.54E-05 | 0.0321 | AGAGGAAGTGA |
| FLI1 | hTFtarget | 1037 | 1061 | + | 4.74242 | 2.54E-05 | 0.0415 | AAGAACAGAAGGCAGGGGGCCAGTT |
| GTF3C2 | hTFtarget | 730 | 745 | - | 10.6627 | 2.54E-05 | 0.0231 | TCTGCCTCAGCCTCAC |
| BCL11A | hTFtarget | 99 | 107 | + | 12.9 | 2.55E-05 | 0.0472 | CTCAGCGGG |
| TFAP2C | hTFtarget | 1359 | 1370 | + | 12.697 | 2.55E-05 | 0.0316 | TGGCCGGAGGGC |
| SPI1 | hTFtarget | 608 | 629 | + | 9.9 | 2.56E-05 | 0.031 | GGAGGCTGAGGCGGGCAGATCA |
| RUNX1 | hTFtarget | 1069 | 1083 | + | 12.5921 | 2.57E-05 | 0.0494 | TAACTTCCCTTGTTT |
| SPI1 | hTFtarget | 1000 | 1015 | + | 12.4605 | 2.57E-05 | 0.0496 | CTGGCTCCCTTTCTAG |
| SPI1 | hTFtarget | 800 | 824 | + | 11.6184 | 2.57E-05 | 0.0465 | GCACTCTAGCCTGGGTGACAGAGTG |
| SPI1 | hTFtarget | 341 | 352 | - | 12.6842 | 2.59E-05 | 0.0393 | GGGAGGAGGAAC |
| SPI1 | hTFtarget | 1985 | 2000 | - | 12.1429 | 2.59E-05 | 0.0286 | AGGGGAGGGACAACGA |
| ZNF143 | hTFtarget | 60 | 74 | + | 11.0658 | 2.59E-05 | 0.0477 | GGGAAACGGTAGTCC |
| FLI1 | hTFtarget | 281 | 296 | + | -17.3182 | 2.60E-05 | 0.0482 | CCTCCTTACTGGCTCC |
| SOX2 | hTFtarget | 1428 | 1436 | + | 13.0132 | 2.60E-05 | 0.0433 | GCCAGCAGG |
| REST | hTFtarget | 1567 | 1582 | + | 1.62121 | 2.61E-05 | 0.0498 | TTGGCCAAAGTGCTGG |
| SPI1 | hTFtarget | 1985 | 2000 | - | 12.4571 | 2.61E-05 | 0.021 | AGGGGAGGGACAACGA |
| SPI1 | hTFtarget | 275 | 286 | - | 12.4079 | 2.61E-05 | 0.0329 | AGGAGGCAGGAC |
| SPI1 | hTFtarget | 760 | 775 | - | 11.8286 | 2.62E-05 | 0.0496 | AACCTCCGCCTCCCGG |
| E2F7 | hTFtarget | 1320 | 1335 | + | 10.3553 | 2.62E-05 | 0.0323 | GTCCATCCCCAGCCAC |
| FLI1 | hTFtarget | 1031 | 1052 | - | -6.57143 | 2.63E-05 | 0.031 | CCTGCCTTCTGTTCTTCACTCC |
| IRF5 | hTFtarget | 1756 | 1774 | + | 7.78947 | 2.63E-05 | 0.0239 | AGGTCCAGCTCAGTCTCCC |
| BRD4 | hTFtarget | 1811 | 1822 | + | 12.5395 | 2.63E-05 | 0.049 | CTCTTCCTCTGG |
| SPI1 | hTFtarget | 1913 | 1930 | - | 11.6447 | 2.64E-05 | 0.0325 | TAACCAGCCCCACCTCCT |
| ESR1 | hTFtarget | 813 | 837 | + | 11.403 | 2.65E-05 | 0.0339 | GGTGACAGAGTGAGACTGAGTCTCA |
| SPI1 | hTFtarget | 760 | 775 | + | 12.0658 | 2.65E-05 | 0.0472 | CCGGGAGGCGGAGGTT |
| USF2 | hTFtarget | 341 | 352 | - | 12.0429 | 2.65E-05 | 0.0329 | GGGAGGAGGAAC |
| NANOG | hTFtarget | 1428 | 1436 | + | 12.6053 | 2.66E-05 | 0.0325 | GCCAGCAGG |
| POLR2A | hTFtarget | 766 | 780 | - | 10.9737 | 2.66E-05 | 0.0482 | ACTGCAACCTCCGCC |
| SOX2 | hTFtarget | 99 | 107 | - | 12.9605 | 2.66E-05 | 0.0478 | CCCGCTGAG |
| SPI1 | hTFtarget | 271 | 286 | + | 12.3714 | 2.66E-05 | 0.0337 | CACAGTCCTGCCTCCT |
| MAZ | hTFtarget | 337 | 352 | + | 11.803 | 2.67E-05 | 0.0267 | CACTGTTCCTCCTCCC |
| BRD4 | hTFtarget | 1035 | 1056 | - | 11.974 | 2.67E-05 | 0.0242 | GCCCCCTGCCTTCTGTTCTTCA |
| BTAF1 | hTFtarget | 1913 | 1924 | + | 12.4868 | 2.67E-05 | 0.0232 | AGGAGGTGGGGC |
| SPI1 | hTFtarget | 341 | 352 | - | 12.8026 | 2.67E-05 | 0.0474 | GGGAGGAGGAAC |
| MED1 | hTFtarget | 395 | 410 | - | 12.4366 | 2.68E-05 | 0.0432 | AGTGGAGAAGTAAAAG |
| PCGF2 | hTFtarget | 1720 | 1741 | - | 12.3684 | 2.69E-05 | 0.0461 | CCCTCAGGCTTCCCCCATGCCC |
| GABPA | hTFtarget | 763 | 774 | - | 11.0395 | 2.71E-05 | 0.0491 | ACCTCCGCCTCC |
| GLYR1 | hTFtarget | 826 | 845 | + | 9.42169 | 2.71E-05 | 0.0358 | GACTGAGTCTCAAAAAAAAG |
| KLF4 | hTFtarget | 1734 | 1745 | + | 11.7895 | 2.71E-05 | 0.0316 | CCTGAGGGATGC |
| SPI1 | hTFtarget | 1908 | 1923 | - | 12.2632 | 2.71E-05 | 0.0381 | CCCCACCTCCTCCCAC |
| ZFP42 | hTFtarget | 1990 | 2000 | + | 11.2763 | 2.71E-05 | 0.0343 | GTCCCTCCCCT |
| MAZ | database | 1387 | 1400 | + | 12.3034 | 2.72E-05 | 0.0368 | ATGGGTGGGAAGCA |
| SMAD3 | hTFtarget | 1428 | 1436 | + | 12.4605 | 2.72E-05 | 0.0467 | GCCAGCAGG |
| TFAP2A | hTFtarget | 1357 | 1372 | - | 12.4848 | 2.73E-05 | 0.0341 | GTGCCCTCCGGCCACT |
| TFAP2A | database | 1357 | 1371 | + | 12.4364 | 2.74E-05 | 0.0461 | AGTGGCCGGAGGGCA |
| REST | hTFtarget | 1967 | 1982 | + | 2.84848 | 2.74E-05 | 0.0387 | CTGGCTCTGGCCCTGG |
| TFAP2C | hTFtarget | 1732 | 1743 | + | 12.5758 | 2.74E-05 | 0.025 | AGCCTGAGGGAT |
| ZFP42 | hTFtarget | 763 | 773 | - | 11.2632 | 2.74E-05 | 0.0343 | CCTCCGCCTCC |
| IRF3 | hTFtarget | 1793 | 1814 | + | 12.0921 | 2.75E-05 | 0.0349 | TGGGTGACAATGATGCCTCTCT |
| SP2 | hTFtarget | 273 | 286 | + | 12.4429 | 2.77E-05 | 0.0345 | CAGTCCTGCCTCCT |
| YY1 | hTFtarget | 734 | 749 | - | 10.7105 | 2.77E-05 | 0.0469 | TTCTTCTGCCTCAGCC |
| REST | hTFtarget | 1967 | 1982 | + | 3.06061 | 2.78E-05 | 0.043 | CTGGCTCTGGCCCTGG |
| ARNT | hTFtarget | 6 | 21 | - | 12.1294 | 2.79E-05 | 0.0497 | TGTATTACTTTGTTTG |
| IRF3 | hTFtarget | 275 | 286 | - | 12.3816 | 2.79E-05 | 0.0348 | AGGAGGCAGGAC |
| SPI1 | hTFtarget | 1914 | 1929 | + | 12.3286 | 2.82E-05 | 0.021 | GGAGGTGGGGCTGGTT |
| SPI1 | hTFtarget | 1908 | 1923 | + | 11.8714 | 2.82E-05 | 0.035 | GTGGGAGGAGGTGGGG |
| GATA3 | hTFtarget | 1810 | 1821 | - | 12.4714 | 2.85E-05 | 0.0434 | CAGAGGAAGAGA |
| ZBTB7B | database | 1720 | 1741 | + | 8.68367 | 2.86E-05 | 0.0441 | GGGCATGGGGGAAGCCTGAGGG |
| KLF5 | hTFtarget | 345 | 353 | + | 13.2105 | 2.86E-05 | 0.0395 | CTCCTCCCT |
| BTAF1 | hTFtarget | 114 | 138 | + | 1.39474 | 2.86E-05 | 0.0387 | GGTGTTCAGCCTGTCCCCCACCCAC |
| GLYR1 | hTFtarget | 1931 | 1950 | + | 8.91463 | 2.87E-05 | 0.0222 | ATGTTTGTCTGGTTCCTCTT |
| GTF2I | hTFtarget | 1255 | 1270 | - | 12.1429 | 2.88E-05 | 0.027 | TTCTACCCTCAAGGCC |
| KDM1A | hTFtarget | 1737 | 1758 | + | 11.4789 | 2.88E-05 | 0.0203 | GAGGGATGCTGAGGAGCACAGG |
| NANOG | hTFtarget | 1428 | 1436 | + | 12.0143 | 2.88E-05 | 0.0342 | GCCAGCAGG |
| IRF3 | hTFtarget | 763 | 774 | + | 12.2237 | 2.89E-05 | 0.0362 | GGAGGCGGAGGT |
| SPI1 | hTFtarget | 1989 | 2000 | + | 12.3286 | 2.90E-05 | 0.0362 | TGTCCCTCCCCT |
| IRF4 | hTFtarget | 1033 | 1048 | - | 11.7143 | 2.91E-05 | 0.0372 | CCTTCTGTTCTTCACT |
| SPI1 | hTFtarget | 123 | 138 | - | 11.7237 | 2.91E-05 | 0.0273 | GTGGGTGGGGGACAGG |
| ERG | hTFtarget | 1028 | 1052 | - | -19.5132 | 2.91E-05 | 0.0212 | CCTGCCTTCTGTTCTTCACTCCAGC |
| SPI1 | hTFtarget | 1914 | 1929 | + | 11.9143 | 2.92E-05 | 0.0286 | GGAGGTGGGGCTGGTT |
| E2F7 | hTFtarget | 1909 | 1920 | - | 11.8289 | 2.92E-05 | 0.0384 | CACCTCCTCCCA |
| SPI1 | hTFtarget | 1908 | 1923 | + | 11.7105 | 2.93E-05 | 0.0273 | GTGGGAGGAGGTGGGG |
| SPI1 | hTFtarget | 1808 | 1819 | + | 12.3289 | 2.93E-05 | 0.0372 | CCTCTCTTCCTC |
| ESR1 | hTFtarget | 807 | 831 | + | 11.209 | 2.96E-05 | 0.0339 | AGCCTGGGTGACAGAGTGAGACTGA |
| GTF2B | hTFtarget | 341 | 352 | + | 11.9474 | 2.96E-05 | 0.0371 | GTTCCTCCTCCC |
| RELA | hTFtarget | 1036 | 1047 | - | 12.6316 | 2.96E-05 | 0.0391 | CTTCTGTTCTTC |
| SPI1 | hTFtarget | 275 | 286 | - | 12.0526 | 2.96E-05 | 0.048 | AGGAGGCAGGAC |
| CREB1 | hTFtarget | 808 | 832 | - | 11.5878 | 2.96E-05 | 0.041 | CTCAGTCTCACTCTGTCACCCAGGC |
| SP1 | hTFtarget | 611 | 626 | + | 11.6143 | 2.97E-05 | 0.022 | GGCTGAGGCGGGCAGA |
| SP2 | database | 341 | 355 | + | 12.069 | 2.99E-05 | 0.0281 | GTTCCTCCTCCCTGG |
| OTX2 | hTFtarget | 99 | 107 | + | 12.9605 | 2.99E-05 | 0.0396 | CTCAGCGGG |
| POLR2A | hTFtarget | 764 | 775 | + | 11.7632 | 2.99E-05 | 0.0391 | GAGGCGGAGGTT |
| MAZ | database | 1914 | 1927 | + | 12.1348 | 3.00E-05 | 0.0368 | GGAGGTGGGGCTGG |
| GTF3C2 | hTFtarget | 630 | 651 | + | 10.6184 | 3.00E-05 | 0.0384 | CTTGAGGTCAGGAGTTCGAGAC |
| STAT1 | hTFtarget | 1557 | 1568 | - | 11.75 | 3.01E-05 | 0.0382 | AAGGCGGGAGGA |
| RFX2 | hTFtarget | 341 | 352 | - | 11.2763 | 3.02E-05 | 0.0378 | GGGAGGAGGAAC |
| BRD7 | hTFtarget | 813 | 834 | + | 10.1923 | 3.02E-05 | 0.0496 | GGTGACAGAGTGAGACTGAGTC |
| REST | hTFtarget | 656 | 671 | + | 2.4697 | 3.03E-05 | 0.0387 | CTGGCCAACGTGGTGA |
| RUNX1 | hTFtarget | 1810 | 1821 | - | 12.3289 | 3.03E-05 | 0.0288 | CAGAGGAAGAGA |
| SPI1 | hTFtarget | 1914 | 1925 | + | 12.1447 | 3.03E-05 | 0.0389 | GGAGGTGGGGCT |
| SUZ12 | hTFtarget | 364 | 379 | + | 11.8158 | 3.03E-05 | 0.028 | CCCGGTCCTTCCCCTT |
| ERG | hTFtarget | 1036 | 1060 | - | -19.7368 | 3.04E-05 | 0.0212 | ACTGGCCCCCTGCCTTCTGTTCTTC |
| BTAF1 | hTFtarget | 257 | 268 | - | 12.1447 | 3.05E-05 | 0.0232 | GAGGGGCTGTGG |
| CHD1 | hTFtarget | 608 | 623 | + | 11.6053 | 3.05E-05 | 0.0337 | GGAGGCTGAGGCGGGC |
| FLI1 | hTFtarget | 1029 | 1053 | + | 4.21212 | 3.06E-05 | 0.0415 | CTGGAGTGAAGAACAGAAGGCAGGG |
| SIN3A | hTFtarget | 1808 | 1823 | - | 12.0921 | 3.06E-05 | 0.0215 | CCCAGAGGAAGAGAGG |
| SPI1 | hTFtarget | 1908 | 1923 | + | 11.8286 | 3.06E-05 | 0.0286 | GTGGGAGGAGGTGGGG |
| ZBTB7B | database | 1720 | 1741 | + | 8.16327 | 3.06E-05 | 0.0472 | GGGCATGGGGGAAGCCTGAGGG |
| SPI1 | hTFtarget | 1908 | 1923 | + | 11.3571 | 3.07E-05 | 0.0387 | GTGGGAGGAGGTGGGG |
| ZNF263 | database | 1451 | 1471 | - | 11.1429 | 3.09E-05 | 0.0173 | AGATGACAATGGGGAGGAAAA |
| SPI1 | hTFtarget | 763 | 774 | + | 12.0921 | 3.11E-05 | 0.0389 | GGAGGCGGAGGT |
| SPI1 | hTFtarget | 1985 | 2000 | - | 11.3286 | 3.11E-05 | 0.0387 | AGGGGAGGGACAACGA |
| SPI1 | hTFtarget | 1985 | 2000 | + | 11.5714 | 3.11E-05 | 0.0386 | TCGTTGTCCCTCCCCT |
| POLR2A | hTFtarget | 992 | 1007 | - | 11.2237 | 3.12E-05 | 0.0331 | GGAGCCAGGGCCTCAG |
| SPI1 | hTFtarget | 762 | 773 | + | 12.3421 | 3.13E-05 | 0.0393 | GGGAGGCGGAGG |
| ESR1 | hTFtarget | 1474 | 1485 | - | 12.4675 | 3.16E-05 | 0.0497 | TAAATAAACACA |
| SPI1 | hTFtarget | 1908 | 1923 | - | 11.1429 | 3.16E-05 | 0.0356 | CCCCACCTCCTCCCAC |
| PAX5 | hTFtarget | 396 | 411 | + | 12.0714 | 3.17E-05 | 0.0478 | TTTTACTTCTCCACTC |
| TFAP2C | hTFtarget | 1730 | 1745 | + | 12.3636 | 3.17E-05 | 0.0305 | GAAGCCTGAGGGATGC |
| ARNT | hTFtarget | 1180 | 1195 | + | 11.9765 | 3.18E-05 | 0.0497 | TGACAGTCTCTGTTTA |
| SPI1 | hTFtarget | 763 | 778 | - | 11.1286 | 3.18E-05 | 0.0356 | TGCAACCTCCGCCTCC |
| TFAP2C | hTFtarget | 1731 | 1744 | - | 12.3182 | 3.19E-05 | 0.0375 | CATCCCTCAGGCTT |
| FLI1 | hTFtarget | 1028 | 1052 | - | -47.5606 | 3.21E-05 | 0.0393 | CCTGCCTTCTGTTCTTCACTCCAGC |
| OTX2 | hTFtarget | 1428 | 1436 | + | 12.7763 | 3.21E-05 | 0.0396 | GCCAGCAGG |
| PRKDC | hTFtarget | 275 | 286 | - | 12.0263 | 3.23E-05 | 0.0406 | AGGAGGCAGGAC |
| SPI1 | hTFtarget | 763 | 778 | - | 11.9474 | 3.25E-05 | 0.0381 | TGCAACCTCCGCCTCC |
| ZNF263 | database | 763 | 783 | + | 11.0408 | 3.26E-05 | 0.0173 | GGAGGCGGAGGTTGCAGTGAG |
| MYC | hTFtarget | 764 | 772 | - | 10.0658 | 3.26E-05 | 0.0385 | CTCCGCCTC |
| SPI1 | hTFtarget | 1914 | 1929 | - | 11.6714 | 3.26E-05 | 0.039 | AACCAGCCCCACCTCC |
| ZNF263 | hTFtarget | 338 | 349 | - | 11.1429 | 3.26E-05 | 0.0418 | AGGAGGAACAGT |
| OTX2 | database | 1299 | 1311 | + | 12.404 | 3.27E-05 | 0.0463 | GATAGGATTAGAA |
| TFAP2C | hTFtarget | 1255 | 1269 | - | 12.2121 | 3.29E-05 | 0.0401 | TCTACCCTCAAGGCC |
| POLR2A | hTFtarget | 731 | 746 | - | 10.8684 | 3.30E-05 | 0.0308 | TTCTGCCTCAGCCTCA |
| SPI1 | hTFtarget | 762 | 777 | + | 11.4868 | 3.31E-05 | 0.0452 | GGGAGGCGGAGGTTGC |
| ZNF143 | hTFtarget | 568 | 583 | + | 11.2632 | 3.31E-05 | 0.0385 | GCAGGGCATGATAGCT |
| NANOG | hTFtarget | 1428 | 1436 | + | 12.5395 | 3.32E-05 | 0.0407 | GCCAGCAGG |
| RBL2 | hTFtarget | 129 | 140 | - | 12.0921 | 3.33E-05 | 0.0357 | TGGTGGGTGGGG |
| SPI1 | hTFtarget | 1914 | 1929 | - | 11.6711 | 3.33E-05 | 0.0418 | AACCAGCCCCACCTCC |
| SPI1 | hTFtarget | 1985 | 2000 | + | 11.6711 | 3.33E-05 | 0.0418 | TCGTTGTCCCTCCCCT |
| STAT3 | hTFtarget | 1991 | 1999 | + | 12.6286 | 3.33E-05 | 0.0437 | TCCCTCCCC |
| TFAP2C | hTFtarget | 1357 | 1372 | - | 12.2879 | 3.33E-05 | 0.0305 | GTGCCCTCCGGCCACT |
| FLI1 | hTFtarget | 1803 | 1818 | - | 11.6567 | 3.35E-05 | 0.0478 | AGGAAGAGAGGCATCA |
| REST | hTFtarget | 656 | 671 | + | 2.37879 | 3.35E-05 | 0.043 | CTGGCCAACGTGGTGA |
| SPI1 | hTFtarget | 762 | 777 | - | 11.9714 | 3.35E-05 | 0.0499 | GCAACCTCCGCCTCCC |
| VEZF1 | hTFtarget | 333 | 354 | + | 10.5714 | 3.36E-05 | 0.0272 | CTCACACTGTTCCTCCTCCCTG |
| SPI1 | hTFtarget | 1985 | 2000 | + | 11.6714 | 3.37E-05 | 0.0426 | TCGTTGTCCCTCCCCT |
| SP2 | database | 610 | 624 | - | 11.8276 | 3.39E-05 | 0.0281 | TGCCCGCCTCAGCCT |
| SP1 | database | 129 | 138 | + | 12.0449 | 3.39E-05 | 0.041 | CCCCACCCAC |
| FOS | hTFtarget | 275 | 286 | - | 11.7632 | 3.39E-05 | 0.0422 | AGGAGGCAGGAC |
| SP1 | hTFtarget | 341 | 352 | - | 12.1429 | 3.39E-05 | 0.0372 | GGGAGGAGGAAC |
| SPI1 | hTFtarget | 1907 | 1922 | + | 12.0286 | 3.39E-05 | 0.0354 | TGTGGGAGGAGGTGGG |
| GTF3C2 | hTFtarget | 1739 | 1754 | - | 10.012 | 3.42E-05 | 0.0231 | TGCTCCTCAGCATCCC |
| MED1 | hTFtarget | 1807 | 1822 | - | 12.1127 | 3.42E-05 | 0.0432 | CCAGAGGAAGAGAGGC |
| SPI1 | hTFtarget | 1914 | 1929 | - | 11.6429 | 3.43E-05 | 0.0426 | AACCAGCCCCACCTCC |
| SPI1 | hTFtarget | 364 | 379 | - | 11.9714 | 3.43E-05 | 0.0431 | AAGGGGAAGGACCGGG |
| SPI1 | hTFtarget | 1985 | 2000 | - | 11.5714 | 3.44E-05 | 0.0266 | AGGGGAGGGACAACGA |
| BTAF1 | hTFtarget | 1903 | 1927 | - | 0.763158 | 3.44E-05 | 0.0387 | CCAGCCCCACCTCCTCCCACATACA |
| TRIM28 | hTFtarget | 1079 | 1094 | - | 10.7632 | 3.44E-05 | 0.0452 | TGGCAGTGGAGAAACA |
| CREB1 | hTFtarget | 402 | 426 | + | 11.3446 | 3.44E-05 | 0.041 | TTCTCCACTCAAACCTCACTTCCTC |
| MYC | hTFtarget | 885 | 900 | + | 11.2632 | 3.45E-05 | 0.0304 | CCTCCTTTGCCACCTG |
| RELA | hTFtarget | 1758 | 1773 | + | 11.9868 | 3.45E-05 | 0.0336 | GTCCAGCTCAGTCTCC |
| MAZ | hTFtarget | 1915 | 1930 | - | 11.0429 | 3.48E-05 | 0.0285 | TAACCAGCCCCACCTC |
| GATA3 | hTFtarget | 1335 | 1346 | + | 12.2143 | 3.50E-05 | 0.0434 | CTCAGGATGTGG |
| ZNF263 | database | 884 | 904 | - | 10.898 | 3.52E-05 | 0.0173 | GGTGCAGGTGGCAAAGGAGGT |
| RAC3 | hTFtarget | 771 | 785 | - | 11.7286 | 3.52E-05 | 0.0457 | GGCTCACTGCAACCT |
| MAZ | hTFtarget | 1401 | 1416 | + | 11.197 | 3.53E-05 | 0.0267 | CTGCCAGCTCCCACCT |
| SMAD3 | hTFtarget | 1428 | 1436 | + | 12.1857 | 3.54E-05 | 0.0443 | GCCAGCAGG |
| SPI1 | hTFtarget | 762 | 773 | + | 11.7143 | 3.54E-05 | 0.0474 | GGGAGGCGGAGG |
| SPI1 | hTFtarget | 1653 | 1668 | - | 11.9342 | 3.56E-05 | 0.0496 | CAGGCTGCCATCCTGG |
| GTF3C2 | hTFtarget | 762 | 777 | - | 9.91566 | 3.58E-05 | 0.0231 | GCAACCTCCGCCTCCC |
| KLF5 | hTFtarget | 1991 | 1999 | + | 12.6053 | 3.58E-05 | 0.0395 | TCCCTCCCC |
| SPI1 | hTFtarget | 1908 | 1923 | + | 11.2857 | 3.58E-05 | 0.0446 | GTGGGAGGAGGTGGGG |
| SPI1 | hTFtarget | 123 | 138 | - | 11.4857 | 3.59E-05 | 0.0266 | GTGGGTGGGGGACAGG |
| SPI1 | hTFtarget | 124 | 139 | - | 11.3026 | 3.59E-05 | 0.0452 | GGTGGGTGGGGGACAG |
| AR | hTFtarget | 335 | 346 | + | 12.4868 | 3.59E-05 | 0.0449 | CACACTGTTCCT |
| MAZ | hTFtarget | 1983 | 1998 | + | 11.1364 | 3.62E-05 | 0.0267 | GTTCGTTGTCCCTCCC |
| NFIC | hTFtarget | 1042 | 1061 | + | 11.7714 | 3.62E-05 | 0.0343 | CAGAAGGCAGGGGGCCAGTT |
| PAX5 | hTFtarget | 1032 | 1047 | - | 11.9048 | 3.62E-05 | 0.0478 | CTTCTGTTCTTCACTC |
| SPI1 | hTFtarget | 128 | 139 | - | 11.8 | 3.63E-05 | 0.0452 | GGTGGGTGGGGG |
| FLI1 | hTFtarget | 373 | 397 | - | 3.71212 | 3.64E-05 | 0.0415 | AAGACAGGTAGGAGCTGGAAGGGGA |
| ESR1 | hTFtarget | 370 | 394 | - | 10.8358 | 3.65E-05 | 0.0339 | ACAGGTAGGAGCTGGAAGGGGAAGG |
| SOX2 | hTFtarget | 99 | 107 | + | 12.5789 | 3.65E-05 | 0.0433 | CTCAGCGGG |
| STAT2 | hTFtarget | 341 | 352 | - | 12.3143 | 3.66E-05 | 0.0278 | GGGAGGAGGAAC |
| MAZ | hTFtarget | 1912 | 1923 | - | 11.7273 | 3.67E-05 | 0.041 | CCCCACCTCCTC |
| ERG | hTFtarget | 327 | 351 | + | -20.7237 | 3.67E-05 | 0.0213 | CCTTCACTCACACTGTTCCTCCTCC |
| ZNF263 | database | 264 | 284 | - | 10.8163 | 3.68E-05 | 0.0173 | GAGGCAGGACTGTGTTGAGGG |
| ZNF263 | database | 328 | 348 | - | 10.8163 | 3.68E-05 | 0.0173 | GGAGGAACAGTGTGAGTGAAG |
| SPI1 | hTFtarget | 1989 | 2000 | + | 11.8553 | 3.68E-05 | 0.0459 | TGTCCCTCCCCT |
| E2F7 | hTFtarget | 761 | 772 | - | 11.3421 | 3.71E-05 | 0.0384 | CTCCGCCTCCCG |
| NFYA | hTFtarget | 128 | 139 | - | 11.8421 | 3.72E-05 | 0.0472 | GGTGGGTGGGGG |
| FLI1 | hTFtarget | 1035 | 1056 | - | -8.02857 | 3.73E-05 | 0.0316 | GCCCCCTGCCTTCTGTTCTTCA |
| GTF3C2 | hTFtarget | 884 | 899 | + | 9.81928 | 3.73E-05 | 0.0231 | ACCTCCTTTGCCACCT |
| SPI1 | hTFtarget | 1908 | 1923 | - | 11.6143 | 3.74E-05 | 0.0346 | CCCCACCTCCTCCCAC |
| MYC | hTFtarget | 1453 | 1461 | + | 9.88158 | 3.75E-05 | 0.0385 | TTCCTCCCC |
| PRKDC | hTFtarget | 613 | 624 | + | 11.6974 | 3.75E-05 | 0.0406 | CTGAGGCGGGCA |
| ARNT | hTFtarget | 1474 | 1489 | + | 11.7765 | 3.76E-05 | 0.0497 | TGTGTTTATTTATTTA |
| SP2 | database | 275 | 289 | + | 11.6207 | 3.77E-05 | 0.0281 | GTCCTGCCTCCTTAC |
| STAT3 | hTFtarget | 1915 | 1923 | - | 12.3857 | 3.77E-05 | 0.0437 | CCCCACCTC |
| RBL2 | hTFtarget | 342 | 353 | - | 11.8289 | 3.78E-05 | 0.0357 | AGGGAGGAGGAA |
| TAF1 | hTFtarget | 1030 | 1053 | + | 11.3684 | 3.79E-05 | 0.0446 | TGGAGTGAAGAACAGAAGGCAGGG |
| TCF12 | hTFtarget | 880 | 895 | - | 11.7368 | 3.79E-05 | 0.0479 | GGCAAAGGAGGTGAAA |
| SPI1 | hTFtarget | 762 | 773 | + | 11.5263 | 3.81E-05 | 0.048 | GGGAGGCGGAGG |
| SPI1 | hTFtarget | 123 | 138 | + | 11.6143 | 3.81E-05 | 0.0286 | CCTGTCCCCCACCCAC |
| KDM1A | hTFtarget | 1907 | 1928 | + | 10.9577 | 3.83E-05 | 0.0207 | TGTGGGAGGAGGTGGGGCTGGT |
| EHF | hTFtarget | 365 | 386 | - | 11.8219 | 3.83E-05 | 0.0464 | GAGCTGGAAGGGGAAGGACCGG |
| CLOCK | hTFtarget | 274 | 285 | + | 12 | 3.84E-05 | 0.0432 | AGTCCTGCCTCC |
| ZNF263 | hTFtarget | 544 | 559 | - | 11.0606 | 3.86E-05 | 0.0438 | TGGAGGAGAGGGGACC |
| SP7 | database | 363 | 382 | - | 11.4495 | 3.86E-05 | 0.0329 | TGGAAGGGGAAGGACCGGGT |
| ZNF263 | database | 545 | 559 | - | 11.5714 | 3.86E-05 | 0.0389 | TGGAGGAGAGGGGAC |
| SP1 | hTFtarget | 128 | 139 | - | 11.9 | 3.88E-05 | 0.0372 | GGTGGGTGGGGG |
| ZNF384 | hTFtarget | 1976 | 2000 | + | 11.3012 | 3.88E-05 | 0.0482 | GCCCTGGGTTCGTTGTCCCTCCCCT |
| SP3 | database | 363 | 382 | - | 11.4495 | 3.89E-05 | 0.0335 | TGGAAGGGGAAGGACCGGGT |
| GTF2I | hTFtarget | 1678 | 1689 | + | 11.5658 | 3.89E-05 | 0.0451 | CCTCTCTGCAGC |
| PBX3 | hTFtarget | 614 | 625 | + | 10.7763 | 3.89E-05 | 0.0479 | TGAGGCGGGCAG |
| FLI1 | hTFtarget | 1038 | 1053 | + | 11.4328 | 3.90E-05 | 0.0478 | AGAACAGAAGGCAGGG |
| TRIM28 | hTFtarget | 548 | 563 | + | 3.61842 | 3.90E-05 | 0.0458 | CCCTCTCCTCCAGAAG |
| POLR2A | hTFtarget | 1558 | 1573 | - | 10.8289 | 3.91E-05 | 0.0416 | TGGCCAAGGCGGGAGG |
| SPI1 | hTFtarget | 271 | 286 | + | 11.7143 | 3.91E-05 | 0.0499 | CACAGTCCTGCCTCCT |
| SP1 | database | 341 | 351 | + | 12.0385 | 3.92E-05 | 0.0259 | GTTCCTCCTCC |
| NANOG | hTFtarget | 1428 | 1436 | + | 12.6447 | 3.92E-05 | 0.0482 | GCCAGCAGG |
| STAT3 | hTFtarget | 1967 | 1978 | - | 12.0143 | 3.92E-05 | 0.0488 | GGCCAGAGCCAG |
| RELA | hTFtarget | 1908 | 1923 | - | 11.7763 | 3.93E-05 | 0.0336 | CCCCACCTCCTCCCAC |
| SOX2 | hTFtarget | 1428 | 1436 | + | 12.1711 | 3.93E-05 | 0.0474 | GCCAGCAGG |
| TCF12 | hTFtarget | 372 | 387 | - | 11.6711 | 3.95E-05 | 0.0479 | GGAGCTGGAAGGGGAA |
| MAZ | hTFtarget | 338 | 353 | + | 10.9545 | 4.00E-05 | 0.0269 | ACTGTTCCTCCTCCCT |
| SPI1 | hTFtarget | 128 | 139 | - | 11.4714 | 4.03E-05 | 0.0474 | GGTGGGTGGGGG |
| TFAP2C | hTFtarget | 1358 | 1371 | + | 11.9697 | 4.05E-05 | 0.0375 | GTGGCCGGAGGGCA |
| MAZ | hTFtarget | 129 | 140 | + | 11.4697 | 4.06E-05 | 0.041 | CCCCACCCACCA |
| SPI1 | hTFtarget | 364 | 379 | - | 11.7143 | 4.08E-05 | 0.0354 | AAGGGGAAGGACCGGG |
| GTF2I | hTFtarget | 470 | 481 | + | 11.5132 | 4.10E-05 | 0.0451 | CTTCTCTGGACT |
| TFAP2C | hTFtarget | 1731 | 1742 | - | 11.9394 | 4.10E-05 | 0.0298 | TCCCTCAGGCTT |
| KDM1A | hTFtarget | 370 | 391 | - | 10.831 | 4.11E-05 | 0.0207 | GGTAGGAGCTGGAAGGGGAAGG |
| SMAD4 | hTFtarget | 611 | 626 | + | 10.1268 | 4.14E-05 | 0.0474 | GGCTGAGGCGGGCAGA |
| NFYB | hTFtarget | 129 | 140 | - | 6.01316 | 4.15E-05 | 0.0403 | TGGTGGGTGGGG |
| STAT3 | hTFtarget | 764 | 772 | - | 12.2571 | 4.18E-05 | 0.0437 | CTCCGCCTC |
| SP1 | database | 1908 | 1918 | - | 11.9038 | 4.19E-05 | 0.0259 | CCTCCTCCCAC |
| GTF2I | hTFtarget | 889 | 910 | + | 10.2105 | 4.19E-05 | 0.0317 | CTTTGCCACCTGCACCCAGCAC |
| BTAF1 | hTFtarget | 1627 | 1638 | + | 11.5 | 4.21E-05 | 0.0239 | TAGAGGCTGGGA |
| TRIM28 | hTFtarget | 473 | 488 | + | 3.36842 | 4.23E-05 | 0.0458 | CTCTGGACTCTCTCAG |
| MYC | hTFtarget | 345 | 353 | + | 9.72368 | 4.25E-05 | 0.0385 | CTCCTCCCT |
| KLF5 | hTFtarget | 1453 | 1461 | + | 12.0395 | 4.26E-05 | 0.0395 | TTCCTCCCC |
| ZNF263 | database | 374 | 388 | - | 11.398 | 4.27E-05 | 0.0389 | AGGAGCTGGAAGGGG |
| FOXA2 | hTFtarget | 1353 | 1377 | + | 9.36842 | 4.29E-05 | 0.0398 | AGCAAGTGGCCGGAGGGCACCCTGG |
| TFAP2C | hTFtarget | 1359 | 1373 | - | 11.803 | 4.30E-05 | 0.0401 | GGTGCCCTCCGGCCA |
| PRKDC | hTFtarget | 762 | 773 | + | 11.4079 | 4.35E-05 | 0.0406 | GGGAGGCGGAGG |
| MYC | hTFtarget | 1909 | 1924 | - | 10.8026 | 4.36E-05 | 0.0308 | GCCCCACCTCCTCCCA |
| EWSR1 | hTFtarget | 431 | 450 | - | 6.16129 | 4.37E-05 | 0.0318 | GAAGTAATCAGGGAAGGCTT |
| MAZ | hTFtarget | 1912 | 1927 | - | 10.7576 | 4.37E-05 | 0.0269 | CCAGCCCCACCTCCTC |
| E2F4 | hTFtarget | 128 | 139 | - | 11.2763 | 4.39E-05 | 0.0457 | GGTGGGTGGGGG |
| BTAF1 | hTFtarget | 341 | 352 | - | 11.4211 | 4.40E-05 | 0.0239 | GGGAGGAGGAAC |
| VEZF1 | hTFtarget | 1719 | 1740 | - | 10.0143 | 4.40E-05 | 0.0272 | CCTCAGGCTTCCCCCATGCCCT |
| FLI1 | hTFtarget | 1063 | 1087 | + | -25.7 | 4.45E-05 | 0.0387 | CTCTGCTAACTTCCCTTGTTTCTCC |
| FLI1 | hTFtarget | 276 | 297 | + | -8.78571 | 4.46E-05 | 0.0316 | TCCTGCCTCCTTACTGGCTCCC |
| MYC | hTFtarget | 1911 | 1926 | - | 9.28947 | 4.46E-05 | 0.0487 | CAGCCCCACCTCCTCC |
| SP1 | hTFtarget | 120 | 135 | - | 10.8429 | 4.46E-05 | 0.0242 | GGTGGGGGACAGGCTG |
| ZNF384 | hTFtarget | 1726 | 1750 | - | 11.0723 | 4.46E-05 | 0.0482 | CCTCAGCATCCCTCAGGCTTCCCCC |
| NFYA | hTFtarget | 275 | 286 | - | 11.1447 | 4.48E-05 | 0.0498 | AGGAGGCAGGAC |
| OTX2 | database | 589 | 601 | - | 12.0505 | 4.49E-05 | 0.0463 | ACTGGGATTACAG |
| ESR1 | hTFtarget | 1478 | 1489 | - | 12.1039 | 4.49E-05 | 0.0497 | TAAATAAATAAA |
| KLF4 | hTFtarget | 1362 | 1373 | + | 10.7763 | 4.49E-05 | 0.0392 | CCGGAGGGCACC |
| MAZ | hTFtarget | 764 | 779 | - | 10.4143 | 4.49E-05 | 0.0285 | CTGCAACCTCCGCCTC |
| POLR2A | hTFtarget | 1558 | 1572 | + | 9.82895 | 4.55E-05 | 0.0488 | CCTCCCGCCTTGGCC |
| ZNF263 | hTFtarget | 765 | 776 | + | 10.3143 | 4.55E-05 | 0.0438 | AGGCGGAGGTTG |
| SPI1 | hTFtarget | 273 | 288 | - | 10.9868 | 4.58E-05 | 0.0472 | TAAGGAGGCAGGACTG |
| SP1 | hTFtarget | 375 | 390 | - | 10.7857 | 4.59E-05 | 0.0242 | GTAGGAGCTGGAAGGG |
| CLOCK | hTFtarget | 1558 | 1569 | + | 11.6579 | 4.59E-05 | 0.0432 | CCTCCCGCCTTG |
| TRIM24 | hTFtarget | 1477 | 1498 | - | 11.2821 | 4.62E-05 | 0.0455 | CAAAAAGTATAAATAAATAAAC |
| MAZ | hTFtarget | 338 | 353 | + | 10.3286 | 4.64E-05 | 0.0285 | ACTGTTCCTCCTCCCT |
| SPI1 | hTFtarget | 1967 | 1982 | + | 11.4868 | 4.65E-05 | 0.0496 | CTGGCTCTGGCCCTGG |
| TFAP2C | hTFtarget | 1709 | 1720 | - | 11.9242 | 4.65E-05 | 0.048 | CTGGCCTTAGGC |
| OTX2 | database | 712 | 724 | - | 12.0101 | 4.66E-05 | 0.0463 | GCTGGGATTACAG |
| OTX2 | database | 1578 | 1590 | + | 12.0101 | 4.66E-05 | 0.0463 | GCTGGGATTACAG |
| CDK8 | hTFtarget | 1404 | 1428 | + | 10.6623 | 4.66E-05 | 0.0499 | CCAGCTCCCACCTTGACCTCAGGTG |
| TFAP2A | database | 1255 | 1269 | - | 11.5273 | 4.69E-05 | 0.0461 | TCTACCCTCAAGGCC |
| SPI1 | hTFtarget | 1914 | 1929 | + | 10.4143 | 4.69E-05 | 0.0437 | GGAGGTGGGGCTGGTT |
| SMAD4 | hTFtarget | 763 | 778 | + | 9.85915 | 4.70E-05 | 0.0474 | GGAGGCGGAGGTTGCA |
| SPI1 | hTFtarget | 123 | 138 | + | 10.2714 | 4.71E-05 | 0.0356 | CCTGTCCCCCACCCAC |
| ZNF143 | hTFtarget | 1419 | 1432 | + | 10.6974 | 4.72E-05 | 0.0366 | ACCTCAGGTGCCAG |
| ZNF263 | hTFtarget | 607 | 622 | + | 10.6515 | 4.73E-05 | 0.0438 | GGGAGGCTGAGGCGGG |
| MAZ | hTFtarget | 345 | 356 | + | 11.0606 | 4.76E-05 | 0.041 | CTCCTCCCTGGA |
| SPI1 | hTFtarget | 1907 | 1922 | - | 11.3026 | 4.78E-05 | 0.049 | CCCACCTCCTCCCACA |
| EP300 | hTFtarget | 371 | 386 | + | 11.4429 | 4.78E-05 | 0.0276 | CTTCCCCTTCCAGCTC |
| GTF2I | hTFtarget | 980 | 991 | - | 11.1447 | 4.80E-05 | 0.0451 | CTTCCCTTAGCC |
| SPI1 | hTFtarget | 1985 | 2000 | + | 10.2286 | 4.80E-05 | 0.0356 | TCGTTGTCCCTCCCCT |
| MED1 | hTFtarget | 839 | 854 | + | 11.6338 | 4.81E-05 | 0.0451 | AAAAAAGAAGTTGATA |
| VEZF1 | hTFtarget | 366 | 387 | + | 9.82857 | 4.81E-05 | 0.0272 | CGGTCCTTCCCCTTCCAGCTCC |
| TFAP2C | hTFtarget | 1730 | 1741 | + | 11.697 | 4.82E-05 | 0.0499 | GAAGCCTGAGGG |
| IRF5 | hTFtarget | 370 | 388 | + | 6.09211 | 4.85E-05 | 0.0353 | CCTTCCCCTTCCAGCTCCT |
| RCOR1 | hTFtarget | 1415 | 1430 | + | 10.5634 | 4.85E-05 | 0.0403 | CTTGACCTCAGGTGCC |
| TFAP2C | hTFtarget | 1730 | 1745 | - | 11.5152 | 4.86E-05 | 0.0453 | GCATCCCTCAGGCTTC |
| TRIM28 | hTFtarget | 888 | 903 | + | 2.92105 | 4.87E-05 | 0.0458 | CCTTTGCCACCTGCAC |
| SP1 | database | 1908 | 1917 | - | 11.5506 | 4.91E-05 | 0.0445 | CTCCTCCCAC |
| SPI1 | hTFtarget | 1907 | 1922 | - | 10.9429 | 4.95E-05 | 0.048 | CCCACCTCCTCCCACA |
| RCOR1 | hTFtarget | 608 | 623 | - | 10.5211 | 4.96E-05 | 0.0403 | GCCCGCCTCAGCCTCC |
| SPI1 | hTFtarget | 341 | 352 | - | 11.6429 | 4.96E-05 | 0.0465 | GGGAGGAGGAAC |
| E2F4 | hTFtarget | 1559 | 1570 | - | 11.0132 | 4.96E-05 | 0.0457 | CCAAGGCGGGAG |
| SPI1 | hTFtarget | 123 | 138 | + | 10.8 | 4.97E-05 | 0.039 | CCTGTCCCCCACCCAC |
| RELA | hTFtarget | 1714 | 1729 | - | 11.3816 | 4.99E-05 | 0.0341 | CCCCATGCCCTGGCCT |
| ESR1 | hTFtarget | 2 | 13 | + | 11.9091 | 5.00E-05 | 0.0497 | AGATCAAACAAA |
| BHLHE40 | hTFtarget | 339 | 350 | + | 10.4737 | 5.00E-05 | 0.0416 | CTGTTCCTCCTC |
| SPI1 | hTFtarget | 366 | 381 | - | 10.8026 | 5.01E-05 | 0.0472 | GGAAGGGGAAGGACCG |
| SPI1 | hTFtarget | 275 | 286 | - | 11.0286 | 5.02E-05 | 0.0474 | AGGAGGCAGGAC |
| STAT3 | hTFtarget | 345 | 353 | + | 12.0571 | 5.04E-05 | 0.0437 | CTCCTCCCT |
| GTF2I | hTFtarget | 278 | 286 | + | 11.9286 | 5.05E-05 | 0.0365 | CTGCCTCCT |
| SPI1 | hTFtarget | 123 | 138 | + | 11.1286 | 5.09E-05 | 0.0428 | CCTGTCCCCCACCCAC |
| ZNF143 | hTFtarget | 369 | 388 | + | 9.77143 | 5.09E-05 | 0.0417 | TCCTTCCCCTTCCAGCTCCT |
| SPI1 | hTFtarget | 339 | 354 | + | 11.1316 | 5.10E-05 | 0.0448 | CTGTTCCTCCTCCCTG |
| BHLHE40 | hTFtarget | 1915 | 1926 | - | 10.4211 | 5.12E-05 | 0.0416 | CAGCCCCACCTC |
| STAT1 | hTFtarget | 881 | 892 | - | 10.7632 | 5.12E-05 | 0.0488 | AAAGGAGGTGAA |
| FOS | hTFtarget | 128 | 139 | - | 10.9079 | 5.14E-05 | 0.0481 | GGTGGGTGGGGG |
| NFIC | hTFtarget | 1948 | 1967 | - | 11.1143 | 5.14E-05 | 0.0389 | GAAATGGCCCACAGCCCAAG |
| ESR1 | hTFtarget | 305 | 329 | - | 10.209 | 5.15E-05 | 0.0383 | AGGCACAGAGTAGGAACGAGCAAGG |
| SPI1 | hTFtarget | 124 | 139 | + | 10.8571 | 5.17E-05 | 0.048 | CTGTCCCCCACCCACC |
| MYC | hTFtarget | 1915 | 1923 | - | 8.68421 | 5.19E-05 | 0.0385 | CCCCACCTC |
| SPI1 | hTFtarget | 1908 | 1923 | - | 10.7 | 5.20E-05 | 0.039 | CCCCACCTCCTCCCAC |
| TCF12 | hTFtarget | 396 | 411 | - | 11.2368 | 5.21E-05 | 0.0479 | GAGTGGAGAAGTAAAA |
| SP1 | hTFtarget | 1602 | 1617 | - | 10.5286 | 5.23E-05 | 0.0242 | GACAGGGCCGGGCATG |
| SPI1 | hTFtarget | 341 | 352 | - | 11 | 5.25E-05 | 0.0495 | GGGAGGAGGAAC |
| EP300 | hTFtarget | 335 | 350 | + | 11.3143 | 5.25E-05 | 0.0276 | CACACTGTTCCTCCTC |
| SPI1 | hTFtarget | 1316 | 1331 | + | 11.2763 | 5.26E-05 | 0.0496 | TTGGGTCCATCCCCAG |
| SPI1 | hTFtarget | 123 | 138 | - | 10.6857 | 5.27E-05 | 0.0406 | GTGGGTGGGGGACAGG |
| SPI1 | hTFtarget | 124 | 139 | - | 11.2571 | 5.28E-05 | 0.0354 | GGTGGGTGGGGGACAG |
| GTF2B | hTFtarget | 128 | 139 | + | 10.8421 | 5.29E-05 | 0.0498 | CCCCCACCCACC |
| GTF2I | hTFtarget | 1811 | 1832 | + | 9.72368 | 5.31E-05 | 0.0335 | CTCTTCCTCTGGGACAAGGCAG |
| BRCA1 | hTFtarget | 341 | 352 | + | 10.5526 | 5.31E-05 | 0.0497 | GTTCCTCCTCCC |
| SPI1 | hTFtarget | 123 | 138 | + | 10.9286 | 5.34E-05 | 0.0396 | CCTGTCCCCCACCCAC |
| NFYA | hTFtarget | 613 | 624 | + | 10.7237 | 5.36E-05 | 0.0498 | CTGAGGCGGGCA |
| EWSR1 | hTFtarget | 274 | 298 | - | -14.2424 | 5.38E-05 | 0.0483 | TGGGAGCCAGTAAGGAGGCAGGACT |
| TFAP2C | hTFtarget | 1254 | 1267 | + | 11.5303 | 5.39E-05 | 0.04 | TGGCCTTGAGGGTA |
| SP1 | database | 1908 | 1918 | + | 11.1236 | 5.40E-05 | 0.0396 | GTGGGAGGAGG |
| MYB | hTFtarget | 1335 | 1346 | - | 11.7632 | 5.40E-05 | 0.0449 | CCACATCCTGAG |
| POLR2A | hTFtarget | 731 | 745 | - | 9.44737 | 5.40E-05 | 0.0488 | TCTGCCTCAGCCTCA |
| TFAP2C | hTFtarget | 1358 | 1369 | + | 11.6515 | 5.41E-05 | 0.048 | GTGGCCGGAGGG |
| SPI1 | hTFtarget | 1914 | 1929 | + | 10.6286 | 5.42E-05 | 0.0406 | GGAGGTGGGGCTGGTT |
| GTF3C2 | hTFtarget | 763 | 784 | - | 10.1566 | 5.45E-05 | 0.0353 | GCTCACTGCAACCTCCGCCTCC |
| USF2 | hTFtarget | 344 | 355 | - | 10.4143 | 5.46E-05 | 0.0419 | CCAGGGAGGAGG |
| SIN3A | hTFtarget | 756 | 771 | + | 11.0658 | 5.49E-05 | 0.0321 | GAACCCGGGAGGCGGA |
| ERG | hTFtarget | 1063 | 1087 | + | -22.9079 | 5.52E-05 | 0.0275 | CTCTGCTAACTTCCCTTGTTTCTCC |
| SP3 | database | 123 | 142 | - | 10.8532 | 5.54E-05 | 0.0381 | CATGGTGGGTGGGGGACAGG |
| POLR2A | hTFtarget | 1821 | 1836 | + | 10.1053 | 5.57E-05 | 0.0416 | GGGACAAGGCAGTGAC |
| BRD4 | hTFtarget | 605 | 626 | - | 10.7403 | 5.57E-05 | 0.0405 | TCTGCCCGCCTCAGCCTCCCAA |
| KDM1A | hTFtarget | 363 | 384 | - | 10.2535 | 5.59E-05 | 0.0247 | GCTGGAAGGGGAAGGACCGGGT |
| POLR2A | hTFtarget | 768 | 783 | + | 10.0921 | 5.61E-05 | 0.0416 | CGGAGGTTGCAGTGAG |
| MAZ | hTFtarget | 1560 | 1571 | + | 10.6212 | 5.62E-05 | 0.041 | TCCCGCCTTGGC |
| BHLHE40 | hTFtarget | 342 | 353 | + | 10.1842 | 5.63E-05 | 0.0416 | TTCCTCCTCCCT |
| RCOR1 | hTFtarget | 731 | 746 | - | 10.2817 | 5.63E-05 | 0.0403 | TTCTGCCTCAGCCTCA |
| USF2 | hTFtarget | 128 | 139 | - | 10.3143 | 5.63E-05 | 0.0419 | GGTGGGTGGGGG |
| SPI1 | hTFtarget | 124 | 139 | + | 11.0143 | 5.64E-05 | 0.0445 | CTGTCCCCCACCCACC |
| SP7 | database | 123 | 142 | - | 10.8165 | 5.65E-05 | 0.0385 | CATGGTGGGTGGGGGACAGG |
| SPI1 | hTFtarget | 271 | 286 | - | 11.1286 | 5.67E-05 | 0.0354 | AGGAGGCAGGACTGTG |
| SPI1 | hTFtarget | 1908 | 1923 | - | 10.9143 | 5.69E-05 | 0.0428 | CCCCACCTCCTCCCAC |
| POLR2A | hTFtarget | 884 | 898 | - | 9.5 | 5.72E-05 | 0.0464 | GGTGGCAAAGGAGGT |
| PURA | database | 364 | 380 | - | 11.2178 | 5.76E-05 | 0.0459 | GAAGGGGAAGGACCGGG |
| STAT3 | hTFtarget | 129 | 137 | + | 11.7571 | 5.76E-05 | 0.0437 | CCCCACCCA |
| PURA | database | 364 | 380 | + | 11.198 | 5.81E-05 | 0.0461 | CCCGGTCCTTCCCCTTC |
| E2F7 | hTFtarget | 342 | 353 | + | 10.2895 | 5.82E-05 | 0.0384 | TTCCTCCTCCCT |
| ZNF384 | hTFtarget | 539 | 563 | + | 10.6265 | 5.83E-05 | 0.0482 | GTCTTGGTCCCCTCTCCTCCAGAAG |
| MYB | hTFtarget | 882 | 893 | + | 11.6447 | 5.84E-05 | 0.0449 | TCACCTCCTTTG |
| MYB | hTFtarget | 1810 | 1821 | + | 11.6447 | 5.84E-05 | 0.0449 | TCTCTTCCTCTG |
| FLI1 | hTFtarget | 275 | 299 | - | 2.31818 | 5.85E-05 | 0.0415 | CTGGGAGCCAGTAAGGAGGCAGGAC |
| TRIM24 | hTFtarget | 1754 | 1775 | - | 8.59211 | 5.85E-05 | 0.0382 | TGGGAGACTGAGCTGGACCTGT |
| FLI1 | hTFtarget | 330 | 354 | - | 2.28788 | 5.91E-05 | 0.0415 | CAGGGAGGAGGAACAGTGTGAGTGA |
| POLR2A | hTFtarget | 731 | 745 | + | 9.42105 | 5.93E-05 | 0.0464 | TGAGGCTGAGGCAGA |
| LMNB1 | hTFtarget | 1321 | 1336 | + | 6.54878 | 5.94E-05 | 0.0278 | TCCATCCCCAGCCACT |
| MED1 | hTFtarget | 1033 | 1048 | + | 11.3239 | 5.94E-05 | 0.0451 | AGTGAAGAACAGAAGG |
| SPI1 | hTFtarget | 271 | 286 | + | 10.9 | 5.98E-05 | 0.0445 | CACAGTCCTGCCTCCT |
| STAT2 | hTFtarget | 344 | 355 | - | 11.6429 | 5.99E-05 | 0.0379 | CCAGGGAGGAGG |
| GTF3C2 | hTFtarget | 708 | 729 | + | 10.7308 | 6.04E-05 | 0.0478 | GCGCCTGTAATCCCAGCTACTC |
| GTF3C2 | hTFtarget | 1240 | 1261 | + | 9.96386 | 6.04E-05 | 0.0353 | CAGTTCAACTGCCTTGGCCTTG |
| TFAP2A | database | 1359 | 1373 | - | 11.0545 | 6.09E-05 | 0.0461 | GGTGCCCTCCGGCCA |
| PURA | database | 607 | 623 | + | 11.1287 | 6.12E-05 | 0.0459 | GGGAGGCTGAGGCGGGC |
| SPI1 | hTFtarget | 611 | 626 | - | 10.4857 | 6.12E-05 | 0.0496 | TCTGCCCGCCTCAGCC |
| TFAP2C | hTFtarget | 1733 | 1744 | - | 11.3182 | 6.13E-05 | 0.0499 | CATCCCTCAGGC |
| PURA | database | 607 | 623 | - | 11.1188 | 6.13E-05 | 0.0461 | GCCCGCCTCAGCCTCCC |
| E2F7 | hTFtarget | 276 | 287 | + | 10.1579 | 6.14E-05 | 0.0384 | TCCTGCCTCCTT |
| E2F7 | hTFtarget | 369 | 380 | + | 10.1579 | 6.14E-05 | 0.0384 | TCCTTCCCCTTC |
| TFAP2A | database | 1729 | 1743 | + | 11.0182 | 6.21E-05 | 0.0461 | GGAAGCCTGAGGGAT |
| IRF5 | hTFtarget | 1578 | 1599 | - | 9.63636 | 6.23E-05 | 0.0481 | GGCTCATGCCTGTAATCCCAGC |
| SPI1 | hTFtarget | 124 | 139 | + | 10.6842 | 6.23E-05 | 0.049 | CTGTCCCCCACCCACC |
| TCF12 | hTFtarget | 1032 | 1047 | + | 10.9474 | 6.23E-05 | 0.0479 | GAGTGAAGAACAGAAG |
| FOXA2 | hTFtarget | 1714 | 1738 | + | 8.52632 | 6.24E-05 | 0.0398 | AGGCCAGGGCATGGGGGAAGCCTGA |
| SUZ12 | hTFtarget | 337 | 352 | + | 10.3158 | 6.30E-05 | 0.0449 | CACTGTTCCTCCTCCC |
| GTF3C2 | hTFtarget | 1594 | 1615 | + | 9.86747 | 6.36E-05 | 0.0353 | TGAGCCACCATGCCCGGCCCTG |
| SPI1 | hTFtarget | 1557 | 1572 | + | 10.4 | 6.37E-05 | 0.0496 | TCCTCCCGCCTTGGCC |
| RCOR1 | hTFtarget | 817 | 832 | - | 10.0423 | 6.38E-05 | 0.0403 | CTCAGTCTCACTCTGT |
| RBL2 | hTFtarget | 1906 | 1917 | + | 10.5789 | 6.39E-05 | 0.0482 | ATGTGGGAGGAG |
| FOXA2 | hTFtarget | 120 | 144 | - | 8.44737 | 6.46E-05 | 0.0398 | ATCATGGTGGGTGGGGGACAGGCTG |
| GLYR1 | hTFtarget | 140 | 159 | + | 6.96341 | 6.46E-05 | 0.0415 | ATGATGTCCAGCTCAGTTTT |
| KLF5 | hTFtarget | 1909 | 1917 | - | 11.1184 | 6.46E-05 | 0.043 | CTCCTCCCA |
| TFAP2C | hTFtarget | 1733 | 1744 | - | 11.3182 | 6.50E-05 | 0.048 | CATCCCTCAGGC |
| SPI1 | hTFtarget | 337 | 352 | + | 10.5789 | 6.51E-05 | 0.049 | CACTGTTCCTCCTCCC |
| GTF2I | hTFtarget | 824 | 839 | - | 10.9714 | 6.53E-05 | 0.038 | TTTGAGACTCAGTCTC |
| E2F4 | hTFtarget | 341 | 352 | - | 10.3816 | 6.56E-05 | 0.0483 | GGGAGGAGGAAC |
| BTAF1 | hTFtarget | 1907 | 1918 | + | 10.6053 | 6.59E-05 | 0.0314 | TGTGGGAGGAGG |
| SPI1 | hTFtarget | 339 | 354 | + | 10.3143 | 6.62E-05 | 0.0496 | CTGTTCCTCCTCCCTG |
| GTF2I | hTFtarget | 1414 | 1429 | + | 10.9429 | 6.65E-05 | 0.038 | CCTTGACCTCAGGTGC |
| ZNF263 | database | 1913 | 1927 | + | 10.5714 | 6.68E-05 | 0.0487 | AGGAGGTGGGGCTGG |
| BTAF1 | hTFtarget | 607 | 631 | - | -1.59211 | 6.71E-05 | 0.0387 | AGTGATCTGCCCGCCTCAGCCTCCC |
| MYC | hTFtarget | 764 | 779 | - | 9.92105 | 6.72E-05 | 0.0392 | CTGCAACCTCCGCCTC |
| TFAP2C | hTFtarget | 1358 | 1369 | + | 11.1667 | 6.76E-05 | 0.0499 | GTGGCCGGAGGG |
| MAZ | hTFtarget | 544 | 559 | + | 9.63636 | 6.78E-05 | 0.0395 | GGTCCCCTCTCCTCCA |
| POLR2A | hTFtarget | 1911 | 1925 | - | 8.93421 | 6.78E-05 | 0.049 | AGCCCCACCTCCTCC |
| TFAP2C | hTFtarget | 1730 | 1741 | + | 11.2424 | 6.82E-05 | 0.048 | GAAGCCTGAGGG |
| FLI1 | hTFtarget | 327 | 351 | + | -28.1429 | 6.95E-05 | 0.0409 | CCTTCACTCACACTGTTCCTCCTCC |
| KLF5 | hTFtarget | 1912 | 1920 | - | 11.0132 | 6.95E-05 | 0.043 | CACCTCCTC |
| FLI1 | hTFtarget | 1059 | 1083 | + | -28.2143 | 7.04E-05 | 0.0409 | GTTTCTCTGCTAACTTCCCTTGTTT |
| BRD4 | hTFtarget | 886 | 907 | + | 10.3247 | 7.05E-05 | 0.0427 | CTCCTTTGCCACCTGCACCCAG |
| SPI1 | hTFtarget | 607 | 622 | - | 10.5571 | 7.08E-05 | 0.0445 | CCCGCCTCAGCCTCCC |
| SPI1 | hTFtarget | 337 | 352 | - | 10.7143 | 7.09E-05 | 0.038 | GGGAGGAGGAACAGTG |
| E2F7 | hTFtarget | 129 | 140 | + | 9.81579 | 7.10E-05 | 0.0384 | CCCCACCCACCA |
| GTF2I | hTFtarget | 1452 | 1467 | + | 10.8429 | 7.11E-05 | 0.038 | TTTCCTCCCCATTGTC |
| KDM1A | hTFtarget | 118 | 139 | - | 9.78873 | 7.12E-05 | 0.028 | GGTGGGTGGGGGACAGGCTGAA |
| SP1 | hTFtarget | 366 | 381 | - | 9.9 | 7.13E-05 | 0.0293 | GGAAGGGGAAGGACCG |
| BTAF1 | hTFtarget | 1906 | 1930 | - | -1.81579 | 7.14E-05 | 0.0387 | TAACCAGCCCCACCTCCTCCCACAT |
| MAZ | hTFtarget | 1912 | 1927 | - | 9.11429 | 7.29E-05 | 0.0384 | CCAGCCCCACCTCCTC |
| GTF3C2 | hTFtarget | 986 | 1001 | - | 8.25301 | 7.39E-05 | 0.0393 | AGGGCCTCAGCTTCCC |
| MAZ | hTFtarget | 765 | 780 | - | 9.37879 | 7.48E-05 | 0.0395 | ACTGCAACCTCCGCCT |
| BTAF1 | hTFtarget | 761 | 785 | - | -2 | 7.51E-05 | 0.0387 | GGCTCACTGCAACCTCCGCCTCCCG |
| BHLHE40 | hTFtarget | 1450 | 1461 | + | 9.36842 | 7.58E-05 | 0.0416 | TTTTTCCTCCCC |
| SP2 | database | 368 | 382 | + | 10.1379 | 7.64E-05 | 0.0378 | GTCCTTCCCCTTCCA |
| SP2 | database | 1559 | 1573 | + | 10.1207 | 7.69E-05 | 0.0378 | CTCCCGCCTTGGCCA |
| USF2 | hTFtarget | 1559 | 1570 | - | 9.54286 | 7.71E-05 | 0.0451 | CCAAGGCGGGAG |
| MYC | hTFtarget | 251 | 266 | + | 9.61842 | 7.76E-05 | 0.0392 | TTTCCTCCACAGCCCC |
| FLI1 | hTFtarget | 1062 | 1086 | - | 1.42424 | 7.87E-05 | 0.0415 | GAGAAACAAGGGAAGTTAGCAGAGA |
| BHLHE40 | hTFtarget | 764 | 775 | - | 9.26316 | 7.87E-05 | 0.0416 | AACCTCCGCCTC |
| BTAF1 | hTFtarget | 1902 | 1926 | - | -2.19737 | 7.92E-05 | 0.0387 | CAGCCCCACCTCCTCCCACATACAA |
| IRF5 | hTFtarget | 762 | 780 | - | 4.64474 | 7.97E-05 | 0.0483 | ACTGCAACCTCCGCCTCCC |
| SUZ12 | hTFtarget | 124 | 139 | + | 9.77632 | 8.02E-05 | 0.0449 | CTGTCCCCCACCCACC |
| SP2 | database | 128 | 142 | + | 10 | 8.11E-05 | 0.0378 | CCCCCACCCACCATG |
| SPI1 | hTFtarget | 1911 | 1926 | + | 9.78571 | 8.11E-05 | 0.0482 | GGAGGAGGTGGGGCTG |
| SIN3A | hTFtarget | 366 | 381 | - | 10.3158 | 8.14E-05 | 0.0408 | GGAAGGGGAAGGACCG |
| FLI1 | hTFtarget | 369 | 393 | - | 1.30303 | 8.18E-05 | 0.0415 | CAGGTAGGAGCTGGAAGGGGAAGGA |
| RELA | hTFtarget | 1599 | 1614 | + | 10.5263 | 8.20E-05 | 0.0467 | CACCATGCCCGGCCCT |
| STAT3 | hTFtarget | 1909 | 1917 | - | 11.1714 | 8.20E-05 | 0.0496 | CTCCTCCCA |
| MAZ | hTFtarget | 545 | 560 | + | 9.24242 | 8.22E-05 | 0.0366 | GTCCCCTCTCCTCCAG |
| GTF3C2 | hTFtarget | 330 | 351 | + | 9.37349 | 8.23E-05 | 0.0354 | TCACTCACACTGTTCCTCCTCC |
| SPI1 | hTFtarget | 337 | 352 | + | 10.2429 | 8.23E-05 | 0.0445 | CACTGTTCCTCCTCCC |
| SPI1 | hTFtarget | 364 | 379 | + | 10.2286 | 8.28E-05 | 0.0445 | CCCGGTCCTTCCCCTT |
| FOXA2 | hTFtarget | 758 | 782 | + | 7.86842 | 8.30E-05 | 0.0398 | ACCCGGGAGGCGGAGGTTGCAGTGA |
| VEZF1 | hTFtarget | 275 | 296 | + | 8.64286 | 8.32E-05 | 0.0357 | GTCCTGCCTCCTTACTGGCTCC |
| VEZF1 | hTFtarget | 760 | 781 | - | 8.61429 | 8.43E-05 | 0.0357 | CACTGCAACCTCCGCCTCCCGG |
| SUZ12 | hTFtarget | 271 | 286 | + | 9.64474 | 8.49E-05 | 0.0449 | CACAGTCCTGCCTCCT |
| USF2 | hTFtarget | 1910 | 1921 | + | 9.24286 | 8.49E-05 | 0.0451 | GGGAGGAGGTGG |
| ZNF263 | database | 1036 | 1056 | + | 9.16327 | 8.54E-05 | 0.0357 | GAAGAACAGAAGGCAGGGGGC |
| MAZ | hTFtarget | 540 | 555 | + | 9.13636 | 8.57E-05 | 0.0366 | TCTTGGTCCCCTCTCC |
| FOXA2 | hTFtarget | 371 | 395 | - | 7.77632 | 8.63E-05 | 0.0398 | GACAGGTAGGAGCTGGAAGGGGAAG |
| MAZ | hTFtarget | 342 | 353 | + | 9.18182 | 8.67E-05 | 0.0494 | TTCCTCCTCCCT |
| MAZ | hTFtarget | 1915 | 1930 | - | 9.0303 | 8.93E-05 | 0.0366 | TAACCAGCCCCACCTC |
| MAZ | hTFtarget | 1916 | 1931 | - | 8.89394 | 8.97E-05 | 0.0414 | TTAACCAGCCCCACCT |
| GTF2I | hTFtarget | 409 | 424 | + | 10.4857 | 8.98E-05 | 0.042 | CTCAAACCTCACTTCC |
| SPI1 | hTFtarget | 363 | 378 | - | 9.55714 | 9.01E-05 | 0.0482 | AGGGGAAGGACCGGGT |
| SP1 | hTFtarget | 1072 | 1087 | - | 9.4 | 9.06E-05 | 0.0335 | GGAGAAACAAGGGAAG |
| STAT2 | hTFtarget | 368 | 379 | - | 11.0286 | 9.06E-05 | 0.0429 | AAGGGGAAGGAC |
| STAT2 | hTFtarget | 1910 | 1921 | + | 11.0286 | 9.06E-05 | 0.0429 | GGGAGGAGGTGG |
| STAT3 | hTFtarget | 1453 | 1461 | + | 10.9714 | 9.15E-05 | 0.0496 | TTCCTCCCC |
| BTAF1 | hTFtarget | 242 | 266 | + | -2.77632 | 9.26E-05 | 0.0396 | GACTGACAGTTTCCTCCACAGCCCC |
| GTF3C2 | hTFtarget | 1752 | 1773 | + | 9.13253 | 9.32E-05 | 0.0354 | GCACAGGTCCAGCTCAGTCTCC |
| FOXA2 | hTFtarget | 885 | 909 | - | 7.57895 | 9.38E-05 | 0.0398 | TGCTGGGTGCAGGTGGCAAAGGAGG |
| MAZ | hTFtarget | 1906 | 1917 | - | 8.84848 | 9.48E-05 | 0.0494 | CTCCTCCCACAT |
| ZNF263 | database | 334 | 354 | - | 8.93878 | 9.53E-05 | 0.0359 | CAGGGAGGAGGAACAGTGTGA |
| SIN3A | hTFtarget | 880 | 895 | - | 10 | 9.53E-05 | 0.0418 | GGCAAAGGAGGTGAAA |
| FOXA2 | hTFtarget | 892 | 916 | - | 7.53947 | 9.54E-05 | 0.0398 | GGCTACGTGCTGGGTGCAGGTGGCA |
| GTF3C2 | hTFtarget | 127 | 148 | + | 9.08434 | 9.55E-05 | 0.0354 | TCCCCCACCCACCATGATGTCC |
| FOXA2 | hTFtarget | 365 | 389 | - | 7.48684 | 9.75E-05 | 0.0398 | TAGGAGCTGGAAGGGGAAGGACCGG |

**Table S5**. The TF predicted by JASPAR2020.

| Matrix ID | Name | Score | Relative score | Start | End | Strand | Predicted sequence |
| --- | --- | --- | --- | --- | --- | --- | --- |
| MA0634.1 | ALX3 | 6.75847 | 0.851172 | 439 | 448 | + | cctgattact |
| MA0634.1 | ALX3 | 6.63377 | 0.847864 | 530 | 539 | - | cccaataaat |
| MA0634.1 | ALX3 | 6.30677 | 0.839188 | 695 | 704 | + | aaaaattagc |
| MA0007.2 | AR | 14.1058 | 0.932085 | 332 | 346 | - | aggaacagtgtgagt |
| MA0007.2 | AR | 12.1621 | 0.905939 | 117 | 131 | - | ggggacaggctgaac |
| MA0007.2 | AR | 10.2808 | 0.880631 | 85 | 99 | - | gagtacaagttgtaa |
| MA0007.2 | AR | 8.22821 | 0.85302 | 1396 | 1410 | + | aagcactgccagctc |
| MA0007.2 | AR | 7.28653 | 0.840353 | 1037 | 1051 | + | aagaacagaaggcag |
| MA1463.1 | ARGFX | 6.45132 | 0.844785 | 695 | 704 | - | gctaattttt |
| MA0259.1 | ARNT::HIF1A | 10.3207 | 0.973796 | 907 | 914 | - | ctacgtgc |
| MA0259.1 | ARNT::HIF1A | 7.65423 | 0.89425 | 661 | 668 | + | caacgtgg |
| MA1100.1 | ASCL1 | 10.5214 | 0.878395 | 892 | 904 | - | ggtgcaggtggca |
| MA1100.2 | ASCL1 | 9.16091 | 0.90597 | 893 | 902 | - | tgcaggtggc |
| MA1100.1 | ASCL1 | 8.77841 | 0.849116 | 378 | 390 | - | gtaggagctggaa |
| MA1100.2 | ASCL1 | 8.7114 | 0.896864 | 893 | 902 | + | gccacctgca |
| MA1100.1 | ASCL1 | 8.55729 | 0.845402 | 718 | 730 | - | cgagtagctggga |
| MA1100.2 | ASCL1 | 8.33629 | 0.889266 | 1421 | 1430 | + | ctcaggtgcc |
| MA1100.2 | ASCL1 | 8.18433 | 0.886188 | 584 | 593 | + | cacacctgta |
| MA1100.2 | ASCL1 | 7.95081 | 0.881457 | 584 | 593 | - | tacaggtgtg |
| MA1100.1 | ASCL1 | 7.54671 | 0.828426 | 1402 | 1414 | - | gtgggagctggca |
| MA1100.2 | ASCL1 | 7.32543 | 0.868789 | 1421 | 1430 | - | ggcacctgag |
| MA1100.1 | ASCL1 | 7.28665 | 0.824057 | 1911 | 1923 | + | ggaggaggtgggg |
| MA1100.1 | ASCL1 | 6.21642 | 0.806079 | 1682 | 1694 | + | tctgcagcttgcc |
| MA1631.1 | ASCL1(var.2) | 12.5077 | 0.922622 | 892 | 904 | + | tgccacctgcacc |
| MA1631.1 | ASCL1(var.2) | 7.99321 | 0.839362 | 1911 | 1923 | - | ccccacctcctcc |
| MA1631.1 | ASCL1(var.2) | 7.93266 | 0.838246 | 1045 | 1057 | - | ggccccctgcctt |
| MA1631.1 | ASCL1(var.2) | 7.50174 | 0.830298 | 583 | 595 | + | tcacacctgtaat |
| MA1631.1 | ASCL1(var.2) | 6.55764 | 0.812887 | 1419 | 1431 | - | tggcacctgaggt |
| MA1632.1 | ATF2 | 9.16106 | 0.862151 | 1415 | 1427 | - | acctgaggtcaag |
| MA1632.1 | ATF2 | 9.06714 | 0.860725 | 629 | 641 | + | acttgaggtcagg |
| MA1632.1 | ATF2 | 6.11606 | 0.815897 | 442 | 454 | - | aactgaagtaatc |
| MA0833.2 | ATF4 | 8.92151 | 0.850353 | 441 | 454 | - | aactgaagtaatca |
| MA0833.1 | ATF4 | 7.04469 | 0.819194 | 442 | 454 | - | aactgaagtaatc |
| MA0833.2 | ATF4 | 6.51477 | 0.817819 | 787 | 800 | - | cagtggcgcaatct |
| MA0833.1 | ATF4 | 6.17784 | 0.807067 | 788 | 800 | - | cagtggcgcaatc |
| MA1468.1 | ATOH7 | 11.1744 | 0.93666 | 1382 | 1391 | - | cccatatggc |
| MA1468.1 | ATOH7 | 9.85743 | 0.912439 | 963 | 972 | + | tccatatgcc |
| MA1468.1 | ATOH7 | 9.0404 | 0.897414 | 914 | 923 | - | agcatagggc |
| MA1468.1 | ATOH7 | 7.17796 | 0.863163 | 963 | 972 | - | ggcatatgga |
| MA1468.1 | ATOH7 | 6.52493 | 0.851153 | 1751 | 1760 | + | agcacaggtc |
| MA1468.1 | ATOH7 | 6.38952 | 0.848663 | 1538 | 1547 | + | aactcctggc |
| MA1468.1 | ATOH7 | 6.21085 | 0.845377 | 1382 | 1391 | + | gccatatggg |
| MA1468.1 | ATOH7 | 6.08676 | 0.843095 | 1040 | 1049 | - | gccttctgtt |
| MA1633.1 | BACH1 | 9.87262 | 0.840634 | 733 | 745 | - | tctgcctcagcct |
| MA1101.1 | BACH2 | 8.53702 | 0.806095 | 732 | 745 | - | tctgcctcagcctc |
| MA0877.2 | BARHL1 | 8.00536 | 0.932381 | 209 | 216 | + | ttaaatgt |
| MA0877.2 | BARHL1 | 7.71668 | 0.925838 | 1782 | 1789 | + | ctaaacat |
| MA0877.2 | BARHL1 | 7.54621 | 0.921974 | 1189 | 1196 | - | gtaaacag |
| MA0877.2 | BARHL1 | 7.34456 | 0.917404 | 1197 | 1204 | + | cttaatga |
| MA0877.2 | BARHL1 | 7.28424 | 0.916037 | 1171 | 1178 | + | gttaatgg |
| MA0877.2 | BARHL1 | 7.25675 | 0.915414 | 47 | 54 | - | cttaatgc |
| MA0877.2 | BARHL1 | 6.9 | 0.907329 | 1927 | 1934 | + | gttaatgt |
| MA0877.2 | BARHL1 | 6.39293 | 0.895836 | 440 | 447 | - | gtaatcag |
| MA0877.2 | BARHL1 | 6.3622 | 0.89514 | 1475 | 1482 | - | ataaacac |
| MA0877.2 | BARHL1 | 6.30144 | 0.893763 | 1347 | 1354 | - | cttattgt |
| MA0877.2 | BARHL1 | 6.23402 | 0.892235 | 1891 | 1898 | - | ttaaacaa |
| MA0635.1 | BARHL2 | 8.54926 | 0.92574 | 1893 | 1902 | + | gtttaatgat |
| MA0635.1 | BARHL2 | 8.35152 | 0.922059 | 1196 | 1205 | + | ccttaatgat |
| MA0635.1 | BARHL2 | 8.09411 | 0.917267 | 208 | 217 | + | tttaaatgtc |
| MA0635.1 | BARHL2 | 7.88713 | 0.913414 | 527 | 536 | - | aataaattgt |
| MA0635.1 | BARHL2 | 7.52665 | 0.906704 | 1170 | 1179 | + | agttaatggt |
| MA0635.1 | BARHL2 | 7.06488 | 0.898108 | 449 | 458 | - | aataaactga |
| MA0635.1 | BARHL2 | 6.77874 | 0.892781 | 1188 | 1197 | - | ggtaaacaga |
| MA0635.1 | BARHL2 | 6.77278 | 0.89267 | 1926 | 1935 | + | ggttaatgtt |
| MA0635.1 | BARHL2 | 6.25755 | 0.883079 | 1890 | 1899 | - | attaaacaag |
| MA0635.1 | BARHL2 | 6.14984 | 0.881074 | 1474 | 1483 | - | aataaacaca |
| MA0635.1 | BARHL2 | 6.13483 | 0.880795 | 1478 | 1487 | - | aataaataaa |
| MA0635.1 | BARHL2 | 6.03508 | 0.878938 | 46 | 55 | - | acttaatgca |
| MA0875.1 | BARX1 | 9.81548 | 0.970625 | 1172 | 1179 | - | accattaa |
| MA0875.1 | BARX1 | 8.2826 | 0.936662 | 81 | 88 | + | tccattac |
| MA0875.1 | BARX1 | 8.20362 | 0.934912 | 1198 | 1205 | - | atcattaa |
| MA0875.1 | BARX1 | 8.20362 | 0.934912 | 1895 | 1902 | - | atcattaa |
| MA0875.1 | BARX1 | 7.80942 | 0.926178 | 696 | 703 | + | aaaattag |
| MA0875.1 | BARX1 | 7.19058 | 0.912467 | 440 | 447 | + | ctgattac |
| MA0875.1 | BARX1 | 7.03086 | 0.908928 | 1470 | 1477 | - | cacattag |
| MA0875.1 | BARX1 | 6.73733 | 0.902425 | 1928 | 1935 | - | aacattaa |
| MA0875.1 | BARX1 | 6.67074 | 0.90095 | 1214 | 1221 | + | ttcattac |
| MA1471.1 | BARX2 | 11.262 | 0.93223 | 20 | 31 | + | caaaacaatttg |
| MA1471.1 | BARX2 | 9.20125 | 0.899835 | 1470 | 1481 | - | taaacacattag |
| MA1471.1 | BARX2 | 8.74013 | 0.892587 | 77 | 88 | + | tctatccattac |
| MA1471.1 | BARX2 | 8.38077 | 0.886938 | 1268 | 1279 | + | gaaagcaatttc |
| MA1471.1 | BARX2 | 7.15316 | 0.86764 | 42 | 53 | + | ttaatgcattaa |
| MA1471.1 | BARX2 | 7.15316 | 0.86764 | 42 | 53 | - | ttaatgcattaa |
| MA1471.1 | BARX2 | 6.78517 | 0.861856 | 1172 | 1183 | - | gtcaaccattaa |
| MA1471.1 | BARX2 | 6.73661 | 0.861092 | 1895 | 1906 | - | tacaatcattaa |
| MA1471.1 | BARX2 | 6.02211 | 0.849861 | 1898 | 1909 | - | acatacaatcat |
| MA1634.1 | BATF | 6.9234 | 0.823195 | 239 | 249 | + | actgactgaca |
| MA1634.1 | BATF | 6.4651 | 0.814006 | 827 | 837 | - | tgagactcagt |
| MA0462.1 | BATF::JUN | 9.11163 | 0.902929 | 237 | 247 | + | taactgactga |
| MA0462.1 | BATF::JUN | 7.61646 | 0.88392 | 825 | 835 | + | agactgagtct |
| MA0462.1 | BATF::JUN | 7.47087 | 0.882069 | 1211 | 1221 | - | gtaatgaatct |
| MA0462.2 | BATF::JUN | 6.85994 | 0.82191 | 239 | 249 | + | actgactgaca |
| MA0462.2 | BATF::JUN | 6.35314 | 0.811958 | 827 | 837 | - | tgagactcagt |
| MA0835.2 | BATF3 | 6.65261 | 0.817007 | 827 | 837 | - | tgagactcagt |
| MA0835.2 | BATF3 | 6.2061 | 0.808545 | 239 | 249 | + | actgactgaca |
| MA0835.2 | BATF3 | 6.10731 | 0.806673 | 735 | 745 | - | tctgcctcagc |
| MA0463.2 | BCL6 | 8.19734 | 0.80168 | 250 | 265 | - | gggctgtggaggaaac |
| MA1472.1 | BHLHA15(var.2) | 7.71389 | 0.876653 | 1109 | 1118 | - | ccctgctgtg |
| MA1472.1 | BHLHA15(var.2) | 7.37538 | 0.869742 | 1428 | 1437 | - | gcctgctggc |
| MA1472.1 | BHLHA15(var.2) | 7.23035 | 0.866781 | 1040 | 1049 | - | gccttctgtt |
| MA1472.1 | BHLHA15(var.2) | 7.00247 | 0.862129 | 1382 | 1391 | - | cccatatggc |
| MA1472.1 | BHLHA15(var.2) | 6.97169 | 0.8615 | 1382 | 1391 | + | gccatatggg |
| MA1472.1 | BHLHA15(var.2) | 6.73997 | 0.856769 | 584 | 593 | - | tacaggtgtg |
| MA1472.1 | BHLHA15(var.2) | 6.62401 | 0.854402 | 963 | 972 | + | tccatatgcc |
| MA1472.1 | BHLHA15(var.2) | 6.31428 | 0.848079 | 963 | 972 | - | ggcatatgga |
| MA1472.1 | BHLHA15(var.2) | 6.22601 | 0.846277 | 556 | 565 | - | aacttctgga |
| MA1472.1 | BHLHA15(var.2) | 6.18248 | 0.845388 | 1428 | 1437 | + | gccagcaggc |
| MA1472.1 | BHLHA15(var.2) | 6.15665 | 0.844861 | 719 | 728 | - | agtagctggg |
| MA1472.1 | BHLHA15(var.2) | 6.03872 | 0.842453 | 1109 | 1118 | + | cacagcaggg |
| MA0818.1 | BHLHE22 | 10.1992 | 0.902152 | 963 | 972 | + | tccatatgcc |
| MA0818.1 | BHLHE22 | 9.81874 | 0.895199 | 1382 | 1391 | - | cccatatggc |
| MA0818.1 | BHLHE22 | 9.02751 | 0.880741 | 1382 | 1391 | + | gccatatggg |
| MA0818.1 | BHLHE22 | 8.50212 | 0.871141 | 963 | 972 | - | ggcatatgga |
| MA0818.1 | BHLHE22 | 8.48594 | 0.870845 | 914 | 923 | + | gccctatgct |
| MA0818.1 | BHLHE22 | 6.25097 | 0.830006 | 914 | 923 | - | agcatagggc |
| MA0817.1 | BHLHE23 | 9.06906 | 0.878055 | 1381 | 1392 | - | acccatatggca |
| MA0817.1 | BHLHE23 | 8.26192 | 0.867382 | 962 | 973 | - | gggcatatggat |
| MA0817.1 | BHLHE23 | 7.55958 | 0.858095 | 1381 | 1392 | + | tgccatatgggt |
| MA0817.1 | BHLHE23 | 7.55283 | 0.858005 | 962 | 973 | + | atccatatgccc |
| MA0464.2 | BHLHE40 | 6.07348 | 0.848797 | 1421 | 1430 | + | ctcaggtgcc |
| MA0636.1 | BHLHE41 | 6.18914 | 0.845114 | 626 | 635 | + | atcacttgag |
| MA0876.1 | BSX | 9.08359 | 0.958764 | 440 | 447 | + | ctgattac |
| MA0876.1 | BSX | 8.83564 | 0.953302 | 1172 | 1179 | - | accattaa |
| MA0876.1 | BSX | 8.30186 | 0.941543 | 81 | 88 | + | tccattac |
| MA0876.1 | BSX | 8.0576 | 0.936162 | 1198 | 1205 | - | atcattaa |
| MA0876.1 | BSX | 8.0576 | 0.936162 | 1895 | 1902 | - | atcattaa |
| MA0876.1 | BSX | 7.52382 | 0.924404 | 1214 | 1221 | + | ttcattac |
| MA0876.1 | BSX | 7.087 | 0.914781 | 1470 | 1477 | - | cacattag |
| MA0876.1 | BSX | 6.35828 | 0.898728 | 696 | 703 | + | aaaattag |
| MA0876.1 | BSX | 6.30042 | 0.897453 | 1924 | 1931 | + | ctggttaa |
| MA0876.1 | BSX | 6.21424 | 0.895555 | 236 | 243 | - | tcagttaa |
| MA0876.1 | BSX | 6.21424 | 0.895555 | 1168 | 1175 | + | tcagttaa |
| MA0878.1 | CDX1 | 10.229 | 0.935924 | 530 | 538 | - | ccaataaat |
| MA0878.1 | CDX1 | 8.88844 | 0.908641 | 1894 | 1902 | - | atcattaaa |
| MA0878.1 | CDX1 | 7.80327 | 0.886556 | 1171 | 1179 | - | accattaac |
| MA0878.1 | CDX1 | 7.02188 | 0.870653 | 1197 | 1205 | - | atcattaag |
| MA0878.1 | CDX1 | 6.50972 | 0.86023 | 14 | 22 | + | gtaatacaa |
| MA0465.2 | CDX2 | 9.96119 | 0.865883 | 529 | 540 | - | acccaataaatt |
| MA0465.2 | CDX2 | 8.48139 | 0.836732 | 39 | 50 | - | atgcattaaagg |
| MA0465.1 | CDX2 | 7.93252 | 0.872159 | 12 | 22 | + | aagtaatacaa |
| MA0465.2 | CDX2 | 7.79153 | 0.823141 | 1476 | 1487 | - | aataaataaaca |
| MA0465.2 | CDX2 | 7.61793 | 0.819721 | 12 | 23 | + | aagtaatacaaa |
| MA0465.2 | CDX2 | 7.48007 | 0.817006 | 1480 | 1491 | - | tataaataaata |
| MA0465.1 | CDX2 | 6.88782 | 0.85645 | 1285 | 1295 | - | gaaccctaaaa |
| MA0465.2 | CDX2 | 6.75281 | 0.802679 | 1212 | 1223 | - | cagtaatgaatc |
| MA0465.1 | CDX2 | 6.54585 | 0.851308 | 40 | 50 | - | atgcattaaag |
| MA1473.1 | CDX4 | 7.33411 | 0.869986 | 529 | 539 | - | cccaataaatt |
| MA0102.4 | CEBPA | 11.0948 | 0.871076 | 517 | 530 | + | atttttcacaacaa |
| MA0102.3 | CEBPA | 10.3211 | 0.921637 | 789 | 799 | + | attgcgccact |
| MA0102.4 | CEBPA | 8.82025 | 0.833362 | 787 | 800 | + | agattgcgccactg |
| MA0102.3 | CEBPA | 8.50311 | 0.899857 | 664 | 674 | - | gtttcaccacg |
| MA0102.3 | CEBPA | 6.99734 | 0.881818 | 1080 | 1090 | + | gtttctccact |
| MA0102.4 | CEBPA | 6.85423 | 0.800763 | 663 | 676 | - | gggtttcaccacgt |
| MA0102.3 | CEBPA | 6.25077 | 0.872874 | 519 | 529 | + | ttttcacaaca |
| MA0466.1 | CEBPB | 12.56 | 0.951595 | 788 | 798 | + | gattgcgccac |
| MA0466.2 | CEBPB | 11.8432 | 0.945203 | 789 | 798 | - | gtggcgcaat |
| MA0466.1 | CEBPB | 11.4691 | 0.940161 | 665 | 675 | - | ggtttcaccac |
| MA0466.2 | CEBPB | 10.6247 | 0.928704 | 789 | 798 | + | attgcgccac |
| MA0466.1 | CEBPB | 8.82076 | 0.9124 | 1079 | 1089 | + | tgtttctccac |
| MA0466.2 | CEBPB | 7.07982 | 0.880708 | 519 | 528 | + | ttttcacaac |
| MA0836.1 | CEBPD | 12.0901 | 0.942224 | 789 | 798 | - | gtggcgcaat |
| MA0836.2 | CEBPD | 11.5588 | 0.893649 | 518 | 530 | + | tttttcacaacaa |
| MA0836.1 | CEBPD | 10.3232 | 0.917499 | 789 | 798 | + | attgcgccac |
| MA0836.2 | CEBPD | 8.02571 | 0.829903 | 788 | 800 | + | gattgcgccactg |
| MA0836.2 | CEBPD | 6.83823 | 0.808478 | 787 | 799 | - | agtggcgcaatct |
| MA0836.2 | CEBPD | 6.67021 | 0.805446 | 663 | 675 | - | ggtttcaccacgt |
| MA0836.1 | CEBPD | 6.42905 | 0.863007 | 519 | 528 | + | ttttcacaac |
| MA0837.1 | CEBPE | 11.8571 | 0.942471 | 789 | 798 | - | gtggcgcaat |
| MA0837.1 | CEBPE | 11.0053 | 0.928662 | 789 | 798 | + | attgcgccac |
| MA0837.1 | CEBPE | 7.70378 | 0.875145 | 519 | 528 | + | ttttcacaac |
| MA0837.1 | CEBPE | 6.26871 | 0.851883 | 665 | 674 | + | gtggtgaaac |
| MA0838.1 | CEBPG | 11.4623 | 0.924976 | 789 | 798 | - | gtggcgcaat |
| MA0838.1 | CEBPG | 7.63993 | 0.875033 | 789 | 798 | + | attgcgccac |
| MA1636.1 | CEBPG(var.2) | 10.4668 | 0.858366 | 786 | 800 | - | cagtggcgcaatctt |
| MA1636.1 | CEBPG(var.2) | 9.08665 | 0.838155 | 440 | 454 | - | aactgaagtaatcag |
| MA1636.1 | CEBPG(var.2) | 6.66764 | 0.802733 | 663 | 677 | + | acgtggtgaaacccc |
| MA0637.1 | CENPB | 11.1835 | 0.884167 | 1561 | 1575 | + | cccgccttggccaaa |
| MA0637.1 | CENPB | 6.33255 | 0.823084 | 55 | 69 | - | accgtttcccgtgta |
| MA0819.1 | CLOCK | 6.79037 | 0.828836 | 1353 | 1362 | + | agcaagtggc |
| MA0018.2 | CREB1 | 9.77186 | 0.934202 | 632 | 639 | + | tgaggtca |
| MA0018.2 | CREB1 | 9.77186 | 0.934202 | 1417 | 1424 | - | tgaggtca |
| MA0018.4 | CREB1 | 9.24683 | 0.852365 | 629 | 641 | + | acttgaggtcagg |
| MA0018.4 | CREB1 | 9.08337 | 0.849054 | 1415 | 1427 | - | acctgaggtcaag |
| MA0018.3 | CREB1 | 9.02986 | 0.848766 | 630 | 641 | + | cttgaggtcagg |
| MA0018.3 | CREB1 | 9.02986 | 0.848766 | 630 | 641 | - | cctgacctcaag |
| MA0018.3 | CREB1 | 9.02986 | 0.848766 | 1415 | 1426 | + | cttgacctcagg |
| MA0018.3 | CREB1 | 9.02986 | 0.848766 | 1415 | 1426 | - | cctgaggtcaag |
| MA0018.2 | CREB1 | 7.86143 | 0.864239 | 632 | 639 | - | tgacctca |
| MA0018.2 | CREB1 | 7.86143 | 0.864239 | 1417 | 1424 | + | tgacctca |
| MA0018.4 | CREB1 | 6.97716 | 0.80639 | 138 | 150 | + | ccatgatgtccag |
| MA0018.2 | CREB1 | 6.79596 | 0.82522 | 1544 | 1551 | - | tgaagcca |
| MA0018.2 | CREB1 | 6.65618 | 0.820101 | 1833 | 1840 | + | tgactcca |
| MA0018.2 | CREB1 | 6.577 | 0.817201 | 141 | 148 | - | ggacatca |
| MA0018.2 | CREB1 | 6.53272 | 0.81558 | 444 | 451 | - | tgaagtaa |
| MA0018.2 | CREB1 | 6.5141 | 0.814898 | 1129 | 1136 | - | tgacggct |
| MA1474.1 | CREB3L4 | 7.2716 | 0.811014 | 659 | 670 | - | caccacgttggc |
| MA1102.2 | CTCFL | 13.5965 | 0.930561 | 1047 | 1058 | + | ggcagggggcca |
| MA1102.1 | CTCFL | 10.2681 | 0.838005 | 1046 | 1059 | + | aggcagggggccag |
| MA1102.2 | CTCFL | 10.1 | 0.869605 | 1367 | 1378 | - | accagggtgccc |
| MA1102.2 | CTCFL | 9.71848 | 0.862953 | 891 | 902 | - | tgcaggtggcaa |
| MA1102.1 | CTCFL | 8.09394 | 0.80342 | 890 | 903 | - | gtgcaggtggcaaa |
| MA0754.1 | CUX1 | 8.20955 | 0.878314 | 1882 | 1891 | + | ggatcaatct |
| MA0754.1 | CUX1 | 7.11646 | 0.858656 | 952 | 961 | - | acatcaatcc |
| MA0755.1 | CUX2 | 7.55894 | 0.853813 | 1882 | 1891 | + | ggatcaatct |
| MA0755.1 | CUX2 | 6.05315 | 0.82741 | 952 | 961 | - | acatcaatcc |
| MA0882.1 | DLX6 | 7.02652 | 0.895362 | 1172 | 1179 | - | accattaa |
| MA0882.1 | DLX6 | 6.94929 | 0.893359 | 1272 | 1279 | + | gcaatttc |
| MA0882.1 | DLX6 | 6.81041 | 0.889758 | 1198 | 1205 | - | atcattaa |
| MA0882.1 | DLX6 | 6.81041 | 0.889758 | 1895 | 1902 | - | atcattaa |
| MA0882.1 | DLX6 | 6.7777 | 0.88891 | 696 | 703 | - | ctaatttt |
| MA0882.1 | DLX6 | 6.76922 | 0.88869 | 440 | 447 | + | ctgattac |
| MA0882.1 | DLX6 | 6.72726 | 0.887602 | 81 | 88 | + | tccattac |
| MA0882.1 | DLX6 | 6.55361 | 0.883099 | 527 | 534 | + | acaattta |
| MA0882.1 | DLX6 | 6.51115 | 0.881998 | 1214 | 1221 | + | ttcattac |
| MA0882.1 | DLX6 | 6.42708 | 0.879818 | 696 | 703 | + | aaaattag |
| MA0882.1 | DLX6 | 6.12867 | 0.872081 | 1201 | 1208 | - | gcaatcat |
| MA0610.1 | DMRT3 | 12.3878 | 0.933405 | 957 | 967 | + | gatgtatccat |
| MA0610.1 | DMRT3 | 11.9736 | 0.924746 | 1226 | 1236 | - | agtgtatcatg |
| MA0610.1 | DMRT3 | 6.61764 | 0.812763 | 848 | 858 | - | gatttatcaac |
| MA1478.1 | DMRTA2 | 10.494 | 0.894928 | 957 | 968 | - | tatggatacatc |
| MA1478.1 | DMRTA2 | 9.95484 | 0.884038 | 1225 | 1236 | + | acatgatacact |
| MA1479.1 | DMRTC2 | 12.6228 | 0.900847 | 957 | 968 | - | tatggatacatc |
| MA1479.1 | DMRTC2 | 10.5804 | 0.865667 | 1225 | 1236 | + | acatgatacact |
| MA1479.1 | DMRTC2 | 7.51181 | 0.81281 | 847 | 858 | + | agttgataaatc |
| MA1480.1 | DPRX | 7.41587 | 0.849112 | 696 | 705 | - | agctaatttt |
| MA1480.1 | DPRX | 6.83286 | 0.83768 | 1302 | 1311 | - | ttctaatcct |
| MA1480.1 | DPRX | 6.35854 | 0.828378 | 1158 | 1167 | + | gactgatccc |
| MA1481.1 | DRGX | 8.85328 | 0.943132 | 440 | 447 | + | ctgattac |
| MA1481.1 | DRGX | 6.60671 | 0.898278 | 1214 | 1221 | + | ttcattac |
| MA1481.1 | DRGX | 6.04449 | 0.887053 | 81 | 88 | + | tccattac |
| MA0468.1 | DUX4 | 9.36142 | 0.907602 | 441 | 451 | - | tgaagtaatca |
| MA0468.1 | DUX4 | 8.31073 | 0.896164 | 671 | 681 | + | aaaccccatct |
| MA0884.1 | DUXA | 13.2406 | 0.923985 | 440 | 452 | - | ctgaagtaatcag |
| MA0884.1 | DUXA | 6.92759 | 0.815052 | 1189 | 1201 | - | ttaaggtaaacag |
| MA0884.1 | DUXA | 6.27262 | 0.80375 | 454 | 466 | + | ttattctcatcat |
| MA0024.2 | E2F1 | 13.6436 | 0.973286 | 1558 | 1568 | - | aaggcgggagg |
| MA0024.3 | E2F1 | 8.65661 | 0.833768 | 704 | 715 | + | ctaggcgcctgt |
| MA0024.3 | E2F1 | 8.2168 | 0.826446 | 704 | 715 | - | acaggcgcctag |
| MA0024.2 | E2F1 | 7.64564 | 0.883048 | 1388 | 1398 | + | tgggtgggaag |
| MA0024.1 | E2F1 | 7.17655 | 0.813289 | 890 | 897 | + | tttgccac |
| MA0024.1 | E2F1 | 6.81352 | 0.800797 | 58 | 65 | - | tttcccgt |
| MA0024.2 | E2F1 | 6.68526 | 0.8686 | 1358 | 1368 | + | gtggccggagg |
| MA0024.2 | E2F1 | 6.60207 | 0.867348 | 615 | 625 | + | gaggcgggcag |
| MA0024.2 | E2F1 | 6.29882 | 0.862786 | 100 | 110 | + | tcagcgggaag |
| MA0024.2 | E2F1 | 6.00106 | 0.858306 | 377 | 387 | - | ggagctggaag |
| MA0864.2 | E2F2 | 8.13447 | 0.822202 | 786 | 801 | - | gcagtggcgcaatctt |
| MA0470.1 | E2F4 | 13.2342 | 0.954388 | 1557 | 1567 | - | aggcgggagga |
| MA0470.1 | E2F4 | 11.7709 | 0.931215 | 101 | 111 | + | cagcgggaaga |
| MA0470.1 | E2F4 | 8.03436 | 0.872043 | 1389 | 1399 | + | gggtgggaagc |
| MA0470.1 | E2F4 | 6.83793 | 0.853096 | 616 | 626 | + | aggcgggcaga |
| MA0470.1 | E2F4 | 6.57101 | 0.848869 | 1359 | 1369 | + | tggccggaggg |
| MA0471.1 | E2F6 | 14.5333 | 0.975443 | 1557 | 1567 | - | aggcgggagga |
| MA0471.2 | E2F6 | 12.9489 | 0.920936 | 1557 | 1569 | - | caaggcgggagga |
| MA0471.1 | E2F6 | 12.0684 | 0.939076 | 1389 | 1399 | + | gggtgggaagc |
| MA0471.2 | E2F6 | 11.4111 | 0.892576 | 1387 | 1399 | + | atgggtgggaagc |
| MA0471.2 | E2F6 | 10.5899 | 0.87743 | 614 | 626 | + | tgaggcgggcaga |
| MA0471.2 | E2F6 | 10.0668 | 0.867783 | 99 | 111 | + | ctcagcgggaaga |
| MA0471.1 | E2F6 | 9.95588 | 0.907909 | 101 | 111 | + | cagcgggaaga |
| MA0471.2 | E2F6 | 8.68795 | 0.842355 | 1988 | 2000 | - | aggggagggacaa |
| MA0471.1 | E2F6 | 8.43575 | 0.885481 | 1406 | 1416 | - | aggtgggagct |
| MA0471.2 | E2F6 | 8.14592 | 0.83236 | 1406 | 1418 | - | caaggtgggagct |
| MA0471.1 | E2F6 | 7.88454 | 0.877349 | 1450 | 1460 | - | gggaggaaaaa |
| MA0471.2 | E2F6 | 7.68027 | 0.823772 | 1357 | 1369 | + | agtggccggaggg |
| MA0471.2 | E2F6 | 7.55177 | 0.821402 | 376 | 388 | - | aggagctggaagg |
| MA0471.1 | E2F6 | 7.4603 | 0.871089 | 616 | 626 | + | aggcgggcaga |
| MA0471.1 | E2F6 | 7.22847 | 0.867669 | 1988 | 1998 | - | gggagggacaa |
| MA0471.2 | E2F6 | 7.05494 | 0.81224 | 889 | 901 | - | gcaggtggcaaag |
| MA0471.1 | E2F6 | 6.99836 | 0.864274 | 276 | 286 | - | aggaggcagga |
| MA0471.2 | E2F6 | 6.98692 | 0.810985 | 1628 | 1640 | + | agaggctgggagc |
| MA0471.2 | E2F6 | 6.87592 | 0.808938 | 1361 | 1373 | + | gccggagggcacc |
| MA0471.2 | E2F6 | 6.75557 | 0.806719 | 273 | 285 | - | ggaggcaggactg |
| MA0471.1 | E2F6 | 6.40178 | 0.855472 | 376 | 386 | - | gagctggaagg |
| MA0471.1 | E2F6 | 6.24412 | 0.853146 | 1359 | 1369 | + | tggccggaggg |
| MA0154.4 | EBF1 | 9.82856 | 0.830495 | 1813 | 1827 | - | ttgtcccagaggaag |
| MA0154.3 | EBF1 | 8.10173 | 0.82415 | 1813 | 1826 | + | cttcctctgggaca |
| MA0154.4 | EBF1 | 8.07863 | 0.801215 | 420 | 434 | - | gcttcctagaggaag |
| MA0154.4 | EBF1 | 8.0063 | 0.800005 | 1942 | 1956 | - | cagcccaagaggaac |
| MA0154.2 | EBF1 | 8.00161 | 0.898778 | 1945 | 1955 | - | agcccaagagg |
| MA0154.2 | EBF1 | 7.61199 | 0.894347 | 1814 | 1824 | + | ttcctctggga |
| MA0154.2 | EBF1 | 7.42892 | 0.892265 | 1944 | 1954 | + | tcctcttgggc |
| MA1637.1 | EBF3 | 9.59519 | 0.843807 | 1813 | 1825 | - | gtcccagaggaag |
| MA1637.1 | EBF3 | 7.42808 | 0.802277 | 1943 | 1955 | - | agcccaagaggaa |
| MA0162.2 | EGR1 | 14.6703 | 0.937287 | 1911 | 1924 | - | gccccacctcctcc |
| MA0162.2 | EGR1 | 11.1616 | 0.899711 | 1905 | 1918 | - | cctcctcccacata |
| MA0162.2 | EGR1 | 9.57446 | 0.882714 | 763 | 776 | - | caacctccgcctcc |
| MA0162.2 | EGR1 | 8.24637 | 0.868492 | 766 | 779 | - | ctgcaacctccgcc |
| MA0162.4 | EGR1 | 8.15049 | 0.802276 | 1904 | 1917 | - | ctcctcccacatac |
| MA0162.2 | EGR1 | 6.88674 | 0.853931 | 548 | 561 | + | ccctctcctccaga |
| MA0162.2 | EGR1 | 6.16246 | 0.846175 | 1325 | 1338 | + | tccccagccactca |
| MA0162.2 | EGR1 | 6.00245 | 0.844461 | 368 | 381 | + | gtccttccccttcc |
| MA0733.1 | EGR4 | 9.49952 | 0.81645 | 1385 | 1400 | - | tgcttcccacccatat |
| MA0598.3 | EHF | 13.8061 | 0.906568 | 416 | 430 | + | ctcacttcctctagg |
| MA0598.1 | EHF | 13.7593 | 0.998789 | 419 | 426 | + | acttcctc |
| MA0598.3 | EHF | 9.49797 | 0.828183 | 1822 | 1836 | - | gtcactgccttgtcc |
| MA0598.3 | EHF | 8.83487 | 0.816118 | 1809 | 1823 | + | ctctcttcctctggg |
| MA0598.3 | EHF | 8.59748 | 0.811799 | 1333 | 1347 | - | tccacatcctgagtg |
| MA0598.3 | EHF | 8.5021 | 0.810064 | 1348 | 1362 | - | gccacttgcttattg |
| MA0598.3 | EHF | 7.95842 | 0.800171 | 838 | 852 | - | tcaacttcttttttt |
| MA0598.1 | EHF | 7.5221 | 0.887497 | 1812 | 1819 | + | tcttcctc |
| MA0598.1 | EHF | 6.5783 | 0.870657 | 284 | 291 | + | ccttactg |
| MA0598.1 | EHF | 6.5783 | 0.870657 | 347 | 354 | + | cctccctg |
| MA0598.1 | EHF | 6.5783 | 0.870657 | 376 | 383 | + | ccttccag |
| MA0598.1 | EHF | 6.5783 | 0.870657 | 386 | 393 | + | cctacctg |
| MA0598.1 | EHF | 6.5783 | 0.870657 | 1654 | 1661 | - | ccatcctg |
| MA0598.1 | EHF | 6.55236 | 0.870194 | 277 | 284 | + | cctgcctc |
| MA0598.1 | EHF | 6.55236 | 0.870194 | 305 | 312 | + | ccttgctc |
| MA0598.1 | EHF | 6.55236 | 0.870194 | 370 | 377 | + | ccttcccc |
| MA0598.1 | EHF | 6.53639 | 0.869909 | 1337 | 1344 | - | acatcctg |
| MA0598.1 | EHF | 6.51045 | 0.869446 | 1912 | 1919 | - | acctcctc |
| MA0473.3 | ELF1 | 13.4409 | 0.903591 | 416 | 429 | - | ctagaggaagtgag |
| MA0473.1 | ELF1 | 11.3469 | 0.901539 | 418 | 430 | - | cctagaggaagtg |
| MA0473.3 | ELF1 | 10.7906 | 0.856252 | 1334 | 1347 | + | actcaggatgtgga |
| MA0473.3 | ELF1 | 9.35755 | 0.830655 | 1809 | 1822 | - | ccagaggaagagag |
| MA0473.1 | ELF1 | 8.02094 | 0.858604 | 1811 | 1823 | - | cccagaggaagag |
| MA0473.3 | ELF1 | 7.8265 | 0.803308 | 1823 | 1836 | + | gacaaggcagtgac |
| MA0640.2 | ELF3 | 13.8101 | 0.920877 | 415 | 428 | + | cctcacttcctcta |
| MA0640.2 | ELF3 | 9.85091 | 0.84632 | 1910 | 1923 | - | ccccacctcctccc |
| MA0640.2 | ELF3 | 9.82987 | 0.845923 | 1335 | 1348 | - | gtccacatcctgag |
| MA0640.2 | ELF3 | 9.34457 | 0.836784 | 1808 | 1821 | + | cctctcttcctctg |
| MA0640.2 | ELF3 | 9.18596 | 0.833798 | 1824 | 1837 | - | agtcactgccttgt |
| MA0640.2 | ELF3 | 8.80475 | 0.826619 | 1350 | 1363 | - | ggccacttgcttat |
| MA0640.2 | ELF3 | 8.05251 | 0.812453 | 880 | 893 | + | tttcacctcctttg |
| MA0640.2 | ELF3 | 7.92079 | 0.809972 | 372 | 385 | + | ttccccttccagct |
| MA0641.1 | ELF4 | 6.87264 | 0.800433 | 757 | 768 | + | aacccgggaggc |
| MA0136.2 | ELF5 | 10.7984 | 0.915148 | 418 | 428 | - | tagaggaagtg |
| MA0136.2 | ELF5 | 8.79008 | 0.877712 | 102 | 112 | + | agcgggaagaa |
| MA0136.2 | ELF5 | 7.60481 | 0.855618 | 369 | 379 | - | aaggggaagga |
| MA0136.2 | ELF5 | 6.94982 | 0.843409 | 1652 | 1662 | + | accaggatggc |
| MA0136.2 | ELF5 | 6.87229 | 0.841964 | 1940 | 1950 | - | aagaggaacca |
| MA0136.2 | ELF5 | 6.86629 | 0.841852 | 1811 | 1821 | - | cagaggaagag |
| MA0136.2 | ELF5 | 6.82178 | 0.841023 | 249 | 259 | - | tggaggaaact |
| MA0136.2 | ELF5 | 6.59088 | 0.836718 | 445 | 455 | - | aaactgaagta |
| MA0136.2 | ELF5 | 6.46765 | 0.834421 | 1070 | 1080 | - | caagggaagtt |
| MA0136.2 | ELF5 | 6.30586 | 0.831406 | 1335 | 1345 | + | ctcaggatgtg |
| MA0136.2 | ELF5 | 6.29915 | 0.831281 | 983 | 993 | + | taagggaagct |
| MA0136.2 | ELF5 | 6.24855 | 0.830337 | 1824 | 1834 | + | acaaggcagtg |
| MA0028.1 | ELK1 | 8.22186 | 0.88547 | 377 | 386 | - | gagctggaag |
| MA0028.1 | ELK1 | 7.77777 | 0.870712 | 101 | 110 | + | cagcgggaag |
| MA0028.1 | ELK1 | 7.56703 | 0.863709 | 1120 | 1129 | - | ttacctgaag |
| MA0028.1 | ELK1 | 7.31226 | 0.855242 | 1964 | 1973 | - | gagccagaaa |
| MA0028.1 | ELK1 | 6.91825 | 0.842149 | 56 | 65 | + | acacgggaaa |
| MA0028.1 | ELK1 | 6.52728 | 0.829157 | 757 | 766 | + | aacccgggag |
| MA0028.1 | ELK1 | 6.51134 | 0.828627 | 447 | 456 | - | taaactgaag |
| MA0028.1 | ELK1 | 6.30462 | 0.821757 | 144 | 153 | - | gagctggaca |
| MA0759.1 | ELK3 | 8.37546 | 0.858785 | 418 | 427 | - | agaggaagtg |
| MA0759.1 | ELK3 | 6.74623 | 0.82848 | 1336 | 1345 | + | tcaggatgtg |
| MA0076.2 | ELK4 | 10.8198 | 0.909003 | 417 | 427 | + | tcacttcctct |
| MA0076.2 | ELK4 | 7.63078 | 0.859566 | 1810 | 1820 | + | tctcttcctct |
| MA0076.1 | ELK4 | 7.62692 | 0.80698 | 58 | 66 | + | acgggaaac |
| MA0076.1 | ELK4 | 7.53319 | 0.804351 | 1119 | 1127 | - | acctgaaga |
| MA0076.2 | ELK4 | 6.93886 | 0.84884 | 1961 | 1971 | + | ccatttctggc |
| MA0076.2 | ELK4 | 6.66689 | 0.844624 | 248 | 258 | + | cagtttcctcc |
| MA0076.2 | ELK4 | 6.16784 | 0.836887 | 58 | 68 | - | ccgtttcccgt |
| MA0612.1 | EMX1 | 9.19579 | 0.921498 | 1197 | 1206 | + | cttaatgatt |
| MA0612.1 | EMX1 | 8.13947 | 0.891817 | 1894 | 1903 | + | tttaatgatt |
| MA0612.2 | EMX1 | 8.02927 | 0.915176 | 1214 | 1221 | + | ttcattac |
| MA0612.1 | EMX1 | 7.97212 | 0.887115 | 1213 | 1222 | - | agtaatgaat |
| MA0612.2 | EMX1 | 7.44344 | 0.904454 | 1214 | 1221 | - | gtaatgaa |
| MA0612.1 | EMX1 | 7.3699 | 0.870194 | 439 | 448 | + | cctgattact |
| MA0612.1 | EMX1 | 7.31844 | 0.868749 | 1171 | 1180 | + | gttaatggtt |
| MA0612.1 | EMX1 | 6.80799 | 0.854406 | 695 | 704 | + | aaaaattagc |
| MA0612.2 | EMX1 | 6.59025 | 0.88884 | 1198 | 1205 | - | atcattaa |
| MA0612.2 | EMX1 | 6.59025 | 0.88884 | 1895 | 1902 | - | atcattaa |
| MA0612.1 | EMX1 | 6.51484 | 0.846169 | 695 | 704 | - | gctaattttt |
| MA0612.2 | EMX1 | 6.35418 | 0.88452 | 81 | 88 | + | tccattac |
| MA0612.2 | EMX1 | 6.34369 | 0.884328 | 1198 | 1205 | + | ttaatgat |
| MA0612.2 | EMX1 | 6.34369 | 0.884328 | 1895 | 1902 | + | ttaatgat |
| MA0612.1 | EMX1 | 6.06206 | 0.833447 | 1213 | 1222 | + | attcattact |
| MA0886.1 | EMX2 | 8.12683 | 0.907696 | 1213 | 1222 | - | agtaatgaat |
| MA0886.1 | EMX2 | 7.87287 | 0.903402 | 1197 | 1206 | - | aatcattaag |
| MA0886.1 | EMX2 | 7.59378 | 0.898682 | 1213 | 1222 | + | attcattact |
| MA0886.1 | EMX2 | 7.10569 | 0.890428 | 1894 | 1903 | - | aatcattaaa |
| MA0886.1 | EMX2 | 7.0144 | 0.888884 | 695 | 704 | + | aaaaattagc |
| MA0886.1 | EMX2 | 6.30823 | 0.876942 | 1171 | 1180 | - | aaccattaac |
| MA0027.2 | EN1 | 8.73604 | 0.931407 | 440 | 447 | - | gtaatcag |
| MA0027.2 | EN1 | 6.72071 | 0.887616 | 696 | 703 | + | aaaattag |
| MA0027.2 | EN1 | 6.5427 | 0.883748 | 1201 | 1208 | - | gcaatcat |
| MA0027.2 | EN1 | 6.42993 | 0.881298 | 1214 | 1221 | - | gtaatgaa |
| MA0642.1 | EN2 | 8.27037 | 0.904608 | 439 | 448 | - | agtaatcagg |
| MA0642.1 | EN2 | 7.29862 | 0.883549 | 1171 | 1180 | - | aaccattaac |
| MA0642.1 | EN2 | 7.07452 | 0.878693 | 439 | 448 | + | cctgattact |
| MA0642.1 | EN2 | 6.65203 | 0.869537 | 1200 | 1209 | - | ggcaatcatt |
| MA0642.1 | EN2 | 6.53523 | 0.867006 | 80 | 89 | + | atccattaca |
| MA0642.1 | EN2 | 6.44592 | 0.86507 | 1213 | 1222 | + | attcattact |
| MA0642.1 | EN2 | 6.03092 | 0.856077 | 1197 | 1206 | - | aatcattaag |
| MA0642.1 | EN2 | 6.02044 | 0.85585 | 1331 | 1340 | + | gccactcagg |
| MA0800.1 | EOMES | 11.1512 | 0.880973 | 579 | 591 | - | caggtgtgagcta |
| MA0800.1 | EOMES | 6.98882 | 0.812896 | 518 | 530 | - | ttgttgtgaaaaa |
| MA0800.1 | EOMES | 6.7849 | 0.809561 | 1405 | 1417 | - | aaggtgggagctg |
| MA0800.1 | EOMES | 6.65747 | 0.807477 | 876 | 888 | - | gaggtgaaaacat |
| MA0760.1 | ERF | 9.29503 | 0.862374 | 418 | 427 | - | agaggaagtg |
| MA0760.1 | ERF | 8.38215 | 0.844418 | 58 | 67 | + | acgggaaacg |
| MA0760.1 | ERF | 6.74142 | 0.812144 | 1962 | 1971 | - | gccagaaatg |
| MA0474.2 | ERG | 9.29093 | 0.895569 | 418 | 427 | - | agaggaagtg |
| MA0474.2 | ERG | 8.61618 | 0.884335 | 1336 | 1345 | + | tcaggatgtg |
| MA0474.2 | ERG | 6.84656 | 0.854871 | 58 | 67 | + | acgggaaacg |
| MA0258.1 | ESR2 | 11.1451 | 0.837389 | 535 | 552 | + | ttgggtcttggtcccctc |
| MA0258.2 | ESR2 | 11.1448 | 0.876999 | 537 | 551 | - | aggggaccaagaccc |
| MA0258.1 | ESR2 | 11.103 | 0.836788 | 1365 | 1382 | - | cagtaccagggtgccctc |
| MA0258.2 | ESR2 | 10.7647 | 0.871978 | 1366 | 1380 | + | agggcaccctggtac |
| MA0258.1 | ESR2 | 10.2694 | 0.82487 | 770 | 787 | - | ttggctcactgcaacctc |
| MA0258.2 | ESR2 | 7.3595 | 0.826993 | 570 | 584 | + | agggcatgatagctc |
| MA0258.2 | ESR2 | 6.4149 | 0.814514 | 1658 | 1672 | + | atggcagcctgtaca |
| MA0258.2 | ESR2 | 6.36022 | 0.813792 | 116 | 130 | + | tgttcagcctgtccc |
| MA0258.2 | ESR2 | 6.16686 | 0.811237 | 1595 | 1609 | + | gagccaccatgcccg |
| MA0592.3 | ESRRA | 10.2349 | 0.85565 | 1252 | 1264 | - | cctcaaggccaag |
| MA0592.3 | ESRRA | 9.78987 | 0.847645 | 1142 | 1154 | - | tttcaaggtctgc |
| MA0592.1 | ESRRA | 8.97022 | 0.840346 | 1142 | 1152 | - | tcaaggtctgc |
| MA0592.1 | ESRRA | 7.85688 | 0.818856 | 1252 | 1262 | - | tcaaggccaag |
| MA0141.3 | ESRRB | 10.0223 | 0.870954 | 1252 | 1262 | - | tcaaggccaag |
| MA0141.3 | ESRRB | 6.36849 | 0.816851 | 1142 | 1152 | - | tcaaggtctgc |
| MA0644.1 | ESX1 | 7.91027 | 0.894927 | 695 | 704 | + | aaaaattagc |
| MA0644.1 | ESX1 | 7.36119 | 0.880811 | 530 | 539 | - | cccaataaat |
| MA0644.1 | ESX1 | 7.23012 | 0.877442 | 1171 | 1180 | - | aaccattaac |
| MA0644.1 | ESX1 | 7.11971 | 0.874603 | 1346 | 1355 | + | gacaataagc |
| MA0644.1 | ESX1 | 6.55987 | 0.860211 | 439 | 448 | + | cctgattact |
| MA0644.1 | ESX1 | 6.26432 | 0.852613 | 1894 | 1903 | - | aatcattaaa |
| MA0644.1 | ESX1 | 6.05617 | 0.847262 | 439 | 448 | - | agtaatcagg |
| MA0644.1 | ESX1 | 6.04067 | 0.846863 | 80 | 89 | + | atccattaca |
| MA0098.3 | ETS1 | 10.0365 | 0.902502 | 418 | 427 | - | agaggaagtg |
| MA0098.3 | ETS1 | 8.20257 | 0.871337 | 1336 | 1345 | + | tcaggatgtg |
| MA0098.1 | ETS1 | 7.63289 | 0.992422 | 251 | 256 | + | tttcct |
| MA0098.1 | ETS1 | 7.63289 | 0.992422 | 420 | 425 | + | cttcct |
| MA0098.1 | ETS1 | 7.63289 | 0.992422 | 428 | 433 | - | cttcct |
| MA0098.1 | ETS1 | 7.63289 | 0.992422 | 1452 | 1457 | + | tttcct |
| MA0098.1 | ETS1 | 7.63289 | 0.992422 | 1813 | 1818 | + | cttcct |
| MA0098.1 | ETS1 | 7.22918 | 0.973799 | 1338 | 1343 | - | catcct |
| MA0098.1 | ETS1 | 7.22918 | 0.973799 | 1655 | 1660 | - | catcct |
| MA0098.3 | ETS1 | 6.78412 | 0.847233 | 58 | 67 | + | acgggaaacg |
| MA0098.1 | ETS1 | 6.29975 | 0.930928 | 377 | 382 | + | cttcca |
| MA1484.1 | ETS2 | 7.65465 | 0.891356 | 419 | 428 | - | tagaggaagt |
| MA0761.2 | ETV1 | 12.7688 | 0.902029 | 416 | 429 | - | ctagaggaagtgag |
| MA0761.2 | ETV1 | 11.6215 | 0.880447 | 1334 | 1347 | + | actcaggatgtgga |
| MA0761.2 | ETV1 | 10.0901 | 0.851642 | 1809 | 1822 | - | ccagaggaagagag |
| MA0761.1 | ETV1 | 8.69269 | 0.876172 | 418 | 427 | - | agaggaagtg |
| MA0761.1 | ETV1 | 7.96178 | 0.862373 | 1336 | 1345 | + | tcaggatgtg |
| MA0761.1 | ETV1 | 6.06928 | 0.826644 | 58 | 67 | + | acgggaaacg |
| MA0762.1 | ETV2 | 7.88413 | 0.840892 | 418 | 428 | - | tagaggaagtg |
| MA0762.1 | ETV2 | 7.23167 | 0.830798 | 57 | 67 | + | cacgggaaacg |
| MA0763.1 | ETV3 | 8.2352 | 0.842714 | 418 | 427 | - | agaggaagtg |
| MA0763.1 | ETV3 | 8.12942 | 0.840548 | 445 | 454 | - | aactgaagta |
| MA0763.1 | ETV3 | 7.3268 | 0.824112 | 1336 | 1345 | + | tcaggatgtg |
| MA0763.1 | ETV3 | 6.64307 | 0.81011 | 64 | 73 | + | aacggtagtc |
| MA0763.1 | ETV3 | 6.53261 | 0.807848 | 628 | 637 | - | acctcaagtg |
| MA0764.2 | ETV4 | 13.3303 | 0.978214 | 418 | 427 | - | agaggaagtg |
| MA0764.2 | ETV4 | 12.1457 | 0.957422 | 1811 | 1820 | - | agaggaagag |
| MA0764.2 | ETV4 | 9.40651 | 0.909345 | 426 | 435 | + | ctaggaagcc |
| MA0764.1 | ETV4 | 8.84987 | 0.878451 | 418 | 427 | - | agaggaagtg |
| MA0764.1 | ETV4 | 8.34505 | 0.868594 | 1336 | 1345 | + | tcaggatgtg |
| MA0764.2 | ETV4 | 6.52339 | 0.858741 | 385 | 394 | - | acaggtagga |
| MA0765.2 | ETV5 | 11.3442 | 0.923299 | 417 | 427 | + | tcacttcctct |
| MA0765.1 | ETV5 | 8.86011 | 0.896013 | 418 | 427 | - | agaggaagtg |
| MA0765.2 | ETV5 | 8.4352 | 0.855708 | 766 | 776 | - | caacctccgcc |
| MA0765.1 | ETV5 | 8.35644 | 0.885243 | 1336 | 1345 | + | tcaggatgtg |
| MA0765.2 | ETV5 | 8.25038 | 0.851414 | 1069 | 1079 | + | taacttccctt |
| MA0765.2 | ETV5 | 7.861 | 0.842367 | 374 | 384 | + | ccccttccagc |
| MA0765.2 | ETV5 | 7.63639 | 0.837148 | 1810 | 1820 | + | tctcttcctct |
| MA0765.2 | ETV5 | 7.49431 | 0.833847 | 1911 | 1921 | - | ccacctcctcc |
| MA0765.2 | ETV5 | 7.31329 | 0.829641 | 1336 | 1346 | - | ccacatcctga |
| MA0765.2 | ETV5 | 6.68192 | 0.814971 | 556 | 566 | - | gaacttctgga |
| MA0765.2 | ETV5 | 6.38214 | 0.808006 | 882 | 892 | + | tcacctccttt |
| MA0765.2 | ETV5 | 6.34289 | 0.807094 | 1361 | 1371 | - | tgccctccggc |
| MA0765.2 | ETV5 | 6.2334 | 0.80455 | 1726 | 1736 | - | aggcttccccc |
| MA0765.1 | ETV5 | 6.14597 | 0.837979 | 766 | 775 | + | ggcggaggtt |
| MA0765.2 | ETV5 | 6.10387 | 0.801541 | 368 | 378 | + | gtccttcccct |
| MA0645.1 | ETV6 | 13.7892 | 0.964134 | 418 | 427 | - | agaggaagtg |
| MA0645.1 | ETV6 | 8.77337 | 0.878232 | 1811 | 1820 | - | agaggaagag |
| MA0645.1 | ETV6 | 6.85824 | 0.845433 | 1070 | 1079 | - | aagggaagtt |
| MA0645.1 | ETV6 | 6.60531 | 0.841101 | 369 | 378 | - | aggggaagga |
| MA0645.1 | ETV6 | 6.42543 | 0.83802 | 766 | 775 | + | ggcggaggtt |
| MA0887.1 | EVX1 | 8.48037 | 0.915569 | 695 | 704 | + | aaaaattagc |
| MA0887.1 | EVX1 | 8.47707 | 0.915494 | 439 | 448 | + | cctgattact |
| MA0887.1 | EVX1 | 8.26542 | 0.910678 | 1197 | 1206 | - | aatcattaag |
| MA0887.1 | EVX1 | 7.82023 | 0.900547 | 1894 | 1903 | - | aatcattaaa |
| MA0887.1 | EVX1 | 7.27698 | 0.888185 | 1171 | 1180 | - | aaccattaac |
| MA0887.1 | EVX1 | 6.75862 | 0.876389 | 439 | 448 | - | agtaatcagg |
| MA0887.1 | EVX1 | 6.70999 | 0.875282 | 1213 | 1222 | + | attcattact |
| MA0887.1 | EVX1 | 6.42773 | 0.868859 | 1469 | 1478 | - | acacattaga |
| MA0887.1 | EVX1 | 6.36533 | 0.867439 | 1200 | 1209 | + | aatgattgcc |
| MA0887.1 | EVX1 | 6.32027 | 0.866414 | 1927 | 1936 | - | aaacattaac |
| MA0888.1 | EVX2 | 8.74704 | 0.923268 | 439 | 448 | + | cctgattact |
| MA0888.1 | EVX2 | 8.48385 | 0.917591 | 1197 | 1206 | - | aatcattaag |
| MA0888.1 | EVX2 | 8.08383 | 0.908964 | 1894 | 1903 | - | aatcattaaa |
| MA0888.1 | EVX2 | 8.04668 | 0.908163 | 695 | 704 | + | aaaaattagc |
| MA0888.1 | EVX2 | 7.26474 | 0.8913 | 1171 | 1180 | - | aaccattaac |
| MA0888.1 | EVX2 | 6.98871 | 0.885347 | 1213 | 1222 | + | attcattact |
| MA0888.1 | EVX2 | 6.35594 | 0.8717 | 439 | 448 | - | agtaatcagg |
| MA0888.1 | EVX2 | 6.31102 | 0.870731 | 1469 | 1478 | - | acacattaga |
| MA0888.1 | EVX2 | 6.11851 | 0.866579 | 1927 | 1936 | - | aaacattaac |
| MA1485.1 | FERD3L | 6.38208 | 0.839013 | 1426 | 1439 | - | atgcctgctggcac |
| MA0156.1 | FEV | 9.4709 | 0.909927 | 419 | 426 | - | gaggaagt |
| MA0156.1 | FEV | 9.08908 | 0.896575 | 1337 | 1344 | + | caggatgt |
| MA0156.2 | FEV | 8.80307 | 0.885954 | 418 | 427 | - | agaggaagtg |
| MA0156.2 | FEV | 8.247 | 0.876636 | 1336 | 1345 | + | tcaggatgtg |
| MA0156.1 | FEV | 7.70002 | 0.848001 | 1071 | 1078 | - | agggaagt |
| MA0156.1 | FEV | 6.75612 | 0.814994 | 1963 | 1970 | - | ccagaaat |
| MA0156.1 | FEV | 6.5609 | 0.808168 | 557 | 564 | + | ccagaagt |
| MA0156.1 | FEV | 6.32888 | 0.800054 | 35 | 42 | - | aaggcaat |
| MA0156.1 | FEV | 6.32888 | 0.800054 | 465 | 472 | - | aagggaat |
| MA0820.1 | FIGLA | 11.8555 | 0.95231 | 584 | 593 | + | cacacctgta |
| MA0820.1 | FIGLA | 9.42884 | 0.903978 | 893 | 902 | + | gccacctgca |
| MA0820.1 | FIGLA | 7.71988 | 0.869942 | 584 | 593 | - | tacaggtgtg |
| MA0820.1 | FIGLA | 6.76133 | 0.850851 | 1410 | 1419 | + | cccaccttga |
| MA0820.1 | FIGLA | 6.23429 | 0.840354 | 1421 | 1430 | - | ggcacctgag |
| MA0820.1 | FIGLA | 6.1567 | 0.838809 | 1538 | 1547 | + | aactcctggc |
| MA0475.1 | FLI1 | 14.0584 | 0.952557 | 417 | 427 | - | agaggaagtga |
| MA0475.1 | FLI1 | 9.69502 | 0.88753 | 1336 | 1346 | + | tcaggatgtgg |
| MA0475.1 | FLI1 | 9.68287 | 0.887349 | 1810 | 1820 | - | agaggaagaga |
| MA0475.1 | FLI1 | 8.7304 | 0.873155 | 248 | 258 | - | ggaggaaactg |
| MA0475.2 | FLI1 | 8.12873 | 0.884931 | 418 | 427 | - | agaggaagtg |
| MA0475.1 | FLI1 | 6.71756 | 0.843158 | 1911 | 1921 | + | ggaggaggtgg |
| MA0475.1 | FLI1 | 6.62994 | 0.841852 | 1449 | 1459 | - | ggaggaaaaag |
| MA0475.2 | FLI1 | 6.54113 | 0.863296 | 1336 | 1345 | + | tcaggatgtg |
| MA0475.1 | FLI1 | 6.53952 | 0.840504 | 374 | 384 | - | gctggaagggg |
| MA0475.2 | FLI1 | 6.43926 | 0.861908 | 58 | 67 | + | acgggaaacg |
| MA0475.1 | FLI1 | 6.30969 | 0.837079 | 58 | 68 | + | acgggaaacgg |
| MA0099.2 | FOS::JUN | 8.68023 | 0.92759 | 241 | 247 | + | tgactga |
| MA0099.2 | FOS::JUN | 8.18522 | 0.909521 | 737 | 743 | - | tgcctca |
| MA0099.3 | FOS::JUN | 8.10524 | 0.854865 | 1593 | 1602 | + | atgagccacc |
| MA0099.2 | FOS::JUN | 6.78923 | 0.858566 | 815 | 821 | + | tgacaga |
| MA0099.2 | FOS::JUN | 6.74348 | 0.856895 | 330 | 336 | + | tcactca |
| MA0099.2 | FOS::JUN | 6.69649 | 0.85518 | 1218 | 1224 | + | ttactga |
| MA0099.2 | FOS::JUN | 6.65634 | 0.853715 | 780 | 786 | - | tggctca |
| MA0099.2 | FOS::JUN | 6.65634 | 0.853715 | 1594 | 1600 | - | tggctca |
| MA0099.2 | FOS::JUN | 6.65634 | 0.853715 | 1833 | 1839 | + | tgactcc |
| MA0099.2 | FOS::JUN | 6.57416 | 0.850715 | 829 | 835 | - | agactca |
| MA0099.2 | FOS::JUN | 6.5068 | 0.848256 | 1211 | 1217 | - | tgaatct |
| MA0099.3 | FOS::JUN | 6.3212 | 0.820339 | 735 | 744 | - | ctgcctcagc |
| MA0099.3 | FOS::JUN | 6.20361 | 0.818063 | 1226 | 1235 | - | gtgtatcatg |
| MA0099.2 | FOS::JUN | 6.01618 | 0.830348 | 330 | 336 | - | tgagtga |
| MA1134.1 | FOS::JUNB | 7.49341 | 0.838759 | 1592 | 1603 | + | catgagccacca |
| MA1134.1 | FOS::JUNB | 6.8333 | 0.827212 | 1591 | 1602 | - | ggtggctcatgc |
| MA1141.1 | FOS::JUND | 7.98211 | 0.83922 | 1591 | 1603 | + | gcatgagccacca |
| MA1127.1 | FOSB::JUN | 8.30874 | 0.814082 | 443 | 453 | - | actgaagtaat |
| MA1135.1 | FOSB::JUNB | 8.09658 | 0.859558 | 1593 | 1602 | - | ggtggctcat |
| MA1136.1 | FOSB::JUNB(var.2) | 6.60985 | 0.804733 | 789 | 798 | - | gtggcgcaat |
| MA1136.1 | FOSB::JUNB(var.2) | 6.58674 | 0.804266 | 443 | 452 | - | ctgaagtaat |
| MA1136.1 | FOSB::JUNB(var.2) | 6.55792 | 0.803684 | 443 | 452 | + | attacttcag |
| MA1136.1 | FOSB::JUNB(var.2) | 6.4944 | 0.802401 | 789 | 798 | + | attgcgccac |
| MA0477.1 | FOSL1 | 8.502 | 0.886599 | 1592 | 1602 | - | ggtggctcatg |
| MA0477.2 | FOSL1 | 7.54904 | 0.843549 | 1591 | 1603 | - | tggtggctcatgc |
| MA1128.1 | FOSL1::JUN | 8.05993 | 0.842798 | 1591 | 1603 | - | tggtggctcatgc |
| MA1129.1 | FOSL1::JUN(var.2) | 7.51533 | 0.81294 | 789 | 798 | - | gtggcgcaat |
| MA1129.1 | FOSL1::JUN(var.2) | 7.50774 | 0.812772 | 789 | 798 | + | attgcgccac |
| MA1137.1 | FOSL1::JUNB | 8.81618 | 0.848909 | 1591 | 1603 | - | tggtggctcatgc |
| MA1142.1 | FOSL1::JUND | 8.8844 | 0.886265 | 1593 | 1602 | - | ggtggctcat |
| MA1142.1 | FOSL1::JUND | 7.33924 | 0.844667 | 1226 | 1235 | + | catgatacac |
| MA1142.1 | FOSL1::JUND | 6.53268 | 0.822954 | 1209 | 1218 | + | caagattcat |
| MA1142.1 | FOSL1::JUND | 6.43315 | 0.820274 | 1831 | 1840 | + | agtgactcca |
| MA1142.1 | FOSL1::JUND | 6.42003 | 0.819921 | 1592 | 1601 | + | catgagccac |
| MA1142.1 | FOSL1::JUND | 6.04277 | 0.809765 | 735 | 744 | + | gctgaggcag |
| MA1143.1 | FOSL1::JUND(var.2) | 7.54808 | 0.832061 | 789 | 798 | - | gtggcgcaat |
| MA1143.1 | FOSL1::JUND(var.2) | 7.00397 | 0.817073 | 1832 | 1841 | + | gtgactccag |
| MA1143.1 | FOSL1::JUND(var.2) | 6.59358 | 0.805768 | 1802 | 1811 | + | atgatgcctc |
| MA1143.1 | FOSL1::JUND(var.2) | 6.44015 | 0.801541 | 443 | 452 | - | ctgaagtaat |
| MA0478.1 | FOSL2 | 10.95 | 0.924543 | 1593 | 1603 | - | tggtggctcat |
| MA1130.1 | FOSL2::JUN | 7.44994 | 0.839503 | 1591 | 1602 | + | gcatgagccacc |
| MA1130.1 | FOSL2::JUN | 6.05183 | 0.813613 | 735 | 746 | - | ttctgcctcagc |
| MA1131.1 | FOSL2::JUN(var.2) | 7.05067 | 0.81258 | 442 | 452 | + | gattacttcag |
| MA1138.1 | FOSL2::JUNB | 7.89048 | 0.855233 | 1593 | 1602 | - | ggtggctcat |
| MA1139.1 | FOSL2::JUNB(var.2) | 6.78417 | 0.800809 | 442 | 453 | + | gattacttcagt |
| MA1144.1 | FOSL2::JUND | 7.94868 | 0.853748 | 1593 | 1602 | - | ggtggctcat |
| MA1145.1 | FOSL2::JUND(var.2) | 8.00156 | 0.808061 | 441 | 455 | + | tgattacttcagttt |
| MA0148.3 | FOXA1 | 14.3233 | 0.951318 | 1186 | 1200 | + | tctctgtttacctta |
| MA0148.2 | FOXA1 | 11.9217 | 0.923705 | 1190 | 1200 | + | tgtttacctta |
| MA0148.1 | FOXA1 | 11.9118 | 0.923114 | 1190 | 1200 | + | tgtttacctta |
| MA0148.2 | FOXA1 | 11.6724 | 0.919428 | 1476 | 1486 | + | tgtttatttat |
| MA0148.1 | FOXA1 | 11.6427 | 0.91844 | 1476 | 1486 | + | tgtttatttat |
| MA0148.4 | FOXA1 | 11.4783 | 0.900412 | 1187 | 1198 | - | aggtaaacagag |
| MA0148.3 | FOXA1 | 11.1876 | 0.916271 | 1476 | 1490 | + | tgtttatttatttat |
| MA0148.3 | FOXA1 | 10.6901 | 0.910711 | 1472 | 1486 | + | aatgtgtttatttat |
| MA0148.3 | FOXA1 | 10.3198 | 0.906572 | 1480 | 1494 | + | tatttatttatactt |
| MA0148.4 | FOXA1 | 9.55739 | 0.862998 | 874 | 885 | - | gtgaaaacatcc |
| MA0148.4 | FOXA1 | 9.25061 | 0.857023 | 1780 | 1791 | + | gactaaacatgg |
| MA0148.4 | FOXA1 | 9.23647 | 0.856748 | 1473 | 1484 | - | aaataaacacat |
| MA0148.2 | FOXA1 | 8.91747 | 0.87217 | 1480 | 1490 | + | tatttatttat |
| MA0148.1 | FOXA1 | 8.89156 | 0.870656 | 1480 | 1490 | + | tatttatttat |
| MA0148.1 | FOXA1 | 8.77419 | 0.868618 | 1 | 11 | - | tgtttgatctt |
| MA0148.2 | FOXA1 | 8.56622 | 0.866144 | 1 | 11 | - | tgtttgatctt |
| MA0148.4 | FOXA1 | 8.38812 | 0.840224 | 168 | 179 | - | tggtaaacttgg |
| MA0148.2 | FOXA1 | 8.33568 | 0.86219 | 1778 | 1788 | - | tgtttagtctc |
| MA0148.2 | FOXA1 | 8.33143 | 0.862117 | 1484 | 1494 | + | tatttatactt |
| MA0148.1 | FOXA1 | 8.31799 | 0.860695 | 1484 | 1494 | + | tatttatactt |
| MA0148.1 | FOXA1 | 8.30596 | 0.860486 | 1778 | 1788 | - | tgtttagtctc |
| MA0148.4 | FOXA1 | 7.84183 | 0.829584 | 1889 | 1900 | - | cattaaacaaga |
| MA0148.4 | FOXA1 | 6.94588 | 0.812133 | 1929 | 1940 | - | agacaaacatta |
| MA0148.2 | FOXA1 | 6.65306 | 0.833326 | 1932 | 1942 | + | tgtttgtctgg |
| MA0148.1 | FOXA1 | 6.63296 | 0.831428 | 1932 | 1942 | + | tgtttgtctgg |
| MA0148.4 | FOXA1 | 6.61828 | 0.805753 | 1477 | 1488 | - | aaataaataaac |
| MA0148.1 | FOXA1 | 6.49871 | 0.829096 | 1892 | 1902 | + | tgtttaatgat |
| MA0148.4 | FOXA1 | 6.46308 | 0.80273 | 1481 | 1492 | - | gtataaataaat |
| MA0148.4 | FOXA1 | 6.45575 | 0.802587 | 438 | 449 | - | aagtaatcaggg |
| MA0148.2 | FOXA1 | 6.2966 | 0.827211 | 1892 | 1902 | + | tgtttaatgat |
| MA0148.3 | FOXA1 | 6.0993 | 0.859401 | 1778 | 1792 | - | cccatgtttagtctc |
| MA0148.1 | FOXA1 | 6.06393 | 0.821545 | 877 | 887 | + | tgttttcacct |
| MA0047.3 | FOXA2 | 12.8944 | 0.95336 | 1188 | 1198 | - | aggtaaacaga |
| MA0047.3 | FOXA2 | 10.5302 | 0.906198 | 1474 | 1484 | - | aaataaacaca |
| MA0047.3 | FOXA2 | 9.40158 | 0.883683 | 1478 | 1488 | - | aaataaataaa |
| MA0047.3 | FOXA2 | 8.91282 | 0.873933 | 1482 | 1492 | - | gtataaataaa |
| MA0047.3 | FOXA2 | 8.61397 | 0.867971 | 439 | 449 | - | aagtaatcagg |
| MA0047.3 | FOXA2 | 7.70709 | 0.84988 | 875 | 885 | - | gtgaaaacatc |
| MA0047.3 | FOXA2 | 7.23666 | 0.840496 | 169 | 179 | - | tggtaaacttg |
| MA0047.3 | FOXA2 | 7.22862 | 0.840335 | 1780 | 1790 | + | gactaaacatg |
| MA0047.3 | FOXA2 | 6.68166 | 0.829424 | 1890 | 1900 | - | cattaaacaag |
| MA1683.1 | FOXA3 | 13.1998 | 0.969133 | 1188 | 1198 | - | aggtaaacaga |
| MA1683.1 | FOXA3 | 10.6859 | 0.911518 | 1474 | 1484 | - | aaataaacaca |
| MA1683.1 | FOXA3 | 8.81285 | 0.86859 | 1890 | 1900 | - | cattaaacaag |
| MA1683.1 | FOXA3 | 8.68137 | 0.865577 | 1478 | 1488 | - | aaataaataaa |
| MA1683.1 | FOXA3 | 8.65287 | 0.864923 | 1780 | 1790 | + | gactaaacatg |
| MA1683.1 | FOXA3 | 8.36564 | 0.85834 | 1482 | 1492 | - | gtataaataaa |
| MA1683.1 | FOXA3 | 8.14672 | 0.853323 | 439 | 449 | - | aagtaatcagg |
| MA1683.1 | FOXA3 | 7.58928 | 0.840547 | 875 | 885 | - | gtgaaaacatc |
| MA1683.1 | FOXA3 | 7.504 | 0.838593 | 169 | 179 | - | tggtaaacttg |
| MA0845.1 | FOXB1 | 12.472 | 0.920551 | 1479 | 1489 | - | taaataaataa |
| MA0845.1 | FOXB1 | 11.0472 | 0.898121 | 1483 | 1493 | - | agtataaataa |
| MA0845.1 | FOXB1 | 9.91451 | 0.880289 | 1475 | 1485 | - | taaataaacac |
| MA0845.1 | FOXB1 | 9.30422 | 0.870681 | 1189 | 1199 | - | aaggtaaacag |
| MA0845.1 | FOXB1 | 6.9703 | 0.833939 | 959 | 969 | + | tgtatccatat |
| MA0845.1 | FOXB1 | 6.73231 | 0.830192 | 958 | 968 | - | tatggatacat |
| MA0845.1 | FOXB1 | 6.21785 | 0.822093 | 1341 | 1351 | - | attgtccacat |
| MA0032.2 | FOXC1 | 13.7056 | 0.959227 | 1479 | 1489 | - | taaataaataa |
| MA0032.2 | FOXC1 | 11.4815 | 0.925839 | 1475 | 1485 | - | taaataaacac |
| MA0032.2 | FOXC1 | 11.4593 | 0.925507 | 1483 | 1493 | - | agtataaataa |
| MA0032.2 | FOXC1 | 9.89709 | 0.902057 | 1189 | 1199 | - | aaggtaaacag |
| MA0032.2 | FOXC1 | 7.98336 | 0.87333 | 1779 | 1789 | + | agactaaacat |
| MA0032.1 | FOXC1 | 6.72314 | 0.958133 | 9 | 16 | + | acaaagta |
| MA0032.1 | FOXC1 | 6.72314 | 0.958133 | 1313 | 1320 | - | cccaagta |
| MA0032.1 | FOXC1 | 6.50074 | 0.945693 | 318 | 325 | - | acagagta |
| MA0032.2 | FOXC1 | 6.48008 | 0.850764 | 876 | 886 | - | ggtgaaaacat |
| MA0032.1 | FOXC1 | 6.4601 | 0.943419 | 287 | 294 | - | agccagta |
| MA0032.1 | FOXC1 | 6.40121 | 0.940125 | 49 | 56 | + | attaagta |
| MA0032.1 | FOXC1 | 6.40121 | 0.940125 | 95 | 102 | - | tgagagta |
| MA0032.1 | FOXC1 | 6.17882 | 0.927685 | 1219 | 1226 | - | gttcagta |
| MA0846.1 | FOXC2 | 14.6894 | 0.962771 | 1478 | 1489 | - | taaataaataaa |
| MA0846.1 | FOXC2 | 13.2963 | 0.940985 | 1474 | 1485 | - | taaataaacaca |
| MA0846.1 | FOXC2 | 12.0248 | 0.921099 | 1482 | 1493 | - | agtataaataaa |
| MA0846.1 | FOXC2 | 11.935 | 0.919696 | 1188 | 1199 | - | aaggtaaacaga |
| MA0846.1 | FOXC2 | 7.44102 | 0.849414 | 1930 | 1941 | - | cagacaaacatt |
| MA0846.1 | FOXC2 | 6.90313 | 0.841002 | 1779 | 1790 | + | agactaaacatg |
| MA0031.1 | FOXD1 | 11.3621 | 0.96142 | 1189 | 1196 | - | gtaaacag |
| MA0031.1 | FOXD1 | 9.41226 | 0.895822 | 1782 | 1789 | + | ctaaacat |
| MA0031.1 | FOXD1 | 9.24466 | 0.890183 | 1891 | 1898 | - | ttaaacaa |
| MA0031.1 | FOXD1 | 8.26945 | 0.857375 | 170 | 177 | - | gtaaactt |
| MA0031.1 | FOXD1 | 8.26945 | 0.857375 | 876 | 883 | - | gaaaacat |
| MA0031.1 | FOXD1 | 7.86417 | 0.84374 | 1475 | 1482 | - | ataaacac |
| MA0031.1 | FOXD1 | 7.26622 | 0.823624 | 440 | 447 | - | gtaatcag |
| MA0847.2 | FOXD2 | 13.1798 | 0.933652 | 1475 | 1487 | - | aataaataaacac |
| MA0847.1 | FOXD2 | 11.6458 | 1 | 1190 | 1196 | - | gtaaaca |
| MA0847.2 | FOXD2 | 11.4227 | 0.911128 | 1479 | 1491 | - | tataaataaataa |
| MA0847.2 | FOXD2 | 11.35 | 0.910196 | 1189 | 1201 | - | ttaaggtaaacag |
| MA0847.1 | FOXD2 | 10.6003 | 0.977827 | 1476 | 1482 | - | ataaaca |
| MA0847.2 | FOXD2 | 9.38353 | 0.884988 | 1483 | 1495 | - | aaagtataaataa |
| MA0847.1 | FOXD2 | 9.19033 | 0.947923 | 1480 | 1486 | - | ataaata |
| MA0847.1 | FOXD2 | 9.19033 | 0.947923 | 1484 | 1490 | - | ataaata |
| MA0847.1 | FOXD2 | 8.86128 | 0.940945 | 877 | 883 | - | gaaaaca |
| MA0847.1 | FOXD2 | 8.35322 | 0.93017 | 1932 | 1938 | - | acaaaca |
| MA0847.1 | FOXD2 | 8.32187 | 0.929505 | 171 | 177 | - | gtaaact |
| MA0847.1 | FOXD2 | 7.34323 | 0.90875 | 1782 | 1788 | + | ctaaaca |
| MA0847.1 | FOXD2 | 7.27635 | 0.907332 | 451 | 457 | - | ataaact |
| MA0847.1 | FOXD2 | 6.70681 | 0.895253 | 1892 | 1898 | - | ttaaaca |
| MA0847.1 | FOXD2 | 6.40577 | 0.888868 | 516 | 522 | - | aaaaata |
| MA0847.1 | FOXD2 | 6.40577 | 0.888868 | 687 | 693 | + | aaaaata |
| MA0847.1 | FOXD2 | 6.30984 | 0.886834 | 441 | 447 | - | gtaatca |
| MA1487.1 | FOXE1 | 12.3581 | 0.883575 | 1474 | 1488 | - | aaataaataaacaca |
| MA1487.1 | FOXE1 | 6.83618 | 0.811708 | 683 | 697 | + | tactaaaaatacaaa |
| MA1487.1 | FOXE1 | 6.46191 | 0.806837 | 1930 | 1944 | - | aaccagacaaacatt |
| MA0030.1 | FOXF2 | 13.368 | 0.904512 | 1188 | 1201 | - | ttaaggtaaacaga |
| MA0030.1 | FOXF2 | 9.34306 | 0.81343 | 1478 | 1491 | - | tataaataaataaa |
| MA0613.1 | FOXG1 | 11.7804 | 0.957207 | 1475 | 1482 | - | ataaacac |
| MA0613.1 | FOXG1 | 8.36235 | 0.892386 | 1189 | 1196 | - | gtaaacag |
| MA0613.1 | FOXG1 | 7.89026 | 0.883433 | 1891 | 1898 | - | ttaaacaa |
| MA0613.1 | FOXG1 | 7.32076 | 0.872633 | 1782 | 1789 | + | ctaaacat |
| MA0613.1 | FOXG1 | 6.6492 | 0.859897 | 170 | 177 | - | gtaaactt |
| MA0613.1 | FOXG1 | 6.6492 | 0.859897 | 876 | 883 | - | gaaaacat |
| MA0613.1 | FOXG1 | 6.49448 | 0.856963 | 1078 | 1085 | - | agaaacaa |
| MA0613.1 | FOXG1 | 6.49448 | 0.856963 | 1350 | 1357 | + | ataagcaa |
| MA0613.1 | FOXG1 | 6.49448 | 0.856963 | 1479 | 1486 | - | ataaataa |
| MA0613.1 | FOXG1 | 6.49448 | 0.856963 | 1483 | 1490 | - | ataaataa |
| MA0479.1 | FOXH1 | 9.18824 | 0.901882 | 1476 | 1486 | - | ataaataaaca |
| MA0479.1 | FOXH1 | 8.35873 | 0.890213 | 451 | 461 | - | gagaataaact |
| MA0479.1 | FOXH1 | 6.86193 | 0.869157 | 1892 | 1902 | - | atcattaaaca |
| MA0479.1 | FOXH1 | 6.3835 | 0.862427 | 940 | 950 | + | tccaatactca |
| MA0042.1 | FOXI1 | 13.4969 | 0.961618 | 1477 | 1488 | + | gtttatttattt |
| MA0042.2 | FOXI1 | 13.2222 | 1 | 1190 | 1196 | - | gtaaaca |
| MA0042.1 | FOXI1 | 12.8689 | 0.946457 | 1473 | 1484 | + | atgtgtttattt |
| MA0042.1 | FOXI1 | 10.3208 | 0.884941 | 1929 | 1940 | + | taatgtttgtct |
| MA0042.2 | FOXI1 | 10.1939 | 0.942145 | 1476 | 1482 | - | ataaaca |
| MA0042.1 | FOXI1 | 8.49379 | 0.840831 | 691 | 702 | - | taatttttgtat |
| MA0042.1 | FOXI1 | 7.98463 | 0.828539 | 1481 | 1492 | + | atttatttatac |
| MA0042.1 | FOXI1 | 7.87473 | 0.825886 | 1933 | 1944 | + | gtttgtctggtt |
| MA0042.1 | FOXI1 | 7.75361 | 0.822962 | 1896 | 1907 | + | taatgattgtat |
| MA0042.2 | FOXI1 | 7.54595 | 0.891555 | 1480 | 1486 | - | ataaata |
| MA0042.2 | FOXI1 | 7.54595 | 0.891555 | 1484 | 1490 | - | ataaata |
| MA0042.2 | FOXI1 | 7.41285 | 0.889012 | 877 | 883 | - | gaaaaca |
| MA0042.2 | FOXI1 | 7.28252 | 0.886522 | 441 | 447 | - | gtaatca |
| MA0042.1 | FOXI1 | 7.23062 | 0.810336 | 1889 | 1900 | + | tcttgtttaatg |
| MA0042.2 | FOXI1 | 6.72807 | 0.875929 | 1782 | 1788 | + | ctaaaca |
| MA0852.2 | FOXK1 | 13.617 | 0.931012 | 1186 | 1199 | - | aaggtaaacagaga |
| MA0852.2 | FOXK1 | 9.37322 | 0.845421 | 1472 | 1485 | - | taaataaacacatt |
| MA0852.2 | FOXK1 | 9.27577 | 0.843456 | 1779 | 1792 | + | agactaaacatggg |
| MA0852.2 | FOXK1 | 8.96647 | 0.837217 | 437 | 450 | - | gaagtaatcaggga |
| MA0852.2 | FOXK1 | 8.88025 | 0.835478 | 1075 | 1088 | - | tggagaaacaaggg |
| MA0852.2 | FOXK1 | 8.8663 | 0.835197 | 1888 | 1901 | - | tcattaaacaagat |
| MA0852.2 | FOXK1 | 8.59625 | 0.82975 | 873 | 886 | - | ggtgaaaacatccc |
| MA0852.2 | FOXK1 | 8.09977 | 0.819737 | 1476 | 1489 | - | taaataaataaaca |
[truncated: 1,286,362 more chars]
